# Supplementary material for: Electrochemical deconstruction of alkyl substituted boron clusters to produce alkyl boronate esters
Source: Royal Society of Chemistry journal article supplement (doi:10.1039/d4cc04232h), 2024-01-01
Supplement: d4cc04232h1.pdf [file d4cc04232h1.pdf]

## Supporting Information

for

### Electrochemical deconstruction of alkyl substituted boron clusters to produce alkyl boronate esters

Huanhuan Xie,<sup>a†</sup> Xinyin Gao,<sup>a†</sup> Beibei Dong,<sup>a</sup> Haoyang Wang,<sup>c</sup> Alexander M.  
Spokoyny,<sup>\*b</sup> Xin Mu,<sup>\*a</sup>

<sup>a</sup> Engineering Research Center of Pharmaceutical Process Chemistry, Ministry of Education; School of Pharmacy, East China University of Science and Technology, 130 Meilong Road, 200237, Shanghai, China. [xinmu@ecust.edu.cn](mailto:xinmu@ecust.edu.cn)

<sup>b</sup> Department of Chemistry and Biochemistry, University of California, Los Angeles, 607 Charles E. Young Drive East, Los Angeles, California 90095, United States; California NanoSystems Institute (CNSI), University of California, Los Angeles, Los Angeles, California 90095, United States. [spokoyny@chem.ucla.edu](mailto:spokoyny@chem.ucla.edu)

<sup>c</sup> Laboratory of Mass Spectrometry Analysis, Shanghai Institute of Organic Chemistry, Chinese Academy of Sciences, 200032, Shanghai, China. [haoyangwang@sioc.ac.cn](mailto:haoyangwang@sioc.ac.cn)

## Materials and Methods

|                                                                                                                                                                               |     |
|-------------------------------------------------------------------------------------------------------------------------------------------------------------------------------|-----|
| 1. General information.....                                                                                                                                                   | 3   |
| 2. Preparation of <i>closo</i> -hexaborate anion 1 precursor .....                                                                                                            | 4   |
| 3. Optimization of reaction conditions for alkylation of <i>closo</i> -hexaborate anion.....                                                                                  | 7   |
| 4. Optimization of reaction conditions for the bulk electrolysis.....                                                                                                         | 8   |
| 5. Preparation of alkyl halides and alkyl pseudohalides .....                                                                                                                 | 10  |
| 6. Preparation of chiral alkyl pseudohalides .....                                                                                                                            | 13  |
| 7. Reaction procedures for the nucleophilic substitutions and electrochemical deconstruction of alkyl substituted hexaborate clusters, and product characterization data..... | 30  |
| 8. Substitutions of chiral electrophiles, electrochemical deconstruction procedures and characterization data.....                                                            | 70  |
| 9. Intramolecular nucleophilic borylation of unactivated alkyl chloride .....                                                                                                 | 94  |
| 10. Investigations of the boron-containing fragments after the bulk electrolysis.....                                                                                         | 98  |
| 11. References and notes .....                                                                                                                                                | 100 |
| 12. NMR spectra of chiral alkyl pseudohalides .....                                                                                                                           | 101 |
| 13. NMR spectra of borylation products.....                                                                                                                                   | 109 |

## 1. General information

### General considerations

Reactions were performed using standard Schlenk techniques under N<sub>2</sub> atmosphere. DME, 1,4-dioxane and toluene were distilled over sodium in the presence of benzophenone and stored in a Straus flask. Acetonitrile was distilled over calcium hydride under N<sub>2</sub> atmosphere and stored in a Straus flask. Anhydrous diglyme, TCE, BF<sub>3</sub>•Et<sub>2</sub>O were prepared by distilling over calcium hydride under the reduced pressure. K<sub>3</sub>PO<sub>4</sub>, *t*-BuOLi, NaHMDS and KHMDS were purchased from J&K Scientific and used without further purification. Et<sub>3</sub>N was purchased from BOER. LiHMDS and DABCO were purchased from Energy Chemical. *t*-BuOK was purchased from TCI. *t*-BuONa was purchased from TCI and Energy Chemical. NaBH<sub>4</sub> was purchased from Alfa Aesar and Acros. Substrates were purchased from Bidepharm and Adamas-beta. TBAPF<sub>6</sub> was purchased from Leyan and recrystallized in 200 proof ethanol three times before use. Deuterated solvents were purchased from Cambridge Isotope Laboratories and Energy Chemical. All other reagents were purchased from commercial vendors and used without further purification.

### Instrumentations

<sup>1</sup>H, <sup>13</sup>C{<sup>1</sup>H}, <sup>11</sup>B{<sup>1</sup>H}, <sup>11</sup>B and <sup>19</sup>F{<sup>1</sup>H} NMR spectra were recorded on a AVANCE III 400 and Ascend 600v spectrometers. MestReNova (Version 14.2.1 Build 27684 x64) software was used to process the NMR data. <sup>1</sup>H and <sup>13</sup>C{<sup>1</sup>H} spectra were referenced to residual solvent resonances in deuterated solvents (CDCl<sub>3</sub>: <sup>1</sup>H, δ 7.26; <sup>13</sup>C, δ 77.00; note: due to humidity, residual H<sub>2</sub>O signals are often present). Mass spectrometry data was acquired using GCT Premier and Xevo G2 TOF mass spectrometer by direct injection. Agilent high-resolution mass spectrometry was used to collect mass data for the final products. Both IKA ElectraSyn 2.0 and customized electrochemical cells with DC power supply were used for the bulk electrolysis experiments described.

## 2. Preparation of *closo*-hexaborate anion 1 precursor

### Synthesis of *n*-Bu<sub>4</sub>N(B<sub>6</sub>H<sub>7</sub>) (1)<sup>1</sup>

A 1 L round bottom, three-neck flask was charged with 15 g (397 mmol) of NaBH<sub>4</sub>. The flask was tightly sealed by the rubber stoppers and was evacuated and backfilled with N<sub>2</sub> three times. 200 mL of dry diglyme were added to the reaction flask with stirring. The reaction mixture was then heated in an oil bath at 60 °C for 30 minutes. Holding the oil bath at 60 °C, BF<sub>3</sub>·Et<sub>2</sub>O (24 mL, 187 mmol based on BF<sub>3</sub>, diluted with 25 mL dry diglyme) was then added dropwise over 60-90 minutes, resulting in bubbling and dissolution of any solids remaining in the reaction flask. After the addition of BF<sub>3</sub>·Et<sub>2</sub>O was complete, the reaction mixture was heated to 100 °C for 1 hr. and then heated to 185 °C for 36 hr. During the course of the reaction, Na<sub>2</sub>B<sub>6</sub>H<sub>6</sub> and other borates precipitated out of the diglyme solution. The reaction mixture was then allowed to cool to approximately room temperature before being filtered and washed with an additional 100 mL of diglyme to remove Na<sub>2</sub>B<sub>12</sub>H<sub>12</sub>. The collected solids were then stirred with 150 mL of water for 30 min. to hydrolyze lower boranes. Precipitated borates were then removed by filtration and the water was removed by rotary evaporation under reduced pressure. Additional amounts of borates can be removed by concentrating the water solution and performing a second filtration. The dried Na<sub>2</sub>B<sub>6</sub>H<sub>6</sub> was then washed 3 × 20 mL with acetonitrile and then 3 × 20 mL with acetone before being further dried *in vacuo* and gave 3.2580 g Na<sub>2</sub>B<sub>6</sub>H<sub>6</sub>. A 200 mL round flask was charged with Na<sub>2</sub>B<sub>6</sub>H<sub>6</sub> (2.5499 g, 22 mmol) and H<sub>2</sub>O (25 mL). Under stirring, an aqueous solution of *n*-Bu<sub>4</sub>NBr (6.3491 g, 19.7 mmol) in 25 mL of H<sub>2</sub>O was added. A large amount of white precipitate formed immediately. The reaction mixture was stirred for another two hours. The white precipitate was collected by filtration and washed with H<sub>2</sub>O (3 × 10 mL), then the white solid was dried *in vacuo* to remove residual water. Recrystallization from hot EtOH/MeOH (1:1, v/v) gave white crystals (2.0213 g, 33%).

<sup>1</sup>H NMR (400 MHz, CDCl<sub>3</sub>) δ 3.23 – 3.19 (m, 8H), 1.68 – 1.58 (m, 8H), 1.44 (h, *J* = 7.3 Hz, 8H), 1.00 (t, *J* = 7.3 Hz, 12H), -5.29 (s, *facial proton*, 1H).

<sup>13</sup>C{<sup>1</sup>H} NMR (101 MHz, CDCl<sub>3</sub>) δ 59.02, 24.07, 19.68, 13.65.

<sup>11</sup>B NMR (128 MHz, CDCl<sub>3</sub>) -13.46 (d, *J* = 146.3 Hz, 6B).

<sup>11</sup>B{<sup>1</sup>H} NMR (128 MHz, CDCl<sub>3</sub>) δ -13.47.

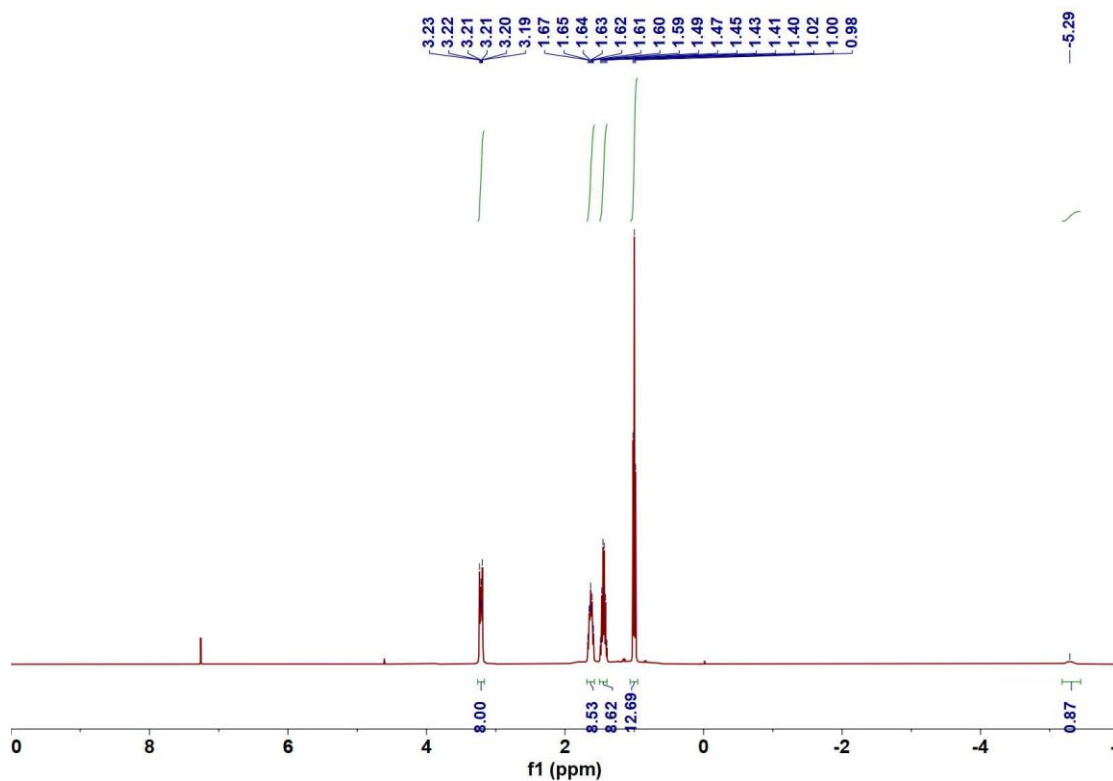

Figure S1.  $^1\text{H}$  NMR spectrum of  $n\text{-Bu}_4\text{N}(\text{B}_6\text{H}_7)$  in  $\text{CDCl}_3$  at 298K

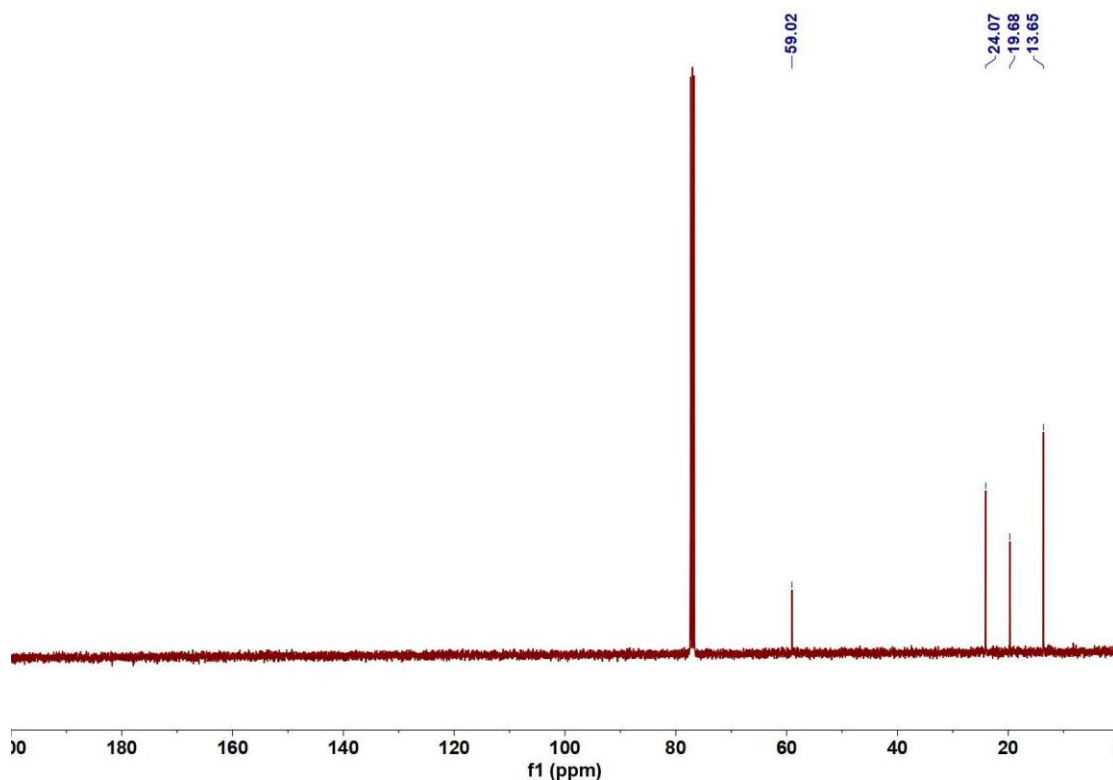

Figure S2.  $^{13}\text{C}\{^1\text{H}\}$  NMR spectrum of  $n\text{-Bu}_4\text{N}(\text{B}_6\text{H}_7)$  in  $\text{CDCl}_3$  at 298K

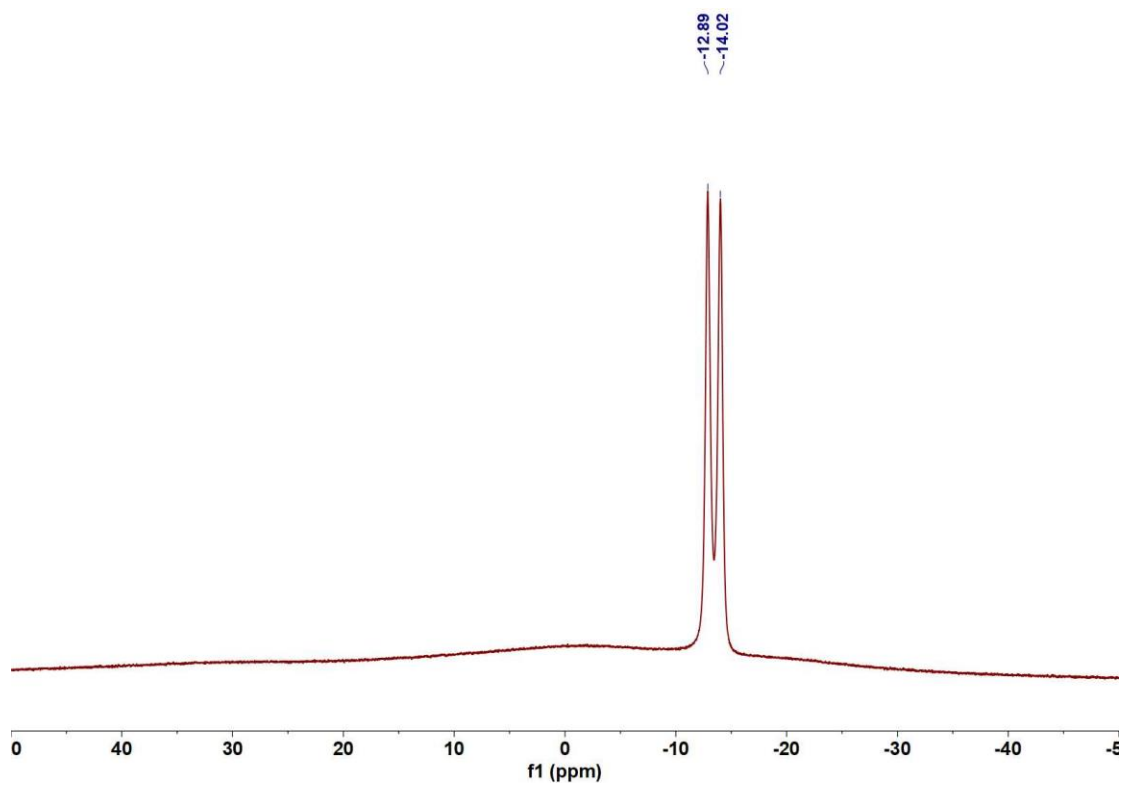

**Figure S3.**  $^{11}\text{B}$  NMR spectrum of  $n\text{-Bu}_4\text{N}(\text{B}_6\text{H}_7)$  in  $\text{CDCl}_3$  at 298K

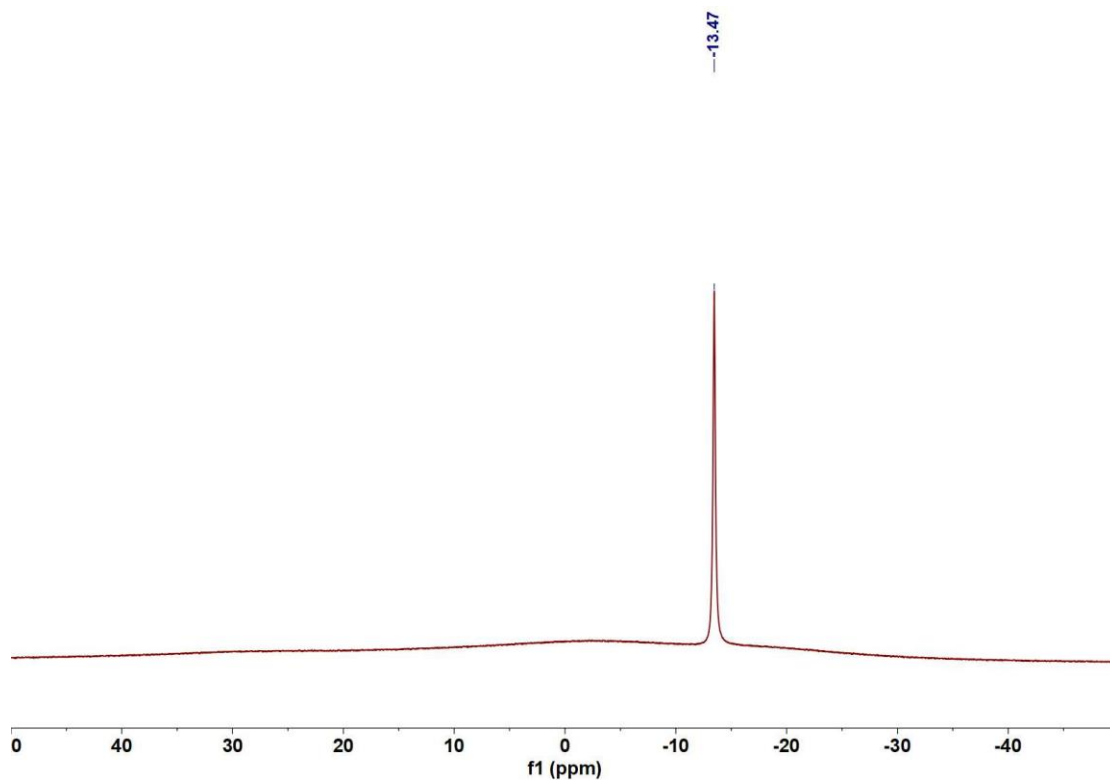

**Figure S4.**  $^{11}\text{B}\{^1\text{H}\}$  NMR spectrum of  $n\text{-Bu}_4\text{N}(\text{B}_6\text{H}_7)$  in  $\text{CDCl}_3$  at 298K

### 3. Optimization of reaction conditions for alkylation of *closo*-hexaborate anion

#### General procedures for optimization of reaction conditions

To a 10 mL oven dried Schlenk tube equipped with a magnetic stir bar, *n*-Bu<sub>4</sub>N(B<sub>6</sub>H<sub>7</sub>) (**1**) (31.2 mg, 0.1 mmol, 1 equiv), and *t*-BuONa (9.6 mg, 0.1 mmol, 1 equiv) were added sequentially. The tube was evacuated and backfilled with N<sub>2</sub> three times. Dry MeCN (0.5 mL) was added via syringe. Then the solution of benzyl bromide (17.1 mg, 0.1 mmol, 1 equiv) in dry MeCN (0.5 mL) was added. The mixture was then magnetically stirred while being heated in oil bath at 100 °C for 12 hours. The flask was cooled to room temperature and aliquot sample was subjected to spectroscopic analysis. <sup>11</sup>B NMR spectroscopy was used to determine conversion.

**Table S1** Optimization of reaction conditions for alkylation of *closo*-hexaborate anion

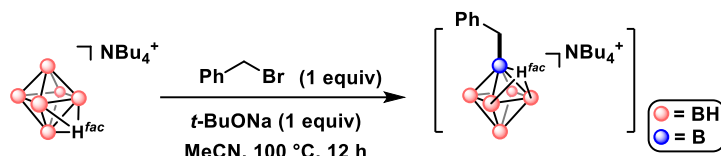

| Entry | Deviation from standard reaction condition                                          | conversion (%) <sup>a</sup> |
|-------|-------------------------------------------------------------------------------------|-----------------------------|
| 1     | None                                                                                | 85                          |
| 2     | K <sub>3</sub> PO <sub>4</sub> instead of <i>t</i> -BuONa                           | 38                          |
| 3     | 1.2 equiv of K <sub>3</sub> PO <sub>4</sub> instead of 1.0 equiv of <i>t</i> -BuONa | 50                          |
| 4     | 1.5 equiv of K <sub>3</sub> PO <sub>4</sub> instead of 1.0 equiv of <i>t</i> -BuONa | 54                          |
| 5     | <i>t</i> -BuOK instead of <i>t</i> -BuONa                                           | 85                          |
| 6     | <i>t</i> -BuOLi instead of <i>t</i> -BuONa                                          | 13                          |
| 7     | LiHMDS instead of <i>t</i> -BuONa                                                   | 53                          |
| 8     | NaHMDS instead of <i>t</i> -BuONa                                                   | trace                       |
| 9     | KHMDS instead of <i>t</i> -BuONa                                                    | 44                          |
| 10    | DABCO instead of <i>t</i> -BuONa                                                    | trace                       |
| 11    | 80 °C instead of 100 °C                                                             | 85                          |
| 12    | 120 °C instead of 100 °C                                                            | 84                          |
| 13    | Toluene instead of MeCN                                                             | 79                          |
| 14    | 1,4-Dioxane instead of MeCN                                                         | 83                          |

[a] <sup>11</sup>B NMR conversion

#### 4. Optimization of reaction conditions for the bulk electrolysis

##### General procedures for optimization of reaction conditions

To a 10 mL oven dried Schlenk tube equipped with a magnetic stir bar, *n*-Bu<sub>4</sub>N(B<sub>6</sub>H<sub>7</sub>) (1) (31.2 mg, 0.1 mmol, 1 equiv), and *t*-BuONa (9.6 mg, 0.1 mmol, 1 equiv) were added sequentially. The tube was evacuated and backfilled with N<sub>2</sub> three times. Dry MeCN (0.5 mL) was added via syringe. Then the solution of benzyl bromide (17.1 mg, 0.1 mmol, 1 equiv) in dry MeCN (0.5 mL) was added. The mixture was then magnetically stirred while being heated in oil bath at 100 °C for 12 hours. Then the heating bath was removed and the flask was cooled down to room temperature.

To a 5 mL electrochemical reaction cell equipped with a magnetic stir bar, pinacol (118.2 mg, 1 mmol, 10 equiv), MgSO<sub>4</sub> (144.4 mg, 1.2 mmol, 12 equiv), and TBAPF<sub>6</sub> (116.3 mg, 0.3 mmol, 0.1 M) were added sequentially. The cell was evacuated and backfilled with N<sub>2</sub> three times. Dry MeCN (1.5 mL) was added. Then the solution of the crude product of the substituted cluster in dry TCE (1.5 mL) was added. The undivided cell was equipped with RVC (3.5 mm×0.5 mm×0.4 mm) as both the anode and cathode and then backfilled with N<sub>2</sub> atmosphere. The mixture was pre-stirred for five minutes, and then subjected to the bulk electrolysis under constant current mode of 6 mA until passing 2.20 F/mol of total charge (1 hour) at room temperature. <sup>1</sup>H NMR spectroscopic yields were determined using 1,3,5-trimethoxybenzene as the internal standard, and isolated yields are based on the two-step protocol.

**Table S2** Optimization of reaction conditions for electrolysis

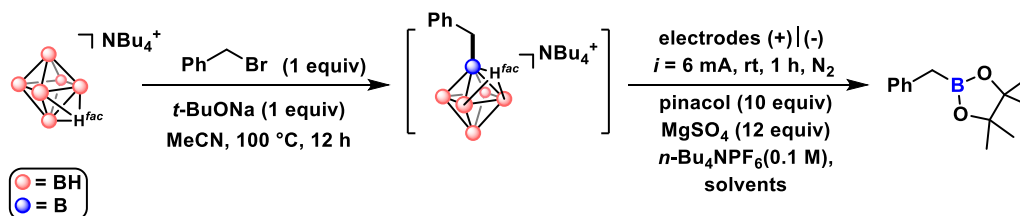

| Entry | Solvents             | electrodes         | Yield (%) <sup>[b]</sup> |
|-------|----------------------|--------------------|--------------------------|
| 1     | MeCN                 | RVC(+) RVC(-)      | 29                       |
| 3     | MeCN:DCE = 1:1(v/v)  | RVC(+) RVC(-)      | 73                       |
| 4     | MeCN:DCM = 1:1(v/v)  | RVC(+) RVC(-)      | 74                       |
| 5     | MeCN:MeOH = 1:1(v/v) | RVC(+) RVC(-)      | 46                       |
| 2     | MeCN:TCE = 1:1(v/v)  | RVC(+) RVC(-)      | 83                       |
| 6     | MeCN:TCE = 2:1(v/v)  | RVC(+) RVC(-)      | 77                       |
| 7     | MeCN:TCE = 5:1(v/v)  | RVC(+) RVC(-)      | 80                       |
| 8     | MeCN:TCE = 1:1(v/v)  | RVC(+) RVC(-)      | 69 <sup>[c]</sup>        |
| 9     | MeCN:TCE = 1:1(v/v)  | Glassy C; Glassy C | 65                       |
| 10    | MeCN:TCE = 1:1(v/v)  | GF(+) GF(-)        | 28                       |
| 11    | MeCN:TCE= 1:1(v/v)   | RVC(+) RVC(-)      | 79 <sup>[d]</sup>        |
| 12    | MeCN:TCE= 1:1(v/v)   | RVC(+) RVC(-)      | 63 <sup>[e]</sup>        |



|           |                    |               |                      |
|-----------|--------------------|---------------|----------------------|
| <b>13</b> | MeCN:TCE= 1:1(v/v) | RVC(+) RVC(-) | trace <sup>[f]</sup> |
|-----------|--------------------|---------------|----------------------|

[b] <sup>1</sup>H NMR yields were determined by using 1,3,5-trimethoxybenzene as the internal standard, yields are based on the two-step protocol. [c] 12 mA current. [d] 0.5 h electrolysis. [e] LiPF<sub>6</sub> as the electrolyte. [f] LiCl as the electrolyte.

## 5. Preparation of alkyl halides and alkyl pseudohalides

Majority of the benzyl and alkyl bromides used in the studies are commercially available and were used as received.

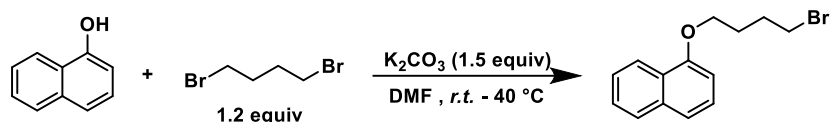

1-Naphthol (434.7 mg, 3 mmol, 1 equiv), potassium carbonate (626.3 mg, 4.5 mmol, 1.5 equiv) and a magnetic stir bar were added to a 50 mL three-neck bottle. The bottle was tightly sealed with the rubber stoppers and was evacuated and backfilled with  $N_2$  three times, then dry DMF (10 mL) was added. The mixture was stirred for 5 min, then the solution of 1,4-dibromobutane (775.1 mg, 3.6 mmol, 1.2 equiv) in dry DMF (5 mL) was added. The reaction solution was stirred in a 40 °C oil bath for 6 hours. Full consumption of the starting material was confirmed by TLC. Water (20 mL) was added to the mixture and extracted with DCM (20 mL), the organic layers were dried over  $Na_2SO_4$  and concentrated *in vacuo*. Subsequent purification via a silical gel column chromatography afforded a white solid (332.0 mg, 40%) (Petroleum: EtOAc = 10:1,  $R_f$  = 0.7).

$^1H$  NMR (400 MHz,  $CDCl_3$ )  $\delta$  8.29 – 8.26 (m, 1H), 7.84 – 7.79 (m, 1H), 7.53 – 7.47 (m, 2H), 7.45 – 7.36 (m, 2H), 6.81 (d,  $J$  = 7.47 Hz, 1H), 4.18 (t,  $J$  = 5.8 Hz, 2H), 3.56 (t,  $J$  = 6.5 Hz, 2H), 2.23 – 2.16 (m, 2H), 2.14 – 2.07 (m, 2H).

$^{13}C\{^1H\}$  NMR (101 MHz,  $CDCl_3$ )  $\delta$  154.52, 134.44, 127.43, 126.35, 125.81, 125.57, 125.14, 121.88, 120.20, 104.47, 66.92, 33.53, 29.65, 27.85.

The NMR spectra are consistent with literature report.<sup>2</sup> CAS registry No. 87723-21-5

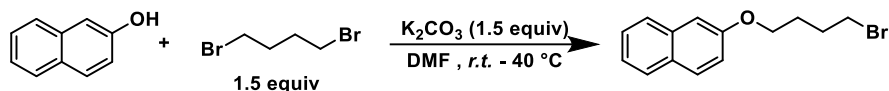

2-Naphthol (435.0 mg, 3 mmol, 1 equiv), potassium carbonate (625.1 mg, 4.5 mmol, 1.5 equiv) and a magnetic stir bar were added to a 50 mL three-neck bottle. The bottle was tightly sealed with the rubber stoppers and was evacuated and backfilled with  $N_2$  three times, then dry DMF (10 mL) was added. The mixture was stirred for 5 min, then the solution of 1,4-dibromobutane (983.6 mg, 4.5 mmol, 1.5 equiv) in dry DMF (5 mL) was added. The reaction solution was stirred in a 40 °C oil bath for 6 hours. Full consumption of the starting material was confirmed by TLC. Water (20 mL) was added to the mixture and extracted with DCM (20 mL), the organic layers were dried over  $Na_2SO_4$  and concentrated *in vacuo*. Subsequent purification via a silical gel column chromatography afforded a white solid (377.6 mg, 45%) (Petroleum,  $R_f$  = 0.28).

$^1H$  NMR (400 MHz,  $CDCl_3$ )  $\delta$  7.81 – 7.70 (m, 3H), 7.44 (ddd,  $J$  = 8.1, 6.8, 1.3 Hz, 1H), 7.34 (ddd,  $J$  = 8.1, 6.8, 1.3 Hz, 1H), 7.13 – 7.16 (m, 2H), 4.12 (t,  $J$  = 6.0 Hz, 2H), 3.53 (t,  $J$  = 6.5 Hz, 2H), 2.08 – 2.18 (m, 2H), 2.07 – 1.97 (m, 2H).

$^{13}C\{^1H\}$  NMR (101 MHz,  $CDCl_3$ )  $\delta$  156.79, 134.52, 129.39, 128.95, 127.62, 126.68, 126.35, 123.59, 118.85, 106.55, 66.80, 33.46, 29.51, 27.85.

The NMR spectra are consistent with literature report.<sup>3</sup> CAS registry No. 87723-22-6



TsCl (629.3 mg, 3.3 mmol, 1.1 equiv), DMAP (74.7 mg, 0.6 mmol, 0.2 equiv) and a magnetic stir bar were added to a 100 mL Schlenk bottle. The bottle was tightly sealed with the rubber stoppers and was evacuated and backfilled with N<sub>2</sub> three times, then dry DCM (10 mL) and Et<sub>3</sub>N (0.84 mL, 6 mmol, 2 equiv) were added. The mixture was stirred for 5 min and cooled to 0 °C, then the solution of thiophene-3-ethanol (388.5 mg, 3 mmol, 1 equiv) in dry DCM (5 mL) was added. After addition, the ice bath was removed and the mixture was kept stirring for 14 hours. Full consumption of the starting material was confirmed by TLC. Water (10 mL) was added to the mixture and extracted with DCM (10 mL×3), the organic layers were dried over Na<sub>2</sub>SO<sub>4</sub> and concentrated *in vacuo*. Subsequent purification via a silical gel column chromatography afforded a white solid (643.9 mg, 77%) (Petroleum: EtOAc = 3:1, R<sub>f</sub> = 0.75). **<sup>1</sup>H NMR (400 MHz, CDCl<sub>3</sub>)** δ 7.64 (d, *J* = 8.3 Hz, 2H), 7.23 (d, *J* = 8.1 Hz, 2H), 7.14 (dd, *J* = 5.0, 3.0 Hz, 1H), 6.90 – 6.87 (m, 1H), 6.80 – 6.77 (m, 1H), 4.13 (t, *J* = 6.9 Hz, 2H), 2.91 (t, *J* = 6.9 Hz, 2H), 2.36 (s, 3H).

**<sup>13</sup>C{<sup>1</sup>H} NMR (101 MHz, CDCl<sub>3</sub>)** δ 144.71, 136.38, 132.97, 129.80, 128.02, 127.83, 125.83, 122.13, 69.92, 29.82, 21.63.

The NMR spectra are consistent with literature report.<sup>6</sup> CAS registry No. 40412-09-7

## 6. Preparation of chiral alkyl pseudohalides

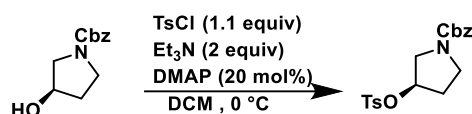

TsCl (417.9 mg, 2.2 mmol, 1.1 equiv), DMAP (48.3 mg, 0.4 mmol, 0.2 equiv) and a magnetic stir bar were added to a 50 mL Schlenk bottle. The bottle was tightly sealed with the rubber stoppers and was evacuated and backfilled with N<sub>2</sub> three times, then dry DCM (5 mL) and Et<sub>3</sub>N (0.6 mL, 4 mmol, 2 equiv) were added. The mixture was stirred for 5 min and cooled to 0 °C, then the solution of (*R*)-(+)-1-Cbz-3-pyrrolidinol (421.5 mg, 2 mmol, 1 equiv) in dry DCM (2 mL) was added. After addition, the mixture was kept stirring for 2 hours at 0 °C. Full consumption of the starting material was confirmed by TLC. Water (5 mL) was added to the mixture and extracted with DCM (5 mL×3), the organic layers were dried over Na<sub>2</sub>SO<sub>4</sub> and concentrated *in vacuo*. Subsequent purification via a silical gel column chromatography afforded a colorless oil (498.9 mg, 70%, >99:1 *e.r.*, [α]<sub>D</sub><sup>22.5</sup> = 6.4 (c = 0.8, CHCl<sub>3</sub>)) (Petroleum: EtOAc = 4:1, R<sub>f</sub> = 0.27).

<sup>1</sup>H NMR (600 MHz, CDCl<sub>3</sub>) δ 7.78 (d, *J* = 2.2 Hz, 2H), 7.37 – 7.29 (m, 7H), 5.20 – 4.98 (m, 3H), 3.64 – 3.45 (m, 4H), 2.44 (d, *J* = 6.3 Hz, 3H), 2.24 – 1.94 (m, 2H).

<sup>13</sup>C{<sup>1</sup>H} NMR (101 MHz, CDCl<sub>3</sub>) δ 154.47, 154.37, 145.05, 136.47, 133.56, 129.96, 129.93, 128.40, 127.96, 127.83, 127.61, 80.39, 79.67, 66.89, 51.91, 51.65, 43.76, 43.42, 32.27, 31.28, 21.57.

The NMR spectra are consistent with literature report.<sup>7</sup> CAS registry No. 158654-83-2

Chiral HPLC conditions: IF column (30% *i*-PrOH/hexanes, flow rate 1.0 mL/min, 25 °C); retention time for chiral compound (Fig. S6): *t*<sub>1</sub> = 18.632 min (major), *t*<sub>2</sub> = 24.104 min (minor).

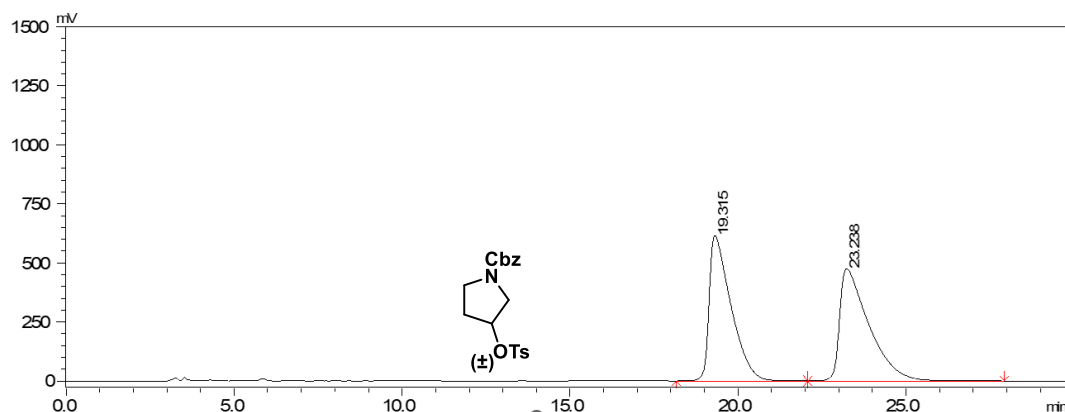

**Figure S5.** HPLC trace of benzyl 3-(tosyloxy)pyrrolidine-1-carboxylate.

| #     | Ret Time (min) | Height (μV) | Area (μV.sec) | Area (%) |
|-------|----------------|-------------|---------------|----------|
| 1     | 19.315         | 615824      | 27781643      | 49.226   |
| 2     | 23.238         | 474986      | 28655583      | 50.774   |
| total |                | 1090810     | 56437226      | 100.000  |

**Table S3.** HPLC trace of benzyl 3-(tosyloxy)pyrrolidine-1-carboxylate.

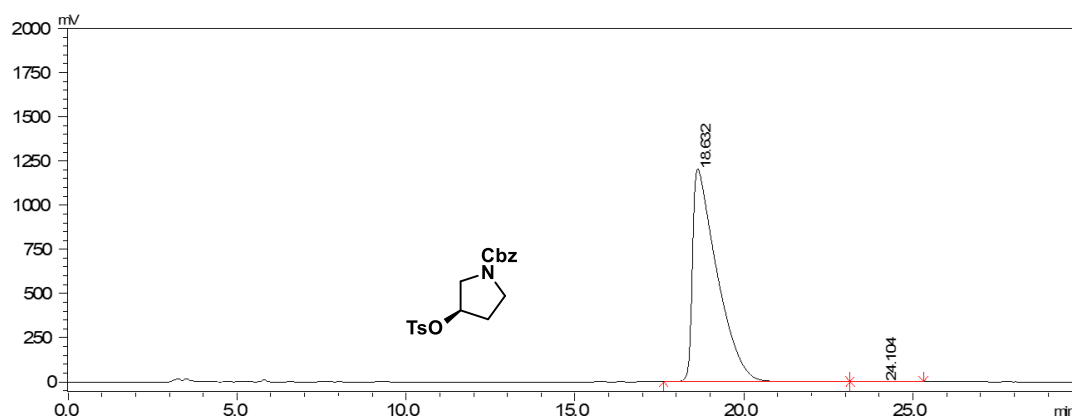

**Figure S6.** HPLC trace of benzyl (*R*)-3-(tosyloxy)pyrrolidine-1-carboxylate.

| #     | Ret Time (min) | Height ( $\mu$ V) | Area ( $\mu$ V.sec) | Area (%) |
|-------|----------------|-------------------|---------------------|----------|
| 1     | 18.632         | 1204771           | 60500806            | 99.952   |
| 2     | 24.104         | 585               | 29150               | 0.048    |
| total |                | 1205356           | 60529956            | 100.000  |

**Table S4.** HPLC trace of benzyl (*R*)-3-(tosyloxy)pyrrolidine-1-carboxylate.

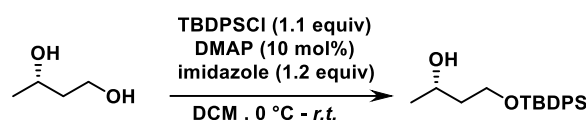

Imidazole (407.1 mg, 6 mmol, 1.2 equiv), DMAP (60.6 mg, 0.5 mmol, 0.1 equiv) and a magnetic stir bar were added to a 50 mL Schlenk bottle. The bottle was tightly sealed with the rubber stoppers and was evacuated and backfilled with  $N_2$  three times, then dry DCM (15 mL) was added. The mixture was stirred for 5 min and cooled to 0 °C, then the solution of (*S*)-(+)-1,3-butaneiol (458.5 mg, 5 mmol, 1 equiv) and TBDPSCI (1511.7 mg, 5.5 mmol, 1.1 equiv) in dry DCM (10 mL) was added. After addition, the ice bath was removed and the mixture was kept stirring for 12 hours. Full consumption of the starting material was confirmed by TLC. Water (15 mL) was added to the mixture and extracted with DCM (15 mL $\times$ 3), the organic layers were dried over  $Na_2SO_4$  and concentrated *in vacuo*. Subsequent purification via a silical gel column chromatography afforded a colorless oil (1398.5 mg, 84%) (Petroleum: EtOAc = 8:1,  $R_f$  = 0.27).

$^1H$  NMR (600 MHz,  $CDCl_3$ )  $\delta$  7.73 – 7.65 (m, 4H), 7.48 – 7.36 (m, 6H), 4.12 – 4.07 (m, 1H), 3.91 – 3.82 (m, 2H), 3.25 (s, 1H), 1.79 – 1.71 (m, 1H), 1.68 – 1.60 (m, 1H), 1.22 (d,  $J$  = 6.2 Hz, 3H), 1.06 (s, 9H).

The NMR spectra are consistent with literature report.<sup>8</sup> CAS registry No. 1240290-96-3

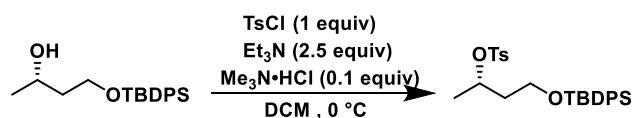

TsCl (812.2 mg, 4.25 mmol, 1 equiv),  $Me_3N \cdot HCl$  (44.0 mg, 0.43 mmol, 0.1 equiv) and a magnetic stir bar were added to a 50 mL Schlenk bottle. The bottle was tightly sealed with the rubber stoppers and was evacuated and backfilled with  $N_2$  three times, then dry DCM (5 mL)

and Et<sub>3</sub>N (1.5 mL, 10.6 mmol, 2.5 equiv) were added. The mixture was stirred for 5 min and cooled to 0 °C, then the solution of (2*S*)-4-[[[(1,1-dimethylethyl)diphenylsilyl]oxy]-2-butanol (1395.4 mg, 4.25 mmol, 1 equiv) in dry DCM (5 mL) was added. After addition, the mixture was kept stirring for 2 hours at 0 °C. Full consumption of the starting material was confirmed by TLC. Water (10 mL) was added to the mixture and extracted with DCM (10 mL×3), the organic layers were dried over Na<sub>2</sub>SO<sub>4</sub> and concentrated *in vacuo*. Subsequent purification via a silical gel column chromatography afforded a colorless oil (1263.7 mg, 62%, 98.5:1.5 *e.r.*, [ $\alpha$ ]<sub>D</sub><sup>22.6</sup> = -1.4 (c = 0.8, CHCl<sub>3</sub>)) (Petroleum: EtOAc = 20:1, R<sub>f</sub> = 0.26).

<sup>1</sup>H NMR (400 MHz, CDCl<sub>3</sub>)  $\delta$  7.76 (d, *J* = 8.3 Hz, 2H), 7.62 – 7.55 (m, 4H), 7.47 – 7.41 (m, 2H), 7.41 – 7.34 (m, 4H), 7.27 – 7.22 (m, 2H), 4.90 – 4.80 (m, 1H), 3.56 (t, *J* = 6.1 Hz, 2H), 2.39 (s, 3H), 1.94 – 1.83 (m, 1H), 1.73 – 1.63 (m, 1H), 1.32 (d, *J* = 6.3 Hz, 3H), 1.01 (s, 9H).

<sup>13</sup>C{<sup>1</sup>H} NMR (101 MHz, CDCl<sub>3</sub>)  $\delta$  144.32, 135.48, 135.45, 134.39, 133.50, 133.46, 129.70, 129.67, 127.70, 127.67, 127.65, 77.95, 59.70, 39.26, 26.75, 21.59, 20.97, 19.09.

The NMR spectra are consistent with literature report.<sup>9</sup>

Chiral HPLC conditions: AS column (5% *i*-PrOH/hexanes, flow rate 1.0 mL/min, 25 °C); retention time for chiral compound (Fig. S8): *t*<sub>1</sub> = 8.595 min (major), *t*<sub>2</sub> = 11.010 min (minor).

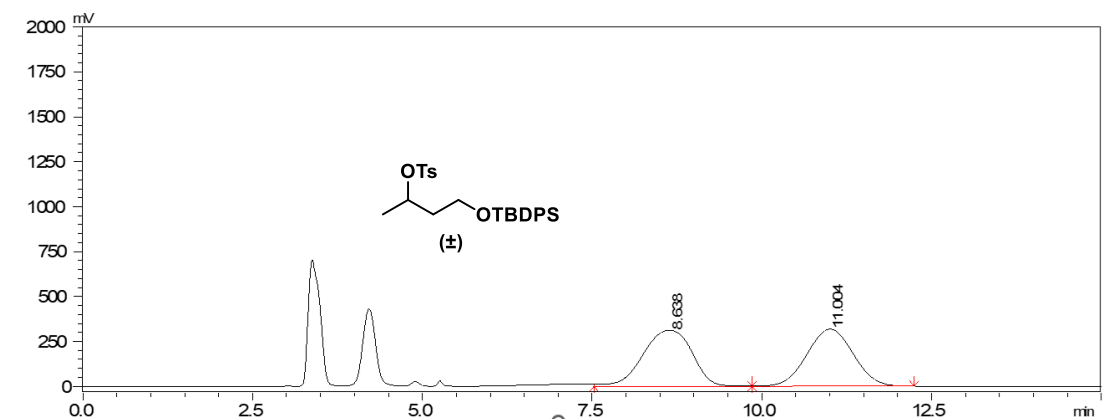

**Figure S7.** HPLC trace of 4-((tert-butyldiphenylsilyl)oxy)butan-2-yl 4-methylbenzenesulfonate.

| #     | Ret Time (min) | Height (μV) | Area (μV.sec) | Area (%) |
|-------|----------------|-------------|---------------|----------|
| 1     | 8.638          | 311373      | 15600823      | 50.956   |
| 2     | 11.004         | 316899      | 15015615      | 49.044   |
| total |                | 628272      | 30616438      | 100.000  |

**Table S5.** HPLC trace of 4-((tert-butyldiphenylsilyl)oxy)butan-2-yl 4-methylbenzenesulfonate.

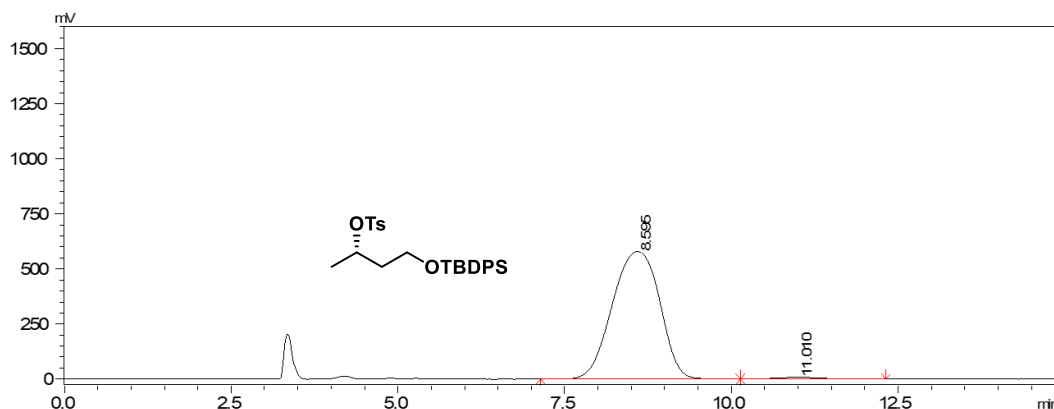

**Figure S8.** HPLC trace of (*S*)-4-((*tert*-butyldiphenylsilyl)oxy)butan-2-yl 4-methylbenzenesulfonate.

| #     | Ret Time (min) | Height ( $\mu$ V) | Area ( $\mu$ V.sec) | Area (%) |
|-------|----------------|-------------------|---------------------|----------|
| 1     | 8.595          | 579383            | 28704926            | 98.559   |
| 2     | 11.010         | 8412              | 419814              | 1.441    |
| total |                | 587795            | 29124740            | 100.000  |

**Table S6.** HPLC trace of (*S*)-4-((*tert*-butyldiphenylsilyl)oxy)butan-2-yl 4-methylbenzenesulfonate.

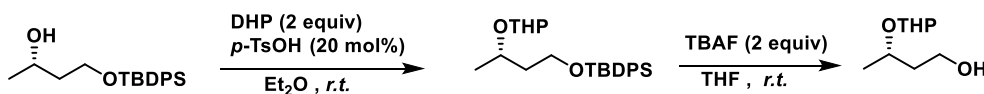

*p*-TsOH (603.9 mg, 3.2 mmol, 0.2 equiv) and a magnetic stir bar were added to a 250 mL Schlenk bottle. The bottle was tightly sealed with the rubber stoppers and was evacuated and backfilled with N<sub>2</sub> three times, then dry Et<sub>2</sub>O (70 mL) was added. The mixture was stirred for 5 min, then the solution of (*S*)-4-[[[(1,1-dimethylethyl)diphenylsilyl]oxy]-2-butanol (5228.0 mg, 16 mmol, 1 equiv) and DHP (2706.4 mg, 32 mmol, 2 equiv) in dry Et<sub>2</sub>O (20 mL) was added. After addition, the mixture was kept stirring for 16 hours. Full consumption of the starting material was confirmed by TLC. Water (5 mL) was added to the mixture and extracted with EtOAc (5 mL×3), the organic layers were dried over Na<sub>2</sub>SO<sub>4</sub> and concentrated *in vacuo*. Subsequent purification via a silical gel column chromatography afforded a colorless oil (3841.5 mg, 58%) (Petroleum: EtOAc = 9:1, R<sub>f</sub> = 0.63).

<sup>1</sup>H NMR (400 MHz, CDCl<sub>3</sub>)  $\delta$  7.71 – 7.63 (m, 8H), 7.46 – 7.34 (m, 12H), 4.76 – 4.72 (m, 1H), 4.64 – 4.59 (m, 1H), 4.08 – 3.89 (m, 3H), 3.88 – 3.66 (m, 5H), 3.51 – 3.40 (m, 2H), 1.93 – 1.39 (m, 16H), 1.24 (d, *J* = 6.3 Hz, 3H), 1.12 (d, *J* = 6.1 Hz, 3H), 1.05 (d, *J* = 1.7 Hz, 18H).

Tert-butyldiphenyl((*S*)-3-((tetrahydro-2*H*-pyran-2-yl)oxy)butoxy)silane (3841.5 mg, 9.3 mmol) and a magnetic stir bar were added to a 100 mL bottle. The bottle was tightly sealed with the rubber stoppers, then dry THF (45 mL) was added. The mixture was stirred for 5 min, then TBAF (1.0 M in THF, 18.6 mmol, 18.6 mL, 2 equiv) was added. After addition, the mixture was kept stirring for 3 hours. Full consumption of the starting material was confirmed by TLC. the organic layers were concentrated *in vacuo*. Subsequent purification via a silical gel column chromatography afforded a colorless oil (1398.2 mg, 86%) (Petroleum: EtOAc =



1:1,  $R_f = 0.23$ ).

**$^1\text{H NMR}$  (400 MHz,  $\text{CDCl}_3$ )**  $\delta$  4.66 – 4.60 (m, 1H), 4.56 – 4.48 (m, 1H), 4.01 – 3.81 (m, 4H), 3.79 – 3.58 (m, 4H), 3.48 – 3.39 (m, 2H), 3.27 (s, 1H), 2.65 (s, 1H), 1.78 – 1.59 (m, 8H), 1.51 – 1.37 (m, 8H), 1.22 (d,  $J = 6.3$  Hz, 3H), 1.10 (d,  $J = 6.2$  Hz, 3H).

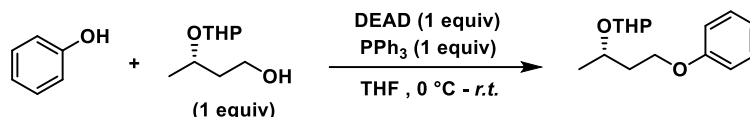

Phenol (384.0 mg, 4 mmol),  $\text{PPh}_3$  (1088.8 mg, 4 mmol, 1 equiv) and a magnetic stir bar were added to a 50 mL Schlenk bottle. The bottle was tightly sealed with the rubber stoppers and was evaluated and backfilled with  $\text{N}_2$  three times, then dry THF (4 mL) was added. The mixture was stirred for 5 min and cooled to  $0^\circ\text{C}$ , then the solution of (3*S*)-3-[(tetrahydro-2*H*-pyran-2-yl)oxy]-1-butanol (696.5 mg, 4 mmol, 1 equiv) in dry THF (2 mL) was added. The solution of DEAD (705.9 mg, 4 mmol, 1 equiv) in dry THF (2 mL) was added dropwise and the reaction was warmed to room temperature and stirred for 18 hours. Full consumption of the starting material was confirmed by TLC. Water (5 mL) was added to the mixture and extracted with EtOAc (5 mL $\times$ 3), the organic layers were dried over  $\text{Na}_2\text{SO}_4$  and concentrated *in vacuo*. Subsequent purification via a silical gel column chromatography afforded a colorless oil (548.5 mg, 55%) (Petroleum: EtOAc = 20:1,  $R_f = 0.29$ ).

**$^1\text{H NMR}$  (400 MHz,  $\text{CDCl}_3$ )**  $\delta$  7.33 – 7.23 (m, 4H), 6.98 – 6.86 (m, 6H), 4.78 – 4.72 (m, 1H), 4.66 – 4.60 (m, 1H), 4.19 – 3.90 (m, 7H), 3.84 – 3.74 (m, 1H), 3.54 – 3.39 (m, 2H), 2.06 – 1.88 (m, 4H), 1.88 – 1.61 (m, 4H), 1.61 – 1.40 (m, 8H), 1.32 (d,  $J = 6.3$  Hz, 3H), 1.20 (d,  $J = 6.2$  Hz, 3H).

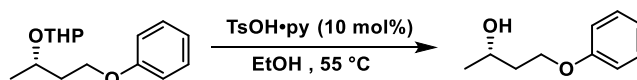

$\text{TsOH}\cdot\text{py}$  (56.3 mg, 0.2 mmol, 0.1 equiv) and a magnetic stir bar were added to a 50 mL Schlenk bottle. The bottle was tightly sealed with the rubber stoppers and was evaluated and backfilled with  $\text{N}_2$  three times, then dry EtOH (3 mL) was added. The mixture was stirred for 5 min, then the solution of tetrahydro-2-[(1*S*)-1-methyl-3-phenoxypropoxy]-2*H*-pyran (548.5 mg, 2.19 mmol, 1 equiv) in dry EtOH (2 mL) was added. After addition, the mixture was heated to  $55^\circ\text{C}$  and kept stirring for 12 hours. Full consumption of the starting material was confirmed by TLC. The organic layers were concentrated *in vacuo*. Subsequent purification via a silical gel column chromatography afforded a colorless oil (306.9 mg, 83%) (Petroleum: EtOAc = 4:1,  $R_f = 0.5$ ).

**$^1\text{H NMR}$  (400 MHz,  $\text{CDCl}_3$ )**  $\delta$  7.33 – 7.24 (m, 2H), 7.00 – 6.88 (m, 3H), 4.22 – 4.04 (m, 3H), 2.16 (s, 1H), 1.97 – 1.88 (m, 2H), 1.27 (d,  $J = 6.2$  Hz, 3H).

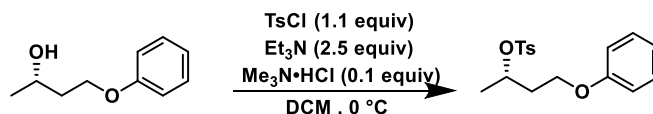

$\text{TsCl}$  (389.8 mg, 2 mmol, 1.1 equiv),  $\text{Me}_3\text{N}\cdot\text{HCl}$  (21.4 mg, 0.2 mmol, 0.1 equiv) and a magnetic stir bar were added to a 50 mL Schlenk bottle. The bottle was tightly sealed with the rubber

stoppers and was evaluated and backfilled with N<sub>2</sub> three times, then dry DCM (5 mL) and Et<sub>3</sub>N (0.7 mL, 4.6 mmol, 2.5 equiv) were added. The mixture was stirred for 5 min and cooled to 0 °C, then the solution of (2*S*)-4-phenoxy-2-butanol (306.9 mg, 1.83 mmol, 1 equiv) in dry DCM (5 mL) was added. After addition, the mixture was kept stirring for 2 hours at 0 °C. Full consumption of the starting material was confirmed by TLC. Water (10 mL) was added to the mixture and extracted with DCM (10 mL×3), the organic layers were dried over Na<sub>2</sub>SO<sub>4</sub> and concentrated *in vacuo*. Subsequent purification via a silical gel column chromatography afforded a white solid (364.9 mg, 62%, 98.5:1.5 *e.r.*, [α]<sub>D</sub><sup>22.2</sup> = 43.8 (c = 0.8, CHCl<sub>3</sub>)) (Petroleum: EtOAc = 8:1, R<sub>f</sub> = 0.5).

<sup>1</sup>H NMR (400 MHz, CDCl<sub>3</sub>) δ 7.73 (d, 2H), 7.28 – 7.19 (m, 2H), 7.12 (d, *J* = 8.0 Hz, 2H), 6.92 (t, *J* = 1.1 Hz, 1H), 6.70 – 6.63 (m, 2H), 4.93 – 4.81 (m, 1H), 3.86 – 3.77 (m, 1H), 3.70 – 3.60 (m, 1H), 2.27 (s, 3H), 2.08 – 1.91 (m, 2H), 1.44 (d, *J* = 6.3 Hz, 3H).

<sup>13</sup>C{<sup>1</sup>H} NMR (101 MHz, CDCl<sub>3</sub>) δ 158.34, 144.52, 133.79, 129.65, 129.27, 127.53, 120.69, 114.19, 77.25, 62.84, 36.18, 21.58, 21.53.

The NMR spectra are consistent with literature report.<sup>10</sup>

Chiral HPLC conditions: OJ column (10% *i*-PrOH/hexanes, flow rate 1.0 mL/min, 25 °C); retention time for chiral compound (Fig. S10): *t*<sub>1</sub> = 25.372 min (major), *t*<sub>2</sub> = 28.398 min (minor).

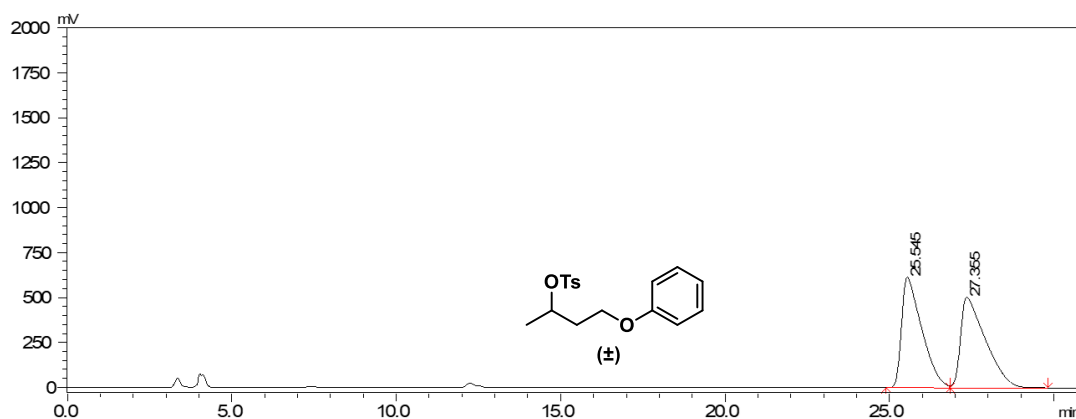

**Figure S9.** HPLC trace of 4-phenoxybutan-2-yl 4-methylbenzenesulfonate.

| #     | Ret Time (min) | Height (μV) | Area (μV.sec) | Area (%) |
|-------|----------------|-------------|---------------|----------|
| 1     | 25.545         | 614685      | 26234104      | 49.850   |
| 2     | 27.355         | 503957      | 26391817      | 50.150   |
| total |                | 1118641     | 52625921      | 100.000  |

**Table S7.** HPLC trace of 4-phenoxybutan-2-yl 4-methylbenzenesulfonate.

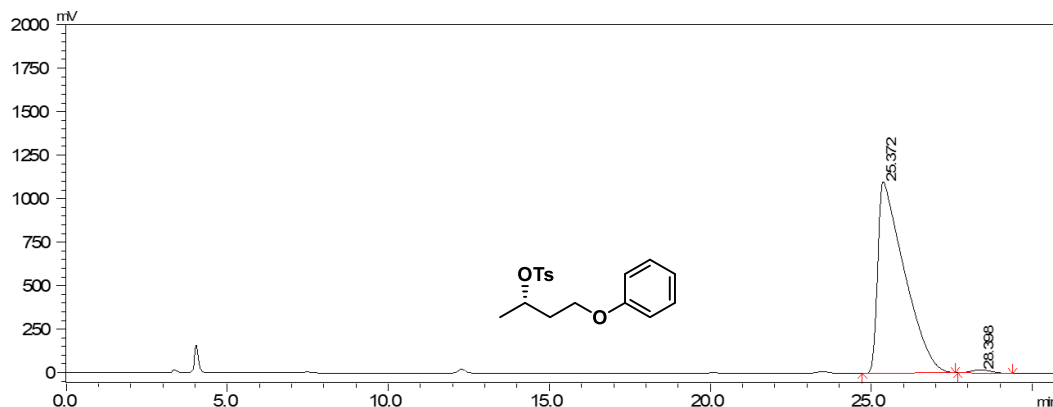

**Figure S10.** HPLC trace of (*S*)-4-phenoxybutan-2-yl 4-methylbenzenesulfonate.

| #     | Ret Time (min) | Height (μV) | Area (μV.sec) | Area (%) |
|-------|----------------|-------------|---------------|----------|
| 1     | 25.372         | 1100698     | 63045659      | 98.746   |
| 2     | 28.398         | 18762       | 800763        | 1.254    |
| total |                | 1119461     | 63846422      | 100.000  |

**Table S8.** HPLC trace of (*S*)-4-phenoxybutan-2-yl 4-methylbenzenesulfonate.

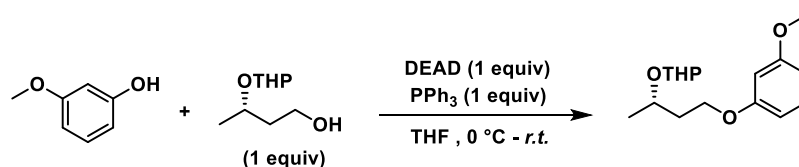

Guaiacol (498.4 mg, 4.0 mmol), PPh<sub>3</sub> (1047.5 mg, 4 mmol, 1 equiv) and a magnetic stir bar were added to a 50 mL Schlenk bottle. The bottle was tightly sealed with the rubber stoppers and was evacuated and backfilled with N<sub>2</sub> three times, then dry THF (4 mL) was added. The mixture was stirred for 5 min and cooled to 0 °C, then the solution of (*S*)-3-[(tetrahydro-2*H*-pyran-2-yl)oxy]-1-butanol (696.5 mg, 4 mmol, 1 equiv) in dry THF (2 mL) was added. The solution of DEAD (699.6 mg, 4 mmol, 1 equiv) in dry THF (2 mL) was added dropwise and the reaction was warmed to room temperature and stirred for 18 hours. Full consumption of the starting material was confirmed by TLC. Water (5 mL) was added to the mixture and extracted with EtOAc (5 mL×3), the organic layers were dried over Na<sub>2</sub>SO<sub>4</sub> and concentrated *in vacuo*. Subsequent purification via a silical gel column chromatography afforded a colorless oil (471.7 mg, 42%) (Petroleum: EtOAc = 9:1, R<sub>f</sub> = 0.83).

<sup>1</sup>H NMR (400 MHz, CDCl<sub>3</sub>) δ 7.21 – 7.11 (m, 2H), 6.56 – 6.42 (m, 6H), 4.78 – 4.71 (m, 1H), 4.66 – 4.59 (m, 1H), 4.13 – 3.88 (m, 7H), 3.82 – 3.74 (m, 7H), 3.54 – 3.39 (m, 2H), 2.05 – 1.87 (m, 4H), 1.87 – 1.74 (m, 2H), 1.76 – 1.62 (m, 2H), 1.61 – 1.42 (m, 8H), 1.31 (d, *J* = 6.3 Hz, 3H), 1.19 (d, *J* = 6.1 Hz, 3H).

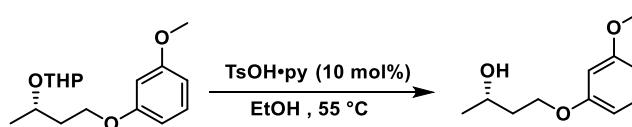

TsOH·py (59.1 mg, 0.2 mmol, 0.1 equiv) and a magnetic stir bar were added to a 50 mL

Schlenk bottle. The bottle was tightly sealed with the rubber stoppers and was evaluated and backfilled with N<sub>2</sub> three times, then dry EtOH (3 mL) was added. The mixture was stirred for 5 min, then the solution of 2-(((S)-4-(3-methoxyphenoxy)butan-2-yl)oxy)tetrahydro-2H-pyran (471.1 mg, 1.68 mmol, 1 equiv) in dry EtOH (2 mL) was added. After addition, the mixture was heated to 55 °C and kept stirring for 12 hours. Full consumption of the starting material was confirmed by TLC. The organic layers were concentrated *in vacuo*. Subsequent purification via a silical gel column chromatography afforded a colorless oil (247.3 mg, 77%) (Petroleum: EtOAc = 4:1, R<sub>f</sub> = 0.29).

**<sup>1</sup>H NMR (400 MHz, CDCl<sub>3</sub>)** δ 7.17 (t, *J* = 8.2 Hz, 1H), 6.54 – 6.49 (m, 2H), 6.48 – 6.45 (m, 1H), 4.19 – 4.03 (m, 3H), 3.78 (s, 3H), 2.22 (s, 1H), 1.95 – 1.87 (m, 2H), 1.26 (d, *J* = 6.3 Hz, 3H).

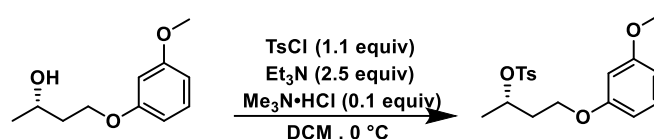

TsCl (303.0 mg, 1.43 mmol, 1.1 equiv), Me<sub>3</sub>N•HCl (12.9 mg, 0.13 mmol, 0.1 equiv) and a magnetic stir bar were added to a 50 mL Schlenk bottle. The bottle was tightly sealed with the rubber stoppers and was evaluated and backfilled with N<sub>2</sub> three times, then dry DCM (5 mL) and Et<sub>3</sub>N (0.5 mL, 3.25 mmol, 2.5 equiv) were added. The mixture was stirred for 5 min and cooled to 0 °C, then the solution of (2S)-4-(3-methoxyphenoxy)-2-butanol (247.3 mg, 1.3 mmol, 1 equiv) in dry DCM (5 mL) was added. After addition, the mixture was kept stirring for 2 hours at 0 °C. Full consumption of the starting material was confirmed by TLC. Water (10 mL) was added to the mixture and extracted with DCM (10 mL×3), the organic layers were dried over Na<sub>2</sub>SO<sub>4</sub> and concentrated *in vacuo*. Subsequent purification via a silical gel column chromatography afforded a white solid (246.4 mg, 54%, 98.5:1.5 *e.r.*, [α]<sub>D</sub><sup>22.1</sup> = 20.5 (c = 0.8, CHCl<sub>3</sub>)) (Petroleum: EtOAc = 8:1, R<sub>f</sub> = 0.27).

**<sup>1</sup>H NMR (400 MHz, CDCl<sub>3</sub>)** δ 7.73 (d, *J* = 7.9 Hz, 2H), 7.22 – 7.05 (m, 3H), 6.49 (d, *J* = 2.4 Hz, 1H), 6.28 (d, *J* = 2.4 Hz, 1H), 6.22 (s, 1H), 4.92 – 4.77 (m, 1H), 3.87 – 3.72 (m, 4H), 3.67 – 3.57 (m, 1H), 2.28 (s, 3H), 2.09 – 1.89 (m, 2H), 1.44 (d, *J* = 6.3 Hz, 3H).

**<sup>13</sup>C{<sup>1</sup>H} NMR (101 MHz, CDCl<sub>3</sub>)** δ 160.67, 159.62, 144.56, 133.78, 129.68, 129.66, 127.52, 106.50, 106.16, 100.74, 77.21, 62.97, 55.20, 36.13, 21.60, 21.47.

**HR-MS (EI)** for C<sub>18</sub>H<sub>22</sub>O<sub>5</sub>S [M] m/z [M]<sup>+</sup>: calculated: 350.1185 found: 350.1190

Chiral HPLC conditions: AD column (10% *i*-PrOH/hexanes, flow rate 1.0 mL/min, 25 °C); retention time for chiral compound (Fig. S12): *t*<sub>1</sub> = 9.830 min (major), *t*<sub>2</sub> = 10.858 min (minor).

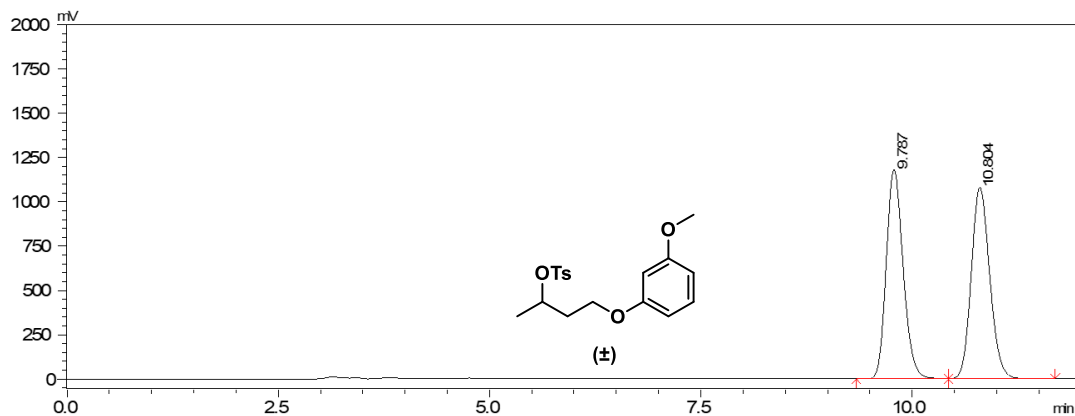

**Figure S11.** HPLC trace of 4-(3-methoxyphenoxy)butan-2-yl 4-methylbenzenesulfonate.

| #     | Ret Time (min) | Height ( $\mu\text{V}$ ) | Area ( $\mu\text{V}\cdot\text{sec}$ ) | Area (%) |
|-------|----------------|--------------------------|---------------------------------------|----------|
| 1     | 9.787          | 1180255                  | 16418597                              | 50.035   |
| 2     | 10.804         | 1078756                  | 16395476                              | 49.965   |
| total |                | 2259011                  | 32814073                              | 100.000  |

**Table S9.** HPLC trace of 4-(3-methoxyphenoxy)butan-2-yl 4-methylbenzenesulfonate.

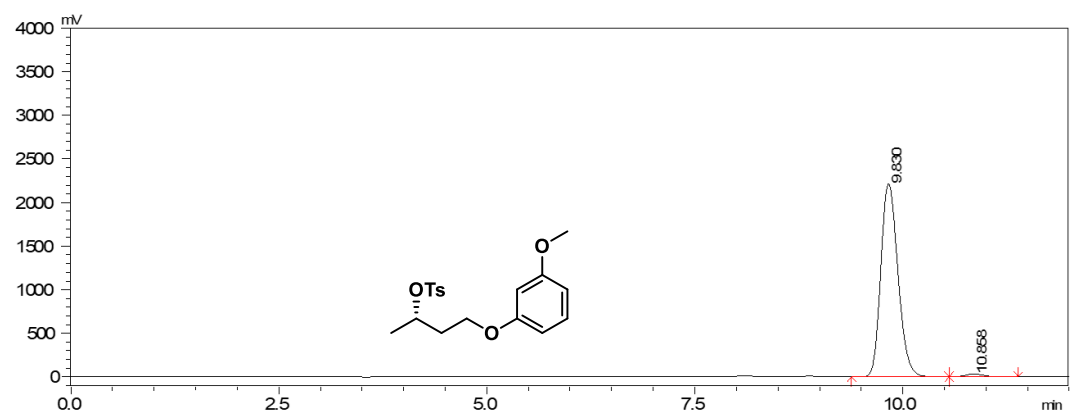

**Figure S12.** HPLC trace of (*S*)-4-(3-methoxyphenoxy)butan-2-yl 4-methylbenzenesulfonate.

| #     | Ret Time (min) | Height ( $\mu\text{V}$ ) | Area ( $\mu\text{V}\cdot\text{sec}$ ) | Area (%) |
|-------|----------------|--------------------------|---------------------------------------|----------|
| 1     | 9.830          | 2215863                  | 31806574                              | 98.414   |
| 2     | 10.858         | 33549                    | 512705                                | 1.586    |
| total |                | 2249412                  | 32319279                              | 100.000  |

**Table S10.** HPLC trace of (*S*)-4-(3-methoxyphenoxy)butan-2-yl 4-methylbenzenesulfonate.

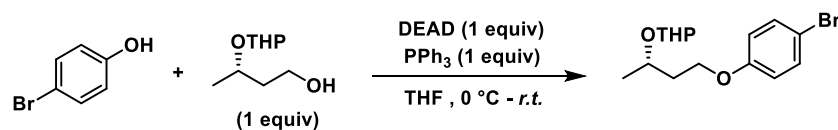

4-Bromophenol (569.7 mg, 3.12 mmol),  $\text{PPh}_3$  (802.5 mg, 3.12 mmol, 1 equiv) and a magnetic stir bar were added to a 50 mL Schlenk bottle. The bottle was tightly sealed with the rubber

stoppers and was evaluated and backfilled with N<sub>2</sub> three times, then dry THF (4 mL) was added. The mixture was stirred for 5 min and cooled to 0 °C, then the solution of (3*S*)-3-[(tetrahydro-2*H*-pyran-2-yl)oxy]-1-butanol (543.4 mg, 3.12 mmol, 1 equiv) in dry THF (2 mL) was added. The solution of DEAD (551.3 mg, 3.12 mmol, 1 equiv) in dry THF (2 mL) was added dropwise and the reaction was warmed to room temperature and stirred for 18 hours. Full consumption of the starting material was confirmed by TLC. Water (5 mL) was added to the mixture and extracted with EtOAc (5 mL×3), the organic layers were dried over Na<sub>2</sub>SO<sub>4</sub> and concentrated *in vacuo*. Subsequent purification via a silical gel column chromatography afforded a colorless oil (593.3 mg, 58%) (Petroleum: EtOAc = 9:1, R<sub>f</sub> = 0.83).

<sup>1</sup>H NMR (400 MHz, CDCl<sub>3</sub>) δ 7.38 – 7.31 (m, 4H), 6.80 – 6.73 (m, 4H), 4.73 – 4.69 (m, 1H), 4.63 – 4.57 (m, 1H), 4.08 – 3.88 (m, 7H), 3.80 – 3.71 (m, 1H), 3.52 – 3.37 (m, 2H), 1.99 – 1.86 (m, 4H), 1.84 – 1.60 (m, 4H), 1.58 – 1.41 (m, 8H), 1.30 (d, *J* = 6.3 Hz, 3H), 1.18 (d, *J* = 6.2 Hz, 3H).

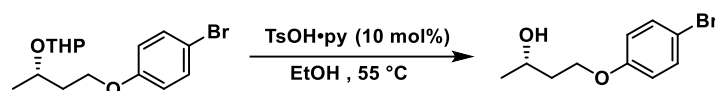

TsOH·py (59.3 mg, 0.2 mmol, 0.1 equiv) and a magnetic stir bar were added to a 50 mL Schlenk bottle. The bottle was tightly sealed with the rubber stoppers and was evaluated and backfilled with N<sub>2</sub> three times, then dry EtOH (3 mL) was added. The mixture was stirred for 5 min, then the solution of 2-(((*S*)-4-(4-bromophenoxy)butan-2-yl)oxy)tetrahydro-2*H*-pyran (593.3 mg, 1.8 mmol, 1 equiv) in dry EtOH (2 mL) was added. After addition, the mixture was heated to 55 °C and kept stirring for 12 hours. Full consumption of the starting material was confirmed by TLC. the organic layers were concentrated *in vacuo*. Subsequent purification via a silical gel column chromatography afforded a colorless oil (374.0 mg, 85%) (Petroleum: EtOAc = 4:1, R<sub>f</sub> = 0.29).

<sup>1</sup>H NMR (400 MHz, CDCl<sub>3</sub>) δ 7.40 – 7.33 (m, 2H), 6.82 – 6.75 (m, 2H), 4.17 – 4.02 (m, 3H), 1.97 – 1.83 (m, 3H), 1.27 (d, *J* = 6.2 Hz, 3H).

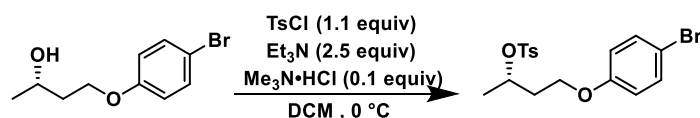

TsCl (324.8 mg, 1.68 mmol, 1.1 equiv), Me<sub>3</sub>N·HCl (14.8 mg, 0.15 mmol, 0.1 equiv) and a magnetic stir bar were added to a 50 mL Schlenk bottle. The bottle was tightly sealed with the rubber stoppers and was evaluated and backfilled with N<sub>2</sub> three times, then dry DCM (5 mL) and Et<sub>3</sub>N (0.54 mL, 3.83 mmol, 2.5 equiv) were added. The mixture was stirred for 5 min and cooled to 0 °C, then the solution of (2*S*)-4-(4-bromophenoxy)-2-butanol (374.0 mg, 1.53 mmol, 1 equiv) in dry DCM (5 mL) was added. After addition, the mixture was kept stirring for 2 hours at 0 °C. Full consumption of the starting material was confirmed by TLC. Water (10 mL) was added to the mixture and extracted with DCM (10 mL×3), the organic layers were dried over Na<sub>2</sub>SO<sub>4</sub> and concentrated *in vacuo*. Subsequent purification via a silical gel column chromatography afforded a white solid (347.3 mg, 57%, 98.5:1.5 *e.r.*, [α]<sub>D</sub><sup>22.1</sup> = 3.8 (c = 0.4, CHCl<sub>3</sub>)) (Petroleum: EtOAc = 8:1, R<sub>f</sub> = 0.27).

<sup>1</sup>H NMR (400 MHz, CDCl<sub>3</sub>) δ 7.73 – 7.70 (m, 2H), 7.34 – 7.28 (m, 2H), 7.13 – 7.11 (m, 2H),

6.56 – 6.51 (m, 2H), 4.90 – 4.79 (m, 1H), 3.80 – 3.73 (m, 1H), 3.64 – 3.57 (m, 1H), 2.28 (s, 3H), 2.06 – 1.90 (m, 2H), 1.44 (d,  $J = 6.3$  Hz, 3H).

$^{13}\text{C}\{^1\text{H}\}$  NMR (101 MHz,  $\text{CDCl}_3$ )  $\delta$  157.48, 144.60, 133.78, 132.09, 129.69, 127.55, 115.99, 112.89, 76.98, 63.20, 36.10, 21.69, 21.61.

HR-MS (EI) for  $\text{C}_{17}\text{H}_{19}^{79}\text{BrO}_4\text{S}$  [M]  $m/z$  [M] $^+$ : calculated: 398.0187 found: 398.0189

Chiral HPLC conditions: IB column (5% EtOH/hexanes, flow rate 1.0 mL/min, 25 °C); retention time for chiral compound (Fig. S14):  $t_1 = 8.631$  min (major),  $t_2 = 9.402$  min (minor).

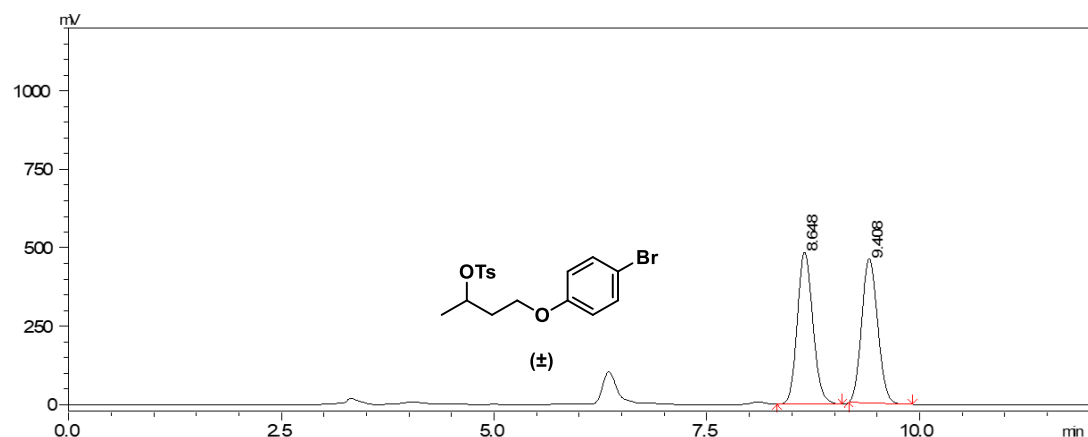

**Figure S13.** HPLC trace of 4-(4-bromophenoxy)butan-2-yl 4-methylbenzenesulfonate.

| #     | Ret Time (min) | Height ( $\mu\text{V}$ ) | Area ( $\mu\text{V}\cdot\text{sec}$ ) | Area (%) |
|-------|----------------|--------------------------|---------------------------------------|----------|
| 1     | 8.648          | 484516                   | 6173689                               | 50.603   |
| 2     | 9.408          | 460937                   | 6026498                               | 49.397   |
| total |                | 945453                   | 12200187                              | 100.000  |

**Table S11.** HPLC trace of 4-(4-bromophenoxy)butan-2-yl 4-methylbenzenesulfonate.

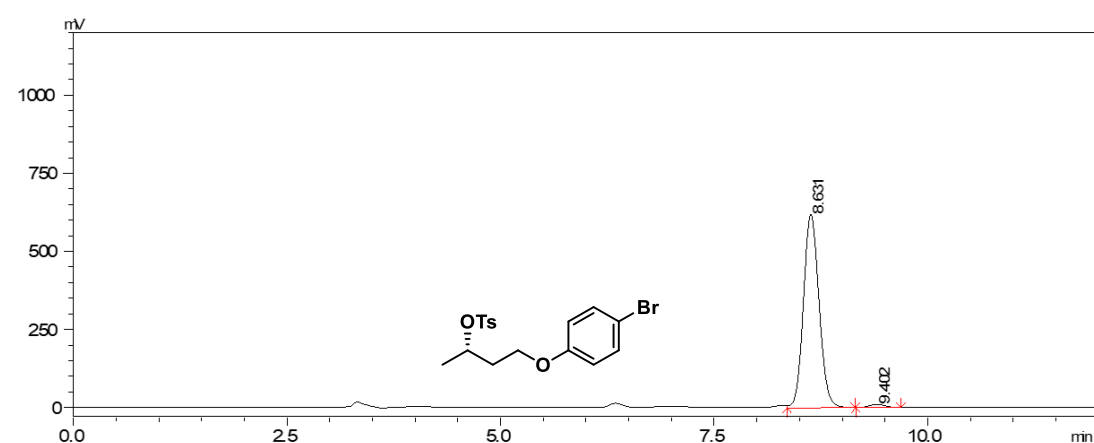

**Figure S14.** HPLC trace of (*S*)-4-(4-bromophenoxy)butan-2-yl 4-methylbenzenesulfonate.

| #     | Ret Time (min) | Height ( $\mu\text{V}$ ) | Area ( $\mu\text{V}\cdot\text{sec}$ ) | Area (%) |
|-------|----------------|--------------------------|---------------------------------------|----------|
| 1     | 8.631          | 619175                   | 7883269                               | 98.409   |
| 2     | 9.402          | 10085                    | 127453                                | 1.591    |
| total |                | 629261                   | 8010721                               | 100.000  |

**Table S12.** HPLC trace of (*S*)-4-(4-bromophenoxy)butan-2-yl 4-methylbenzenesulfonate.

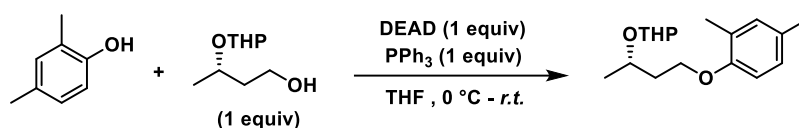

2,4-Dimethylphenol (696.0 mg, 5 mmol), PPh<sub>3</sub> (1322.8 mg, 5 mmol, 1 equiv) and a magnetic stir bar were added to a 50 mL Schlenk bottle. The bottle was tightly sealed with the rubber stoppers and was evacuated and backfilled with N<sub>2</sub> three times, then dry THF (6 mL) was added. The mixture was stirred for 5 min and cooled to 0 °C, then the solution of (3*S*)-3-[(tetrahydro-2*H*-pyran-2-yl)oxy]-1-butanol (870.7 mg, 5 mmol, 1 equiv) in dry THF (2 mL) was added. The solution of DEAD (873.5 mg, 5 mmol, 1 equiv) in dry THF (2 mL) was added dropwise and the reaction was warmed to room temperature and stirred for 12 hours. Full consumption of the starting material was confirmed by TLC. Water (5 mL) was added to the mixture and extracted with EtOAc (5 mL×3), the organic layers were dried over Na<sub>2</sub>SO<sub>4</sub> and concentrated *in vacuo*. Subsequent purification via a silical gel column chromatography afforded a colorless oil (490.3 mg, 35%) (Petroleum: EtOAc = 20:1, R<sub>f</sub> = 0.25).

<sup>1</sup>H NMR (400 MHz, CDCl<sub>3</sub>) δ 6.89 – 6.81 (m, 4H), 6.67 – 6.60 (m, 2H), 4.70 – 4.65 (m, 1H), 4.57 – 4.52 (m, 1H), 4.07 – 3.81 (m, 7H), 3.75 – 3.66 (m, 1H), 3.44 – 3.31 (m, 2H), 2.17 (s, 6H), 2.11 (s, 6H), 1.96 – 1.81 (m, 4H), 1.78 – 1.67 (m, 2H), 1.66 – 1.54 (m, 2H), 1.53 – 1.33 (m, 8H), 1.24 (d, *J* = 6.3 Hz, 3H), 1.12 (d, *J* = 6.2 Hz, 3H).

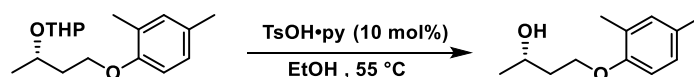

TsOH·py (50.9 mg, 0.2 mmol, 0.1 equiv) and a magnetic stir bar were added to a 50 mL Schlenk bottle. The bottle was tightly sealed with the rubber stoppers, then dry EtOH (3 mL) was added. The mixture was stirred for 5 min, then the solution of 2-(((*S*)-4-(2,4-dimethylphenoxy)butan-2-yl)oxy)tetrahydro-2*H*-pyran (490.3 mg, 1.8 mmol, 1 equiv) in dry EtOH (2 mL) was added. After addition, the mixture was heated to 55 °C and kept stirring for 12 hours. Full consumption of the starting material was confirmed by TLC. The organic layers were concentrated *in vacuo*. Subsequent purification via a silical gel column chromatography afforded a colorless oil (292.9 mg, 84%) (Petroleum: EtOAc = 6:1, R<sub>f</sub> = 0.31).

<sup>1</sup>H NMR (400 MHz, CDCl<sub>3</sub>) δ 7.00 – 6.92 (m, 2H), 6.74 (d, *J* = 7.9 Hz, 1H), 4.21 – 4.03 (m, 3H), 2.43 (s, 1H), 2.27 (s, 3H), 2.20 (s, 3H), 2.00 – 1.90 (m, 2H), 1.28 (d, *J* = 6.2 Hz, 3H).

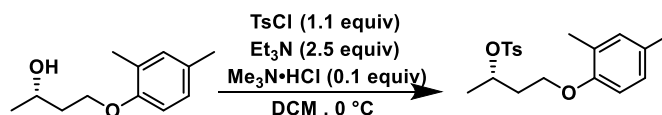

TsCl (221.2 mg, 1.16 mmol, 1.1 equiv), Me<sub>3</sub>N·HCl (9.5 mg, 0.11 mmol, 0.1 equiv) and a magnetic stir bar were added to a 50 mL Schlenk bottle. The bottle was tightly sealed with the rubber stoppers and was evacuated and backfilled with N<sub>2</sub> three times, then dry DCM (5 mL) and Et<sub>3</sub>N (0.4 mL, 2.6 mmol, 2.5 equiv) were added. The mixture was stirred for 5 min and cooled to 0 °C, then the solution of (2*S*)-4-(2,4-dimethylphenoxy)-2-butanol (292.9 mg, 1.05 mmol, 1 equiv) in dry DCM (5 mL) was added. After addition, the mixture was kept stirring for 2 hours at 0 °C. Full consumption of the starting material was confirmed by TLC. Water (10 mL) was added to the mixture and extracted with DCM (10 mL×3), the organic layers were



dried over Na<sub>2</sub>SO<sub>4</sub> and concentrated *in vacuo*. Subsequent purification via a silical gel column chromatography afforded a white solid (209.5 mg, 57%, 98.5:1.5 *e.r.*, [ $\alpha$ ]<sub>D</sub><sup>22.5</sup> = 16.7 (c = 0.4, CHCl<sub>3</sub>)) (Petroleum: EtOAc = 8:1, R<sub>f</sub> = 0.42).

<sup>1</sup>H NMR (400 MHz, CDCl<sub>3</sub>)  $\delta$  7.71 (d, *J* = 8.3 Hz, 2H), 7.10 (d, *J* = 8.1 Hz, 2H), 6.91 (d, *J* = 2.3 Hz, 1H), 6.88 – 6.84 (m, 1H), 6.41 (d, *J* = 8.1 Hz, 1H), 4.92 – 4.82 (m, 1H), 3.81 – 3.73 (m, 1H), 3.66 – 3.58 (m, 1H), 2.26 (s, 6H), 2.06 (s, 3H), 2.04 – 1.92 (m, 2H), 1.46 (d, *J* = 6.3 Hz, 3H).

<sup>13</sup>C{<sup>1</sup>H} NMR (101 MHz, CDCl<sub>3</sub>)  $\delta$  154.28, 144.42, 133.76, 131.32, 129.59, 129.32, 127.44, 126.73, 126.06, 110.25, 77.34, 62.81, 36.36, 21.59, 21.47, 20.38, 16.04.

HR-MS (EI) for C<sub>19</sub>H<sub>24</sub>O<sub>4</sub>S [M] *m/z* [M]<sup>+</sup>: calculated: 348.1395 found: 348.1393

Chiral HPLC conditions: OJ column (10% *i*-PrOH/hexanes, flow rate 1.0 mL/min, 25 °C); retention time for chiral compound (Fig. S16): *t*<sub>1</sub> = 14.655 min (major), *t*<sub>2</sub> = 19.612 min (minor).

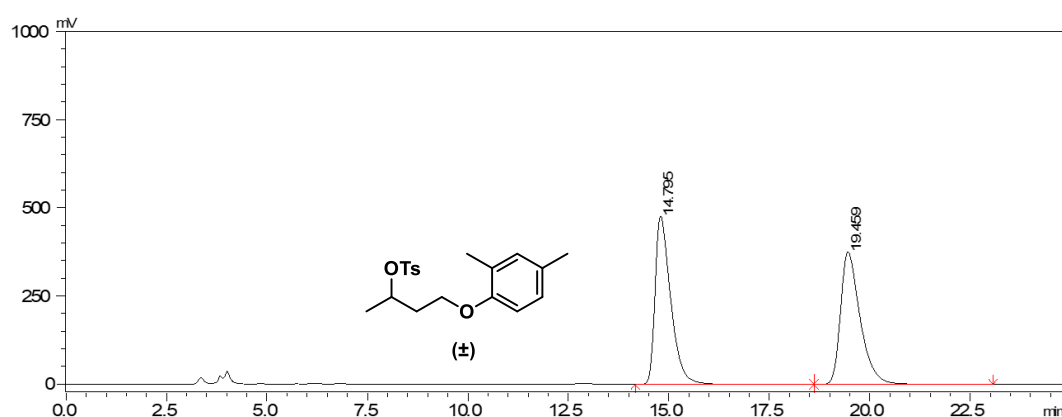

**Figure S15.** HPLC trace of 4-(2,4-dimethylphenoxy)butan-2-yl 4-methylbenzenesulfonate.

| #     | Ret Time (min) | Height ( $\mu$ V) | Area ( $\mu$ V.sec) | Area (%) |
|-------|----------------|-------------------|---------------------|----------|
| 1     | 14.795         | 477437            | 12912989            | 50.268   |
| 2     | 19.459         | 375509            | 12775303            | 49.732   |
| total |                | 852946            | 25688292            | 100.000  |

**Table S13.** HPLC trace of 4-(2,4-dimethylphenoxy)butan-2-yl 4-methylbenzenesulfonate.

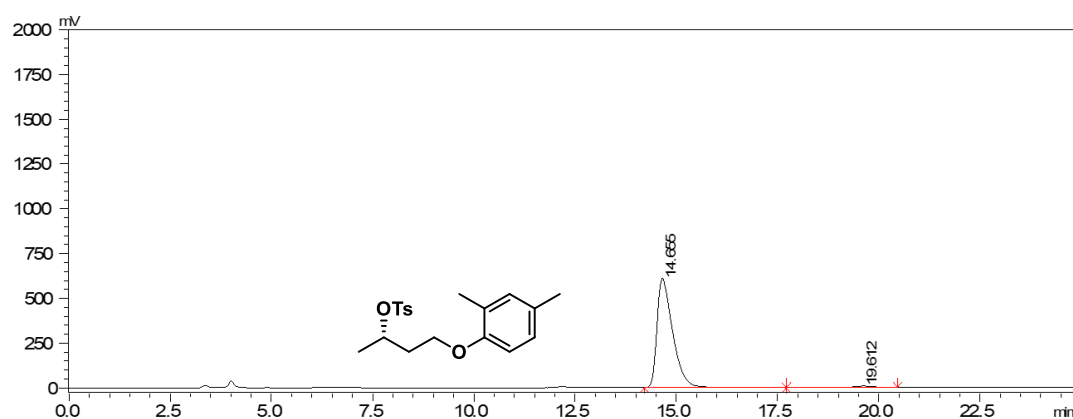

**Figure S16.** HPLC trace of (*S*)-4-(2,4-dimethylphenoxy)butan-2-yl 4-methylbenzenesulfonate.

| #     | Ret Time (min) | Height ( $\mu\text{V}$ ) | Area ( $\mu\text{V}\cdot\text{sec}$ ) | Area (%) |
|-------|----------------|--------------------------|---------------------------------------|----------|
| 1     | 14.655         | 609104                   | 16340704                              | 98.493   |
| 2     | 19.612         | 7910                     | 250098                                | 1.507    |
| total |                | 617014                   | 16590802                              | 100.000  |

**Table S14.** HPLC trace of (*S*)-4-(2,4-dimethylphenoxy)butan-2-yl 4-methylbenzenesulfonate.

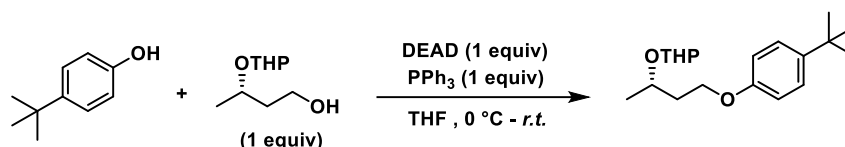

4-Tert-butylphenol (760.6 mg, 5 mmol),  $\text{PPh}_3$  (1306.3 mg, 5 mmol, 1 equiv) and a magnetic stir bar were added to a 50 mL Schlenk bottle. The bottle was tightly sealed with the rubber stoppers and was evacuated and backfilled with  $\text{N}_2$  three times, then dry THF (6 mL) was added. The mixture was stirred for 5 min and cooled to 0 °C, then the solution of (3*S*)-3-[(tetrahydro-2*H*-pyran-2-yl)oxy]-1-butanol (870.7 mg, 5 mmol, 1 equiv) in dry THF (2 mL) was added. The solution of DEAD (873.5 mg, 5 mmol, 1 equiv) in dry THF (2 mL) was added dropwise and the reaction was warmed to room temperature and stirred for 12 hours. Full consumption of the starting material was confirmed by TLC. Water (5 mL) was added to the mixture and extracted with EtOAc (5 mL $\times$ 3), the organic layers were dried over  $\text{Na}_2\text{SO}_4$  and concentrated *in vacuo*. Subsequent purification via a silical gel column chromatography afforded a colorless oil (464.3 mg, 30%) (Petroleum: EtOAc = 20:1,  $R_f$  = 0.25).

$^1\text{H NMR}$  (400 MHz,  $\text{CDCl}_3$ )  $\delta$  7.33 – 7.27 (m, 4H), 6.88 – 6.81 (m, 4H), 4.79 – 4.72 (m, 1H), 4.68 – 4.59 (m, 1H), 4.11 – 3.90 (m, 7H), 3.85 – 3.78 (m, 1H), 3.55 – 3.41 (m, 2H), 2.04 – 1.89 (m, 4H), 1.86 – 1.77 (m, 2H), 1.73 – 1.62 (m, 2H), 1.60 – 1.42 (m, 8H), 1.33 – 1.29 (m, 21H), 1.19 (d,  $J$  = 6.1 Hz, 3H).

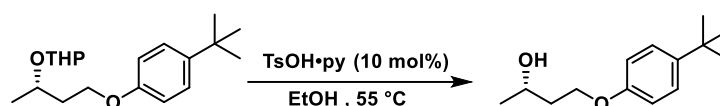

$\text{TsOH}\cdot\text{py}$  (57.0 mg, 0.2 mmol, 0.1 equiv) and a magnetic stir bar were added to a 50 mL Schlenk bottle. The bottle was tightly sealed with the rubber stoppers, then dry EtOH (3 mL) was added. The mixture was stirred for 5 min, then the solution of 2-(((*S*)-4-(4-(tert-butyl)phenoxy)butan-2-yl)oxy)tetrahydro-2*H*-pyran (464.3 mg, 1.5 mmol, 1 equiv) in dry EtOH (3 mL) was added. After addition, the mixture was heated to 55 °C and kept stirring for 12 hours. Full consumption of the starting material was confirmed by TLC. The organic layers were concentrated *in vacuo*. Subsequent purification via a silical gel column chromatography afforded a colorless oil (250.3 mg, 75%) (Petroleum: EtOAc = 6:1,  $R_f$  = 0.34).

$^1\text{H NMR}$  (400 MHz,  $\text{CDCl}_3$ )  $\delta$  7.34 – 7.27 (m, 2H), 6.89 – 6.82 (m, 2H), 4.20 – 4.05 (m, 3H), 2.15 (d,  $J$  = 3.8 Hz, 1H), 1.96 – 1.88 (m, 2H), 1.30 (s, 9H), 1.27 (d,  $J$  = 6.2 Hz, 3H).

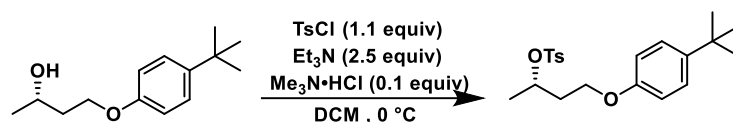

TsCl (167.6 mg, 0.9 mmol, 1.1 equiv), Me<sub>3</sub>N·HCl (9.1 mg, 0.08 mmol, 0.1 equiv) and a magnetic stir bar were added to a 50 mL Schlenk bottle. The bottle was tightly sealed with the rubber stoppers and was evacuated and backfilled with N<sub>2</sub> three times, then dry DCM (5 mL) and Et<sub>3</sub>N (0.3 mL, 2.1 mmol, 2.5 equiv) were added. The mixture was stirred for 5 min and cooled to 0 °C, then the solution of (2*S*)-4-[4-(1,1-dimethylethyl)phenoxy]-2-butanol (250.3 mg, 0.8 mmol, 1 equiv) in dry DCM (5 mL) was added. After addition, the mixture was kept stirring for 2 hours at 0 °C. Full consumption of the starting material was confirmed by TLC. Water (10 mL) was added to the mixture and extracted with DCM (10 mL×3), the organic layers were dried over Na<sub>2</sub>SO<sub>4</sub> and concentrated *in vacuo*. Subsequent purification via a silical gel column chromatography afforded a white solid (192.3 mg, 63%, 98:2 *e.r.*, [α]<sub>D</sub><sup>22.5</sup> = 21.7 (c = 0.4, CHCl<sub>3</sub>)) (Petroleum: EtOAc = 8:1, R<sub>f</sub> = 0.37).

<sup>1</sup>H NMR (400 MHz, CDCl<sub>3</sub>) δ 7.75 – 7.72 (m, 2H), 7.27 – 7.23 (m, 2H), 7.12 (d, *J* = 8.1 Hz, 2H), 6.62 – 6.59 (m, 2H), 4.91 – 4.83 (m, 1H), 3.80 – 3.75 (m, 1H), 3.65 – 3.59 (m, 1H), 2.26 (s, 3H), 2.05 – 1.90 (m, 2H), 1.43 (d, *J* = 6.3 Hz, 3H), 1.30 (s, 9H).

<sup>13</sup>C{<sup>1</sup>H} NMR (101 MHz, CDCl<sub>3</sub>) δ 156.11, 144.46, 143.27, 133.79, 129.65, 127.57, 126.04, 113.62, 77.35, 62.87, 36.23, 34.03, 31.52, 21.58.

HR-MS (EI) for C<sub>21</sub>H<sub>28</sub>O<sub>4</sub>S [M] *m/z* [M]<sup>+</sup>: calculated: 376.1708 found: 376.1711

Chiral HPLC conditions: AD column (5% EtOH/hexanes, flow rate 1.0 mL/min, 25 °C); retention time for chiral compound (Fig. S18): *t*<sub>1</sub> = 8.547 min (major), *t*<sub>2</sub> = 9.681 min (minor).

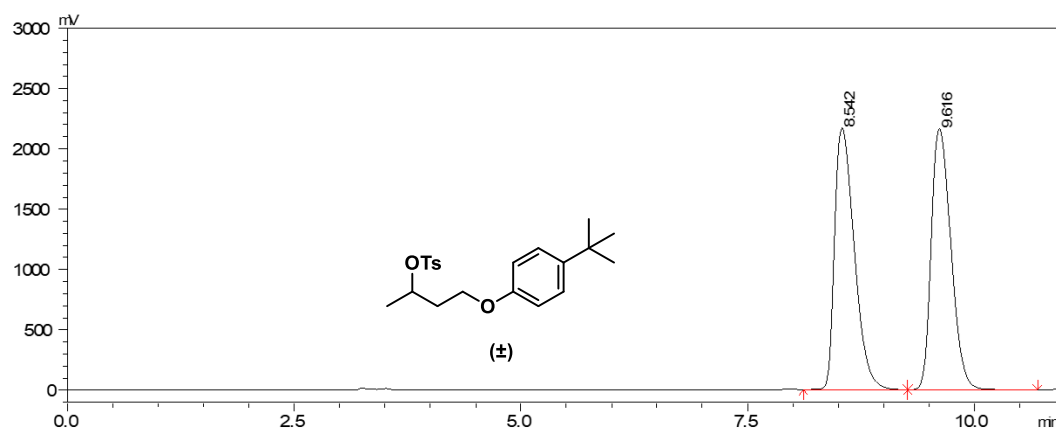

**Figure S17.** HPLC trace of 4-(4-(tert-butyl)phenoxy)butan-2-yl 4-methylbenzenesulfonate.

| #     | Ret Time (min) | Height (μV) | Area (μV.sec) | Area (%) |
|-------|----------------|-------------|---------------|----------|
| 1     | 8.542          | 2169145     | 32879595      | 50.066   |
| 2     | 9.616          | 2164333     | 32792949      | 49.934   |
| total |                | 4333478     | 65672544      | 100.000  |

**Table S15.** HPLC trace of 4-(4-(tert-butyl)phenoxy)butan-2-yl 4-methylbenzenesulfonate.

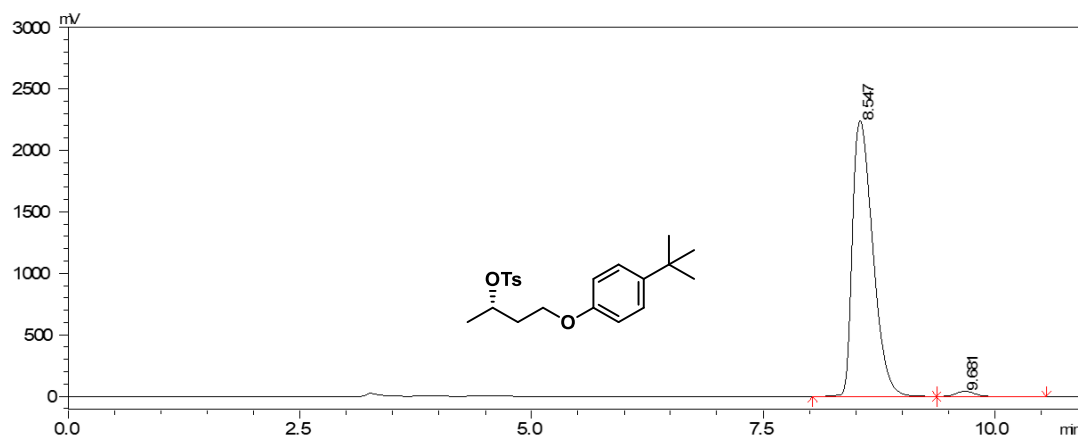

**Figure S18.** HPLC trace of (*S*)-4-(4-(tert-butyl)phenoxy)butan-2-yl 4-methylbenzenesulfonate.

| #     | Ret Time (min) | Height ( $\mu\text{V}$ ) | Area ( $\mu\text{V}\cdot\text{sec}$ ) | Area (%) |
|-------|----------------|--------------------------|---------------------------------------|----------|
| 1     | 8.547          | 2243723                  | 34491369                              | 98.164   |
| 2     | 9.681          | 43907                    | 645109                                | 1.836    |
| total |                | 2287630                  | 35136478                              | 100.000  |

**Table S16.** HPLC trace of (*S*)-4-(4-(tert-butyl)phenoxy)butan-2-yl 4-methylbenzenesulfonate.

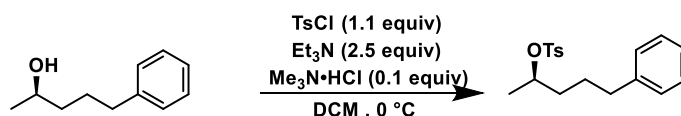

TsCl (210.8 mg, 1.1 mmol, 1.1 equiv),  $\text{Me}_3\text{N}\cdot\text{HCl}$  (10.8 mg, 0.1 mmol, 0.1 equiv) and a magnetic stir bar were added to a 50 mL Schlenk bottle. The bottle was tightly sealed with the rubber stoppers and was evacuated and backfilled with  $\text{N}_2$  three times, then dry DCM (5 mL) and  $\text{Et}_3\text{N}$  (0.4 mL, 2.5 mmol, 2.5 equiv) were added. The mixture was stirred for 5 min and cooled to  $0\text{ }^\circ\text{C}$ , then the solution of (*R*)-5-phenylpentan-2-ol (151.4 mg, 1 mmol, 1 equiv) in dry DCM (5 mL) was added. After addition, the mixture was kept stirring for 2 hours at  $0\text{ }^\circ\text{C}$ . Full consumption of the starting material was confirmed by TLC. Water (10 mL) was added to the mixture and extracted with DCM (10 mL $\times$ 3), the organic layers were dried over  $\text{Na}_2\text{SO}_4$  and concentrated *in vacuo*. Subsequent purification via a silical gel column chromatography afforded a white solid (146.2 mg, 46%, >99:1 *er.*,  $[\alpha]_{\text{D}}^{22.6} = 0.7$  ( $c = 0.8$ ,  $\text{CHCl}_3$ )) (Petroleum: EtOAc = 16:1,  $R_f = 0.26$ ).

$^1\text{H NMR}$  (400 MHz,  $\text{CDCl}_3$ )  $\delta$  7.81 (d,  $J = 7.9$  Hz, 2H), 7.34 (d,  $J = 8.0$  Hz, 2H), 7.29 – 7.23 (m, 2H), 7.19 (d,  $J = 7.2$  Hz, 1H), 7.07 (d,  $J = 7.4$  Hz, 2H), 4.72 – 4.60 (m, 1H), 2.69 – 2.57 (m, 1H), 2.55 – 2.48 (m, 1H), 2.46 (s, 3H), 2.01 – 1.89 (m, 1H), 1.87 – 1.76 (m, 1H), 1.31 (d,  $J = 6.3$  Hz, 3H).

$^{13}\text{C}\{^1\text{H}\}$  NMR (101 MHz,  $\text{CDCl}_3$ )  $\delta$  144.47, 140.80, 134.47, 129.74, 128.41, 128.23, 127.70, 126.01, 79.84, 38.12, 31.13, 21.60, 20.82.

The NMR spectra are consistent with literature report.<sup>10</sup>

Chiral HPLC conditions: OJ column (10% EtOH/hexanes, flow rate 1.0 mL/min,  $25\text{ }^\circ\text{C}$ ); retention time for chiral compound (Fig. S20):  $t_1 = 17.197$  min (major),  $t_2 = 20.481$  min (minor).

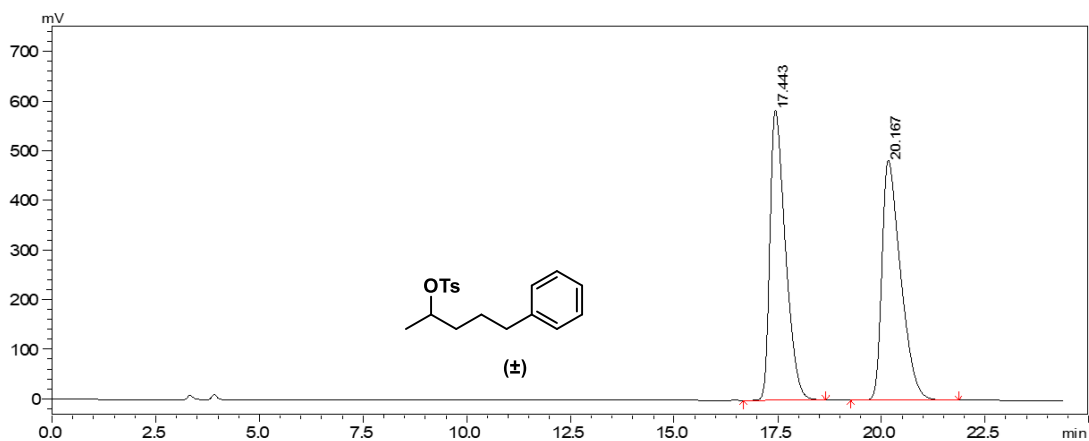

**Figure S19.** HPLC trace of 5-phenylpentan-2-yl 4-methylbenzenesulfonate.

| #     | Ret Time (min) | Height ( $\mu\text{V}$ ) | Area ( $\mu\text{V}\cdot\text{sec}$ ) | Area (%) |
|-------|----------------|--------------------------|---------------------------------------|----------|
| 1     | 17.443         | 584602                   | 15131184                              | 50.007   |
| 2     | 20.167         | 483315                   | 15127216                              | 49.993   |
| total |                | 1067917                  | 30258401                              | 100.000  |

**Table S17.** HPLC trace of 5-phenylpentan-2-yl 4-methylbenzenesulfonate.

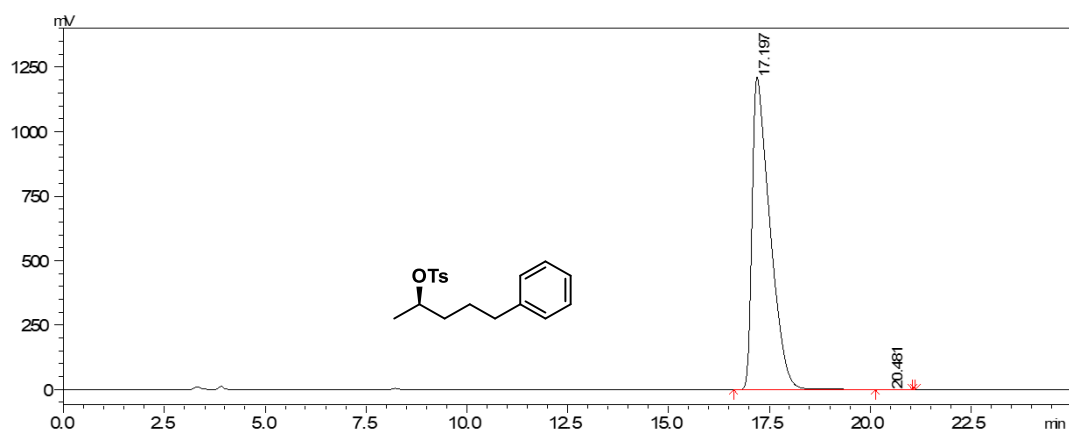

**Figure S20.** HPLC trace of (*R*)-5-phenylpentan-2-yl 4-methylbenzenesulfonate.

| #     | Ret Time (min) | Height ( $\mu\text{V}$ ) | Area ( $\mu\text{V}\cdot\text{sec}$ ) | Area (%) |
|-------|----------------|--------------------------|---------------------------------------|----------|
| 1     | 17.197         | 1212741                  | 37205342                              | 99.975   |
| 2     | 20.481         | 358                      | 9294                                  | 0.025    |
| total |                | 1213099                  | 37214636                              | 100.000  |

**Table S18.** HPLC trace of (*R*)-5-phenylpentan-2-yl 4-methylbenzenesulfonate.

7. Reaction procedures for the nucleophilic substitutions and electrochemical deconstruction of alkyl substituted hexaborate clusters, and product characterization data

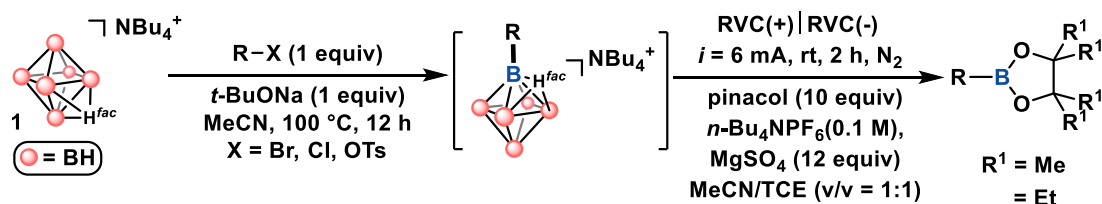

**Method A (Electrolysis set up 1, ElectraSyn 2.0):** To a 10 mL oven dried Schlenk tube equipped with a magnetic stir bar, *n*-Bu<sub>4</sub>N(B<sub>6</sub>H<sub>7</sub>) (**1**) (62.4 mg, 0.2 mmol, 1 equiv), and *t*-BuONa (19.2 mg, 0.2 mmol, 1 equiv) were added sequentially. The tube was evacuated and backfilled with N<sub>2</sub> three times. Dry MeCN (1 mL) was added via syringe. Then the solution of benzyl bromides or alkyl bromides (0.2 mmol, 1 equiv) in dry MeCN (1 mL) was added. The mixture was then magnetically stirred while being heated in oil bath at 100 °C for 12 hours. Then the heating bath was removed and the flask was cooled down to room temperature. The solvent was removed *in vacuo* and resulting oil was washed with hexane (3 mL×3), from <sup>11</sup>B NMR the conversion could be determined. To a 5 mL electrochemical reaction cell equipped with a magnetic stir bar, pinacol (236.3 mg, 2 mmol, 10 equiv), MgSO<sub>4</sub> (288.9 mg, 2.4 mmol, 12 equiv), and TBAPF<sub>6</sub> (116.3 mg, 0.3 mmol, 0.1 M) were added sequentially. The cell was evacuated and backfilled with N<sub>2</sub> three times. Dry MeCN (1.5 mL) was added. Then the solution of the crude product of the substituted cluster in dry TCE (1.5 mL) was added. The undivided cell was equipped with RVC (3.5 mm×0.5 mm×0.4 mm) as the anode and RVC (3.5 mm×0.5 mm×0.4 mm) as the cathode and then backfilled with N<sub>2</sub> to replace air atmosphere. The mixture was pre-stirred for five minutes, and then the reaction mixture was electrolyzed at a constant current of 6 mA until passing 2.20 F/mol of total charge (2 hours) at room temperature. The solvent was removed under reduced pressure and the residual solids were extracted with ethyl acetate (10 mL). The extract was concentrated and subjected to column separation to give the alkyl boronic ester products.

**Method B (Electrolysis set up 1, ElectraSyn 2.0):** To a 10 mL oven dried Schlenk tube equipped with a magnetic stir bar, *n*-Bu<sub>4</sub>N(B<sub>6</sub>H<sub>7</sub>) (**1**) (62.4 mg, 0.2 mmol, 1 equiv), and *t*-BuONa (19.2 mg, 0.2 mmol, 1 equiv) were added sequentially. The tube was evacuated and backfilled with N<sub>2</sub> three times. Dry MeCN (1 mL) was added via syringe. Then the solution of **benzyl chlorides (0.2 mmol, 1 equiv)** in dry MeCN (1 mL) was added. The mixture was then magnetically stirred while being heated in oil bath at 100 °C for 12 hours. Then the heating bath was removed and the flask was cooled down to room temperature. The solvent was removed *in vacuo* and resulting oil was washed with hexane (3 mL×3), from <sup>11</sup>B NMR the conversion could be determined. To a 5 mL electrochemical reaction cell equipped with a magnetic stir bar, pinacol (236.3 mg, 2 mmol, 10 equiv), MgSO<sub>4</sub> (288.9 mg, 2.4 mmol, 12 equiv), and TBAPF<sub>6</sub> (116.3 mg, 0.3 mmol, 0.1 M) were added sequentially. The cell was evacuated and backfilled with N<sub>2</sub> three times. Dry MeCN (1.5 mL) was added. Then the solution of the crude product of the substituted cluster in dry TCE (1.5 mL) was added. The undivided cell was equipped with

RVC (3.5 mm×0.5 mm×0.4 mm) as the anode and RVC (3.5 mm×0.5 mm×0.4 mm) as the cathode and then backfilled with N<sub>2</sub> to replace air atmosphere. The mixture was pre-stirred for five minutes, and then the reaction mixture was electrolyzed at a constant current of 6 mA until passing 2.20 F/mol of total charge (2 hours) at room temperature. The solvent was removed under reduced pressure and the residual solids were extracted with ethyl acetate (10 mL). The extract was concentrated and subjected to column separation to give the alkyl boronic ester products.

**Method C (Electrolysis set up 1, ElectraSyn 2.0):** To a 10 mL oven dried Schlenk tube equipped with a magnetic stir bar, *n*-Bu<sub>4</sub>N(B<sub>6</sub>H<sub>7</sub>) (**1**) (62.4 mg, 0.2 mmol, 1 equiv), and *t*-BuONa (19.2 mg, 0.2 mmol, 1 equiv) were added sequentially. The tube was evacuated and backfilled with N<sub>2</sub> three times. Dry MeCN (1 mL) was added via syringe. Then the solution of **alkyl pseudohalides (0.2 mmol, 1 equiv)** in dry MeCN (1 mL) was added. The mixture was then magnetically stirred while being heated in oil bath at 100 °C for 12 hours. Then the heating bath was removed and the flask was cooled down to room temperature. The solvent was removed *in vacuo* and resulting oil was washed with hexane (3 mL×3), from <sup>11</sup>B NMR the conversion could be determined. To a 5 mL electrochemical reaction cell equipped with a magnetic stir bar, pinacol (236.3 mg, 2 mmol, 10 equiv), MgSO<sub>4</sub> (288.9 mg, 2.4 mmol, 12 equiv), and TBAPF<sub>6</sub> (116.3 mg, 0.3 mmol, 0.1 M) were added sequentially. The cell was evacuated and backfilled with N<sub>2</sub> three times. Dry MeCN (1.5 mL) was added. Then the solution of the crude product of the substituted cluster in dry TCE (1.5 mL) was added. The undivided cell was equipped with RVC (3.5 mm×0.5 mm×0.4 mm) as the anode and RVC (3.5 mm×0.5 mm×0.4 mm) as the cathode and then backfilled with N<sub>2</sub> to replace air atmosphere. The mixture was pre-stirred for five minutes, and then the reaction mixture was electrolyzed at a constant current of 6 mA until passing 2.20 F/mol of total charge (2 hours) at room temperature. The solvent was removed under reduced pressure and the residual solids were extracted with ethyl acetate (10 mL). The extract was concentrated and subjected to column separation to give the alkyl boronic ester products.

**Method D (Electrolysis set up 1, ElectraSyn 2.0):** To a 10 mL oven dried Schlenk tube equipped with a magnetic stir bar, *n*-Bu<sub>4</sub>N(B<sub>6</sub>H<sub>7</sub>) (**1**) (62.4 mg, 0.2 mmol, 1 equiv), and *t*-BuONa (19.2 mg, 0.2 mmol, 1 equiv) were added sequentially. The tube was evacuated and backfilled with N<sub>2</sub> three times. Dry MeCN (1 mL) was added via syringe. Then the solution of **alkyl bromides (0.2 mmol, 1 equiv)** in dry MeCN (1 mL) was added. The mixture was then magnetically stirred while being heated in oil bath at 100 °C for 12 hours. Then the heating bath was removed and the flask was cooled down to room temperature. The solvent was removed *in vacuo* and resulting oil was washed with hexane (3 mL×3), from <sup>11</sup>B NMR the conversion could be determined. To a 5 mL electrochemical reaction cell equipped with a magnetic stir bar, pinacol (236.3 mg, 2 mmol, 10 equiv), MgSO<sub>4</sub> (288.9 mg, 2.4 mmol, 12 equiv), and TBAPF<sub>6</sub> (116.3 mg, 0.3 mmol, 0.1 M) were added sequentially. The cell was evacuated and backfilled with N<sub>2</sub> three times. Dry MeCN (1.5 mL) was added. Then the solution of the crude product of the substituted cluster in dry TCE (1.5 mL) was added. The undivided cell was equipped with RVC (3.5 mm×0.5 mm×0.4 mm) as the anode and RVC (3.5 mm×0.5 mm×0.4 mm) as the cathode and then backfilled with N<sub>2</sub> to replace air atmosphere. The mixture was pre-stirred for

five minutes, and then the reaction mixture was electrolyzed at a constant current of 6 mA until passing **1.10 F/mol of charge (1 hours)** at room temperature. The solvent was removed under reduced pressure and the residual solids were extracted with ethyl acetate (10 mL). The extract was concentrated and subjected to column separation to give the alkyl boronic ester products.

**Method E (Electrolysis set up 1, ElectraSyn 2.0):** To a 10 mL oven dried Schlenk tube equipped with a magnetic stir bar, *n*-Bu<sub>4</sub>N(B<sub>6</sub>H<sub>7</sub>) (**1**) (62.4 mg, 0.2 mmol, 1 equiv), and *t*-BuONa (19.2 mg, 0.2 mmol, 1 equiv) were added sequentially. The tube was evacuated and backfilled with N<sub>2</sub> three times. Dry MeCN (1 mL) was added via syringe. Then the solution of **benzyl bromides or alkyl bromides or alkyl pseudohalides (0.2 mmol, 1 equiv)** in dry MeCN (1 mL) was added. The mixture was then magnetically stirred while being heated in oil bath at 100 °C for 12 hours. Then the heating bath was removed and the flask was cooled down to room temperature. The solvent was removed *in vacuo* and resulting oil was washed with hexane (3 mL×3), from <sup>11</sup>B NMR the conversion could be determined. To a 5 mL electrochemical reaction cell equipped with a magnetic stir bar, **3,4-Diethyl-3,4-hexanediol (278.8 mg, 1.6 mmol, 8 equiv)**, MgSO<sub>4</sub> (288.9 mg, 2.4 mmol, 12 equiv), and TBAPF<sub>6</sub> (116.3 mg, 0.3 mmol, 0.1 M) were added sequentially. The cell was evacuated and backfilled with N<sub>2</sub> three times. Dry MeCN (1.5 mL) was added. Then the solution of the crude product of the substituted cluster in dry TCE (1.5 mL) was added. The undivided cell was equipped with RVC (3.5 mm×0.5 mm×0.4 mm) as the anode and RVC (3.5 mm×0.5 mm×0.4 mm) as the cathode and then backfilled with N<sub>2</sub> to replace air atmosphere. The mixture was pre-stirred for five minutes, and then the reaction mixture was electrolyzed at a constant current of 6 mA until passing 2.20 F/mol of total charge (2 hours) at room temperature. The solvent was removed under reduced pressure and the residual solids were extracted with ethyl acetate (10 mL). The extract was concentrated and subjected to column separation to give the alkyl boronic ester products.

**Method F (Electrolysis set up 2):** To a 10 mL oven dried Schlenk tube equipped with a magnetic stir bar, *n*-Bu<sub>4</sub>N(B<sub>6</sub>H<sub>7</sub>) (**1**) (62.4 mg, 0.2 mmol, 1 equiv), and *t*-BuONa (19.2 mg, 0.2 mmol, 1 equiv) were added sequentially. The tube was evacuated and backfilled with N<sub>2</sub> three times. Dry MeCN (1 mL) was added via syringe. Then the solution of **benzyl bromides or alkyl bromides or alkyl pseudohalides (0.2 mmol, 1 equiv)** in dry MeCN (1 mL) was added. The mixture was then magnetically stirred while being heated in oil bath at 100 °C for 12 hours. Then the heating bath was removed and the flask was cooled down to room temperature. The solvent was removed *in vacuo* and resulting oil was washed with hexane (3 mL×3), from <sup>11</sup>B NMR the conversion could be determined. To a **20 mL** electrochemical reaction cell equipped with a magnetic stir bar, **3,4-Diethyl-3,4-hexanediol (278.8 mg, 1.6 mmol, 8 equiv)**, MgSO<sub>4</sub> (288.9 mg, 2.4 mmol, 12 equiv), and TBAPF<sub>6</sub> (**155.0 mg, 0.4 mmol, 0.1 M**) were added sequentially. The cell was evacuated and backfilled with N<sub>2</sub> three times. Dry MeCN (**2 mL**) was added. Then the solution of the crude product of the substituted cluster in dry TCE (**2 mL**) was added. The undivided cell was equipped with RVC (3.5 mm×0.5 mm×0.4 mm) as the anode and RVC (3.5 mm×0.5 mm×0.4 mm) as the cathode and then backfilled with N<sub>2</sub> to replace air atmosphere. The mixture was pre-stirred for five minutes, and then the reaction mixture was electrolyzed at a constant current of 6 mA until passing 2.20 F/mol of total charge (2 hours) at room temperature. The solvent was removed under reduced pressure and the residual solids



were extracted with ethyl acetate (10 mL). The extract was concentrated and subjected to column separation to give the alkyl boronic ester products.

**Method G (Electrolysis set up 1, ElectraSyn 2.0):** To a 10 mL oven dried Schlenk tube equipped with a magnetic stir bar, *n*-Bu<sub>4</sub>N(B<sub>6</sub>H<sub>7</sub>) (**1**) (**124.9 mg, 0.4 mmol, 2 equiv**), and *t*-BuONa (**38.4 mg, 0.4 mmol, 2 equiv**) were added sequentially. The tube was evacuated and backfilled with N<sub>2</sub> three times. Dry MeCN (1 mL) was added via syringe. Then the solution of **alkyl bromides or alkyl pseudohalides (0.2 mmol, 1 equiv)** in dry MeCN (1 mL) was added. The mixture was then magnetically stirred while being heated in oil bath at 100 °C for 12 hours. Then the heating bath was removed and the flask was cooled down to room temperature. The solvent was removed *in vacuo* and resulting oil was washed with hexane (3 mL×3), from <sup>11</sup>B NMR the conversion could be determined. To a 5 mL electrochemical reaction cell equipped with a magnetic stir bar, **3,4-Diethyl-3,4-hexanediol (278.8 mg, 1.6 mmol, 8 equiv)**, MgSO<sub>4</sub> (288.9 mg, 2.4 mmol, 12 equiv), and TBAPF<sub>6</sub> (116.3 mg, 0.3 mmol, 0.1 M) were added sequentially. The cell was evacuated and backfilled with N<sub>2</sub> three times. Dry MeCN (1.5 mL) was added. Then the solution of the crude product of the substituted cluster in dry TCE (1.5 mL) was added. The undivided cell was equipped with RVC (3.5 mm×0.5 mm×0.4 mm) as the anode and RVC (3.5 mm×0.5 mm×0.4 mm) as the cathode and then backfilled with N<sub>2</sub> to replace air atmosphere. The mixture was pre-stirred for five minutes, and then the reaction mixture was electrolyzed at a constant current of 6 mA until passing 2.20 F/mol of total charge (2 hours) at room temperature. The solvent was removed under reduced pressure and the residual solids were extracted with ethyl acetate (10 mL). The extract was concentrated and subjected to column separation to give the alkyl boronic ester products.

**Method H (Electrolysis set up 1, ElectraSyn 2.0):** To a 10 mL oven dried Schlenk tube equipped with a magnetic stir bar, *n*-Bu<sub>4</sub>N(B<sub>6</sub>H<sub>7</sub>) (**1**) (**93.7 mg, 0.3 mmol, 1.5 equiv**), and *t*-BuONa (**28.8 mg, 0.3 mmol, 1.5 equiv**) were added sequentially. The tube was evacuated and backfilled with N<sub>2</sub> three times. Dry MeCN (1 mL) was added via syringe. Then the solution of **alkyl bromides or alkyl pseudohalides (0.2 mmol, 1 equiv)** in dry MeCN (1 mL) was added. The mixture was then magnetically stirred while being heated in oil bath at 100 °C for 12 hours. Then the heating bath was removed and the flask was cooled down to room temperature. The solvent was removed *in vacuo* and resulting oil was washed with hexane (3 mL×3), from <sup>11</sup>B NMR the conversion could be determined. To a 5 mL electrochemical reaction cell equipped with a magnetic stir bar, **3,4-Diethyl-3,4-hexanediol (278.8 mg, 1.6 mmol, 8 equiv)**, MgSO<sub>4</sub> (288.9 mg, 2.4 mmol, 12 equiv), and TBAPF<sub>6</sub> (116.3 mg, 0.3 mmol, 0.1 M) were added sequentially. The cell was evacuated and backfilled with N<sub>2</sub> three times. Dry MeCN (1.5 mL) was added. Then the solution of the crude product of the substituted cluster in dry TCE (1.5 mL) was added. The undivided cell was equipped with RVC (3.5 mm×0.5 mm×0.4 mm) as the anode and RVC (3.5 mm×0.5 mm×0.4 mm) as the cathode and then backfilled with N<sub>2</sub> to replace air atmosphere. The mixture was pre-stirred for five minutes, and then the reaction mixture was electrolyzed at a constant current of 6 mA until passing 2.20 F/mol of total charge (2 hours) at room temperature. The solvent was removed under reduced pressure and the residual solids were extracted with ethyl acetate (10 mL). The extract was concentrated and subjected to column separation to give the alkyl boronic ester products.

**Method I (Electrolysis set up 1, ElectraSyn 2.0):** To a 10 mL oven dried Schlenk tube equipped with a magnetic stir bar, *n*-Bu<sub>4</sub>N(B<sub>6</sub>H<sub>7</sub>) (**1**) (93.7 mg, 0.3 mmol, 1.5 equiv), and *t*-BuONa (28.8 mg, 0.3 mmol, 1.5 equiv) were added sequentially. The tube was evacuated and backfilled with N<sub>2</sub> three times. Dry MeCN (1 mL) was added via syringe. Then the solution of **alkyl bromides (0.2 mmol, 1 equiv)** in dry MeCN (1 mL) was added. The mixture was then magnetically stirred while being heated in oil bath at 100 °C for **36 hours**. Then the heating bath was removed and the flask was cooled down to room temperature. The solvent was removed *in vacuo* and resulting oil was washed with hexane (3 mL×3), from <sup>11</sup>B NMR the conversion could be determined. To a 5 mL electrochemical reaction cell equipped with a magnetic stir bar, **3,4-Diethyl-3,4-hexanediol (278.8 mg, 1.6 mmol, 8 equiv)**, MgSO<sub>4</sub> (288.9 mg, 2.4 mmol, 12 equiv), and TBAPF<sub>6</sub> (116.3 mg, 0.3 mmol, 0.1 M) were added sequentially. The cell was evacuated and backfilled with N<sub>2</sub> three times. Dry MeCN (1.5 mL) was added. Then the solution of the crude product of the substituted cluster in dry TCE (1.5 mL) was added. The undivided cell was equipped with RVC (3.5 mm×0.5 mm×0.4 mm) as the anode and RVC (3.5 mm×0.5 mm×0.4 mm) as the cathode and then backfilled with N<sub>2</sub> to replace air atmosphere. The mixture was pre-stirred for five minutes, and then the reaction mixture was electrolyzed at a constant current of 6 mA until passing 2.20 F/mol of total charge (2 hours) at room temperature. The solvent was removed under reduced pressure and the residual solids were extracted with ethyl acetate (10 mL). The extract was concentrated and subjected to column separation to give the alkyl boronic ester products.

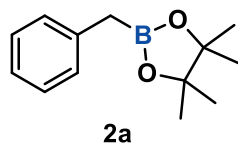

2-Benzyl-4,4,5,5-tetramethyl-1,3,2-dioxaborolane

**Method A** are applied. Benzyl bromide (35.1 mg, 0.2 mmol), *t*-BuONa (19.2 mg, 0.2 mmol) and *n*-Bu<sub>4</sub>N(B<sub>6</sub>H<sub>7</sub>) (**1**) (62.7 mg, 0.2 mmol) are used for substitution step. **For method A**, the <sup>11</sup>B NMR after substitution step:

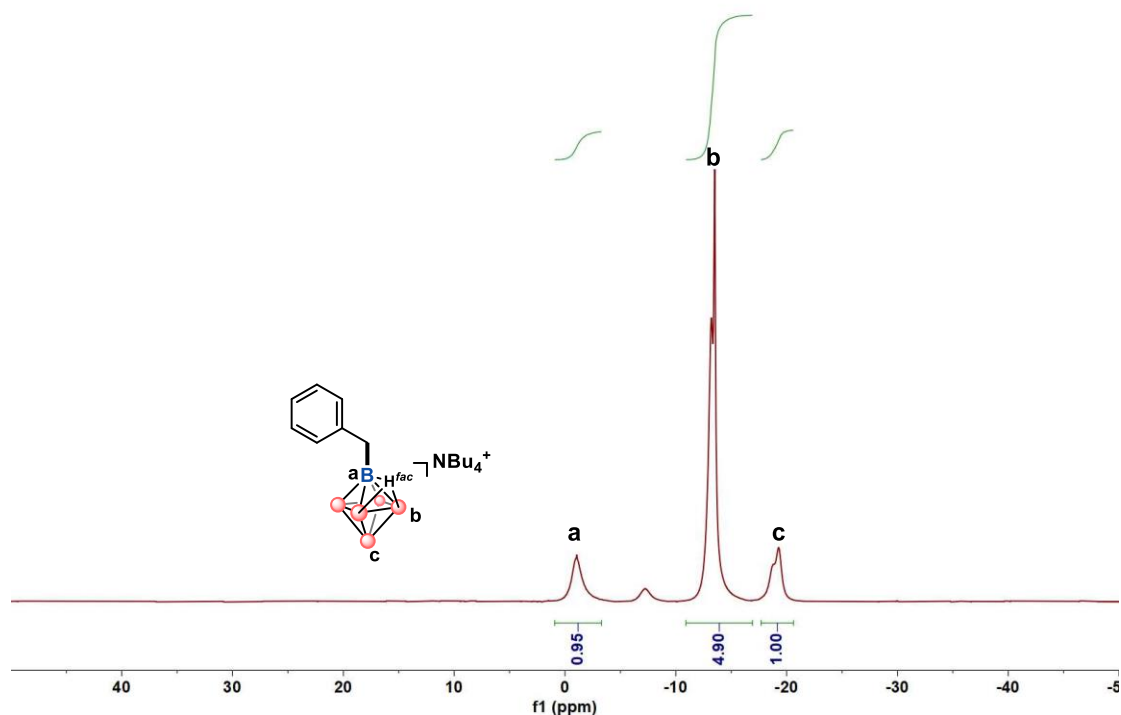

**Figure S21.** <sup>11</sup>B{<sup>1</sup>H} NMR spectrum after substitution step with benzyl bromide.

The assignment of boron signals is shown here. The signal c corresponds to boron atom *B<sub>c</sub>* of substituted cluster, unreacted *closo*-hexaborate anion signal overlapped with signal b corresponds to equatorial boron *B<sub>b</sub>*. The ratio of substituted cluster/hexaborate =  $1/\{(4.90 - 1 \times 4)/6\} = 1/0.15$ , the conversion =  $1/(1+0.15) \times 100\% = 87\%$ .

The title compound after the bulk electrolysis was purified by flash column chromatography (silica gel, Petroleum: EtOAc = 25:1) to give a colorless oil. *R<sub>f</sub>* = 0.43 (Petroleum: EtOAc = 25:1). For method A, 28.0 mg (64%) of product was obtained.

<sup>1</sup>H NMR (400 MHz, CDCl<sub>3</sub>) δ 7.30 – 7.21 (m, 4H), 7.19 – 7.14 (m, 1H), 2.34 (s, 2H), 1.27 (s, 12H).

<sup>13</sup>C{<sup>1</sup>H} NMR (151 MHz, CDCl<sub>3</sub>) δ 138.63, 128.97, 128.24, 124.80, 83.40, 24.73.

The NMR spectra are consistent with literature report.<sup>11</sup> CAS registry No. 87100-28-5

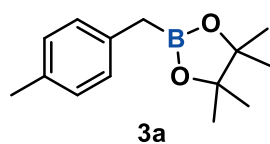

4,4,5,5-Tetramethyl-2-(4-methylbenzyl)-1,3,2-dioxaborolane

**Method A** are applied. 4-Methylbenzyl bromide (38.1 mg, 0.2 mmol), *t*-BuONa (19.0 mg, 0.2 mmol) and *n*-Bu<sub>4</sub>N(B<sub>6</sub>H<sub>7</sub>) (**1**) (62.8 mg, 0.2 mmol) are used for substitution step. **For method A**, the <sup>11</sup>B NMR after substitution step (72% conversion):

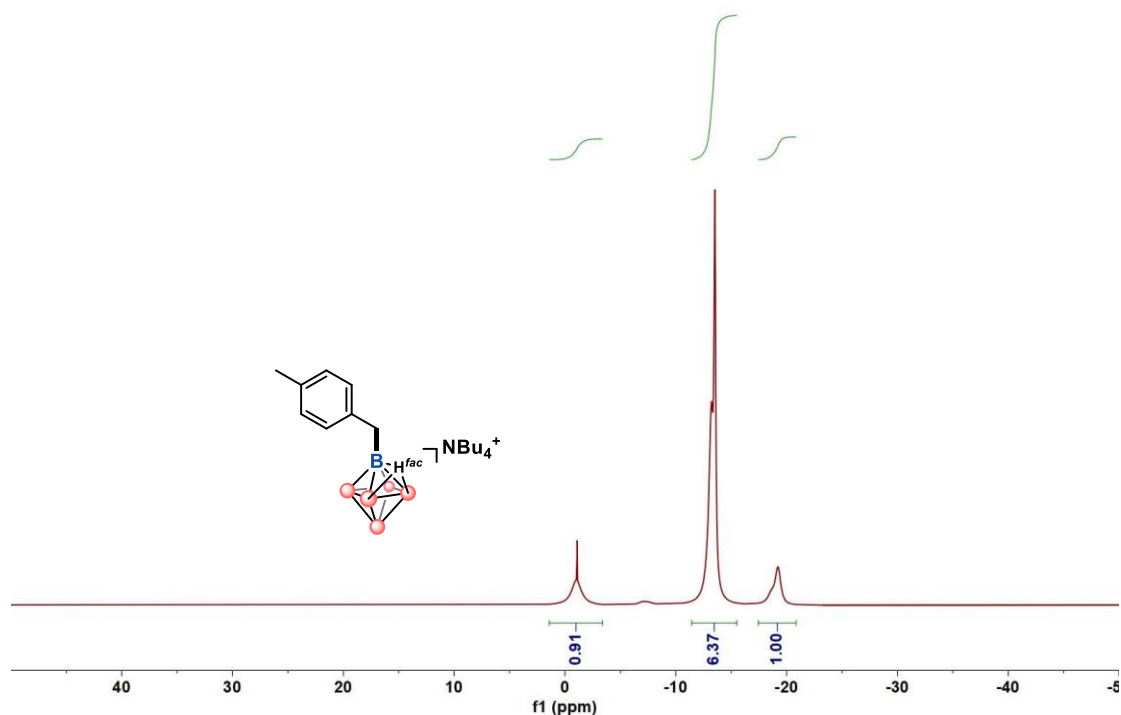

**Figure S22.** <sup>11</sup>B{<sup>1</sup>H} NMR spectrum after substitution step with 4-methylbenzyl bromide. The title compound after the bulk electrolysis was purified by flash column chromatography (silica gel, Petroleum: EtOAc = 20:1) to give a colorless oil. R<sub>f</sub> = 0.7 (Petroleum: EtOAc = 20:1). For method A, 22.5 mg (48%) of product was obtained.

<sup>1</sup>H NMR (600 MHz, CDCl<sub>3</sub>) δ 7.09 -7.05 (m, 4H), 2.30 (s, 3H), 2.26 (s, 2H), 1.24 (s, 12H).

<sup>13</sup>C{<sup>1</sup>H} NMR (151 MHz, CDCl<sub>3</sub>) δ 135.34, 134.08, 128.95, 128.82, 83.32, 24.70, 20.93.

The NMR spectra are consistent with literature report.<sup>11</sup> CAS registry No. 356570-52-0

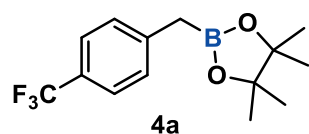

4,4,5,5-Tetramethyl-2-(4-(trifluoromethyl)benzyl)-1,3,2-dioxaborolane

**Method A** are applied. 4-(Trifluoromethyl)benzyl bromide (49.9 mg, 0.2 mmol), *t*-BuONa (19.2 mg, 0.2 mmol) and *n*-Bu<sub>4</sub>N(B<sub>6</sub>H<sub>7</sub>) (**1**) (62.2 mg, 0.2 mmol) are used for substitution step. **For method A**, the <sup>11</sup>B NMR after substitution step (76% conversion):

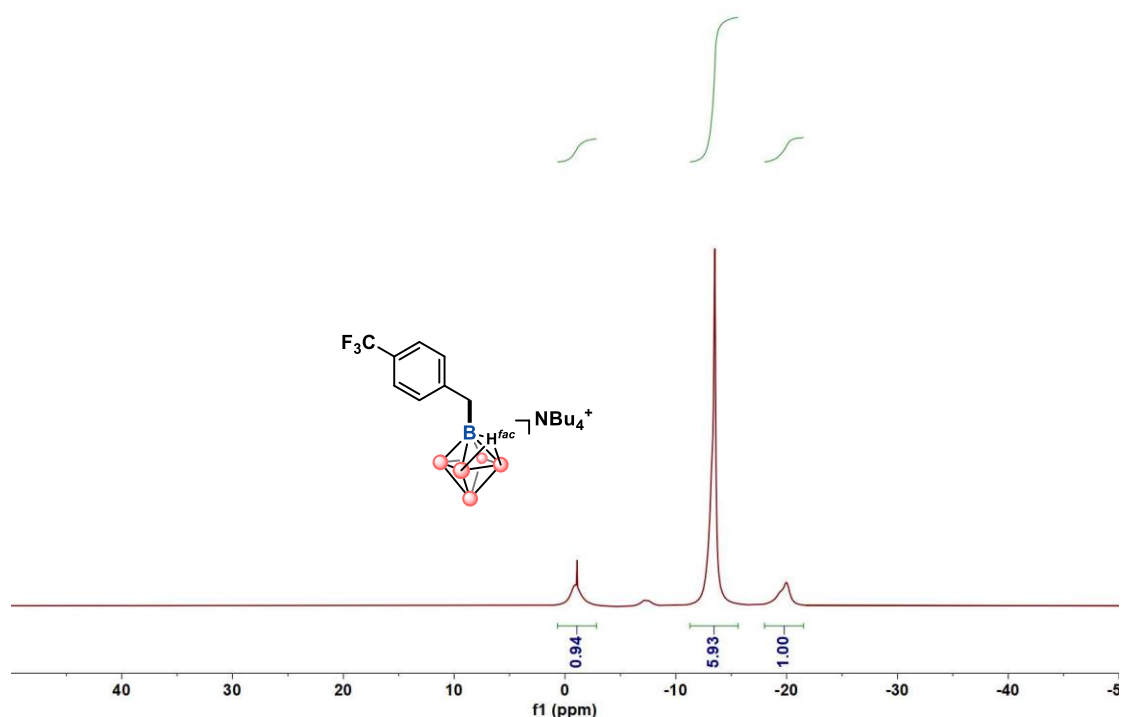

**Figure S23.**  $^{11}\text{B}\{^1\text{H}\}$  NMR spectrum after substitution step with 4-(trifluoromethyl)benzyl bromide.

The title compound after the bulk electrolysis was purified by flash column chromatography (silica gel, Petroleum: EtOAc = 20:1) to give a colorless oil.  $R_f = 0.63$  (Petroleum: EtOAc = 20:1). For method A, 23.4 mg (41%) of product was obtained.

$^1\text{H}$  NMR (600 MHz,  $\text{CDCl}_3$ )  $\delta$  7.48 (d,  $J = 8.0$  Hz, 2H), 7.28 (d,  $J = 7.9$  Hz, 2H), 2.35 (s, 2H), 1.23 (s, 12H).

$^{13}\text{C}\{^1\text{H}\}$  NMR (151 MHz,  $\text{CDCl}_3$ )  $\delta$  143.10, 129.15, 127.15 (q,  $^2J = 31.9$  Hz), 125.12 (q,  $^3J = 4.1$  Hz), 124.51 (q,  $^1J = 271.9$  Hz,  $\text{CF}_3$ ), 83.66, 24.69.

The NMR spectra are consistent with literature report.<sup>11</sup> CAS registry No. 475250-46-5

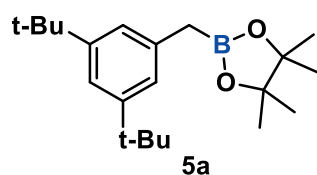

2-(3,5-Bis(1,1-dimethylethyl)phenyl)methyl-4,4,5,5-tetramethyl-1,3,2-dioxaborolane

**Method A** are applied. 3,5-Bis(1,1-dimethylethyl)phenyl]methyl bromide (57.7 mg, 0.2 mmol),  $t\text{-BuONa}$  (19.6 mg, 0.2 mmol) and  $n\text{-Bu}_4\text{N}(\text{B}_6\text{H}_7)$  (**1**) (62.0 mg, 0.2 mmol) are used for substitution step. **For method A**, the  $^{11}\text{B}$  NMR after substitution step (84% conversion):

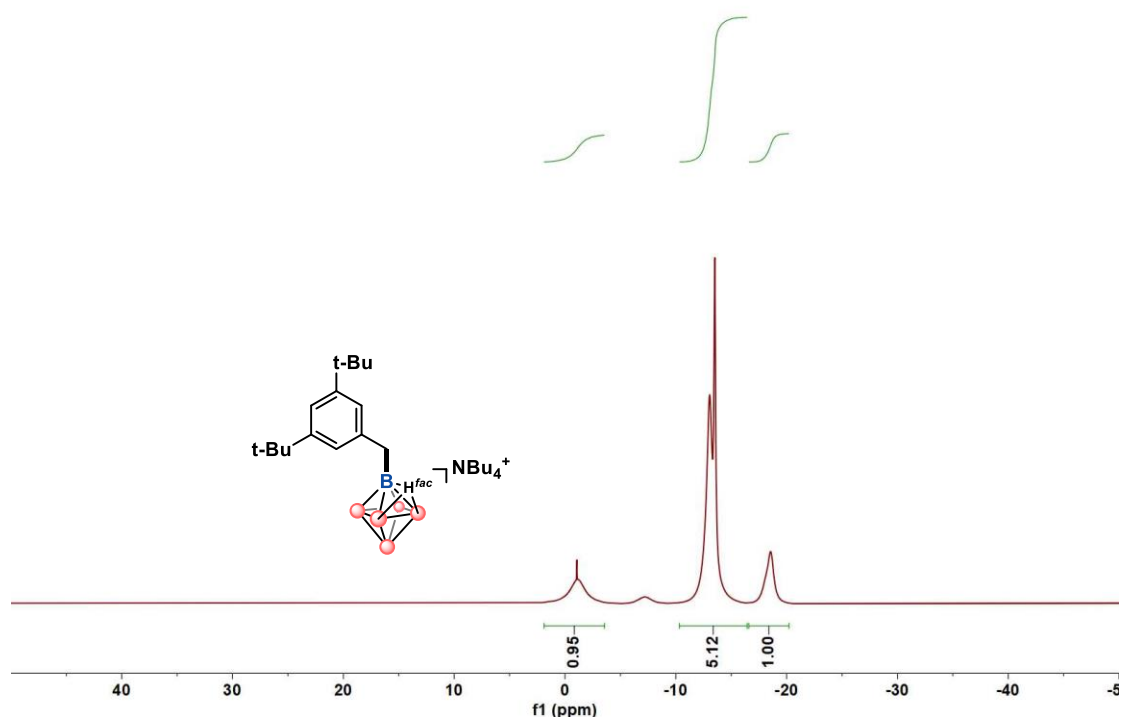

**Figure S24.**  $^{11}\text{B}\{^1\text{H}\}$  NMR spectrum after substitution step with 3,5-bis(1,1-dimethylethyl)phenyl)methyl.

The title compound after the bulk electrolysis was purified by flash column chromatography (silica gel, Petroleum: EtOAc = 30:1) to give a colorless oil.  $R_f$  = 0.76 (Petroleum: EtOAc = 30:1). For method A, 35.7 mg (54%) of product was obtained.

$^1\text{H}$  NMR (400 MHz,  $\text{CDCl}_3$ )  $\delta$  7.19–7.18 (m, 1H), 7.05–7.04 (m, 2H), 2.29 (s, 2H), 1.31 (s, 18H), 1.26 (s, 12H).

$^{13}\text{C}\{^1\text{H}\}$  NMR (101 MHz,  $\text{CDCl}_3$ )  $\delta$  150.29, 137.21, 123.47, 118.81, 83.28, 34.70, 31.49, 24.75.

$^{11}\text{B}\{^1\text{H}\}$  NMR (193 MHz,  $\text{CDCl}_3$ )  $\delta$  33.23.

HR-MS (ESI) for  $\text{C}_{21}\text{H}_{35}^{11}\text{BO}_2\text{Na}$  [M]  $m/z$   $[\text{M}+\text{Na}]^+$ : calculated: 353.2628, found: 353.2628

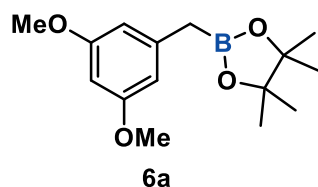

2-(3,5-dimethoxybenzyl)-4,4,5,5-tetramethyl-1,3,2-dioxaborolane

**Method A** are applied. 3,5-Dimethoxybenzyl bromide (46.7 mg, 0.2 mmol), *t*-BuONa (19.7 mg, 0.2 mmol) and *n*-Bu<sub>4</sub>N(B<sub>6</sub>H<sub>7</sub>) (**1**) (62.5 mg, 0.2 mmol) are used for substitution step. **For method A**, the  $^{11}\text{B}$  NMR after substitution step (72% conversion):

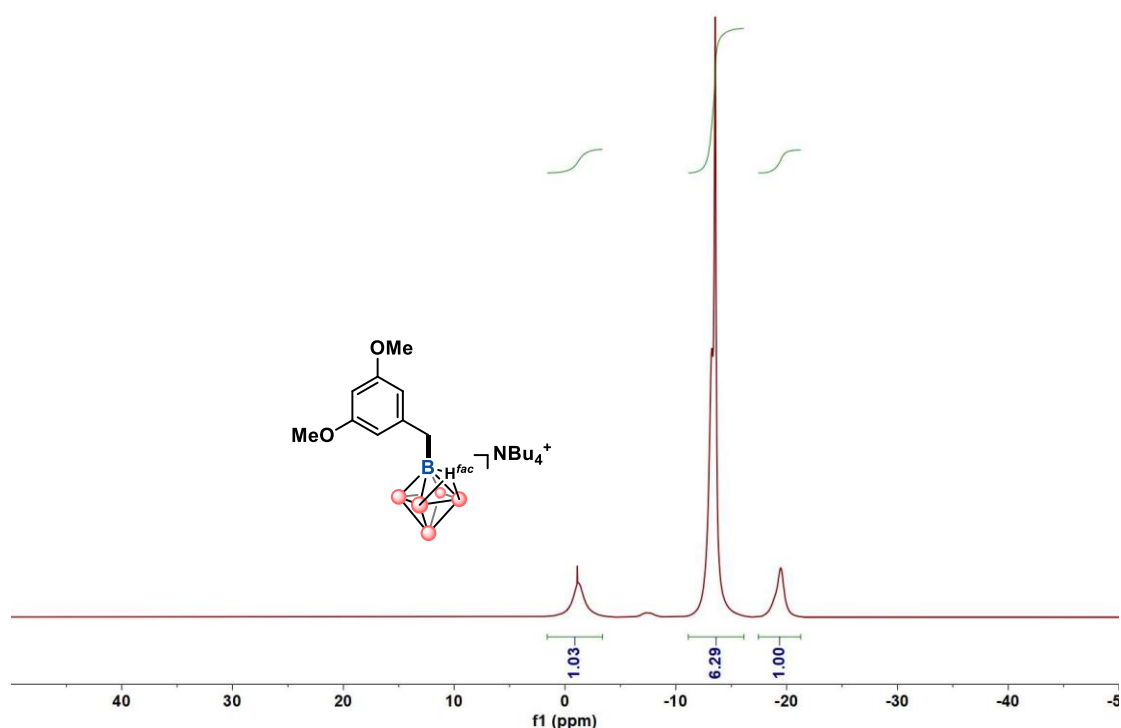

**Figure S25.**  $^{11}\text{B}\{^1\text{H}\}$  NMR spectrum after substitution step with 3,5-dimethoxybenzyl bromide.

The title compound after the bulk electrolysis was purified by flash column chromatography (silica gel, Petroleum: EtOAc = 30:1) to give a colorless oil.  $R_f = 0.32$  (Petroleum: EtOAc = 20:1). For method A, 17.9 mg (32%) of product was obtained.

$^1\text{H}$  NMR (400 MHz,  $\text{CDCl}_3$ )  $\delta$  6.35 (d,  $J = 2.2$  Hz, 2H), 6.25 (t,  $J = 2.3$  Hz, 1H), 3.76 (s, 6H), 2.24 (s, 2H), 1.24 (s, 12H).

$^{13}\text{C}\{^1\text{H}\}$  NMR (101 MHz,  $\text{CDCl}_3$ )  $\delta$  160.58, 140.89, 107.06, 97.27, 83.44, 55.17, 24.70.

The NMR spectra are consistent with literature report.<sup>12</sup> CAS registry No. 1854115-26-6

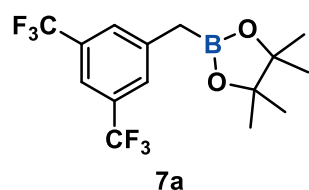

2-(3,5-bis(trifluoromethyl)benzyl)-4,4,5,5-tetramethyl-1,3,2-dioxaborolane

**Method A** are applied. 3,5-Bis(trifluoromethyl)benzyl bromide (62.4 mg, 0.2 mmol), *t*-BuONa (19.8 mg, 0.2 mmol) and *n*-Bu<sub>4</sub>N(B<sub>6</sub>H<sub>7</sub>) (**1**) (62.4 mg, 0.2 mmol) are used for substitution step.

**For method A**, the  $^{11}\text{B}$  NMR after substitution step (68% conversion):

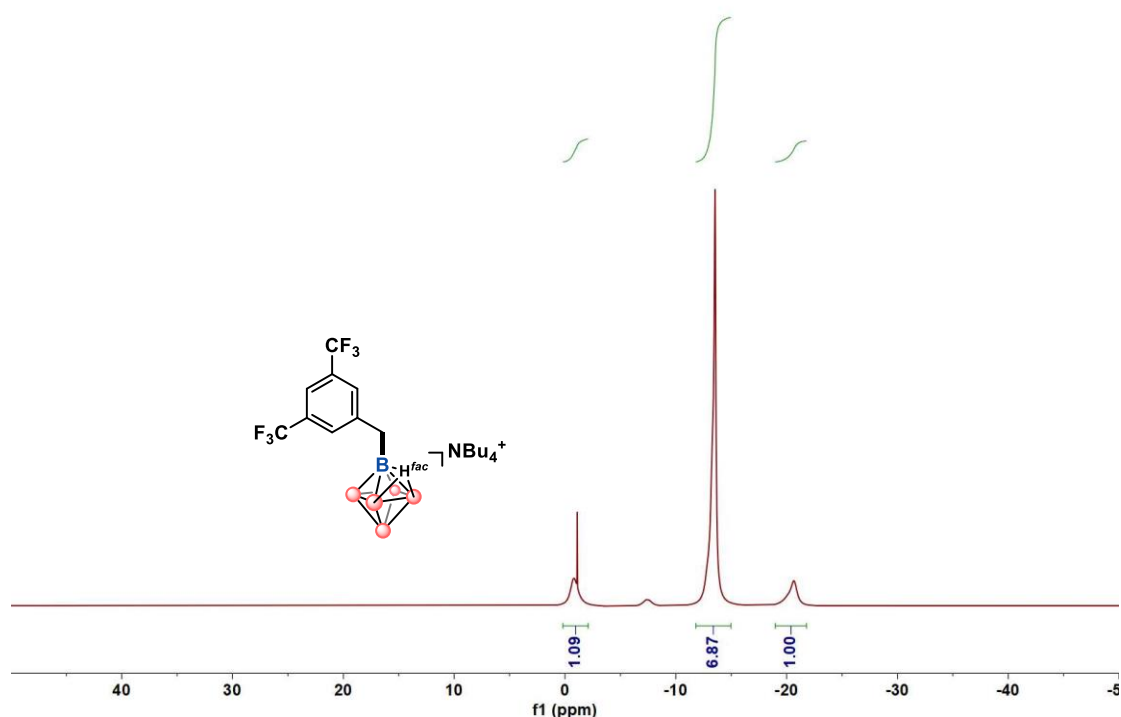

**Figure S26.**  $^{11}\text{B}\{^1\text{H}\}$  NMR spectrum after substitution step with 3,5-bis(trifluoromethyl)benzyl bromide.

The title compound after the bulk electrolysis was purified by flash column chromatography (silica gel, Petroleum: EtOAc = 30:1) to give a colorless oil.  $R_f = 0.06$  (Petroleum). For method A, 38.1 mg (53%) of product was obtained.

$^1\text{H}$  NMR (400 MHz,  $\text{CDCl}_3$ )  $\delta$  7.63 (s, 3H), 2.42 (s, 2H), 1.24 (s, 12H).

$^{13}\text{C}\{^1\text{H}\}$  NMR (101 MHz,  $\text{CDCl}_3$ )  $\delta$  141.31, 131.22 (q,  $^2J = 32.8$  Hz), 129.1, 124.82 (q,  $^1J = 271.7$  Hz,  $\text{CF}_3$ ), 119.0 (q,  $^3J = 3.8$  Hz), 83.97, 24.65.

The NMR spectra are consistent with literature report.<sup>12</sup> CAS registry No. 1854115-27-7

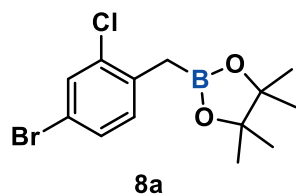

2-[(2-Chloro-4-bromide)methyl]-4,4,5,5-tetramethyl-1,3,2-dioxaborolane

**Method A** are applied. 4-Bromo-1-(bromomethyl)-2-chloro-bromide (56.1 mg, 0.2 mmol), *t*-BuONa (19.1 mg, 0.2 mmol) and *n*-Bu<sub>4</sub>N(B<sub>6</sub>H<sub>7</sub>) (**1**) (62.2 mg, 0.2 mmol) are used for substitution step. **For method A**, the  $^{11}\text{B}$  NMR after substitution step (77% conversion):



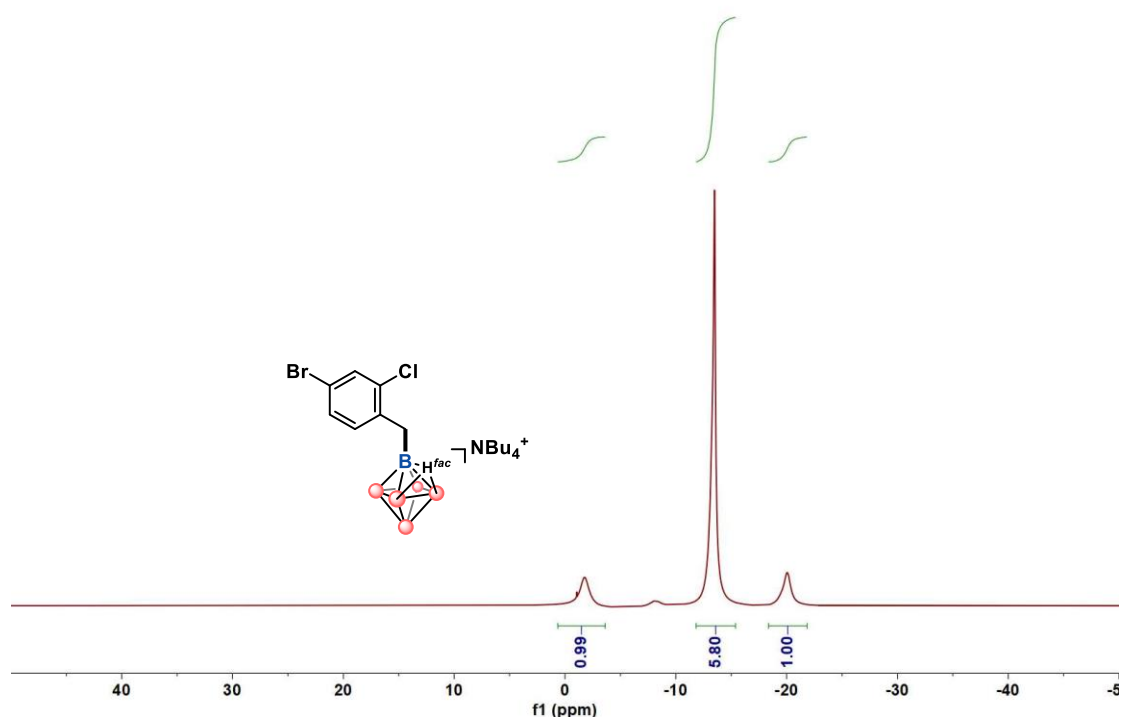

**Figure S27.**  $^{11}\text{B}\{^1\text{H}\}$  NMR spectrum after substitution step with 4-bromo-1-(bromomethyl)-2-chloro-bromide.

The title compound after the bulk electrolysis was purified by flash column chromatography (silica gel, Petroleum: EtOAc = 25:1) to give a colorless oil.  $R_f$  = 0.31 (Petroleum: EtOAc = 25:1). For method A, 33.2 mg (50%) of product was obtained.

$^1\text{H}$  NMR (400 MHz,  $\text{CDCl}_3$ )  $\delta$  7.48 – 7.46 (m, 1H), 7.28 – 7.25 (m, 1H), 7.10 – 7.08 (m, 1H), 2.33 (s, 2H), 1.24 (s, 12H).

$^{13}\text{C}\{^1\text{H}\}$  NMR (101 MHz,  $\text{CDCl}_3$ )  $\delta$  136.72, 134.71, 131.85, 131.51, 129.79, 118.73, 83.68, 24.69.

$^{11}\text{B}\{^1\text{H}\}$  NMR (193 MHz,  $\text{CDCl}_3$ )  $\delta$  32.74.

HR-MS (EI) for  $\text{C}_{13}\text{H}_{17}^{11}\text{BO}_2^{35}\text{Cl}^{81}\text{Br}$  [M]  $m/z$  [M] $^+$ : calculated: 332.0173, found: 332.0171

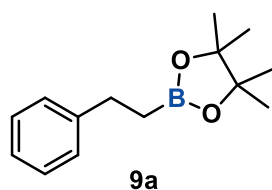

4,4,5,5-Tetramethyl-2-phenethyl-1,3,2-dioxaborolane

**Method A** are applied. (2-Bromoethyl)benzene (37.5 mg, 0.2 mmol), *t*-BuONa (19.9 mg, 0.2 mmol) and *n*-Bu<sub>4</sub>N(B<sub>6</sub>H<sub>7</sub>) (**1**) (63.0 mg, 0.2 mmol) are used for substitution step. **For method A**, the  $^{11}\text{B}$  NMR after substitution step (54% conversion):

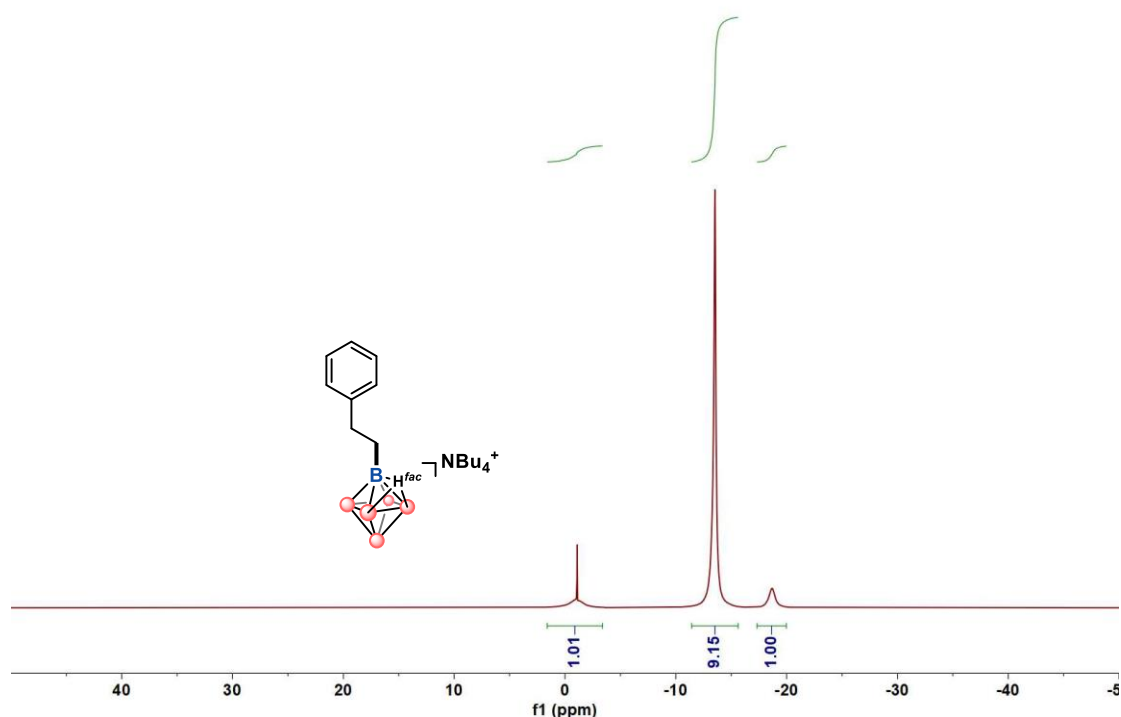

**Figure S28.**  $^{11}\text{B}\{^1\text{H}\}$  NMR spectrum after substitution step with (2-bromoethyl)benzene. The title compound after the bulk electrolysis was purified by flash column chromatography (silica gel, Petroleum: EtOAc = 25:1) to give a colorless oil.  $R_f = 0.6$  (Petroleum: EtOAc = 25:1). For method A, 19.0 mg (41%) of product was obtained.  
 $^1\text{H}$  NMR (600 MHz,  $\text{CDCl}_3$ )  $\delta$  7.28 – 7.26 (m, 2H), 7.24 – 7.22 (m, 2H), 7.17 – 7.13 (m, 1H), 2.75 (t,  $J = 7.95$ , 2H), 1.22 (s, 12H), 1.17 – 1.13 (m, 2H).  
 $^{13}\text{C}\{^1\text{H}\}$  NMR (101 MHz,  $\text{CDCl}_3$ )  $\delta$  144.41, 128.17, 127.99, 125.48, 83.09, 29.93, 24.79.  
 The NMR spectra are consistent with literature report.<sup>11</sup> CAS registry No. 165904-22-3

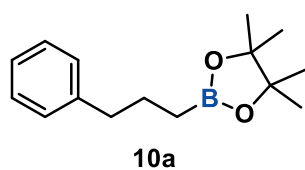

4,4,5,5-Tetramethyl-2-(3-phenylpropyl)-1,3,2-dioxaborolane

**Method A** are applied. 1-Bromo-3-phenylpropane (40.6 mg, 0.2 mmol), *t*-BuONa (19.6 mg, 0.2 mmol) and *n*-Bu<sub>4</sub>N(B<sub>6</sub>H<sub>7</sub>) (**1**) (62.6 mg, 0.2 mmol) are used for substitution step. **For method A**, the  $^{11}\text{B}$  NMR after substitution step (76% conversion):

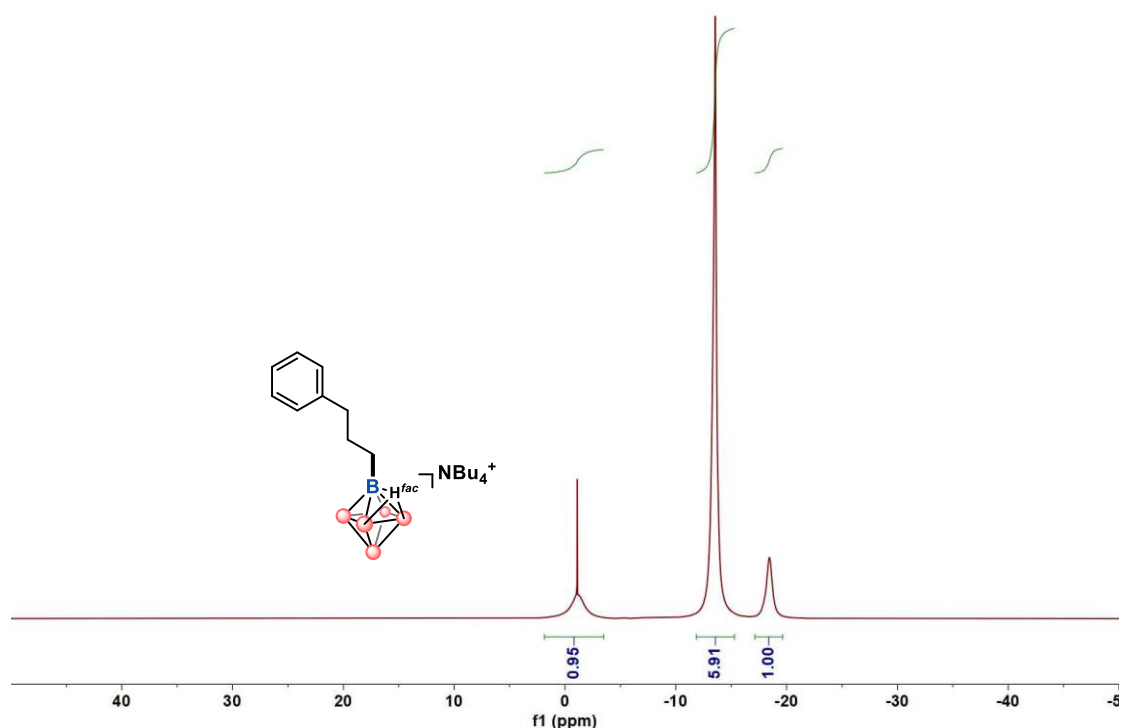

**Figure S29.**  $^{11}\text{B}\{^1\text{H}\}$  NMR spectrum after substitution step with 1-bromo-3-phenylpropane. The title compound after the bulk electrolysis was purified by flash column chromatography (silica gel, Petroleum: EtOAc = 40:1) to give a colorless oil.  $R_f = 0.6$  (Petroleum: EtOAc = 20:1). For method A, 25.8 mg (52%) of product was obtained.

$^1\text{H}$  NMR (400 MHz,  $\text{CDCl}_3$ )  $\delta$  7.29 – 7.26 (m, 2H), 7.20 – 7.15 (m, 3H), 2.62 (t,  $J = 7.78$ , 2H), 1.79 – 1.71 (m, 2H), 1.26 (s, 12H), 0.84 (t,  $J = 7.93$  Hz, 2H).

$^{13}\text{C}\{^1\text{H}\}$  NMR (151 MHz,  $\text{CDCl}_3$ )  $\delta$  142.68, 128.53, 128.15, 125.54, 82.92, 38.58, 26.09, 24.81.

The NMR spectra are consistent with literature report.<sup>13</sup> CAS registry No. 329685-40-7

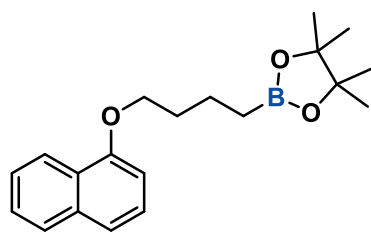

**11a**

2-[4-(1-naphthalenyloxy)butyl]-4,4,5,5-tetramethyl-1,3,2-dioxaborolane

**Method A** are applied. 1-(4-Bromobutoxy)naphthalene (57.4 mg, 0.2 mmol), *t*-BuONa (19.3 mg, 0.2 mmol) and *n*-Bu<sub>4</sub>N(B<sub>6</sub>H<sub>7</sub>) (**1**) (62.5 mg, 0.2 mmol) are used for substitution step. **For method A**, the  $^{11}\text{B}$  NMR after substitution step (95% conversion):

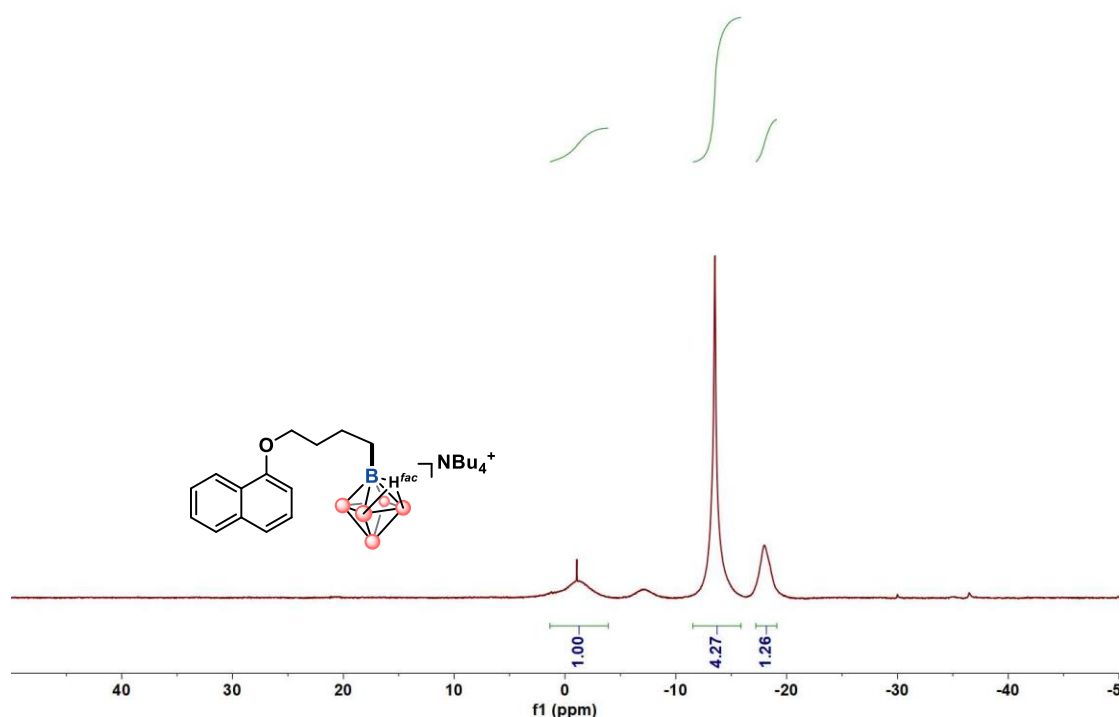

**Figure S30.**  $^{11}\text{B}\{^1\text{H}\}$  NMR spectrum after substitution step with 1-(4-bromobutoxy)naphthalene.

The title compound after the bulk electrolysis was purified by flash column chromatography (silica gel, Petroleum: EtOAc = 40:1) to give a colorless oil.  $R_f$  = 0.59 (Petroleum: EtOAc = 16:1). For method A, 36.9 mg (57%) of product was obtained.

$^1\text{H}$  NMR (400 MHz,  $\text{CDCl}_3$ )  $\delta$  8.32 – 8.28 (m, 1H), 7.80 – 7.76 (m, 1H), 7.50 – 7.43 (m, 2H), 7.41 – 7.34 (m, 2H), 6.80 – 6.78 (m, 1H), 4.14 (t,  $J$  = 6.4 Hz, 2H), 1.99 – 1.91 (m, 2H), 1.75 – 1.67 (m, 2H), 1.26 (s, 12H), 0.92 (t,  $J$  = 7.8 Hz, 2H).

$^{13}\text{C}\{^1\text{H}\}$  NMR (101 MHz,  $\text{CDCl}_3$ )  $\delta$  154.88, 134.45, 127.33, 126.24, 125.88, 124.95, 122.19, 119.82, 104.44, 82.99, 67.87, 31.82, 24.81, 20.80.

$^{11}\text{B}\{^1\text{H}\}$  NMR (193 MHz,  $\text{CDCl}_3$ )  $\delta$  34.08.

HR-MS (EI) for  $\text{C}_{20}\text{H}_{27}^{11}\text{BO}_3$  [M]  $m/z$  [M] $^+$ : calculated: 326.2053, found: 326.2055

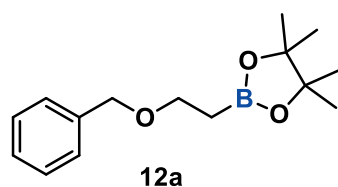

2-(2-(Benzyloxy)ethyl)-4,4,5,5-tetramethyl-1,3,2-dioxaborolane

**Method A** are applied. Benzyl 2-bromoethyl ether (44.4 mg, 0.2 mmol), *t*-BuONa (19.8 mg, 0.2 mmol) and *n*-Bu<sub>4</sub>N(B<sub>6</sub>H<sub>7</sub>) (**1**) (63.3 mg, 0.2 mmol) are used for substitution step. **For method A**, the  $^{11}\text{B}$  NMR after substitution step (67% conversion):

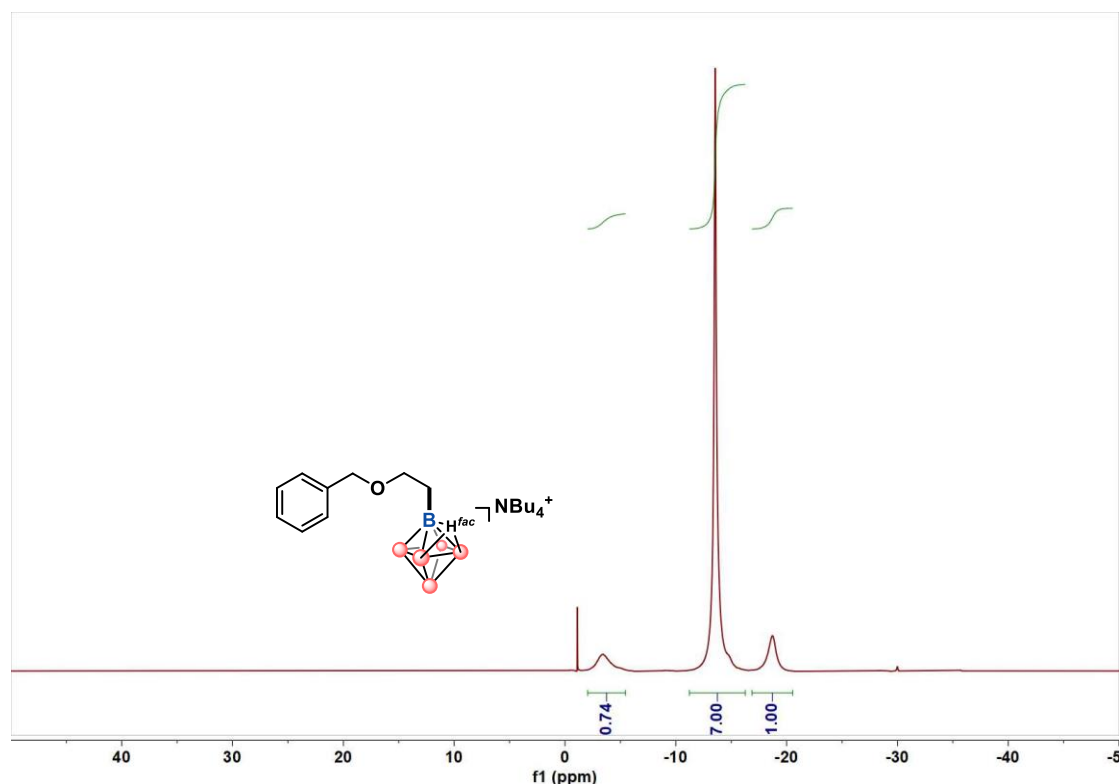

**Figure S31.**  $^{11}\text{B}\{^1\text{H}\}$  NMR spectrum after substitution step with benzyl 2-bromoethyl ether. The title compound after the bulk electrolysis was purified by flash column chromatography (silica gel, Petroleum: EtOAc = 25:1) to give a colorless oil.  $R_f = 0.2$  (Petroleum: EtOAc = 30:1). For method A, 19.1 mg (36%) of product was obtained.

$^1\text{H}$  NMR (600 MHz,  $\text{CDCl}_3$ )  $\delta$  7.35 – 7.31 (m, 4H), 7.27 – 7.26 (m, 1H), 4.51 (s, 2H), 3.63 (t,  $J = 7.9$  Hz, 2H), 1.26 – 1.23 (m, 14H).

$^{13}\text{C}\{^1\text{H}\}$  NMR (151 MHz,  $\text{CDCl}_3$ )  $\delta$  138.78, 128.26, 127.60, 127.34, 83.15, 72.58, 67.04, 24.80.

The NMR spectra are consistent with literature report.<sup>14</sup> CAS registry No. 137297-51-9

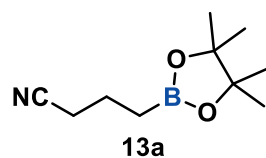

4-(4,4,5,5-Tetramethyl-1,3,2-dioxaborolan-2-yl)butanenitrile

**Method D** are applied. 3-Bromopropyl cyanide (30.5 mg, 0.2 mmol), *t*-BuONa (19.5 mg, 0.2 mmol) and *n*-Bu<sub>4</sub>N(B<sub>6</sub>H<sub>7</sub>) (**1**) (62.7 mg, 0.2 mmol) are used for substitution step. **For method D**, the  $^{11}\text{B}$  NMR after substitution step (61% conversion):

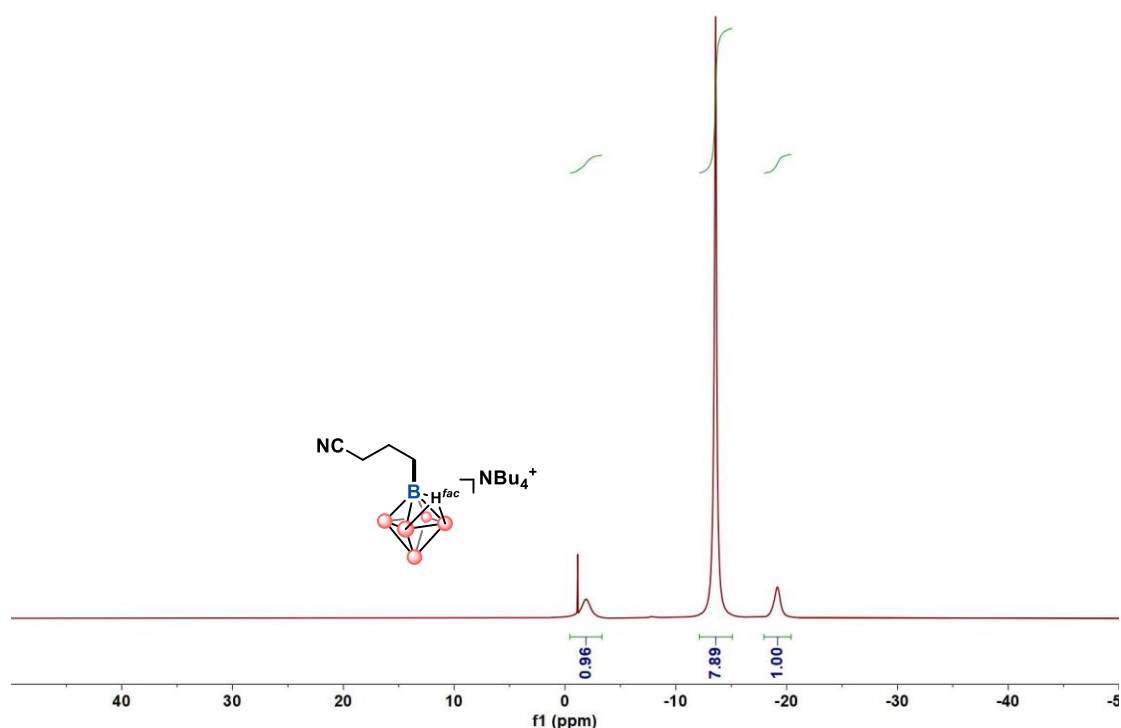

**Figure S32.**  $^{11}\text{B}\{^1\text{H}\}$  NMR spectrum after substitution step with 3-bromopropyl cyanide. The title compound after the bulk electrolysis was purified by flash column chromatography (silica gel, Petroleum: EtOAc = 8:1) to give a colorless oil.  $R_f = 0.56$  (Petroleum: EtOAc = 4:1). For method A, 19.4 mg (50%) of product was obtained.  
 $^1\text{H}$  NMR (400 MHz,  $\text{CDCl}_3$ )  $\delta$  2.37 (t,  $J = 7.2$  Hz, 2H), 1.82 – 1.74 (m, 2H), 1.24 (s, 12H), 0.94 (t,  $J = 7.8$  Hz, 2H).  
 $^{13}\text{C}\{^1\text{H}\}$  NMR (101 MHz,  $\text{CDCl}_3$ )  $\delta$  119.87, 83.35, 24.80, 20.36, 19.15.  
 The NMR spectra are consistent with literature report.<sup>15</sup> CAS registry No. 2238088-16-9

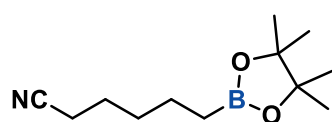

**14a**

6-(4,4,5,5-tetramethyl-1,3,2-dioxaborolan-2-yl)hexanenitrile

**Method A** are applied. 6-Bromohexanenitrile (37.2 mg, 0.2 mmol), *t*-BuONa (18.9 mg, 0.2 mmol) and *n*-Bu<sub>4</sub>N(B<sub>6</sub>H<sub>7</sub>) (**1**) (62.4 mg, 0.2 mmol) are used for substitution step. **For method A**, the  $^{11}\text{B}$  NMR after substitution step (93% conversion):

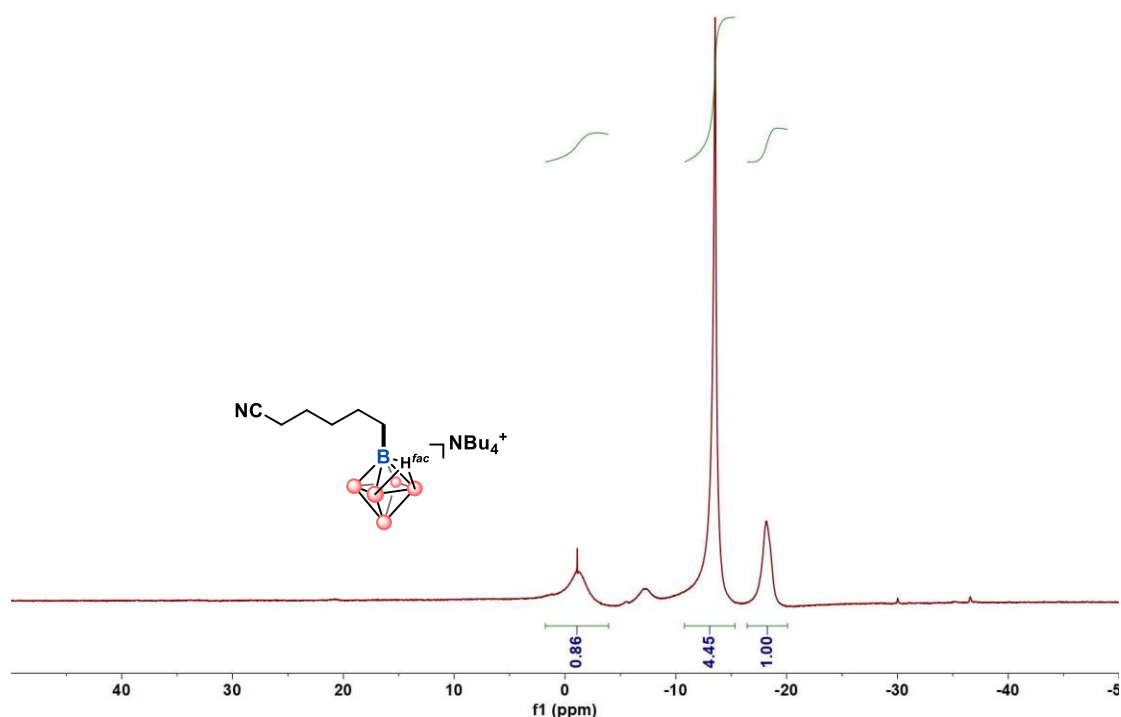

**Figure S33.**  $^{11}\text{B}\{^1\text{H}\}$  NMR spectrum after substitution step with 6-bromohexanenitrile. The title compound after the bulk electrolysis was purified by flash column chromatography (silica gel, Petroleum: EtOAc = 8:1) to give a colorless oil.  $R_f = 0.65$  (Petroleum: EtOAc = 4:1). For method A, 24.2 mg (54%) of product was obtained.  
 $^1\text{H}$  NMR (400 MHz,  $\text{CDCl}_3$ )  $\delta$  2.33 (t,  $J = 7.2$  Hz, 2H), 1.67 – 1.62 (m, 2H), 1.47 – 1.43 (m, 4H), 1.25 (s, 12H), 0.81 – 0.77 (m, 2H).  
 $^{13}\text{C}\{^1\text{H}\}$  NMR (101 MHz,  $\text{CDCl}_3$ )  $\delta$  119.86, 83.02, 31.18, 29.68, 25.13, 24.80, 23.11, 17.02.  
 The NMR spectra are consistent with literature report.<sup>3</sup> CAS registry No. 1361022-65-2

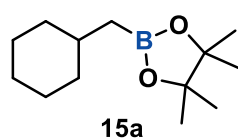

2-(Cyclohexylmethyl)-4,4,5,5-tetramethyl-1,3,2-dioxaborolane

**Method A** are applied. Cyclohexylmethyl bromide (35.1 mg, 0.2 mmol), *t*-BuONa (20.1 mg, 0.2 mmol) and *n*-Bu<sub>4</sub>N(B<sub>6</sub>H<sub>7</sub>) (**1**) (62.3 mg, 0.2 mmol) are used for substitution step. **For method A**, the  $^{11}\text{B}$  NMR after substitution step (74% conversion):

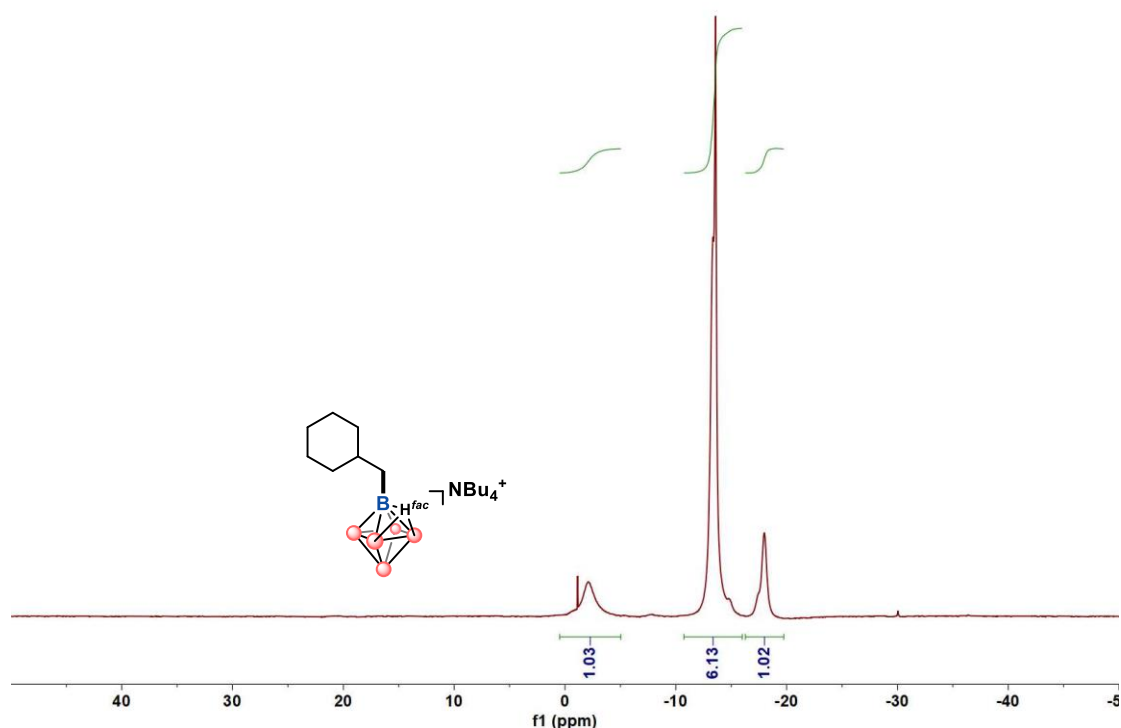

**Figure S34.**  $^{11}\text{B}\{^1\text{H}\}$  NMR spectrum after substitution step with cyclohexylmethyl bromide. The title compound after the bulk electrolysis was purified by flash column chromatography (silica gel, Petroleum: EtOAc = 20:1) to give a colorless oil.  $R_f = 0.88$  (Petroleum: EtOAc = 20:1). For method A, 19.3 mg (43%) of product was obtained.

$^1\text{H}$  NMR (600 MHz,  $\text{CDCl}_3$ )  $\delta$  1.70 – 1.59 (m, 5H), 1.50 – 1.46 (m, 1H), 1.26 – 1.22 (m, 14H), 1.13 – 1.08 (m, 1H), 0.95 – 0.88 (m, 2H), 0.71 (d,  $J = 7.2$  Hz, 2H).

$^{13}\text{C}\{^1\text{H}\}$  NMR (151 MHz,  $\text{CDCl}_3$ )  $\delta$  82.79, 35.91, 34.19, 26.54, 26.28, 24.82.

The NMR spectra are consistent with literature report.<sup>14</sup> CAS registry No. 123706-53-6

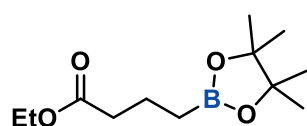

**16a**

Ethyl 4-(4,4,5,5-tetramethyl-1,3,2-dioxaborolan-2-yl)butanoate

**Method A** are applied. Ethyl 4-bromobutyrate (40.5 mg, 0.2 mmol), *t*-BuONa (19.1 mg, 0.2 mmol) and *n*-Bu<sub>4</sub>N(B<sub>6</sub>H<sub>7</sub>) (**1**) (62.5 mg, 0.2 mmol) are used for substitution step. **For method A**, the  $^{11}\text{B}$  NMR after substitution step (47% conversion):



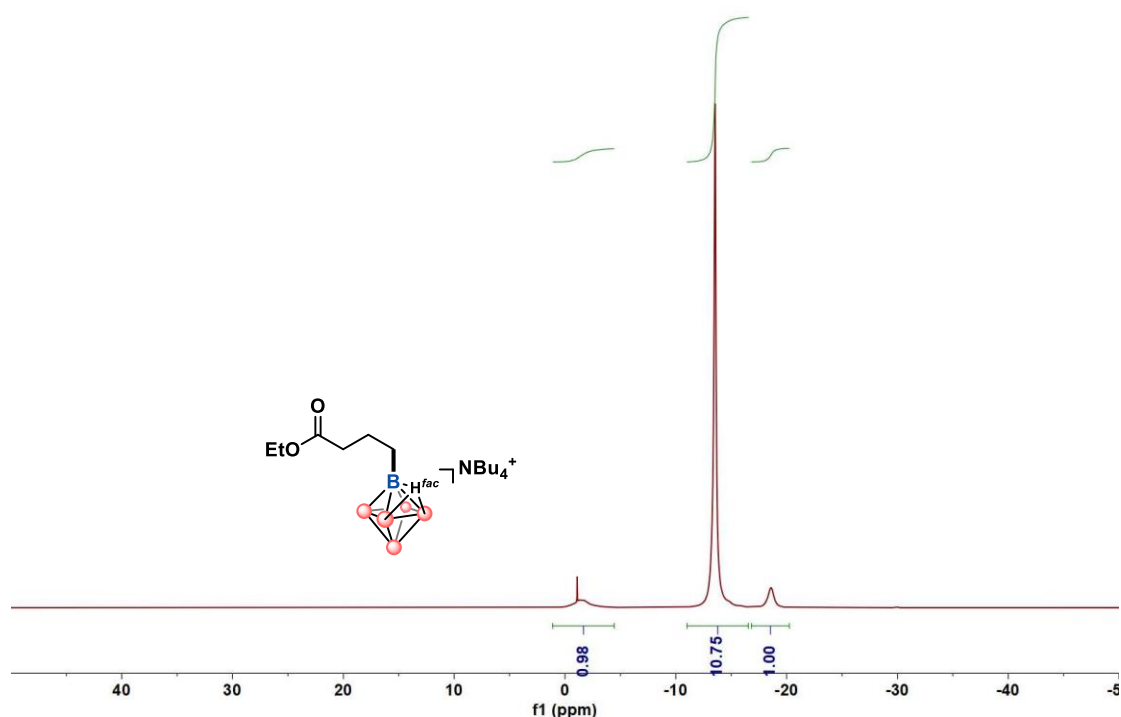

**Figure S35.**  $^{11}\text{B}\{^1\text{H}\}$  NMR spectrum after substitution step with ethyl 4-bromobutyrate.

The title compound after the bulk electrolysis was purified by flash column chromatography (silica gel, Petroleum: EtOAc = 25:1) to give a colorless oil.  $R_f = 0.39$  (Petroleum: EtOAc = 16:1). For method A, 11.3 mg (23%) of product was obtained.

$^1\text{H}$  NMR (400 MHz,  $\text{CDCl}_3$ )  $\delta$  4.11 (q,  $J = 7.1$  Hz, 2H), 2.31 (t,  $J = 7.6$  Hz, 2H), 1.78 – 1.71 (m, 2H), 1.27 – 1.23 (m, 15H), 0.82 (t,  $J = 7.9$  Hz, 2H).

$^{13}\text{C}\{^1\text{H}\}$  NMR (151 MHz,  $\text{CDCl}_3$ )  $\delta$  173.72, 83.04, 60.08, 36.60, 24.80, 19.64, 14.24.

The NMR spectra are consistent with literature report.<sup>15</sup> CAS registry No. 1392140-97-4

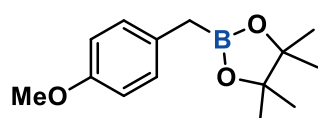

**17a**

2-(4-Methoxybenzyl)-4,4,5,5-tetramethyl-1,3,2-dioxaborolane

**Method B** are applied. 4-Methoxybenzylchloride (31.8 mg, 0.2 mmol), *t*-BuONa (19.4 mg, 0.2 mmol) and *n*-Bu<sub>4</sub>N(B<sub>6</sub>H<sub>7</sub>) (**1**) (62.5 mg, 0.2 mmol) are used for substitution step. **For method B**, the  $^{11}\text{B}$  NMR after substitution step (88% conversion):

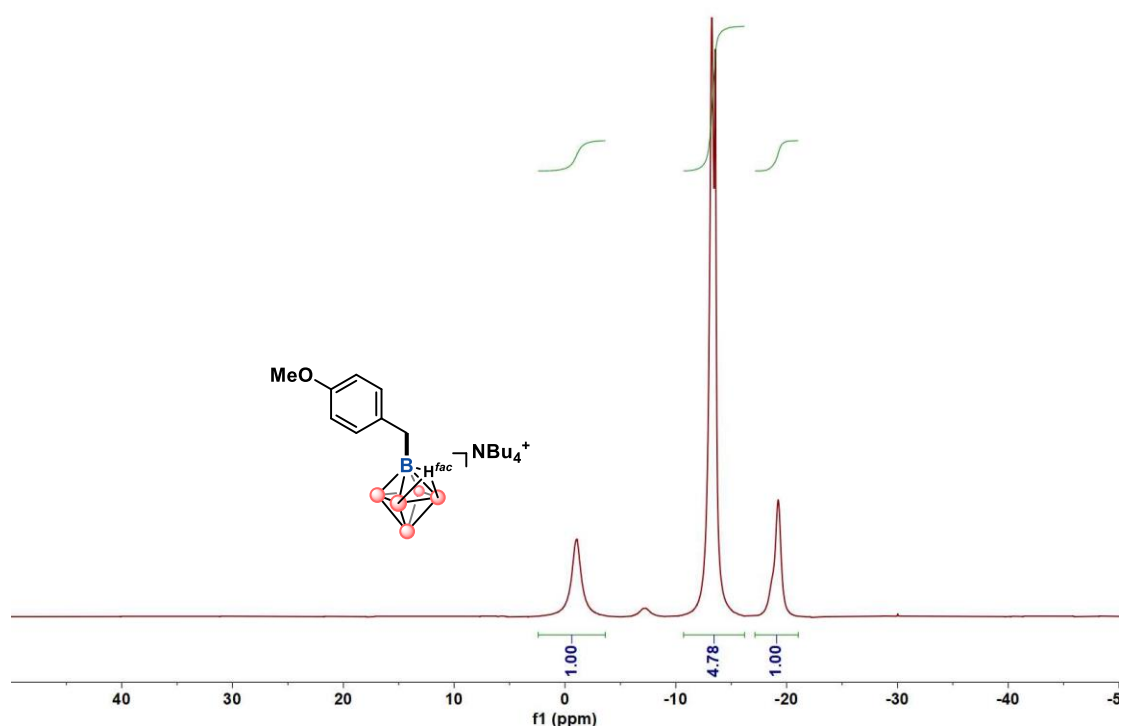

**Figure S36.**  $^{11}\text{B}\{^1\text{H}\}$  NMR spectrum after substitution step with 4-methoxybenzylchloride. The title compound after the bulk electrolysis was purified by flash column chromatography (silica gel, Petroleum: EtOAc = 20:1) to give a colorless oil.  $R_f = 0.23$  (Petroleum: EtOAc = 25:1). For method A, 25.3 mg (51%) of product was obtained.  
 $^1\text{H}$  NMR (600 MHz,  $\text{CDCl}_3$ )  $\delta$  7.10 – 7.09 (m, 2H), 6.80 – 6.78 (m, 2H), 3.77 (s, 3H), 2.23 (s, 2H), 1.23 (s, 12H).  
 $^{13}\text{C}\{^1\text{H}\}$  NMR (151 MHz,  $\text{CDCl}_3$ )  $\delta$  157.08, 130.45, 129.78, 113.73, 83.33, 55.18, 24.71.  
 The NMR spectra are consistent with literature report.<sup>15</sup> CAS registry No. 475250-52-3

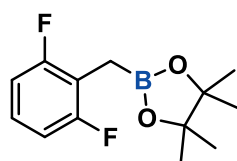

**18a**

2-(2,6-difluorobenzyl)-4,4,5,5-tetramethyl-1,3,2-dioxaborolane

**Method B** are applied. 2,6-Difluorobenzyl chloride (33.2 mg, 0.2 mmol), *t*-BuONa (19.8 mg, 0.2 mmol) and *n*-Bu<sub>4</sub>N(B<sub>6</sub>H<sub>7</sub>) (**1**) (62.8 mg, 0.2 mmol) are used for substitution step. **For method B**, the  $^{11}\text{B}$  NMR after substitution step (85% conversion):

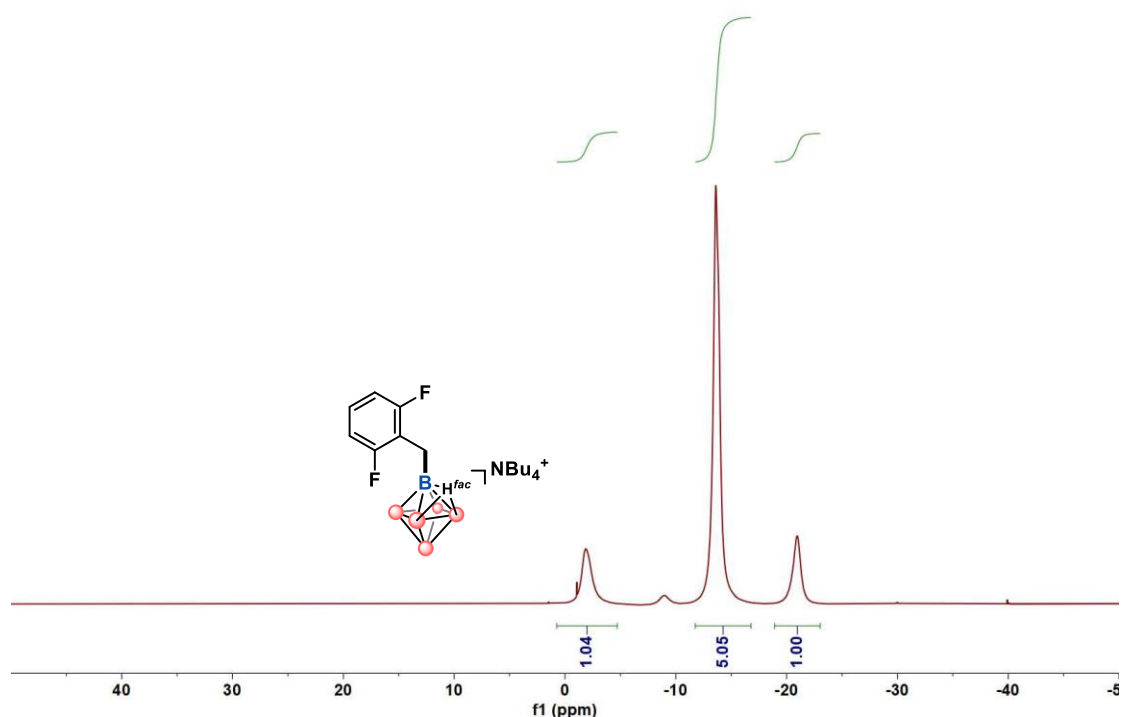

**Figure S37.**  $^{11}\text{B}\{^1\text{H}\}$  NMR spectrum after substitution step with 2,6-difluorobenzyl chloride. The title compound after the bulk electrolysis was purified by flash column chromatography (silica gel, Petroleum: EtOAc = 25:1) to give a colorless oil.  $R_f = 0.25$  (Petroleum: EtOAc = 25:1). For method A, 31.9 mg (62%) of product was obtained.

$^1\text{H}$  NMR (600 MHz,  $\text{CDCl}_3$ )  $\delta$  7.09 – 7.04 (m, 1H), 6.84 – 6.79 (m, 2H), 2.23 (s, 2H), 1.24 (s, 12H).

$^{13}\text{C}\{^1\text{H}\}$  NMR (101 MHz,  $\text{CDCl}_3$ )  $\delta$  161.36 (d,  $^1J = 244.4$  Hz), 161.3 (d,  $^1J = 244.8$  Hz), 126.09 (t,  $^3J = 10.8$  Hz), 114.04 (t,  $^2J = 21.1$  Hz), 110.66 (m,  $^2J = 20.5$  Hz), 83.68, 24.62.

The NMR spectra are consistent with literature report.<sup>12</sup> CAS registry No. 2052955-28-7

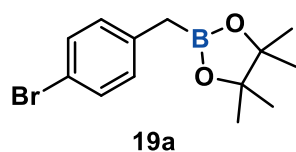

2-(4-bromobenzyl)-4,4,5,5-tetramethyl-1,3,2-dioxaborolane

**Method B** are applied. 4-Bromobenzyl chloride (41.9 mg, 0.2 mmol), *t*-BuONa (19.1 mg, 0.2 mmol) and *n*-Bu<sub>4</sub>N(B<sub>6</sub>H<sub>7</sub>) (**1**) (62.1 mg, 0.2 mmol) are used for substitution step. **For method B**, the  $^{11}\text{B}$  NMR after substitution step (75% conversion):

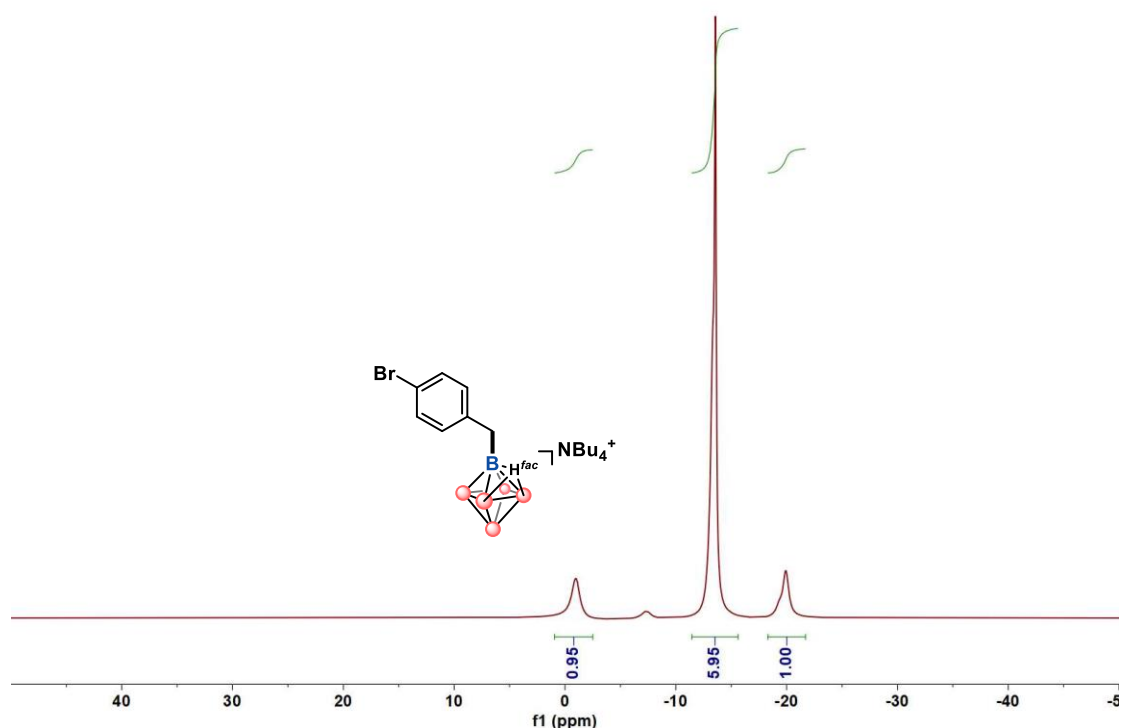

**Figure S38.**  $^{11}\text{B}\{^1\text{H}\}$  NMR spectrum after substitution step with 4-bromobenzyl chloride. The title compound after the bulk electrolysis was purified by flash column chromatography (silica gel, Petroleum: EtOAc = 25:1) to give a colorless oil.  $R_f = 0.2$  (Petroleum: EtOAc = 25:1). For method A, 25.0 mg (42%) of product was obtained.  
 $^1\text{H}$  NMR (600 MHz,  $\text{CDCl}_3$ )  $\delta$  7.35 – 7.33 (m, 2H), 7.06 – 7.04 (m, 2H), 2.23 (s, 2H), 1.23 (s, 12H).  
 $^{13}\text{C}\{^1\text{H}\}$  NMR (151 MHz,  $\text{CDCl}_3$ )  $\delta$  137.68, 131.22, 130.71, 118.54, 83.55, 24.69.  
 The NMR spectra are consistent with literature report.<sup>3</sup> CAS registry No. 477841-90-0

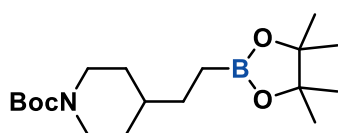

**20a**

1-Piperidinecarboxylic acid, 4-[2-(4,4,5,5-tetramethyl-1,3,2-dioxaborolan-2-yl)ethyl]-, 1,1-di methylethyl ester

**Method C** are applied. N-tert-butoxycarbonyl-4-[2-(4-toluenesulfonyloxy)ethyl] (76.8 mg, 0.2 mmol), *t*-BuONa (19.2 mg, 0.2 mmol) and *n*-Bu<sub>4</sub>N(B<sub>6</sub>H<sub>7</sub>) (**1**) (62.8 mg, 0.2 mmol) are used for substitution step. **For method C**, the  $^{11}\text{B}$  NMR after substitution step (83% conversion):

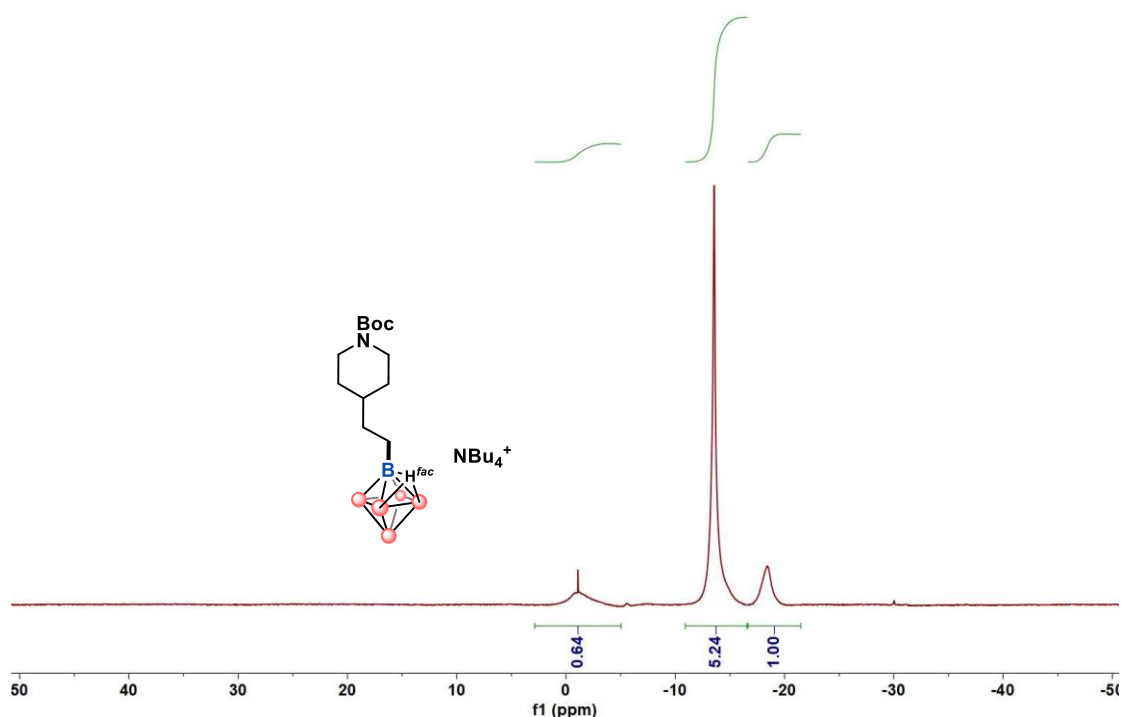

**Figure S39.**  $^{11}\text{B}\{^1\text{H}\}$  NMR spectrum after substitution step with N-tert-butoxycarbonyl-4-[2-(4-toluenesulfonyloxy)ethyl].

The title compound after the bulk electrolysis was purified by flash column chromatography (silica gel, Petroleum: EtOAc = 10:1) to give a colorless oil.  $R_f$  = 0.45 (Petroleum: EtOAc = 10:1). For method A, 27.1 mg (40%) of product was obtained.

$^1\text{H}$  NMR (400 MHz,  $\text{CDCl}_3$ )  $\delta$  4.05 (s, 2H), 2.67 – 2.61 (m, 2H), 1.72 – 1.59 (m, 3H), 1.44 (s, 9H), 1.37 – 1.32 (m, 2H), 1.24 (s, 12H), 1.08 – 0.98 (m, 2H), 0.78 – 0.74 (m, 2H).

$^{13}\text{C}\{^1\text{H}\}$  NMR (101 MHz,  $\text{CDCl}_3$ )  $\delta$  154.92, 82.94, 79.07, 44.01, 38.18, 31.77, 30.43, 28.44, 24.77.

$^{11}\text{B}\{^1\text{H}\}$  NMR (193 MHz,  $\text{CDCl}_3$ )  $\delta$  34.21.

HR-MS (EI) for  $\text{C}_{18}\text{H}_{34}^{11}\text{BNO}_4$  [M]  $m/z$  [M] $^+$ : calculated: 339.2581, found: 339.2583

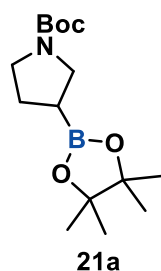

1-Boc-pyrrolidine-3-boronic acid pinacol ester

**Method C** are applied. 1-Boc-3-tosyloxypyrrolidine (69.0 mg, 0.2 mmol), *t*-BuONa (19.2 mg, 0.2 mmol) and *n*-Bu<sub>4</sub>N(B<sub>6</sub>H<sub>7</sub>) (**1**) (62.2 mg, 0.2 mmol) are used for substitution step. **For method C**, the  $^{11}\text{B}$  NMR after substitution step (64% conversion):

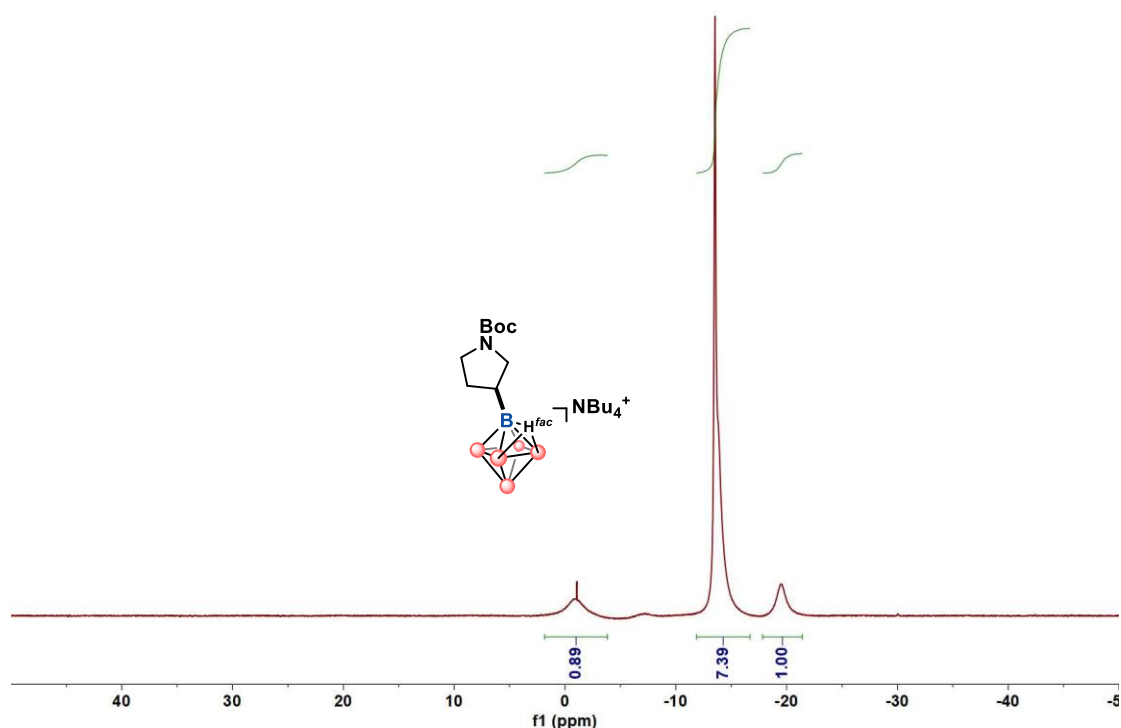

**Figure S40.**  $^{11}\text{B}\{^1\text{H}\}$  NMR spectrum after substitution step with 1-Boc-3-tosyloxypyrrolidine. The title compound after the bulk electrolysis was purified by flash column chromatography (silica gel, Petroleum: EtOAc = 7:1) to give a colorless oil.  $R_f = 0.51$  (Petroleum: EtOAc = 7:1). For method A, 21.8 mg (37%) of product was obtained.

$^1\text{H}$  NMR (400 MHz,  $\text{CDCl}_3$ )  $\delta$  3.54 – 3.45 (m, 2H), 3.22 – 3.15 (m, 2H), 2.02 – 1.95 (m, 1H), 1.82 – 1.72 (m, 1H), 1.57 – 1.52 (m, 1H), 1.45 (s, 9H), 1.24 (s, 12H).

$^{13}\text{C}\{^1\text{H}\}$  NMR (101 MHz,  $\text{CDCl}_3$ )  $\delta$  154.57, 83.45, 78.83, 47.90, 46.61, 28.57, 24.72.

The NMR spectra are consistent with literature report.<sup>16</sup> CAS registry No. 1312712-22-3

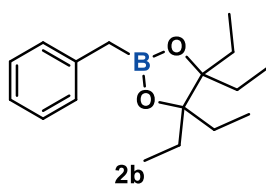

2-benzyl-4,4,5,5-tetraethyl-1,3,2-dioxaborolane

**Method E** are applied. Benzyl bromide (35.3 mg, 0.2 mmol), *t*-BuONa (19.2 mg, 0.2 mmol) and *n*-Bu<sub>4</sub>N(B<sub>6</sub>H<sub>7</sub>) (**1**) (62.7 mg, 0.2 mmol) are used for substitution step. **For method E**, the  $^{11}\text{B}$  NMR after substitution step (86% conversion):

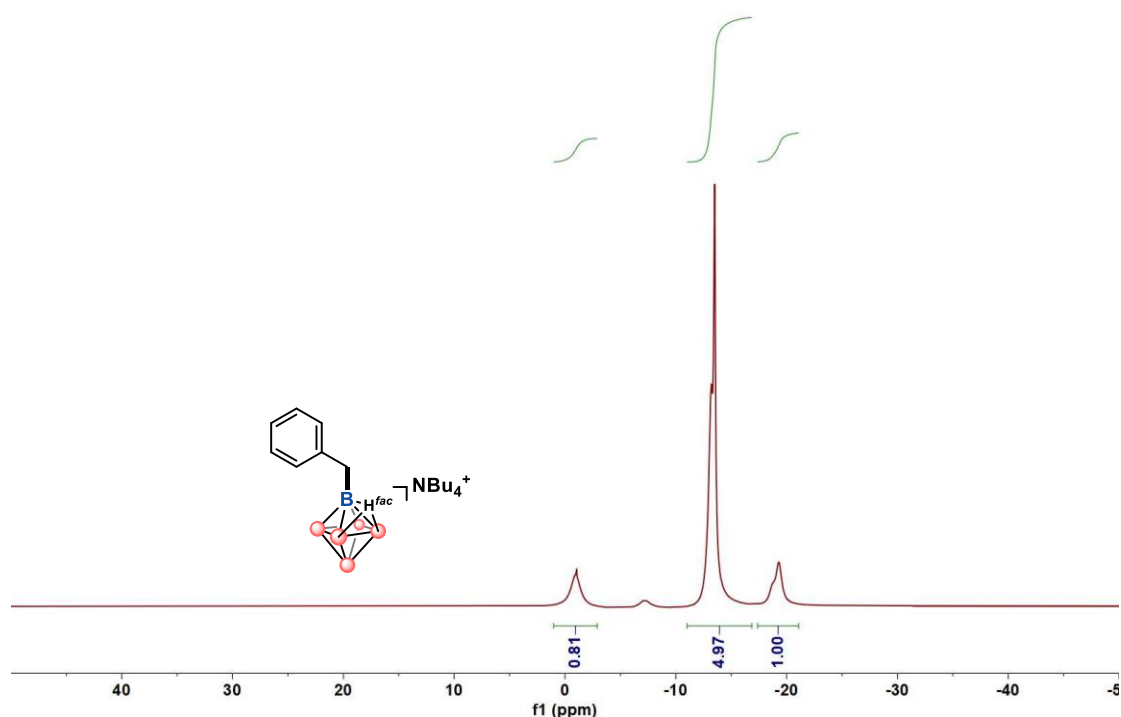

**Figure S41.**  $^{11}\text{B}\{^1\text{H}\}$  NMR spectrum after substitution step with benzyl bromide.

The title compound after the bulk electrolysis was purified by flash column chromatography (silica gel, Petroleum: EtOAc = 40:1) to give a colorless oil.  $R_f = 0.7$  (Petroleum: EtOAc = 20:1). For method E, 33.8 mg (71%) of product was obtained.

$^1\text{H}$  NMR (600 MHz,  $\text{CDCl}_3$ )  $\delta$  7.24 – 7.19 (m, 4H), 7.13 – 7.09 (m, 1H), 2.30 (s, 2H), 1.69 – 1.59 (m, 8H), 0.87 (t,  $J = 7.5$  Hz, 12H).

$^{13}\text{C}\{^1\text{H}\}$  NMR (101 MHz,  $\text{CDCl}_3$ )  $\delta$  139.03, 129.00, 128.07, 124.63, 88.41, 26.26, 8.72.

$^{11}\text{B}\{^1\text{H}\}$  NMR (193 MHz,  $\text{CDCl}_3$ )  $\delta$  32.48.

HR-MS (EI) for  $\text{C}_{17}\text{H}_{27}^{11}\text{BO}_2$  [M]  $m/z$  [M] $^+$ : calculated: 274.2104, found: 274.2106

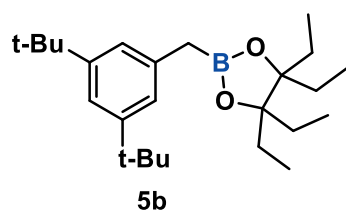

2-(3,5-di-tert-butylbenzyl)-4,4,5,5-tetraethyl-1,3,2-dioxaborolane

**Method E** are applied. 3,5-Bis(1,1-dimethylethyl)phenyl]methyl bromide (56.1 mg, 0.2 mmol), *t*-BuONa (18.9 mg, 0.2 mmol) and *n*-Bu $_4$ N(B $_6$ H $_7$ ) (**1**) (62.5 mg, 0.2 mmol) are used for substitution step. **For method E**, the  $^{11}\text{B}$  NMR after substitution step (84% conversion):

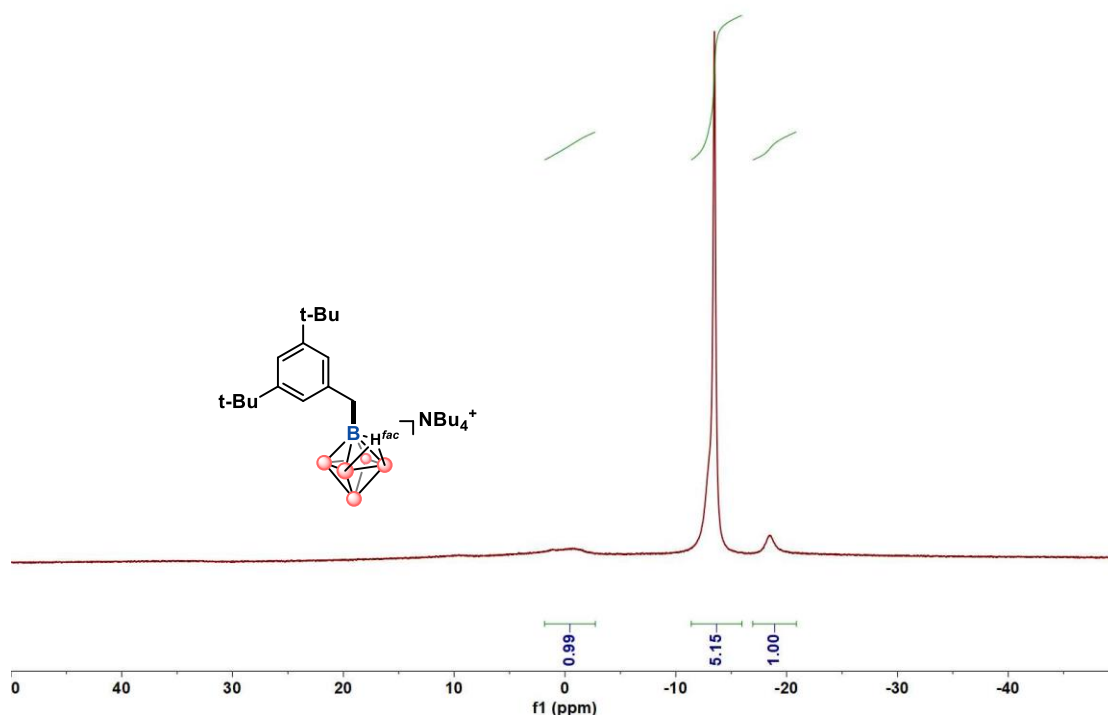

**Figure S42.**  $^{11}\text{B}\{^1\text{H}\}$  NMR spectrum after substitution step with 3,5-bis(1,1-dimethylethyl)phenyl]methyl bromide.

The title compound after the bulk electrolysis was purified by flash column chromatography (silica gel, Petroleum: Diethyl ether = 80:1) to give a colorless oil.  $R_f = 0.66$  (Petroleum: EtOAc = 20:1). For method E, 49.0 mg (63%) of product was obtained.

$^1\text{H}$  NMR (400 MHz,  $\text{CDCl}_3$ )  $\delta$  7.17 – 7.16 (m, 1H), 7.07 – 7.06 (m, 2H), 2.30 (s, 2H), 1.71 – 1.58 (m, 8H), 1.31 (s, 18H), 0.89 (t,  $J = 7.5$  Hz, 12H).

$^{13}\text{C}\{^1\text{H}\}$  NMR (101 MHz,  $\text{CDCl}_3$ )  $\delta$  150.17, 137.64, 123.42, 118.60, 88.29, 34.68, 31.49, 26.26, 8.76.

$^{11}\text{B}\{^1\text{H}\}$  NMR (193 MHz,  $\text{CDCl}_3$ )  $\delta$  32.66.

HR-MS (EI) for  $\text{C}_{25}\text{H}_{43}^{11}\text{BO}_2$  [M]  $m/z$  [M] $^+$ : calculated: 386.3356, found: 386.3359

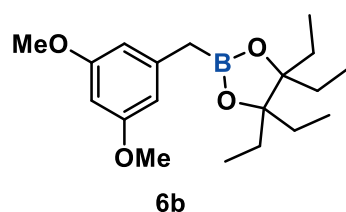

2-(3,5-dimethoxybenzyl)-4,4,5,5-tetraethyl-1,3,2-dioxaborolane

**Method E** are applied. 3,5-Dimethoxybenzyl bromide (48.5 mg, 0.2 mmol), *t*-BuONa (18.5 mg, 0.2 mmol) and *n*-Bu<sub>4</sub>N(B<sub>6</sub>H<sub>7</sub>) (**1**) (61.9 mg, 0.2 mmol) are used for substitution step. **For method E**, the  $^{11}\text{B}$  NMR after substitution step (72% conversion):



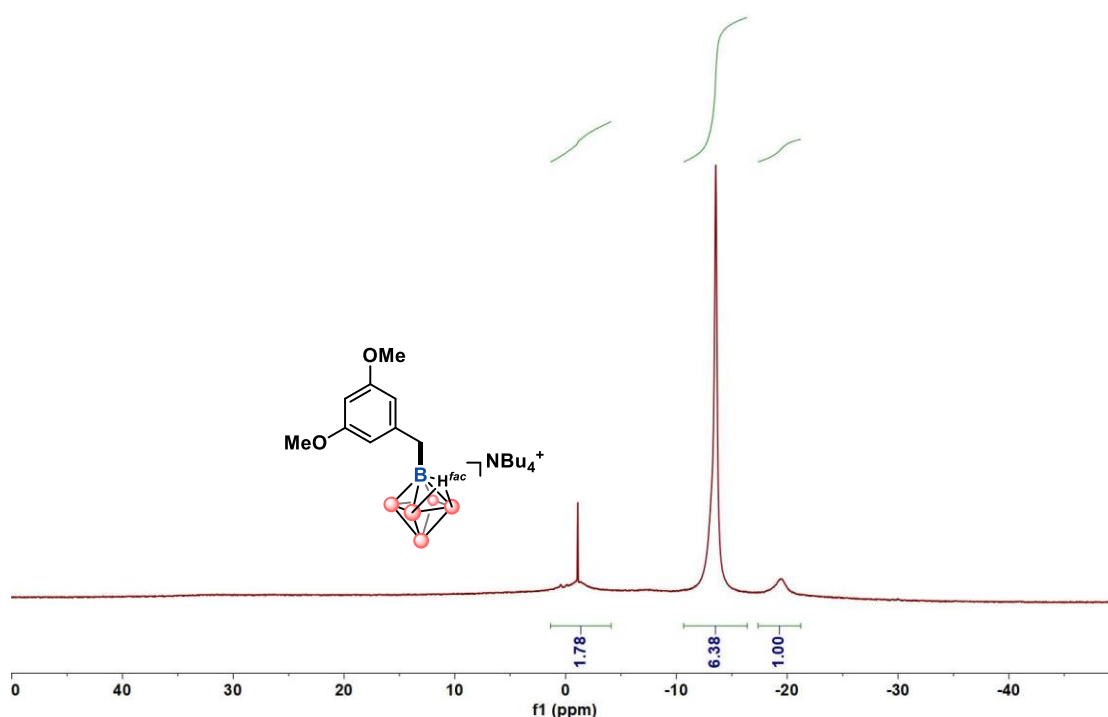

**Figure S43.**  $^{11}\text{B}\{^1\text{H}\}$  NMR spectrum after substitution step with 3,5-dimethoxybenzyl bromide.

The title compound after the bulk electrolysis was purified by flash column chromatography (silica gel, Petroleum: EtOAc = 25:1) to give a colorless oil.  $R_f$  = 0.45 (Petroleum: EtOAc = 25:1). For method E, 49.0 mg (63%) of product was obtained.

$^1\text{H}$  NMR (400 MHz,  $\text{CDCl}_3$ )  $\delta$  6.38 – 6.37 (m, 2H), 6.25 – 6.24 (m, 1H), 3.76 (s, 6H), 2.25 (s, 2H), 1.71 – 1.57 (m, 8H), 0.88 (t,  $J$  = 7.5 Hz, 12H).

$^{13}\text{C}\{^1\text{H}\}$  NMR (151 MHz,  $\text{CDCl}_3$ )  $\delta$  160.48, 141.31, 107.02, 97.28, 88.46, 55.17, 26.25, 8.75.

$^{11}\text{B}\{^1\text{H}\}$  NMR (193 MHz,  $\text{CDCl}_3$ )  $\delta$  32.36.

HR-MS (EI) for  $\text{C}_{19}\text{H}_{31}^{11}\text{BO}_4$  [M]  $m/z$  [M] $^+$ : calculated: 334.2315, found: 334.2319

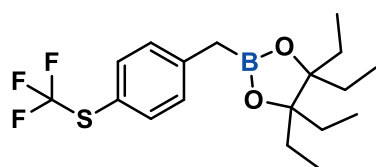

**22b**

4,4,5,5-tetraethyl-2-(4-((trifluoromethyl)thio)benzyl)-1,3,2-dioxaborolane

**Method F** are applied. 1-Bromomethyl-4-trifluoromethylsulfanylbenzene (54.8 mg, 0.2 mmol), *t*-BuONa (21.4 mg, 0.2 mmol) and *n*-Bu<sub>4</sub>N(B<sub>6</sub>H<sub>7</sub>) (**1**) (63.2 mg, 0.2 mmol) are used for substitution step. **For method F**, the  $^{11}\text{B}$  NMR after substitution step (66% conversion):

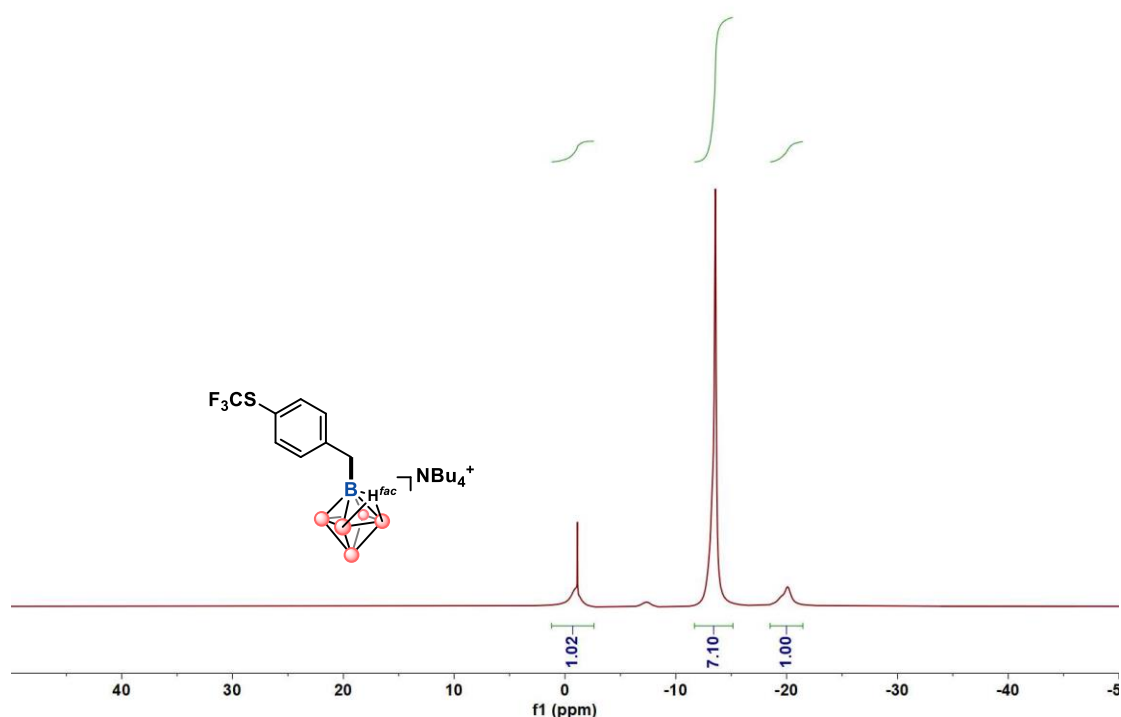

**Figure S44.**  $^{11}\text{B}\{^1\text{H}\}$  NMR spectrum after substitution step with 1-bromomethyl-4-trifluoromethylsulfanylbenzene.

The title compound after the bulk electrolysis was purified by flash column chromatography (silica gel, Petroleum: DCM = 10:1) to give a colorless oil.  $R_f = 0.88$  (Petroleum: EtOAc = 20:1). For method F, 40.4 mg (53%) of product was obtained.

$^1\text{H}$  NMR (400 MHz,  $\text{CDCl}_3$ )  $\delta$  7.51 – 7.49 (m, 2H), 7.25 – 7.23 (m, 2H), 2.33 (s, 2H), 1.70 – 1.56 (m, 8H), 0.86 (t,  $J = 7.5$  Hz, 12H).

$^{13}\text{C}\{^1\text{H}\}$  NMR (151 MHz,  $\text{CDCl}_3$ )  $\delta$  142.92, 136.28, 130.13, 129.69(q,  $^1J = 307.4$  Hz,  $\text{CF}_3$ ), 119.95(q,  $^3J = 2.2$  Hz), 88.71, 29.70, 26.26, 8.68.

$^{19}\text{F}\{^1\text{H}\}$  NMR (565 MHz,  $\text{CDCl}_3$ )  $\delta$  -43.31.

$^{11}\text{B}\{^1\text{H}\}$  NMR (193 MHz,  $\text{CDCl}_3$ )  $\delta$  32.30.

HR-MS (EI) for  $\text{C}_{18}\text{H}_{26}^{11}\text{BF}_3\text{O}_2\text{S}$  [M]  $m/z$  [M] $^+$ : calculated: 374.1699, found: 374.1697

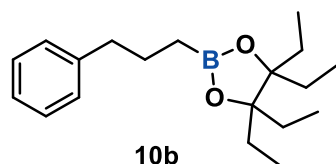

4,4,5,5-tetraethyl-2-(3-phenylpropyl)-1,3,2-dioxaborolane

**Method E** are applied. 1-Bromo-3-phenylpropane (41.0 mg, 0.2 mmol), *t*-BuONa (19.4 mg, 0.2 mmol) and *n*-Bu<sub>4</sub>N(B<sub>6</sub>H<sub>7</sub>) (**1**) (61.7 mg, 0.2 mmol) are used for substitution step. **For method E**, the  $^{11}\text{B}$  NMR after substitution step (77% conversion):

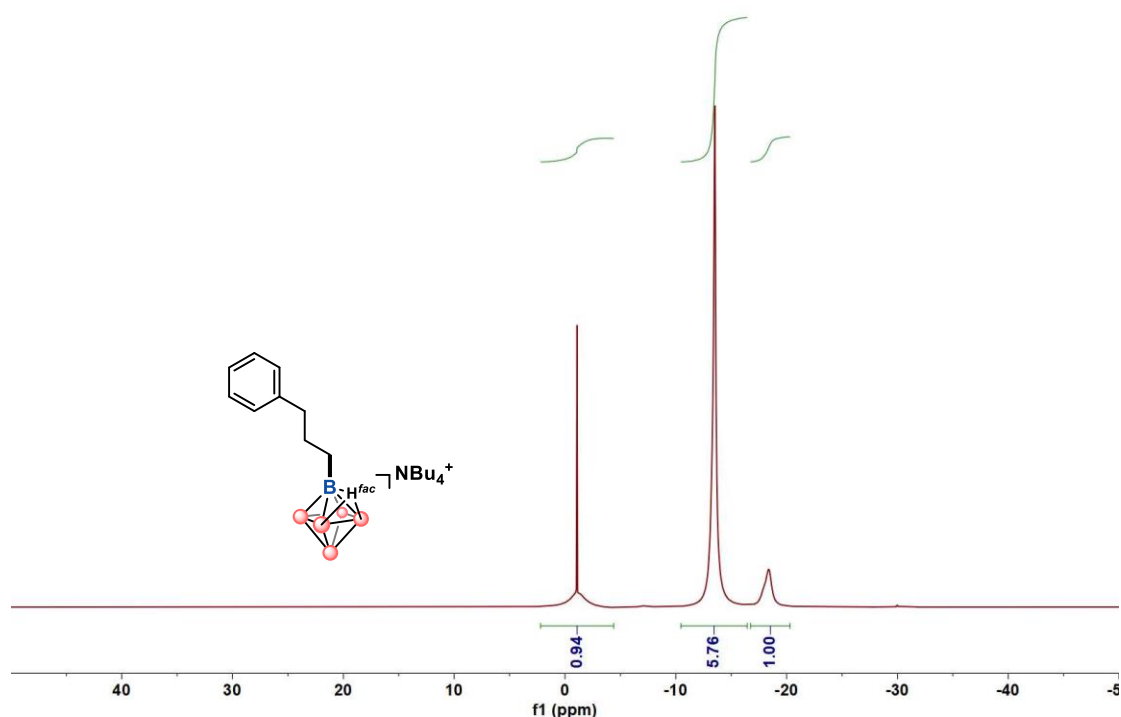

**Figure S45.**  $^{11}\text{B}\{^1\text{H}\}$  NMR spectrum after substitution step with 1-bromo-3-phenylpropane. The title compound after the bulk electrolysis was purified by flash column chromatography (silica gel, Petroleum: Diethyl ether = 80:1) to give a colorless oil.  $R_f = 0.7$  (Petroleum: EtOAc = 20:1). For method E, 34.2 mg (57%) of product was obtained.

$^1\text{H}$  NMR (400 MHz,  $\text{CDCl}_3$ )  $\delta$  7.29 – 7.24 (m, 2H), 7.20 – 7.14 (m, 3H), 2.64 – 2.60 (m, 2H), 1.78 – 1.71 (m, 2H), 1.71 – 1.59 (m, 8H), 0.92 (t,  $J = 7.5$  Hz, 12H), 0.84 (t,  $J = 7.7$  Hz, 2H).

$^{13}\text{C}\{^1\text{H}\}$  NMR (101 MHz,  $\text{CDCl}_3$ )  $\delta$  142.87, 128.54, 128.14, 125.51, 87.94, 38.63, 26.36, 8.80.

$^{11}\text{B}\{^1\text{H}\}$  NMR (193 MHz,  $\text{CDCl}_3$ )  $\delta$  33.51.

HR-MS (EI) for  $\text{C}_{19}\text{H}_{31}^{11}\text{BO}_2$  [M]  $m/z$  [M] $^+$ : calculated: 302.2417, found: 302.2419

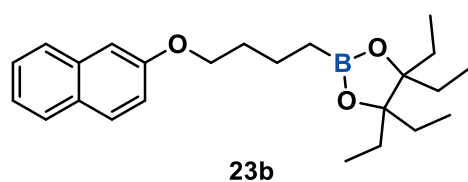

4,4,5,5-tetraethyl-2-(4-(naphthalen-2-yloxy)butyl)-1,3,2-dioxaborolane

**Method E** are applied. 2-(4-Bromobutoxy)naphthalene (57.1 mg, 0.2 mmol), *t*-BuONa (20.7 mg, 0.2 mmol) and *n*-Bu<sub>4</sub>N(B<sub>6</sub>H<sub>7</sub>) (**1**) (62.9 mg, 0.2 mmol) are used for substitution step. **For method E**, the  $^{11}\text{B}$  NMR after substitution step (76% conversion):

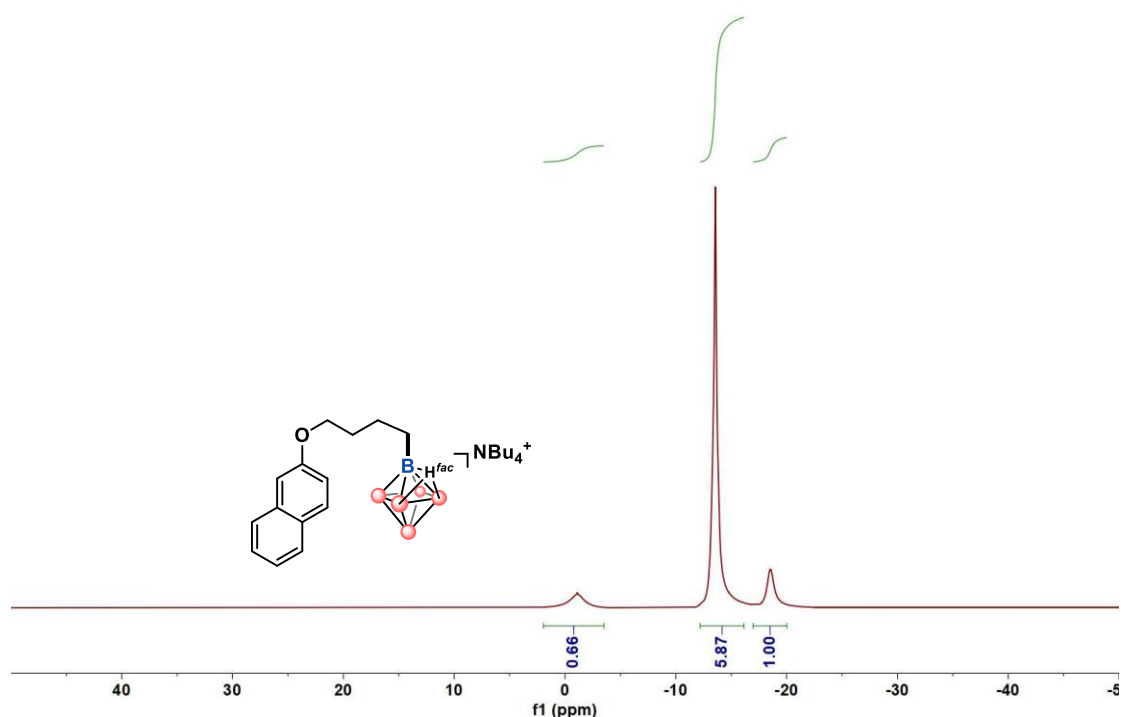

**Figure S46.**  $^{11}\text{B}\{^1\text{H}\}$  NMR spectrum after substitution step with 2-(4-bromobutoxy)naphthalene.

The title compound after the bulk electrolysis was purified by flash column chromatography (silica gel, Petroleum: Diethyl ether = 80:1) to give a colorless oil.  $R_f = 0.8$  (Petroleum: EtOAc = 20:1). For method E, 49.1 mg (64%) of product was obtained.

$^1\text{H}$  NMR (400 MHz,  $\text{CDCl}_3$ )  $\delta$  7.77 – 7.70 (m, 3H), 7.45 – 7.40 (m, 1H), 7.34 – 7.30 (m, 1H), 7.16 – 7.12 (m, 2H), 4.08 (t,  $J = 6.6$  Hz, 2H), 1.90 – 1.86 (m, 2H), 1.72 – 1.60 (m, 10H), 0.94 – 0.87 (m, 14H).

$^{13}\text{C}\{^1\text{H}\}$  NMR (101 MHz,  $\text{CDCl}_3$ )  $\delta$  157.12, 134.61, 129.20, 128.81, 127.58, 126.66, 126.19, 123.35, 119.08, 106.49, 88.00, 67.83, 31.76, 26.36, 20.81, 8.80.

$^{11}\text{B}\{^1\text{H}\}$  NMR (193 MHz,  $\text{CDCl}_3$ )  $\delta$  33.49.

HR-MS (EI) for  $\text{C}_{24}\text{H}_{35}^{11}\text{BO}_3$  [M]  $m/z$  [M] $^+$ : calculated: 382.2679, found: 382.2675

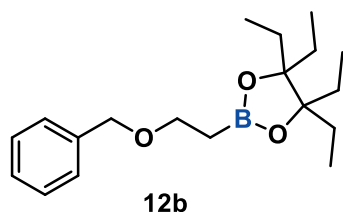

2-(2-(benzyloxy)ethyl)-4,4,5,5-tetraethyl-1,3,2-dioxaborolane

**Method E** are applied. Benzyl 2-bromoethyl ether (43.7 mg, 0.2 mmol), *t*-BuONa (19.0 mg, 0.2 mmol) and *n*-Bu<sub>4</sub>N(B<sub>6</sub>H<sub>7</sub>) (**1**) (61.2 mg, 0.2 mmol) are used for substitution step. **For method E**, the  $^{11}\text{B}$  NMR after substitution step (66% conversion):

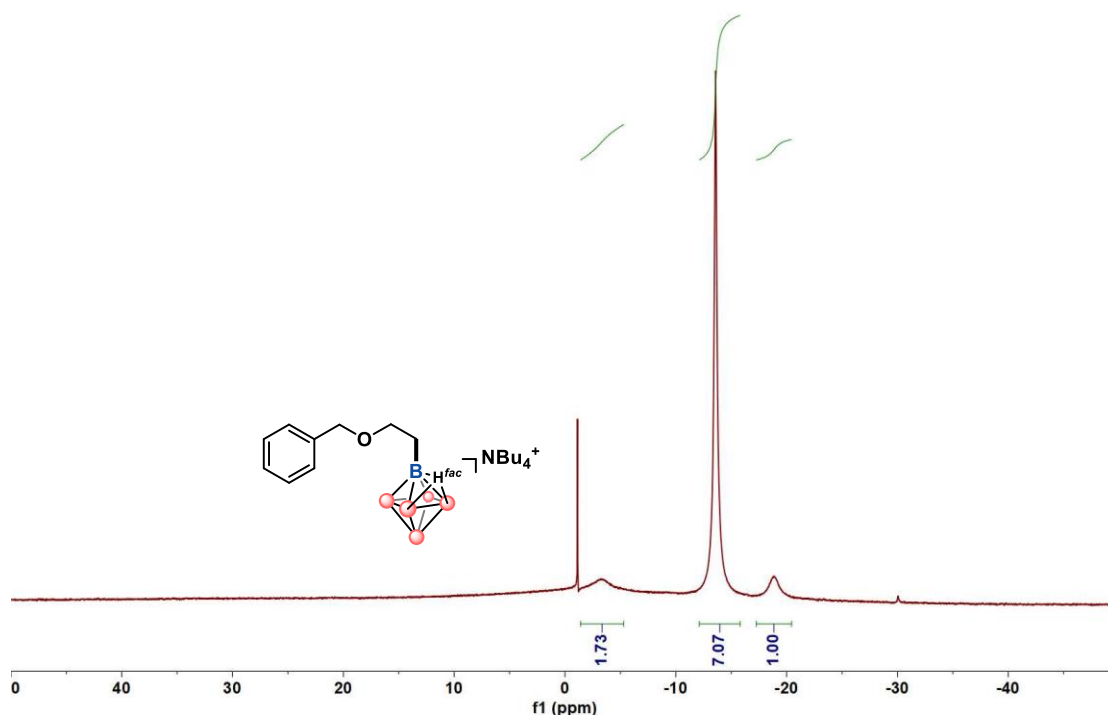

**Figure S47.**  $^{11}\text{B}\{^1\text{H}\}$  NMR spectrum after substitution step with benzyl 2-bromoethyl ether. The title compound after the bulk electrolysis was purified by flash column chromatography (silica gel, Petroleum: EtOAc = 30:1) to give a colorless oil.  $R_f = 0.23$  (Petroleum: EtOAc = 30:1). For method E, 24.9 mg (40%) of product was obtained.

$^1\text{H}$  NMR (400 MHz,  $\text{CDCl}_3$ )  $\delta$  7.36 – 7.31 (m, 4H), 7.28 – 7.24 (m, 1H), 4.50 (s, 2H), 3.64 (t,  $J = 7.9$  Hz, 2H), 1.72 – 1.58 (m, 8H), 1.26 – 1.22 (m, 2H), 0.90 (t,  $J = 7.5$  Hz, 12H).

$^{13}\text{C}\{^1\text{H}\}$  NMR (101 MHz,  $\text{CDCl}_3$ )  $\delta$  138.83, 128.23, 127.55, 127.29, 88.17, 72.52, 67.30, 26.32, 8.76.

$^{11}\text{B}\{^1\text{H}\}$  NMR (193 MHz,  $\text{CDCl}_3$ )  $\delta$  32.79.

HR-MS (EI) for  $\text{C}_{19}\text{H}_{31}^{11}\text{BO}_3$  [M]  $m/z$  [M] $^+$ : calculated: 318.2366 found: 318.2364

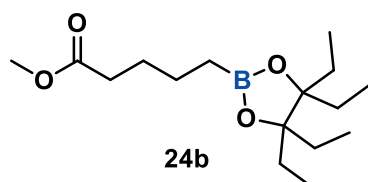

methyl 5-(4,4,5,5-tetraethyl-1,3,2-dioxaborolan-2-yl)pentanoate

**Method F** are applied. 5-Bromo-pentanoicacimethylester (38.2 mg, 0.2 mmol), *t*-BuONa (20.1 mg, 0.2 mmol) and *n*-Bu<sub>4</sub>N(B<sub>6</sub>H<sub>7</sub>) (**1**) (62.3 mg, 0.2 mmol) are used for substitution step. **For method F**, the  $^{11}\text{B}$  NMR after substitution step (46% conversion):

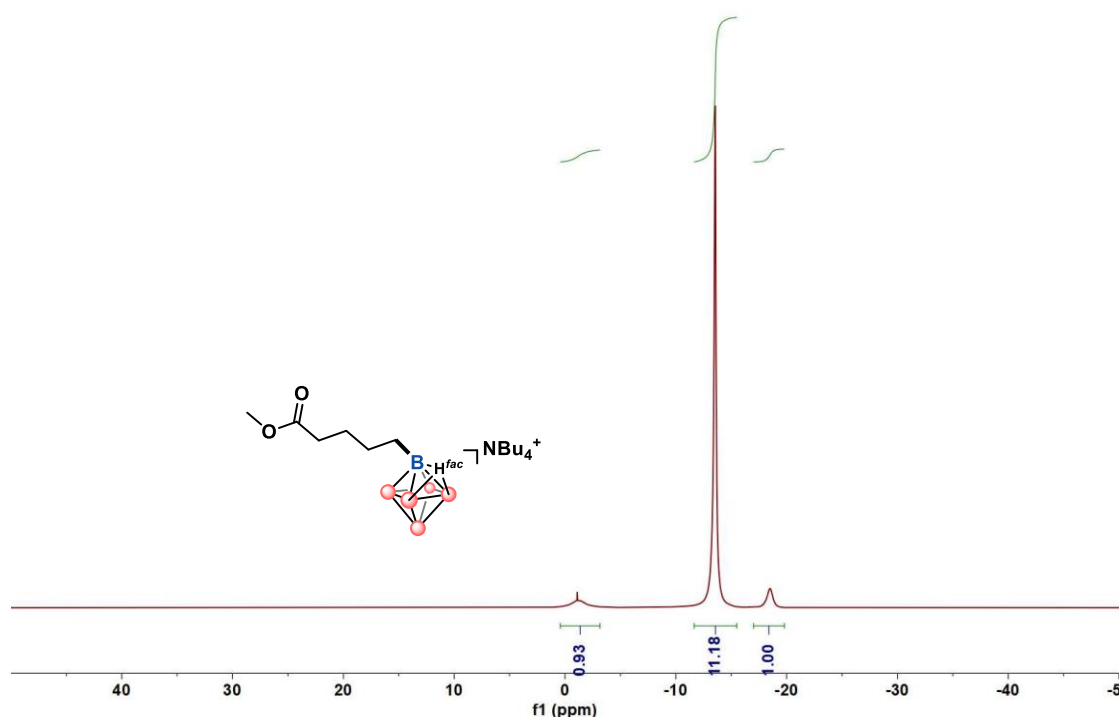

**Figure S48.**  $^{11}\text{B}\{^1\text{H}\}$  NMR spectrum after substitution step with 5-bromopentanoicacimethylester.

The title compound after the bulk electrolysis was purified by flash column chromatography (silica gel, Petroleum: EtOAc = 20:1) to give a colorless oil.  $R_f = 0.47$  (Petroleum: EtOAc = 20:1). For method F, 24.5 mg (41%) of product was obtained.

$^1\text{H}$  NMR (400 MHz,  $\text{CDCl}_3$ )  $\delta$  3.65 (s, 3H), 2.30 (t,  $J = 7.6$  Hz, 2H), 1.70 – 1.57 (m, 10H), 1.47 – 1.40 (m, 2H), 0.90 (t,  $J = 7.5$  Hz, 12H), 0.79 (t,  $J = 7.9$  Hz, 2H).

$^{13}\text{C}\{^1\text{H}\}$  NMR (101 MHz,  $\text{CDCl}_3$ )  $\delta$  174.34, 87.98, 51.39, 33.98, 27.57, 26.38, 26.35, 23.80, 8.77.

$^{11}\text{B}\{^1\text{H}\}$  NMR (193 MHz,  $\text{CDCl}_3$ )  $\delta$  33.53.

HR-MS (EI) for  $\text{C}_{14}\text{H}_{26}^{11}\text{BO}_4$  [M]  $m/z$  [M- $\text{CH}_2\text{CH}_3$ ] $^+$ : calculated: 269.1924, found: 269.1921

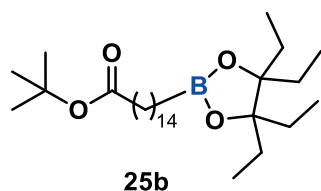

*tert*-butyl 15-(4,4,5,5-tetraethyl-1,3,2-dioxaborolan-2-yl)pentadecanoate

**Method F** are applied. *Tert*-butyl 15-bromopentadecanoate (76.0 mg, 0.2 mmol), *t*-BuONa (20.0 mg, 0.2 mmol) and *n*-Bu<sub>4</sub>N(B<sub>6</sub>H<sub>7</sub>) (**1**) (62.8 mg, 0.2 mmol) are used for substitution step. **For method F**, the  $^{11}\text{B}$  NMR after substitution step (64% conversion):

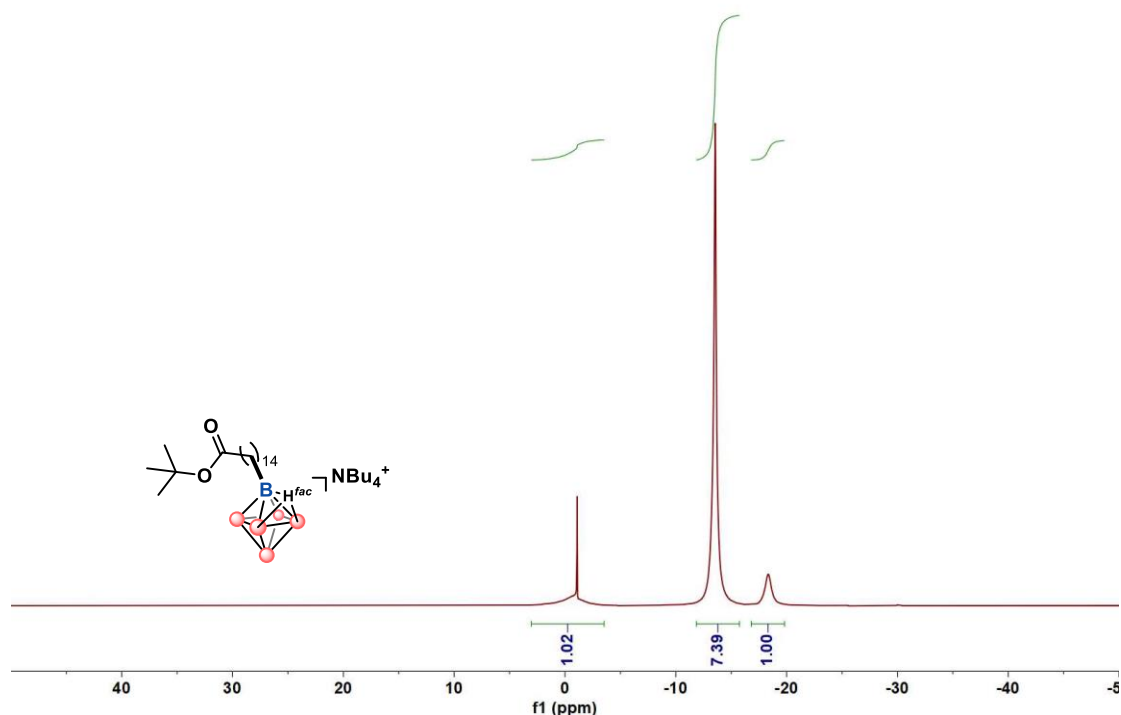

**Figure S49.**  $^{11}\text{B}\{^1\text{H}\}$  NMR spectrum after substitution step with *tert*-butyl 15-bromopentadecanoate.

The title compound after the bulk electrolysis was purified by flash column chromatography (silica gel, Petroleum: DCM = 5:1) to give a colorless oil.  $R_f = 0.33$  (Petroleum: DCM = 5:1). For method F, 37.0 mg (38%) of product was obtained.

$^1\text{H}$  NMR (400 MHz,  $\text{CDCl}_3$ )  $\delta$  2.19 (t,  $J = 7.5$  Hz, 2H), 1.70 – 1.61 (m, 8H), 1.58 – 1.53 (m, 2H), 1.44 (s, 9H), 1.42 – 1.37 (m, 2H), 1.28 – 1.24 (m, 20H), 0.90 (t,  $J = 7.5$  Hz, 12H), 0.76 (t,  $J = 7.7$  Hz, 2H).

$^{13}\text{C}\{^1\text{H}\}$  NMR (151 MHz,  $\text{CDCl}_3$ )  $\delta$  173.37, 87.81, 79.86, 35.63, 32.45, 29.66, 29.60, 29.48, 29.45, 29.30, 29.09, 28.10, 26.34, 25.12, 24.21, 8.79.

$^{11}\text{B}\{^1\text{H}\}$  NMR (193 MHz,  $\text{CDCl}_3$ )  $\delta$  31.12.

HR-MS (ESI) for  $\text{C}_{29}\text{H}_{57}^{11}\text{BO}_4\text{Na}$  [M]  $m/z$  [M+Na] $^+$ : calculated: 503.4248, found: 503.4245

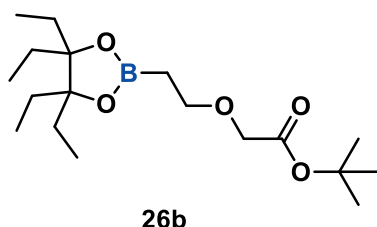

*tert*-butyl 2-(2-(4,4,5,5-tetraethyl-1,3,2-dioxaborolan-2-yl)ethoxy)acetate

**Method I** are applied. *Tert*-butyl 2-(2-bromoethoxy)acetate (48.3 mg, 0.2 mmol), *t*-BuONa (32.4 mg, 0.3 mmol) and *n*-Bu<sub>4</sub>N(B<sub>6</sub>H<sub>7</sub>) (**1**) (92.6 mg, 0.3 mmol) are used for substitution step. **For method I**, the  $^{11}\text{B}$  NMR after substitution step (52% conversion):

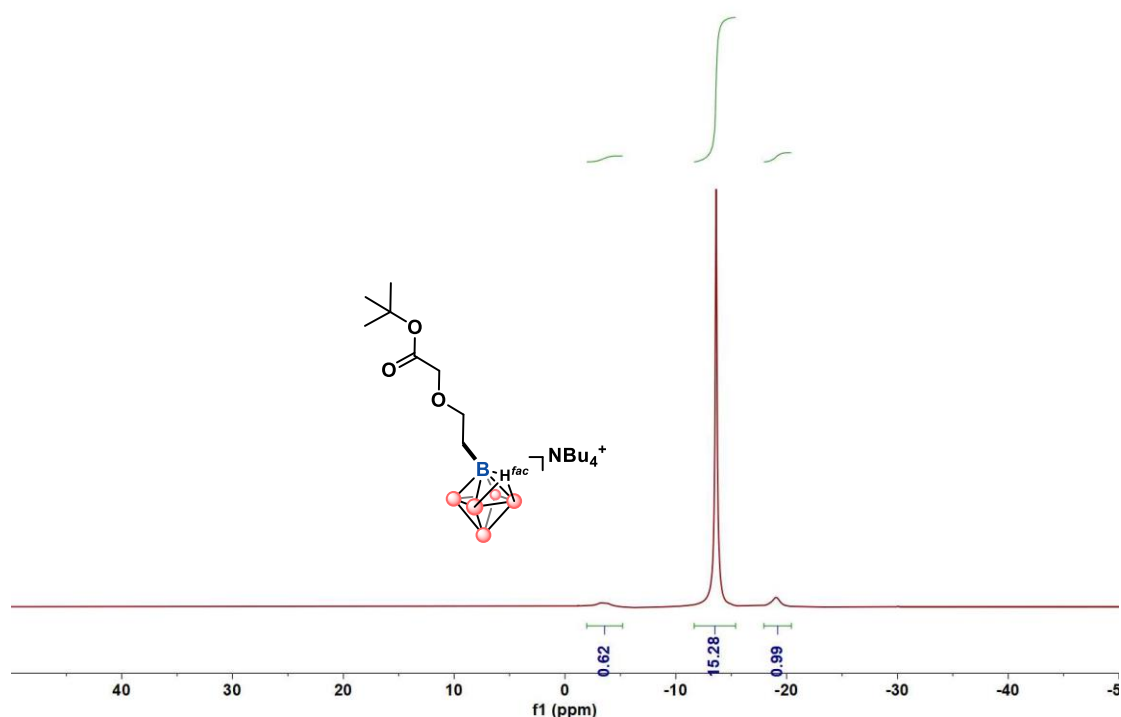

**Figure S50.**  $^{11}\text{B}\{^1\text{H}\}$  NMR spectrum after substitution step with *tert*-butyl 2-(2-bromoethoxy)acetate.

The title compound after the bulk electrolysis was purified by flash column chromatography (silica gel, Petroleum: EtOAc = 20:1) to give a colorless oil.  $R_f = 0.5$  (Petroleum: EtOAc = 10:1). For method I, 31.5 mg (45%) of product was obtained.

$^1\text{H}$  NMR (400 MHz,  $\text{CDCl}_3$ )  $\delta$  3.94 (s, 2H), 3.65 (t,  $J = 8.2$  Hz, 2H), 1.71 – 1.64 (m, 8H), 1.47 (s, 9H), 1.24 (t,  $J = 8.2$  Hz, 2H), 0.89 (t,  $J = 7.5$  Hz, 12H).

$^{13}\text{C}\{^1\text{H}\}$  NMR (151 MHz,  $\text{CDCl}_3$ )  $\delta$  169.90, 88.21, 81.31, 81.29, 68.48, 68.46, 28.10, 26.31, 8.76.

$^{11}\text{B}\{^1\text{H}\}$  NMR (193 MHz,  $\text{CDCl}_3$ )  $\delta$  32.61.

HR-MS (ESI) for  $\text{C}_{18}\text{H}_{35}^{11}\text{BO}_5\text{Na}$  [M]  $m/z$  [M+Na] $^+$ : calculated: 365.2475, found: 365.2477

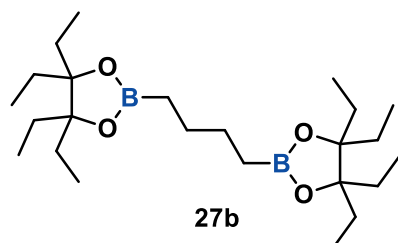

1,4-bis(4,4,5,5-tetraethyl-1,3,2-dioxaborolan-2-yl)butane

**Method G** are applied. 1,4-Dibromobutane (43.7 mg, 0.2 mmol), *t*-BuONa (38.3 mg, 0.4 mmol) and *n*-Bu $_4$ N(B $_6$ H $_7$ ) (**1**) (124.1 mg, 0.4 mmol) are used for substitution step. **For method G**, the  $^{11}\text{B}$  NMR after substitution step (>90% conversion):



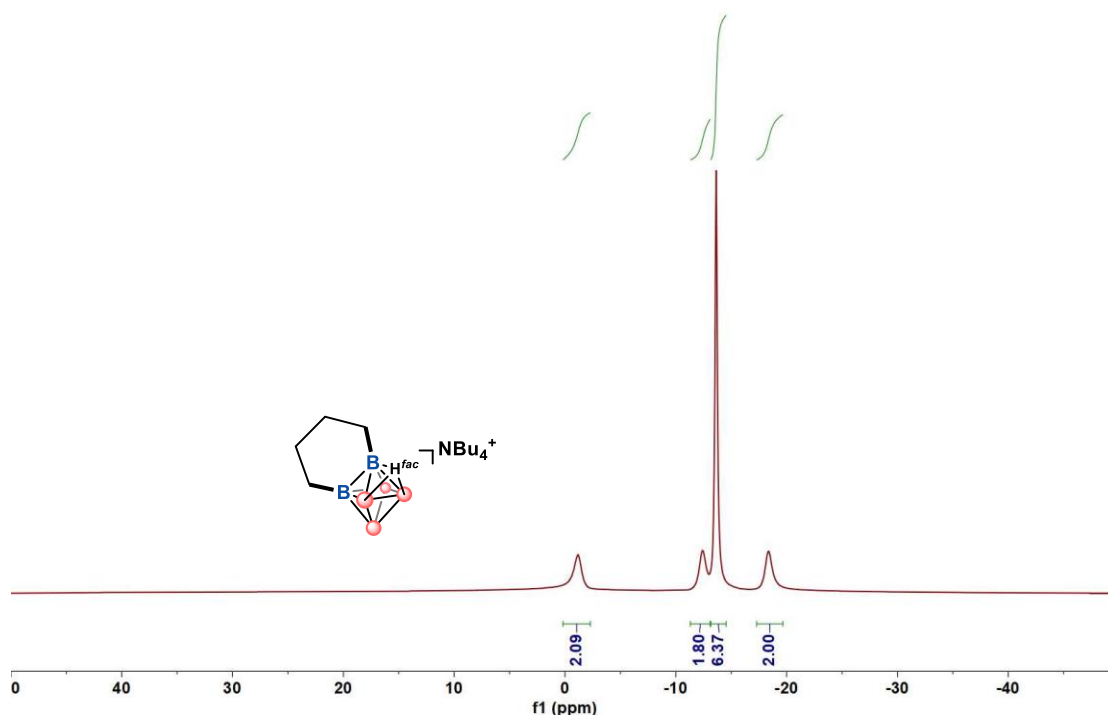

**Figure S51.**  $^{11}\text{B}\{^1\text{H}\}$  NMR spectrum after substitution step with 1,4-dibromobutane.

The title compound after the bulk electrolysis was purified by flash column chromatography (silica gel, Petroleum: Diethyl ether = 80:1) to give a colorless oil.  $R_f = 0.7$  (Petroleum: EtOAc = 20:1). For method G, 46.4 mg (54%) of product was obtained.

$^1\text{H}$  NMR (400 MHz,  $\text{CDCl}_3$ )  $\delta$  1.71 – 1.60 (m, 16H), 1.43 – 1.39 (m, 4H), 0.90 (t,  $J = 7.4$  Hz, 24H), 0.78 – 0.74 (m, 4H).

$^{13}\text{C}\{^1\text{H}\}$  NMR (101 MHz,  $\text{CDCl}_3$ )  $\delta$  87.77, 27.04, 26.35, 8.79.

$^{11}\text{B}\{^1\text{H}\}$  NMR (193 MHz,  $\text{CDCl}_3$ )  $\delta$  33.68.

HR-MS (EI) for  $\text{C}_{22}\text{H}_{43}^{11}\text{B}_2\text{O}_4$  [M]  $m/z$  [M- $\text{CH}_2\text{CH}_3$ ] $^+$ : calculated: 393.3347, found: 393.3345

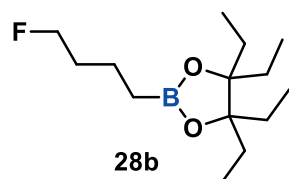

4,4,5,5-tetraethyl-2-(4-fluorobutyl)-1,3,2-dioxaborolane

**Method G** are applied. 1-Bromo-4-fluorobutane (32.0 mg, 0.2 mmol), *t*-BuONa (40.4 mg, 0.4 mmol) and *n*- $\text{Bu}_4\text{N}(\text{B}_6\text{H}_7)$  (**1**) (123.3 mg, 0.4 mmol) are used for substitution step. **For method G**, the  $^{11}\text{B}$  NMR after substitution step (95% conversion):

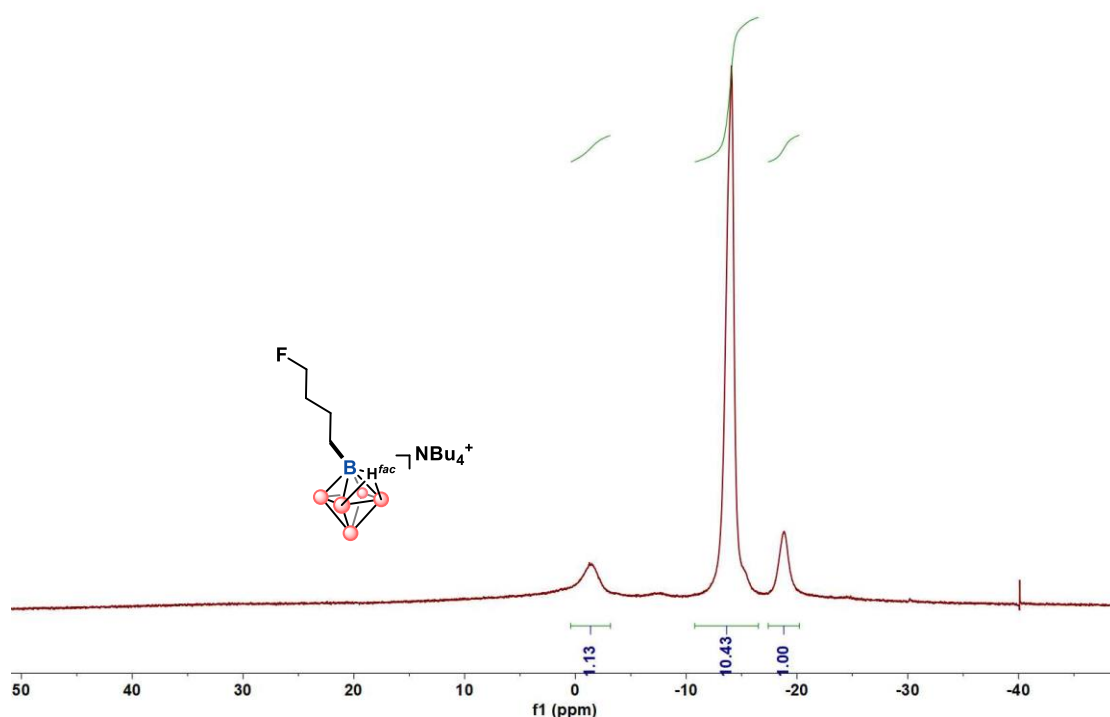

**Figure S52.**  $^{11}\text{B}\{^1\text{H}\}$  NMR spectrum after substitution step with 1-bromo-4-fluorobutane. The title compound after the bulk electrolysis was purified by flash column chromatography (silica gel, Petroleum: Diethyl ether = 80:1) to give a colorless oil.  $R_f = 0.49$  (Petroleum: EtOAc = 38:1). For method G, 30.5 mg (57%) of product was obtained.

$^1\text{H}$  NMR (400 MHz,  $\text{CDCl}_3$ )  $\delta$  4.49 (t,  $J = 6.2$  Hz, 1H), 4.37 (t,  $J = 6.2$  Hz, 1H), 1.77 – 1.59 (m, 10H), 1.55 – 1.48 (m, 2H), 0.90 (t,  $J = 7.5$  Hz, 12H), 0.81 (t,  $J = 7.9$  Hz, 2H).

$^{13}\text{C}\{^1\text{H}\}$  NMR (101 MHz,  $\text{CDCl}_3$ )  $\delta$  87.99, 84.04 (d,  $^1J = 162.5$  Hz), 32.86 (d,  $^2J = 19.5$  Hz), 26.35, 19.80 (d,  $^3J = 5.7$  Hz), 8.76.

$^{19}\text{F}\{^1\text{H}\}$  NMR (376 MHz,  $\text{CDCl}_3$ )  $\delta$  -218.22.

$^{11}\text{B}\{^1\text{H}\}$  NMR (193 MHz,  $\text{CDCl}_3$ )  $\delta$  33.34.

HR-MS (EI) for  $\text{C}_{14}\text{H}_{28}^{11}\text{BFO}_2$  [M]  $m/z$  [M] $^+$ : calculated: 258.2166 found: 258.2168

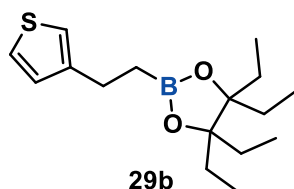

4,4,5,5-tetraethyl-2-(2-(thiophen-3-yl)ethyl)-1,3,2-dioxaborolane

**Method E** are applied. 2-(Thiophen-3-yl)ethyl 4-methylbenzenesulfonate (57.1 mg, 0.2 mmol), *t*-BuONa (18.9 mg, 0.2 mmol) and *n*-Bu<sub>4</sub>N(B<sub>6</sub>H<sub>7</sub>) (**1**) (61.6 mg, 0.2 mmol) are used for substitution step. For method E, the  $^{11}\text{B}$  NMR after substitution step (70% conversion):

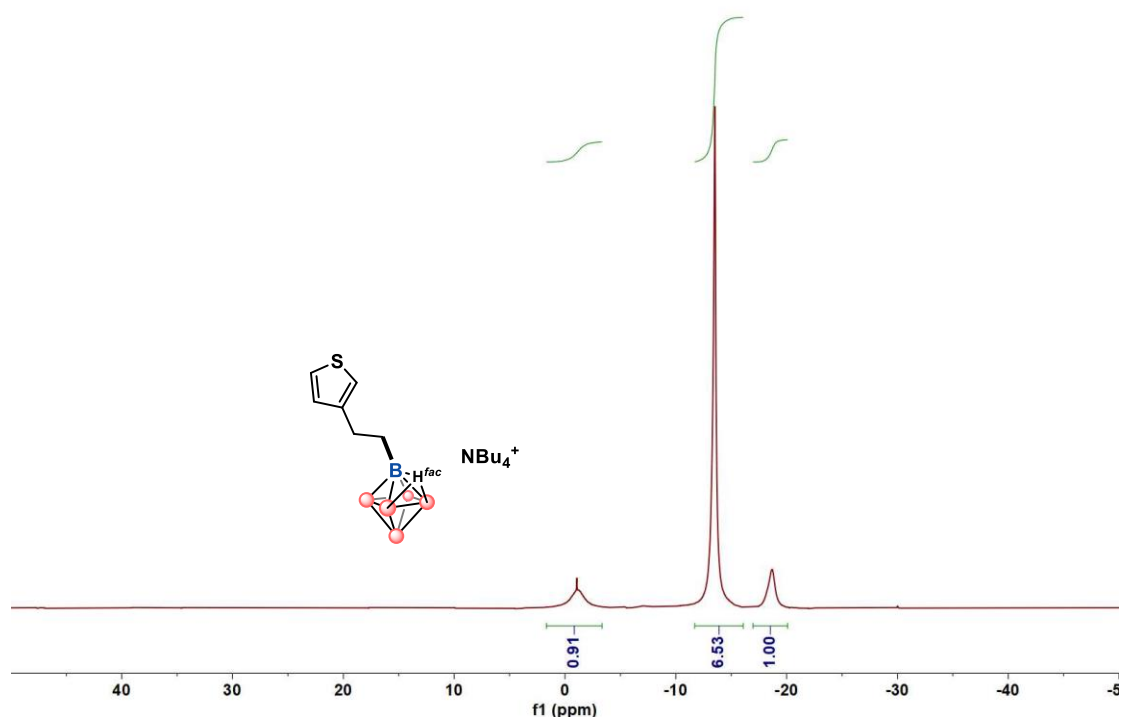

**Figure S53.**  $^{11}\text{B}\{^1\text{H}\}$  NMR spectrum after substitution step with 2-(thiophen-3-yl)ethyl 4-methylbenzenesulfonate.

The title compound after the bulk electrolysis was purified by flash column chromatography (silica gel, Petroleum: Diethyl ether = 120:1) to give a colorless oil.  $R_f = 0.14$  (Petroleum: Diethyl ether = 120:1). For method E, 23.9 mg (41%) of product was obtained.

$^1\text{H}$  NMR (400 MHz,  $\text{CDCl}_3$ )  $\delta$  7.22 – 7.20 (m, 1H), 6.97 – 6.95 (m, 1H), 6.95 – 6.93 (m, 1H), 2.76 (t, 2H), 1.69 – 1.56 (m, 8H), 1.17 (t,  $J = 7.2$  Hz, 2H), 0.88 (t,  $J = 7.4$  Hz, 12H).

$^{13}\text{C}\{^1\text{H}\}$  NMR (101 MHz,  $\text{CDCl}_3$ )  $\delta$  145.02, 128.17, 124.87, 119.27, 88.12, 26.30, 24.66, 8.75.

$^{11}\text{B}\{^1\text{H}\}$  NMR (193 MHz,  $\text{CDCl}_3$ )  $\delta$  33.23.

HR-MS (EI) for  $\text{C}_{16}\text{H}_{27}^{11}\text{BO}_2\text{S}$  [M]  $m/z$  [M] $^+$ : calculated: 294.1825 found: 294.1822

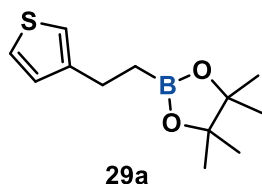

4,4,5,5-tetramethyl-2-(2-(thiophen-3-yl)ethyl)-1,3,2-dioxaborolane

**Method C** are applied. 2-(Thiophen-3-yl)ethyl 4-methylbenzenesulfonate (57.5 mg, 0.2 mmol), *t*-BuONa (19.3 mg, 0.2 mmol) and *n*-Bu<sub>4</sub>N(B<sub>6</sub>H<sub>7</sub>) (**1**) (62.6 mg, 0.2 mmol) are used for substitution step. **For method C**, the  $^{11}\text{B}$  NMR after substitution step (70% conversion):

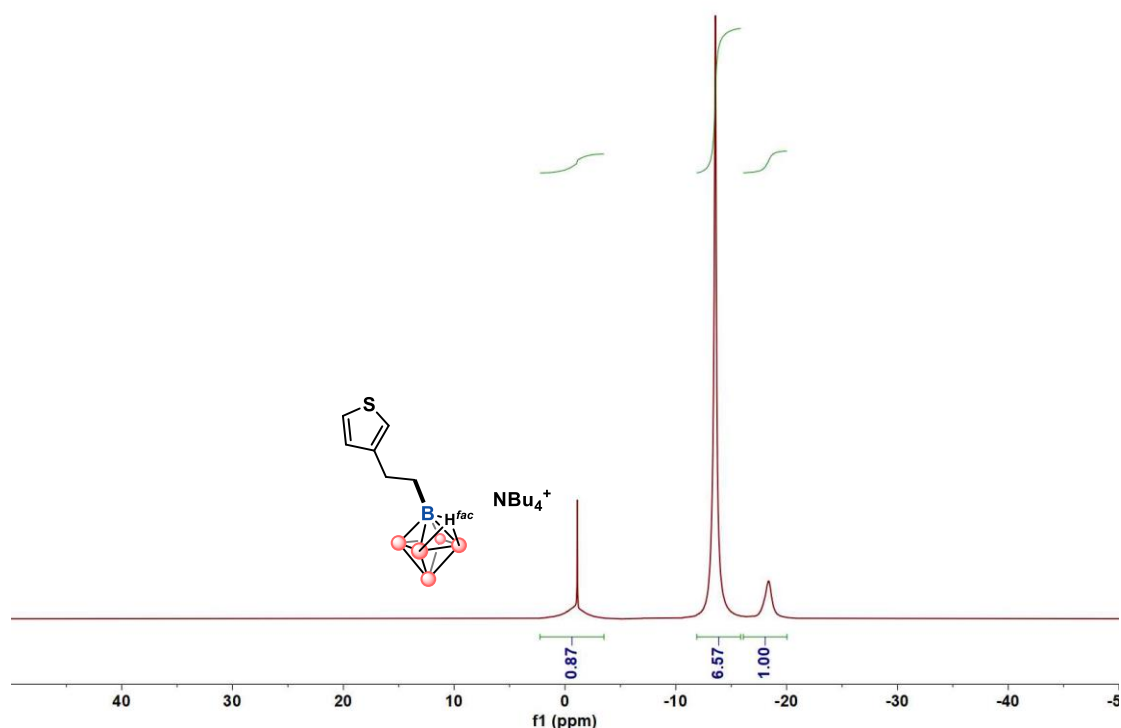

**Figure S54.**  $^{11}\text{B}\{^1\text{H}\}$  NMR spectrum after substitution step with 2-(thiophen-3-yl)ethyl 4-methylbenzenesulfonate.

The title compound after the bulk electrolysis was purified by flash column chromatography (silica gel, Petroleum: Diethyl ether = 80:1) to give a colorless oil.  $R_f = 0.78$  (Petroleum: EtOAc = 16:1). For method A, 9.3 mg (19%) of product was obtained.

$^1\text{H}$  NMR (400 MHz,  $\text{CDCl}_3$ )  $\delta$  7.21 (dd,  $J = 4.9, 3.0$  Hz, 1H), 6.97 – 6.93 (m, 2H), 2.76 (t,  $J = 8.0$  Hz, 2H), 1.22 (s, 12H), 1.17 – 1.13 (m, 2H).

$^{13}\text{C}\{^1\text{H}\}$  NMR (101 MHz,  $\text{CDCl}_3$ )  $\delta$  144.86, 128.18, 124.95, 119.40, 83.10, 24.78, 24.52.

The NMR spectra are consistent with literature report.<sup>17</sup> CAS registry No. 280563-56-6

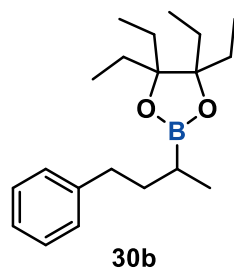

4,4,5,5-tetraethyl-2-(4-phenylbutan-2-yl)-1,3,2-dioxaborolane

**Method H** are applied. 4-Phenylbutan-2-yl 4-methylbenzenesulfonate (61.2 mg, 0.2 mmol), *t*-BuONa (28.6 mg, 0.3 mmol) and *n*-Bu<sub>4</sub>N(B<sub>6</sub>H<sub>7</sub>) (**1**) (95.0 mg, 0.3 mmol) are used for substitution step. **For method H**, the  $^{11}\text{B}$  NMR after substitution step (65% conversion):

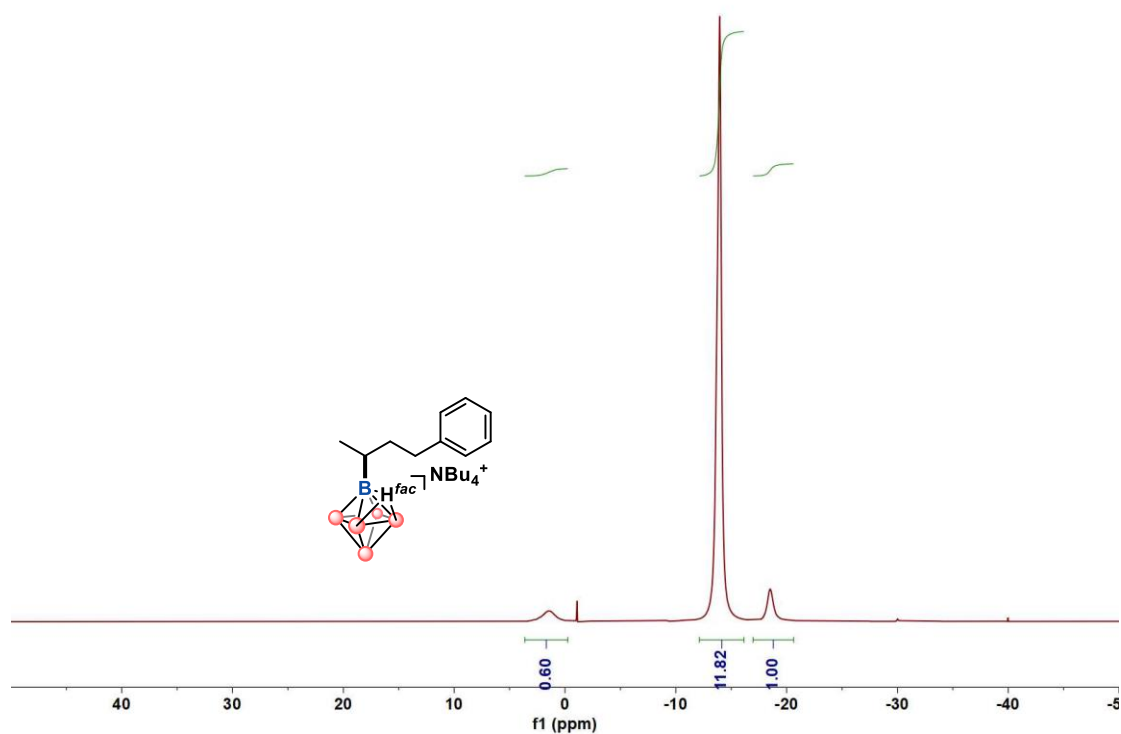

**Figure S55.**  $^{11}\text{B}\{^1\text{H}\}$  NMR spectrum after substitution step with 4-phenylbutan-2-yl 4-methylbenzenesulfonate.

The title compound after the bulk electrolysis was purified by flash column chromatography (silica gel, Petroleum: EtOAc = 60:1) to give a colorless oil.  $R_f = 0.76$  (Petroleum: EtOAc = 30:1). For method H, 28.9 mg (47%) of product was obtained.

$^1\text{H}$  NMR (400 MHz,  $\text{CDCl}_3$ )  $\delta$  7.28 – 7.25 (m, 2H), 7.20 – 7.14 (m, 3H), 2.63 (t,  $J = 8.2$  Hz, 2H), 1.82 – 1.73 (m, 1H), 1.73 – 1.61 (m, 8H), 1.59 – 1.54 (m, 1H), 1.10 – 1.06 (m, 1H), 1.05 – 1.00 (m, 3H), 0.94 – 0.90 (m, 12H).

$^{13}\text{C}\{^1\text{H}\}$  NMR (151 MHz,  $\text{CDCl}_3$ )  $\delta$  143.30, 128.43, 128.17, 125.44, 87.87, 35.52, 35.32, 26.31, 26.26, 15.78, 8.81, 8.77.

$^{11}\text{B}\{^1\text{H}\}$  NMR (193 MHz,  $\text{CDCl}_3$ )  $\delta$  33.96.

HR-MS (EI) for  $\text{C}_{20}\text{H}_{33}^{11}\text{BO}_2$  [M]  $m/z$  [M] $^+$ : calculated: 316.2574 found: 316.2576

## 8. Substitutions of chiral electrophiles, electrochemical deconstruction procedures and characterization data

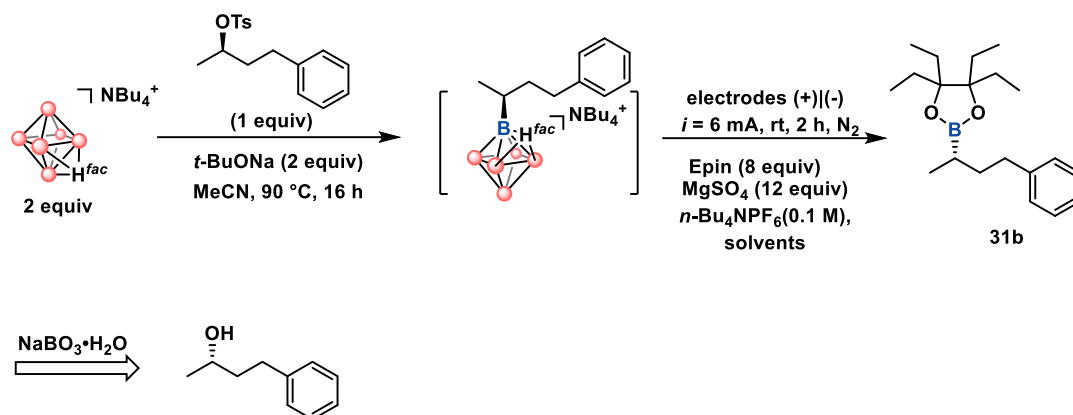

To a 10 mL oven dried Schlenk tube equipped with a magnetic stir bar, *n*-Bu<sub>4</sub>N(B<sub>6</sub>H<sub>7</sub>) (**1**) (124.8 mg, 0.4 mmol, 2 equiv), and *t*-BuONa (37.8 mg, 0.4 mmol, 2 equiv) were added sequentially. The tube was evacuated and backfilled with N<sub>2</sub> three times. Dry MeCN (1 mL) was added via syringe. Then the solution of (*R*)-4-phenylbutan-2-yl 4-methylbenzenesulfonate (60.9 mg, 0.2 mmol, 1 equiv) in dry MeCN (1 mL) was added. The mixture was then magnetically stirred while being heated in oil bath 90 °C for 16 hours. Then the heating bath was removed and flask was cooled down to room temperature. The solvent was removed *in vacuo* and resulting oil was washed with hexane (3 mL×3), from <sup>11</sup>B NMR the conversion could be determined as 89%.

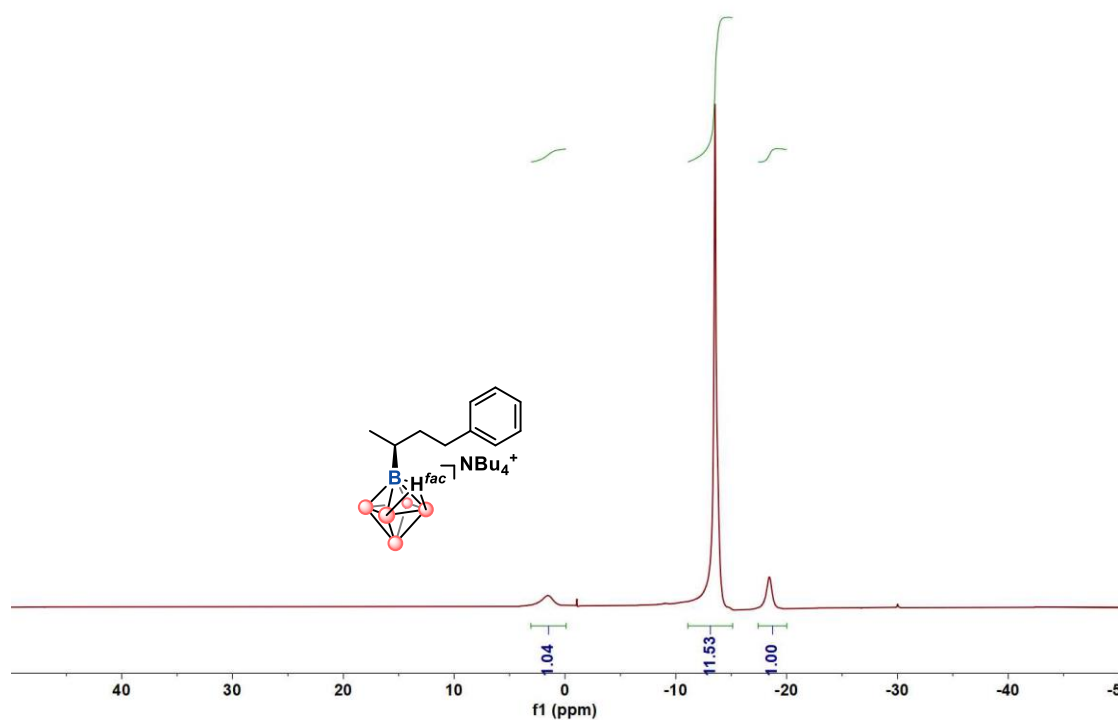

**Figure S56.** <sup>11</sup>B{<sup>1</sup>H} NMR spectrum after substitution step with (*R*)-4-phenylbutan-2-yl 4-methylbenzenesulfonate.

**Electrolysis set up 1 (IKA: ElectraSyn 2.0)** is used. To a 5 mL electrochemical reaction cell equipped with a magnetic stir bar, 3,4-Diethyl-3,4-hexanediol (279.6mg, 1.6 mmol, 8 equiv), MgSO<sub>4</sub> (290.2 mg, 2.4 mmol, 12 equiv), and TBAPF<sub>6</sub> (114.3 mg, 0.3 mmol, 0.1 M) were added. The cell was evacuated and backfilled with N<sub>2</sub> three times. Dry MeCN (1.5 mL) was added. Then the solution of the crude product of the substituted cluster in dry TCE (1.5 mL) was added. The undivided cell was equipped with RVC (3.5 mm×0.5 mm×0.4 mm) as the anode and RVC (3.5 mm×0.5 mm×0.4 mm) as the cathode and then backfilled with N<sub>2</sub> to replace air atmosphere. The mixture was pre-stirred for five minutes, and then the reaction mixture was electrolyzed at a constant current of 6 mA until passing 2.20 F/mol of total charge (2 hours) at room temperature. The solvent was removed under reduced pressure and the residual solids were extracted with ethyl acetate (10 mL). The extract was concentrated and subjected to column separation (silica gel, Petroleum: Diethyl ether= 80:1) to afford the product (23.9 mg, [ $\alpha$ ]<sub>D</sub><sup>22.8</sup> = -0.6 (c = 0.1, CHCl<sub>3</sub>)) in 46% yield. R<sub>f</sub> = 0.64 (Petroleum: EtOAc = 30:1).

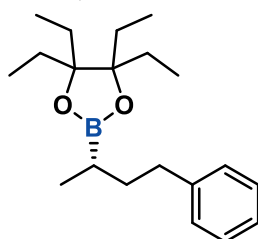

**31b**

<sup>1</sup>H NMR (400 MHz, CDCl<sub>3</sub>)  $\delta$  7.29 – 7.25 (m, 2H), 7.22 – 7.14 (m, 3H), 2.63 (t, *J* = 8.2 Hz, 2H), 1.84 – 1.73 (m, 1H), 1.73 – 1.61 (m, 8H), 1.55 – 1.53 (m, 1H), 1.13 – 1.05 (m, 1H), 1.03 – 1.01 (m, 3H), 0.95 – 0.90 (m, 12H).

<sup>13</sup>C{<sup>1</sup>H} NMR (151 MHz, CDCl<sub>3</sub>)  $\delta$  143.23, 128.43, 128.17, 125.44, 87.87, 35.52, 35.32, 26.31, 26.26, 15.78, 8.81, 8.77.

<sup>11</sup>B{<sup>1</sup>H} NMR (193 MHz, CDCl<sub>3</sub>)  $\delta$  33.94.

HR-MS (EI) for C<sub>20</sub>H<sub>33</sub><sup>11</sup>BO<sub>2</sub> [M] *m/z* [M]<sup>+</sup>: calculated: 316.2574 found: 316.2576

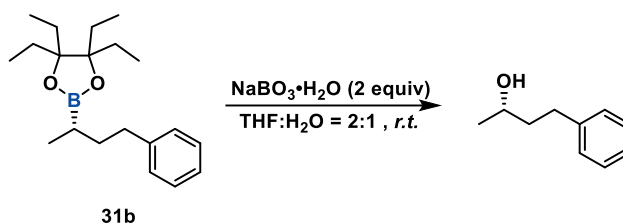

**31b**

(*S*)-4,4,5,5-tetraethyl-2-(4-phenylbutan-2-yl)-1,3,2-dioxaborolane (29.4 mg, 0.09 mmol) was dissolved in THF (1.0 mL) and transferred to 20 mL vial, then NaBO<sub>3</sub>•H<sub>2</sub>O (22.5 mg, 0.2 mmol) and H<sub>2</sub>O (0.5 mL) were added and the mixture was stirred at room temperature for 4 hours. Upon complete consumption of the substrate, the mixture was extracted with Et<sub>2</sub>O (3 mL×3) and dried over Na<sub>2</sub>SO<sub>4</sub>. Column separation (Petroleum: EtOAc =5:1) afforded a colorless oil (10.7 mg, 77%, 94:6 *e.r.*). The *e.r.* was determined on HPLC system with IB column (5% *i*-PrOH/hexanes, flow rate 1.0 mL/min, 25 °C); retention time for compound (Fig. S58): *t*<sub>1</sub> = 6.976 min (major), *t*<sub>2</sub> = 9.177 min (minor).

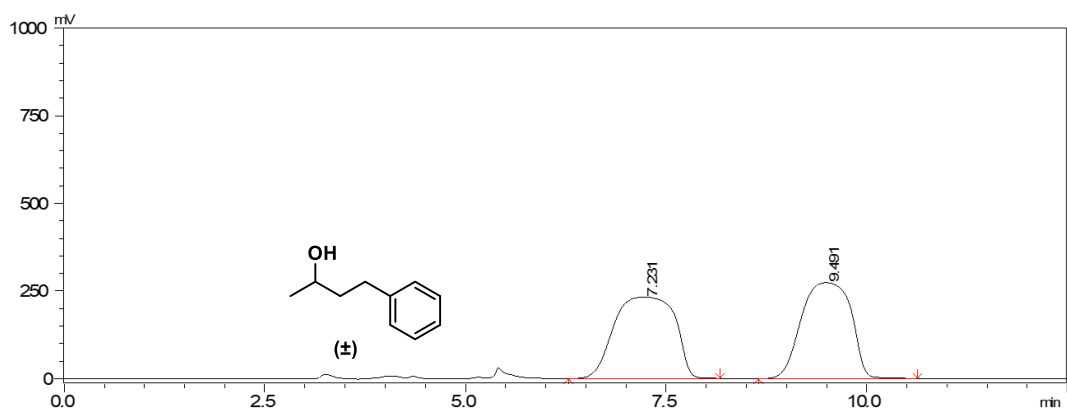

**Figure S57.** HPLC trace of 4-phenylbutan-2-ol

| #     | Ret Time (min) | Height ( $\mu\text{V}$ ) | Area ( $\mu\text{V}\cdot\text{sec}$ ) | Area (%) |
|-------|----------------|--------------------------|---------------------------------------|----------|
| 1     | 7.231          | 232369                   | 12210839                              | 50.955   |
| 2     | 9.491          | 273592                   | 11753162                              | 49.045   |
| total |                | 505961                   | 23964001                              | 100.000  |

**Table S19.** HPLC trace of 4-phenylbutan-2-ol

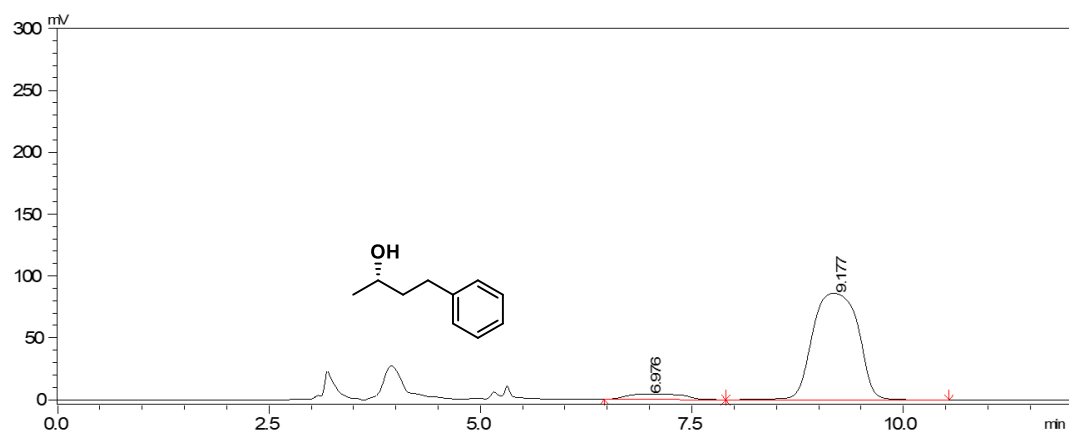

**Figure S58.** HPLC trace of (*S*)-4-phenylbutan-2-ol

| #     | Ret Time (min) | Height ( $\mu\text{V}$ ) | Area ( $\mu\text{V}\cdot\text{sec}$ ) | Area (%) |
|-------|----------------|--------------------------|---------------------------------------|----------|
| 1     | 6.976          | 4327                     | 202089                                | 5.910    |
| 2     | 9.177          | 86098                    | 3217454                               | 94.090   |
| total |                | 90426                    | 3419543                               | 100.000  |

**Table S20.** HPLC trace of (*S*)-4-phenylbutan-2-ol



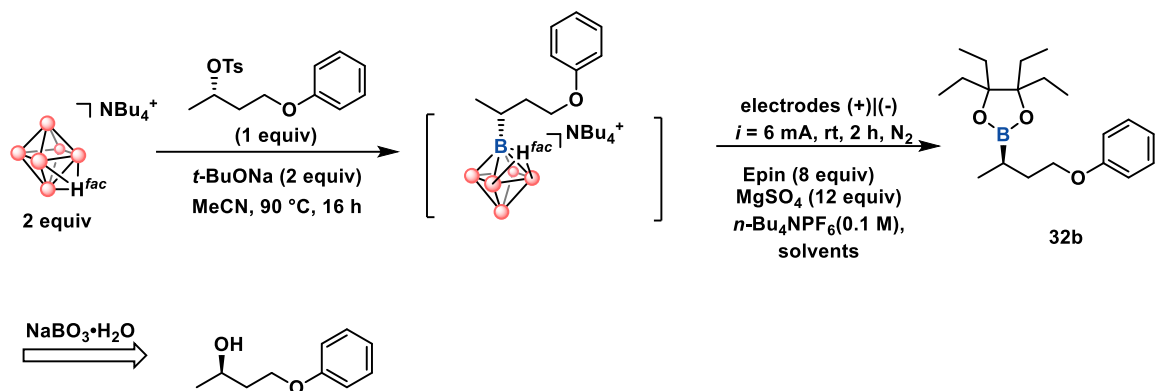

To a 10 mL oven dried Schlenk tube equipped with a magnetic stir bar, *n*-Bu<sub>4</sub>N(B<sub>6</sub>H<sub>7</sub>) (**1**) (128.7 mg, 0.4 mmol, 2 equiv), and *t*-BuONa (38.9 mg, 0.4 mmol, 2 equiv) were added sequentially. The tube was evacuated and backfilled with N<sub>2</sub> three times. Dry MeCN (1 mL) was added via syringe. Then the solution of (*S*)-4-phenoxybutan-2-yl 4-methylbenzenesulfonate (67.0 mg, 0.2 mmol, 1 equiv) in dry MeCN (1 mL) was added. The mixture was then magnetically stirred while being heated in oil bath 90 °C for 16 hours. Then the heating bath was removed and flask was cooled down to room temperature. The solvent was removed *in vacuo* and resulting oil was washed with hexane (3 mL×3), from <sup>11</sup>B NMR the conversion could be determined as 91%.

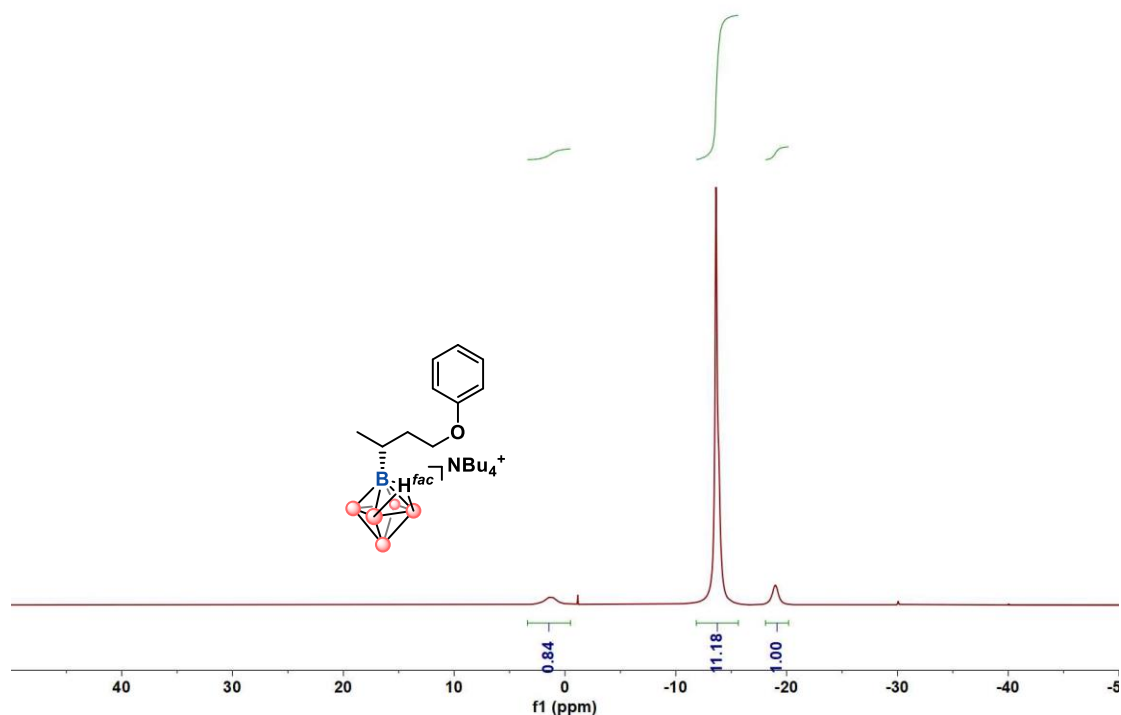

**Figure S59.** <sup>11</sup>B{<sup>1</sup>H} NMR spectrum after substitution step with (*S*)-4-phenoxybutan-2-yl 4-methylbenzenesulfonate

**Electrolysis set up 1** is used. To a 5 mL electrochemical reaction cell equipped with a magnetic stir bar, 3,4-Diethyl-3,4-hexanediol (291.1 mg, 1.6 mmol, 8 equiv), MgSO<sub>4</sub> (284.9 mg, 2.4 mmol, 12 equiv), and TBAPF<sub>6</sub> (117.1 mg, 0.3 mmol, 0.1 M) were added. The cell was evacuated and backfilled with N<sub>2</sub> three times. Dry MeCN (1.5 mL) was added. Then the solution of the

crude product of the substituted cluster in dry TCE (1.5 mL) was added. The undivided cell was equipped with RVC (3.5 mm×0.5 mm×0.4 mm) as the anode and RVC (3.5 mm×0.5 mm×0.4 mm) as the cathode and then backfilled with N<sub>2</sub> to replace air atmosphere. The mixture was pre-stirred for five minutes, and then the reaction mixture was electrolyzed at a constant current of 6 mA until passing 2.20 F/mol of total charge (2 hours) at room temperature. The solvent was removed under reduced pressure and the residual solids were extracted with ethyl acetate (10 mL). The extract was concentrated and subjected to column separation (silica gel, Petroleum: Diethyl ether= 80:1) to afforded the product (38.8 mg,  $[\alpha]_D^{22.8} = -4.8$  (c = 0.8, CHCl<sub>3</sub>)) in 56% yield.  $R_f = 0.7$  Petroleum: EtOAc = 20:1).

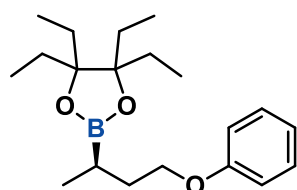

**32b**

<sup>1</sup>H NMR (400 MHz, CDCl<sub>3</sub>) δ 7.28 – 7.24 (m, 2H), 6.93 – 6.89 (m, 3H), 4.10 – 3.96 (m, 2H), 2.02 – 1.93 (m, 1H), 1.80 – 1.70 (m, 1H), 1.70 – 1.58 (m, 8H), 1.29 – 1.19 (m, 1H), 1.08 (d, *J* = 7.5 Hz, 3H), 0.88 (td, *J* = 7.5, 2.6 Hz, 12H).

<sup>13</sup>C{<sup>1</sup>H} NMR (101 MHz, CDCl<sub>3</sub>) δ 159.19, 129.31, 120.28, 114.56, 88.02, 67.28, 32.51, 26.29, 26.24, 15.79, 8.77, 8.75.

<sup>11</sup>B{<sup>1</sup>H} NMR (193 MHz, CDCl<sub>3</sub>) δ 33.76.

HR-MS (EI) for C<sub>20</sub>H<sub>33</sub><sup>11</sup>BO<sub>3</sub> [M] *m/z* [M]<sup>+</sup>: calculated: 332.2523 found: 332.2520

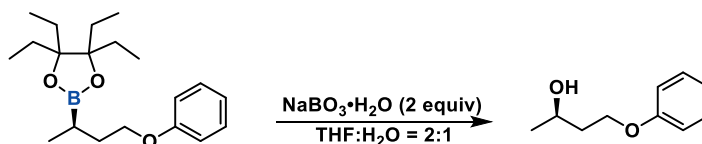

**32b**

(*R*)-4,4,5,5-tetraethyl-2-(4-phenoxybutan-2-yl)-1,3,2-dioxaborolane (38.8 mg, 0.12 mmol) was dissolved in THF (1.0 mL) and transferred to 20 mL vial, then NaBO<sub>3</sub>·H<sub>2</sub>O (23.9 mg, 0.24 mmol) and H<sub>2</sub>O (0.5 mL) were added and the mixture was stirred at room temperature for 4 hours. Upon complete consumption of the substrate, the mixture was extracted with Et<sub>2</sub>O (3 mL×3) and dried over Na<sub>2</sub>SO<sub>4</sub>. Column separation (silica gel, Petroleum: EtOAc = 4:1) afforded a colorless oil (15.7 mg, 80%, 93:7 *e.r.*). The *e.r.* was determined on HPLC system with AD column (5% EtOH/hexanes, flow rate 1.0 mL/min, 25 °C); retention time for compound (Fig. S61): *t*<sub>1</sub> = 10.294 min (minor), *t*<sub>2</sub> = 11.436 min (major).

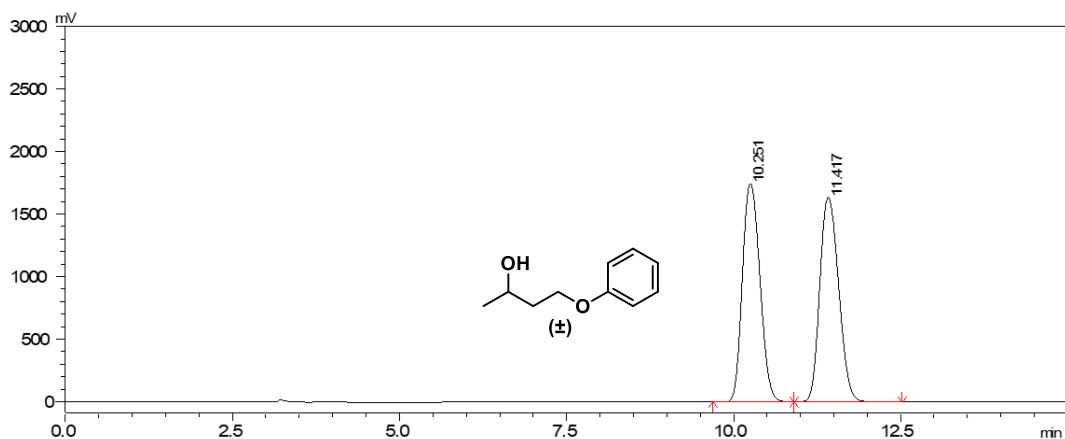

**Figure S60.** HPLC trace of 4-phenoxybutan-2-ol.

| #     | Ret Time (min) | Height (μV) | Area (μV.sec) | Area (%) |
|-------|----------------|-------------|---------------|----------|
| 1     | 10.251         | 1746984     | 31917745      | 49.782   |
| 2     | 11.417         | 1637483     | 32197411      | 50.218   |
| total |                | 3384466     | 64115156      | 100.000  |

**Table S21.** HPLC trace of 4-phenoxybutan-2-ol.

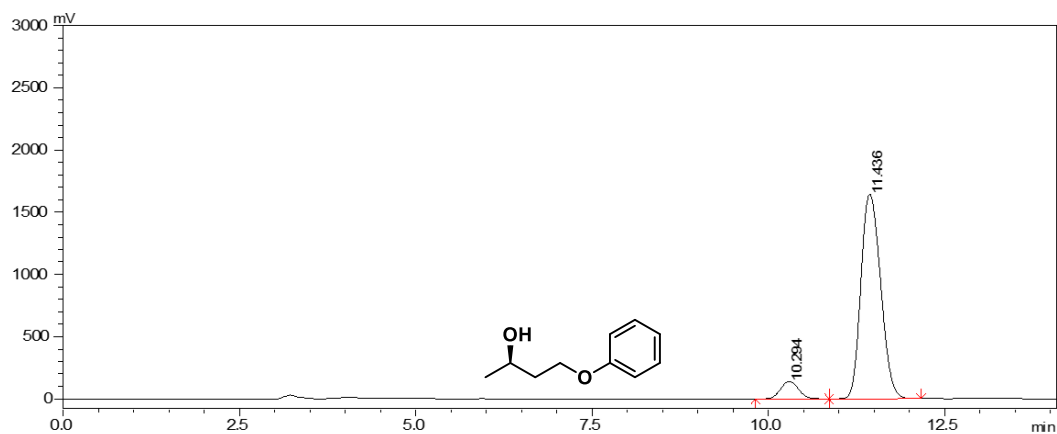

**Figure S61.** HPLC trace of (*R*)-4-phenoxybutan-2-ol

| #     | Ret Time (min) | Height (μV) | Area (μV.sec) | Area (%) |
|-------|----------------|-------------|---------------|----------|
| 1     | 10.294         | 139394      | 2465324       | 7.151    |
| 2     | 11.436         | 1643408     | 32010931      | 92.849   |
| total |                | 1782802     | 34476255      | 100.000  |

**Table S22.** HPLC trace of (*R*)-4-phenoxybutan-2-ol

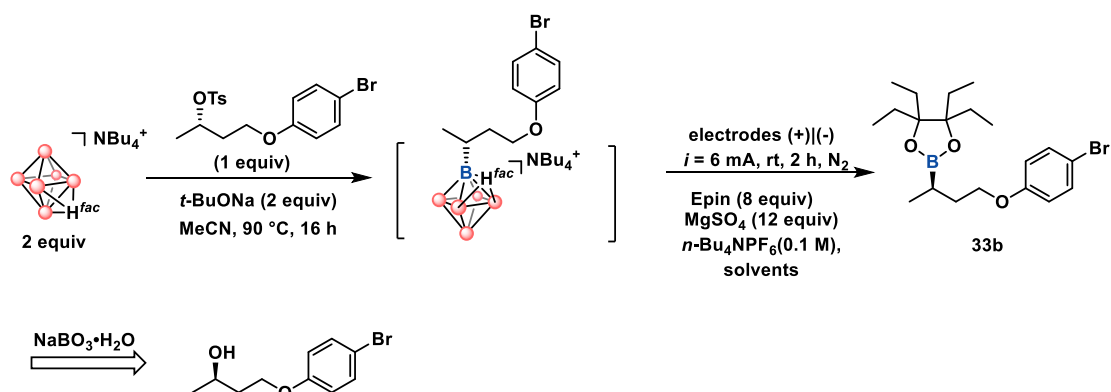

To a 10 mL oven dried Schlenk tube equipped with a magnetic stir bar, *n*-Bu<sub>4</sub>N(B<sub>6</sub>H<sub>7</sub>) (**1**) (121.0 mg, 0.4 mmol, 2 equiv), and *t*-BuONa (40.2 mg, 0.4 mmol, 2 equiv) were added sequentially. The tube was evacuated and backfilled with N<sub>2</sub> three times. Dry MeCN (1 mL) was added via syringe. Then the solution of (*S*)-4-(4-bromophenoxy)butan-2-yl 4-methylbenzenesulfonate (80.2 mg, 0.2 mmol, 1 equiv) in dry MeCN (1 mL) was added. The mixture was then magnetically stirred while being heated in oil bath 90 °C for 16 hours. Then the heating bath was removed and flask was cooled down to room temperature. The solvent was removed *in vacuo* and resulting oil was washed with hexane (3 mL×3), from <sup>11</sup>B NMR the conversion could be determined as 90%.

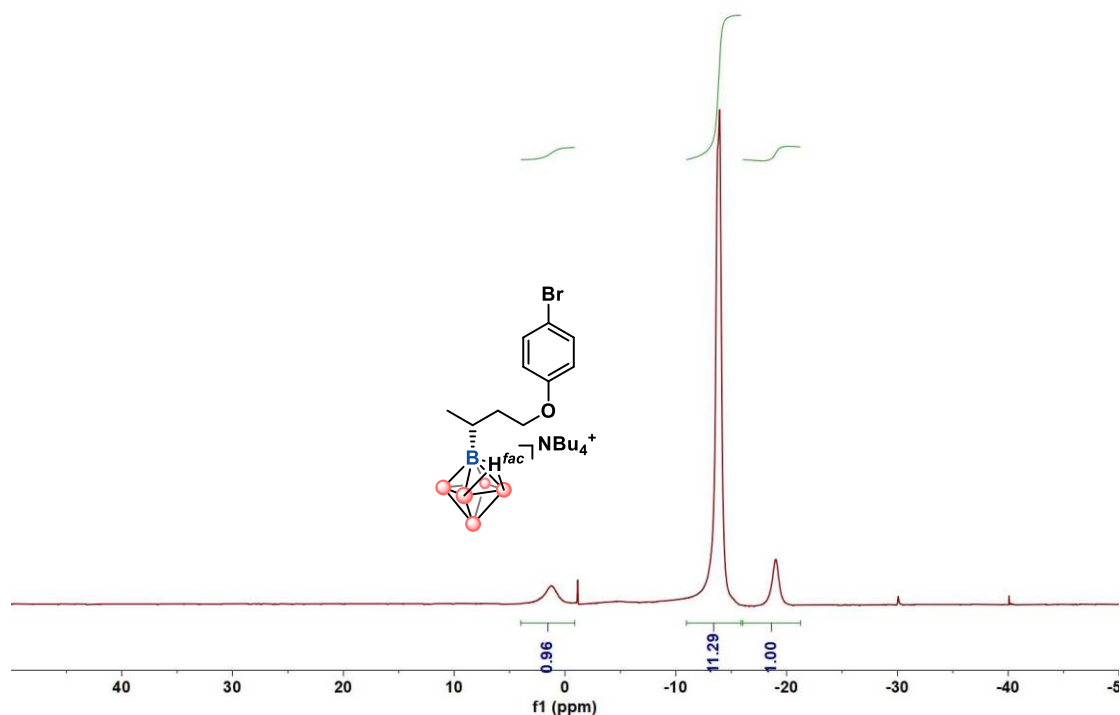

**Figure S62.** <sup>11</sup>B{<sup>1</sup>H} NMR spectrum after substitution step with ((*S*)-4-(4-bromophenoxy)butan-2-yl 4-methylbenzenesulfonate

**Electrolysis set up 1** is used. To a 5 mL electrochemical reaction cell equipped with a magnetic stir bar, 3,4-Diethyl-3,4-hexanediol (271.3 mg, 1.6 mmol, 8 equiv), MgSO<sub>4</sub> (295.8 mg, 2.4 mmol, 12 equiv), and TBAPF<sub>6</sub> (114.6 mg, 0.3 mmol, 0.1 M) were added. The cell was evacuated and backfilled with N<sub>2</sub> three times. Dry MeCN (1.5 mL) was added. Then the

solution of the crude product of the substituted cluster in dry TCE (1.5 mL) was added. The undivided cell was equipped with RVC (3.5 mm×0.5 mm×0.4 mm) as the anode and RVC (3.5 mm×0.5 mm×0.4 mm) as the cathode and then backfilled with N<sub>2</sub> to replace air atmosphere. The mixture was pre-stirred for five minutes, and then the reaction mixture was electrolyzed at a constant current of 6 mA until passing 2.20 F/mol of total charge (2 hours) at room temperature. The solvent was removed under reduced pressure and the residual solids were extracted with ethyl acetate (10 mL). The extract was concentrated and subjected to column separation (silica gel, Petroleum: Diethyl ether= 80:1) to afford the product (35.5 mg, [ $\alpha$ ]<sub>D</sub><sup>22.4</sup> = -1.4 (c = 0.2, CHCl<sub>3</sub>)) in 43% yield. R<sub>f</sub> = 0.42(Petroleum: EtOAc = 20:1).

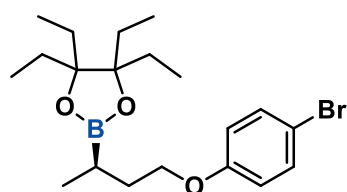

**33b**

<sup>1</sup>H NMR (400 MHz, CDCl<sub>3</sub>)  $\delta$  7.35 – 7.33 (m, 2H), 6.82 – 6.75 (m, 2H), 4.02 – 3.91 (m, 2H), 1.99 – 1.90 (m, 1H), 1.78 – 1.70 (m, 1H), 1.68 – 1.57 (m, 8H), 1.26 – 1.18 (m, 1H), 1.04 (d, *J* = 7.5 Hz, 3H), 0.92 – 0.88 (m, 12H).

<sup>13</sup>C{<sup>1</sup>H} NMR (101 MHz, CDCl<sub>3</sub>)  $\delta$  158.32, 132.10, 116.37, 112.38, 88.07, 67.68, 32.36, 26.30, 26.24, 15.81, 8.77, 8.74.

<sup>11</sup>B{<sup>1</sup>H} NMR (193 MHz, CDCl<sub>3</sub>)  $\delta$  33.74.

HR-MS (EI) for C<sub>20</sub>H<sub>32</sub><sup>11</sup>BO<sub>3</sub><sup>79</sup>Br [M] *m/z* [M]<sup>+</sup>: calculated: 410.1628 found: 410.1631

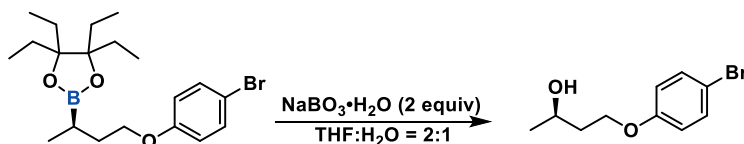

**33b**

(*R*)-2-(4-(4-bromophenoxy)butan-2-yl)-4,4,5,5-tetraethyl-1,3,2-dioxaborolane (32.3 mg, 0.07 mmol) was dissolved in THF (1.0 mL) and transferred to 20 mL vial, then NaBO<sub>3</sub>·H<sub>2</sub>O (19.4 mg, 0.16 mmol) and H<sub>2</sub>O (0.5 mL) were added and the mixture was stirred at room temperature for 4 hours. Upon complete consumption of the substrate, the mixture was extracted with Et<sub>2</sub>O (3 mL×3) and dried over Na<sub>2</sub>SO<sub>4</sub>. Column separation (silica gel, Petroleum: EtOAc = 4:1) afforded a colorless oil (10.4 mg, 54%, 93:7 *e.r.*). The *e.r.* was determined on HPLC system with AS column (10% EtOH/hexanes, flow rate 1.0 mL/min, 25 °C); retention time for compound (Fig. S64): *t*<sub>1</sub> = 7.119 min (minor), *t*<sub>2</sub> = 12.463 min (major).

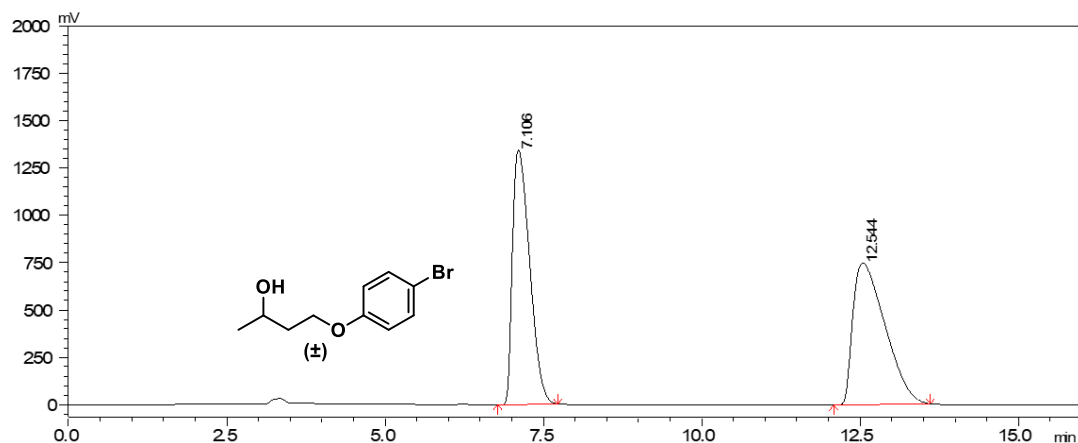

**Figure S63.** HPLC trace of 4-(4-bromophenoxy)butan-2-ol.

| #     | Ret Time (min) | Height ( $\mu\text{V}$ ) | Area ( $\mu\text{V}\cdot\text{sec}$ ) | Area (%) |
|-------|----------------|--------------------------|---------------------------------------|----------|
| 1     | 7.106          | 1346073                  | 25409184                              | 49.017   |
| 2     | 12.544         | 748609                   | 26427912                              | 50.983   |
| total |                | 2094682                  | 51837096                              | 100.000  |

**Table S23.** HPLC trace of standard 4-(4-bromophenoxy)butan-2-ol.

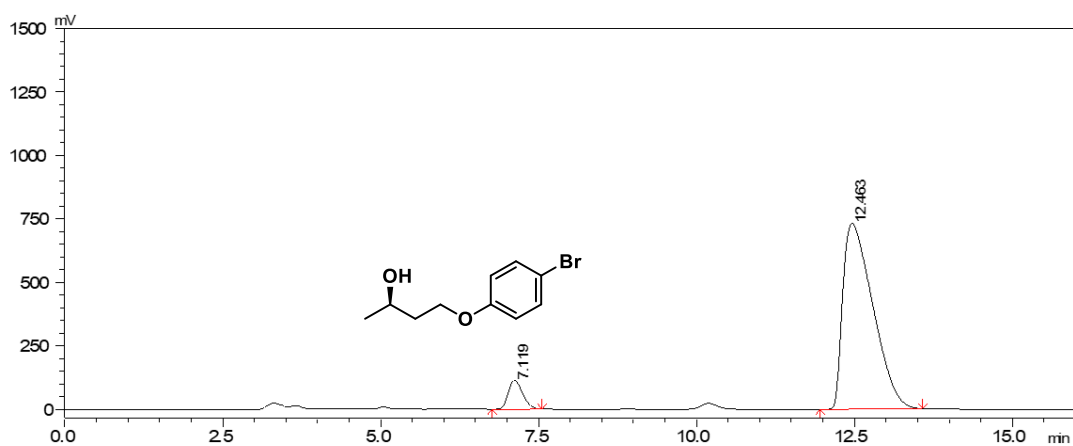

**Figure S64.** HPLC trace of (*R*)-4-(4-bromophenoxy)butan-2-ol

| #     | Ret Time (min) | Height ( $\mu\text{V}$ ) | Area ( $\mu\text{V}\cdot\text{sec}$ ) | Area (%) |
|-------|----------------|--------------------------|---------------------------------------|----------|
| 1     | 7.119          | 112741                   | 1792121                               | 6.878    |
| 2     | 12.463         | 731923                   | 24262311                              | 93.122   |
| total |                | 844664                   | 26054431                              | 100.000  |

**Table S24.** HPLC trace of (*R*)-4-(4-bromophenoxy)butan-2-ol

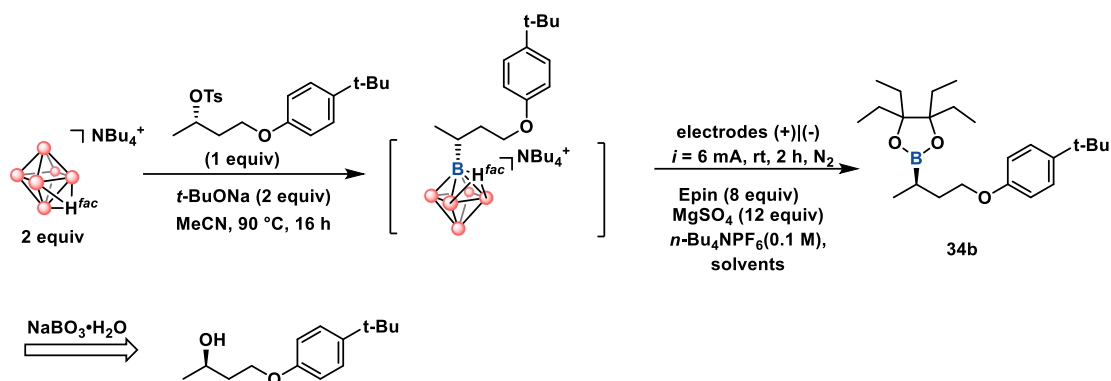

To a 10 mL oven dried Schlenk tube equipped with a magnetic stir bar, *n*-Bu<sub>4</sub>N(B<sub>6</sub>H<sub>7</sub>) (**1**) (125.5 mg, 0.4 mmol, 2 equiv), and *t*-BuONa (38.5 mg, 0.4 mmol, 2 equiv) were added sequentially. The tube was evacuated and backfilled with N<sub>2</sub> three times. Dry MeCN (1 mL) was added via syringe. Then the solution of (*S*)-4-(4-(*tert*-butyl)phenoxy)butan-2-yl 4-methylbenzenesulfonate (75.7 mg, 0.2 mmol, 1 equiv) in dry MeCN (1 mL) was added. The mixture was then magnetically stirred while being heated in oil bath 90 °C for 16 hours. Then the heating bath was removed and flask was cooled down to room temperature. The solvent was removed *in vacuo* and resulting oil was washed with hexane (3 mL×3), from <sup>11</sup>B NMR the conversion could be determined as 83%.

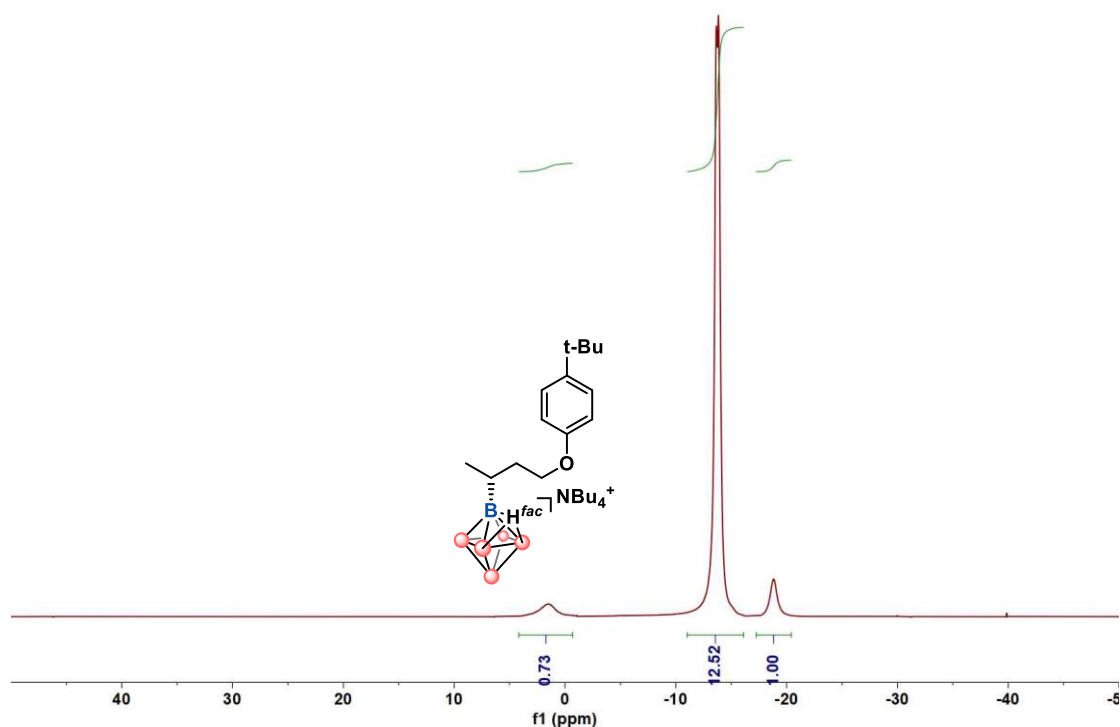

**Figure S65.** <sup>11</sup>B{<sup>1</sup>H} NMR spectrum after substitution step with (*S*)-4-(4-(*tert*-butyl)phenoxy)butan-2-yl 4-methylbenzenesulfonate

**Electrolysis set up 1** is used. To a 5 mL electrochemical reaction cell equipped with a magnetic stir bar, 3,4-Diethyl-3,4-hexanediol (281.9 mg, 1.6 mmol, 8 equiv), MgSO<sub>4</sub> (289.2 mg, 2.4 mmol, 12 equiv), and TBAPF<sub>6</sub> (117.3 mg, 0.3 mmol, 0.1 M) were added. The cell was evacuated and backfilled with N<sub>2</sub> three times. Dry MeCN (1.5 mL) was added. Then the solution of the

crude product of the substituted cluster in dry TCE (1.5 mL) was added. The undivided cell was equipped with RVC (3.5 mm×0.5 mm×0.4 mm) as the anode and RVC (3.5 mm×0.5 mm×0.4 mm) as the cathode and then backfilled with N<sub>2</sub> to replace air atmosphere. The mixture was pre-stirred for five minutes, and then the reaction mixture was electrolyzed at a constant current of 6 mA until passing 2.20 F/mol of total charge (2 hours) at room temperature. The solvent was removed under reduced pressure and the residual solids were extracted with ethyl acetate (10 mL). The extract was concentrated and subjected to column separation (silica gel, Petroleum: Diethyl ether= 80:1) to afford the product (35.9 mg,  $[\alpha]_D^{22.3} = -2.3$  (c = 0.4, CHCl<sub>3</sub>)) in 46% yield. R<sub>f</sub> = 0.65 (Petroleum: EtOAc = 20:1).

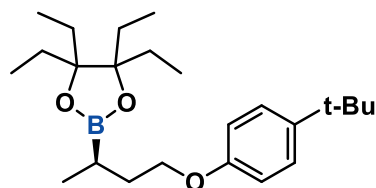

**34b**

<sup>1</sup>H NMR (400 MHz, CDCl<sub>3</sub>) δ 7.30 – 7.27 (m, 2H), 6.86 – 6.82 (m, 2H), 4.02 – 3.93 (m, 2H), 1.99 – 1.94 (m, 1H), 1.76 – 1.59 (m, 9H), 1.29 (s, 9H), 1.04 (d, *J* = 7.5 Hz, 3H), 0.90 (td, *J* = 7.5, 2.6 Hz, 12H).

<sup>13</sup>C{<sup>1</sup>H} NMR (101 MHz, CDCl<sub>3</sub>) δ 156.92, 142.89, 126.08, 113.95, 88.00, 67.29, 34.00, 32.56, 31.53, 26.27, 26.22, 15.76, 8.79, 8.76.

<sup>11</sup>B{<sup>1</sup>H} NMR (193 MHz, CDCl<sub>3</sub>) δ 33.67.

HR-MS (EI) for C<sub>24</sub>H<sub>41</sub><sup>11</sup>BO<sub>3</sub> [M] *m/z* [M]<sup>+</sup>: calculated: 388.3149 found: 388.3147

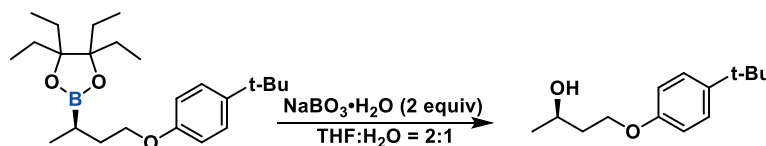

**34b**

(*R*)-2-(4-(4-(tert-butyl)phenoxy)butan-2-yl)-4,4,5,5-tetraethyl-1,3,2-dioxaborolane (29.3 mg, 0.08 mmol) was dissolved in THF (1.0 mL) and transferred to 20 mL vial, then NaBO<sub>3</sub>·H<sub>2</sub>O (17.3 mg, 0.16 mmol) and H<sub>2</sub>O (0.5 mL) were added and the mixture was stirred at room temperature for 4 hours. Upon complete consumption of the substrate, the mixture was extracted with Et<sub>2</sub>O (3 mL×3) and dried over Na<sub>2</sub>SO<sub>4</sub>. Column separation (silica gel, Petroleum: EtOAc = 4:1) afforded a colorless oil (9.0 mg, 54%, 94:6 *e.r.*). The *e.r.* was determined on HPLC system with OJ column (5% *i*-PrOH/hexanes, flow rate 1.0 mL/min, 25 °C); retention time for compound (Fig. S67): *t*<sub>1</sub> = 12.377 min (major), *t*<sub>2</sub> = 13.382 min (minor).



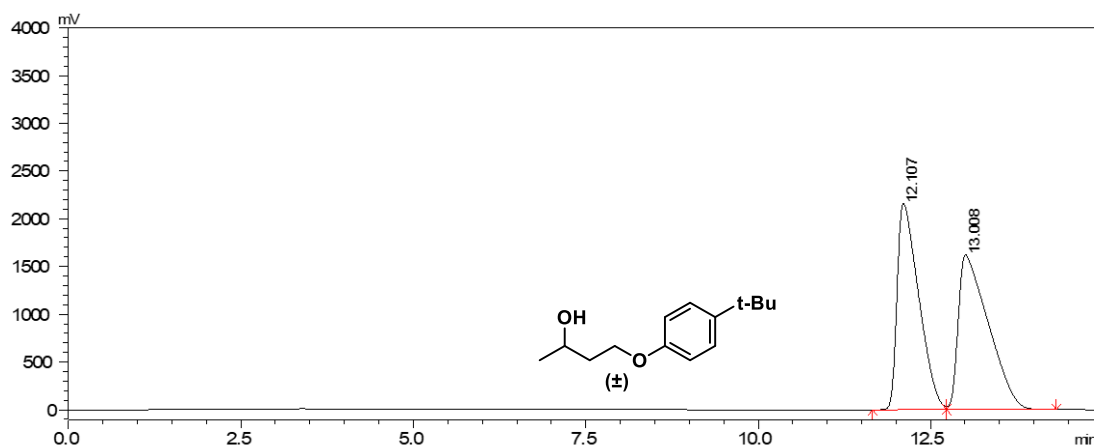

**Figure S66.** HPLC trace of 4-(4-(tert-butyl)phenoxy)butan-2-ol.

| #     | Ret Time (min) | Height ( $\mu\text{V}$ ) | Area ( $\mu\text{V}\cdot\text{sec}$ ) | Area (%) |
|-------|----------------|--------------------------|---------------------------------------|----------|
| 1     | 12.107         | 2161789                  | 47049753                              | 48.901   |
| 2     | 13.008         | 1622788                  | 49164206                              | 51.099   |
| total |                | 3784577                  | 96213959                              | 100.000  |

**Table S25.** HPLC trace of 4-(4-(tert-butyl)phenoxy)butan-2-ol.

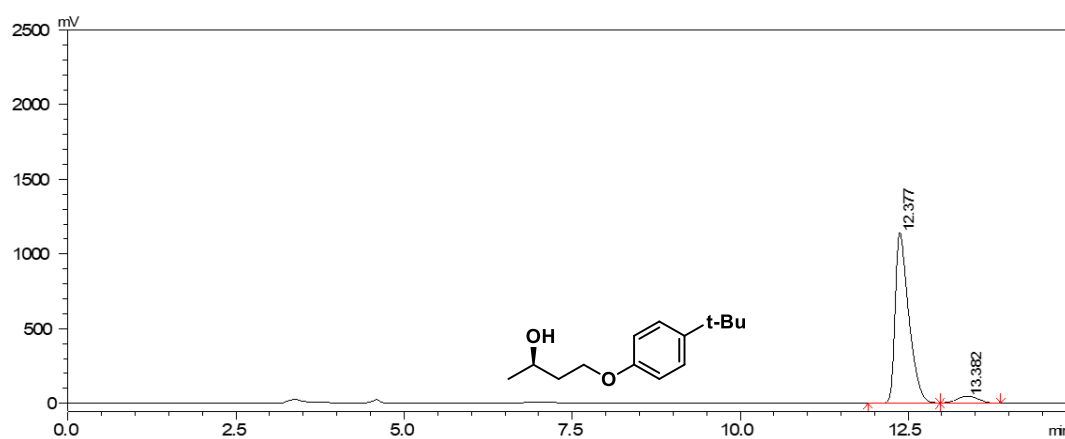

**Figure S67.** HPLC trace of (*R*)-4-(4-(tert-butyl)phenoxy)butan-2-ol.

| #     | Ret Time (min) | Height ( $\mu\text{V}$ ) | Area ( $\mu\text{V}\cdot\text{sec}$ ) | Area (%) |
|-------|----------------|--------------------------|---------------------------------------|----------|
| 1     | 12.377         | 1146004                  | 16131538                              | 93.638   |
| 2     | 13.382         | 47711                    | 1096041                               | 6.362    |
| total |                | 1193715                  | 17227579                              | 100.000  |

**Table S26.** HPLC trace of (*R*)-4-(4-(tert-butyl)phenoxy)butan-2-ol.

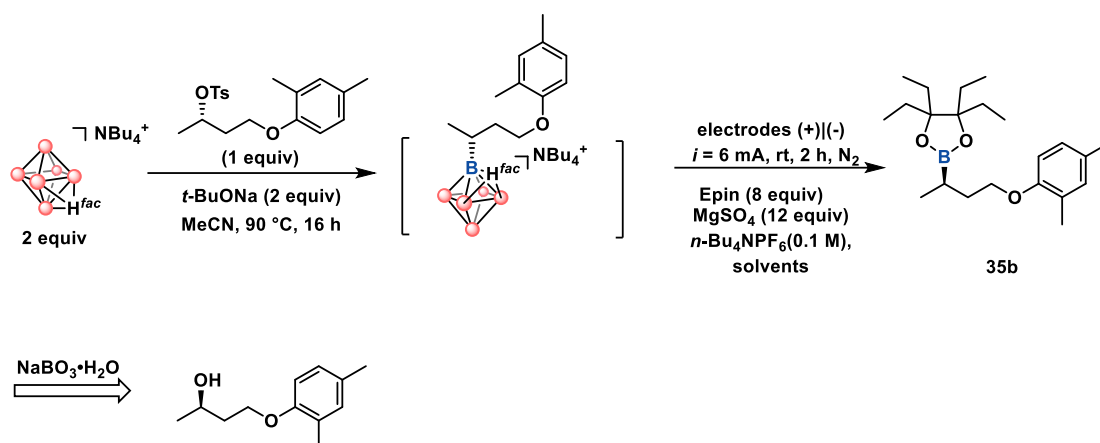

To a 10 mL oven dried Schlenk tube equipped with a magnetic stir bar, *n*-Bu<sub>4</sub>N(B<sub>6</sub>H<sub>7</sub>) (**1**) (125.1 mg, 0.4 mmol, 2 equiv), and *t*-BuONa (39.6 mg, 0.4 mmol, 2 equiv) were added sequentially. The tube was evacuated and backfilled with N<sub>2</sub> three times. Dry MeCN (1 mL) was added via syringe. Then the solution of benzyl (*S*)-4-(2,4-dimethylphenoxy)butan-2-yl 4-methylbenzenesulfonate (69.9 mg, 0.2 mmol, 1 equiv) in dry MeCN (1 mL) was added. The mixture was then magnetically stirred while being heated in oil bath 90 °C for 16 hours. Then the heating bath was removed and flask was cooled down to room temperature. The solvent was removed *in vacuo* and resulting oil was washed with hexane (3 mL×3), from <sup>11</sup>B NMR the conversion could be determined as 90%.

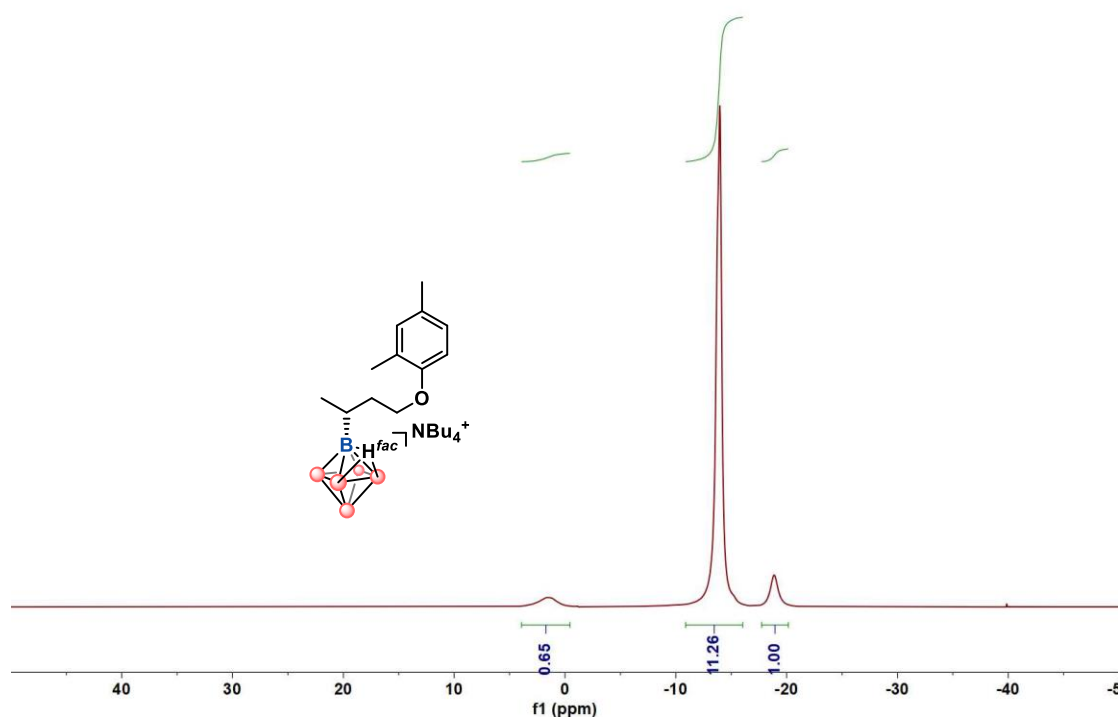

**Figure S68.** <sup>11</sup>B{<sup>1</sup>H} NMR spectrum after substitution step with benzyl (*S*)-4-(2,4-dimethylphenoxy)butan-2-yl 4-methylbenzenesulfonate.

**Electrolysis set up 1** is used. To a 5 mL electrochemical reaction cell equipped with a magnetic stir bar, 3,4-Diethyl-3,4-hexanediol (278.9 mg, 1.6 mmol, 8 equiv), MgSO<sub>4</sub> (289.5 mg, 2.4 mmol, 12 equiv), and TBAPF<sub>6</sub> (117.6 mg, 0.3 mmol, 0.1 M) were added. The cell

was evacuated and backfilled with N<sub>2</sub> three times. Dry MeCN (1.5 mL) was added. Then the solution of the crude product of the substituted cluster in dry TCE (1.5 mL) was added. The undivided cell was equipped with RVC (3.5 mm×0.5 mm×0.4 mm) as the anode and RVC (3.5 mm×0.5 mm×0.4 mm) as the cathode and then backfilled with N<sub>2</sub> to replace air atmosphere. The mixture was pre-stirred for five minutes, and then the reaction mixture was electrolyzed at a constant current of 6 mA until passing 2.20 F/mol of total charge (2 hours) at room temperature. The solvent was removed under reduced pressure and the residual solids were extracted with ethyl acetate (10 mL). The extract was concentrated and subjected to column separation (silica gel, Petroleum: Diethyl ether= 100:1) to afford the product (46.0 mg,  $[\alpha]_D^{21.7} = -3.2$  (c = 0.4, CHCl<sub>3</sub>)) in 63% yield. R<sub>f</sub> = 0.75 (Petroleum: EtOAc = 20:1).

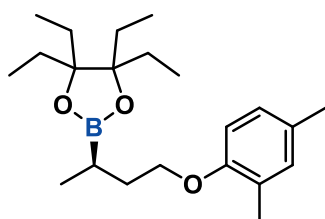

**35b**

<sup>1</sup>H NMR (400 MHz, CDCl<sub>3</sub>) δ 6.94 – 6.90 (m, 2H), 6.73 (d, *J* = 8.1 Hz, 1H), 4.01 – 3.94 (m, 2H), 2.25 (s, 3H), 2.19 (s, 3H), 2.00 – 1.95 (m, 1H), 1.78 – 1.74 (m, 1H), 1.70 – 1.59 (m, 8H), 1.28 – 1.24 (m, 1H), 1.05 (d, *J* = 7.5 Hz, 3H), 0.92 – 0.88 (m, 12H).

<sup>13</sup>C{<sup>1</sup>H} NMR (101 MHz, CDCl<sub>3</sub>) δ 155.19, 131.32, 129.05, 126.76, 126.69, 111.23, 87.98, 67.58, 32.59, 26.29, 26.23, 20.42, 16.18, 15.78, 8.79, 8.74.

<sup>11</sup>B{<sup>1</sup>H} NMR (193 MHz, CDCl<sub>3</sub>) δ 33.81.

HR-MS (EI) for C<sub>22</sub>H<sub>37</sub><sup>11</sup>BO<sub>3</sub> [M] *m/z* [M]<sup>+</sup>: calculated: 360.2836 found: 360.2834

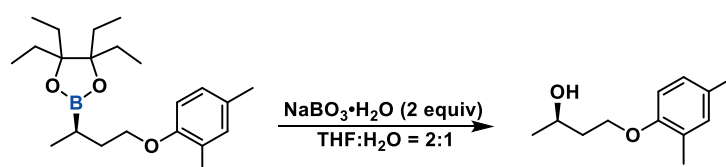

**35b**

(*R*)-2-(4-(2,4-dimethylphenoxy)butan-2-yl)-4,4,5,5-tetraethyl-1,3,2-dioxaborolane (21.8 mg, 0.06 mmol) was dissolved in THF (1.0 mL) and transferred to 20 mL vial, then NaBO<sub>3</sub>·H<sub>2</sub>O (13.2 mg, 0.12 mmol) and H<sub>2</sub>O (0.5 mL) were added and the mixture was stirred at room temperature for 4 hours. Upon complete consumption of the substrate, the mixture was extracted with Et<sub>2</sub>O (3 mL×3) and dried over Na<sub>2</sub>SO<sub>4</sub>. Column separation (silica gel, Petroleum: EtOAc = 4:1) afford a colorless oil (9.2 mg, 78%, 94:6 *e.r.*). The *e.r.* was determined on HPLC system with AD column (5% *i*-PrOH/hexanes, flow rate 1.0 mL/min, 25 °C); retention time for compound (Fig. S70): *t*<sub>1</sub> = 8.360 min (minor), *t*<sub>2</sub> = 8.938 min (major).

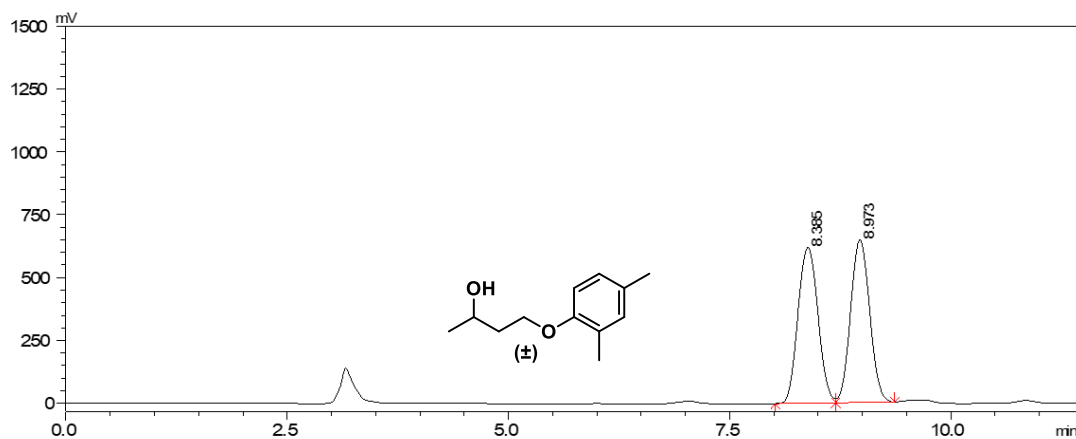

**Figure S69.** HPLC trace of 4-(2,4-dimethylphenoxy)butan-2-ol.

| #     | Ret Time (min) | Height ( $\mu\text{V}$ ) | Area ( $\mu\text{V}\cdot\text{sec}$ ) | Area (%) |
|-------|----------------|--------------------------|---------------------------------------|----------|
| 1     | 8.385          | 620118                   | 9754192                               | 50.112   |
| 2     | 8.973          | 648124                   | 9710696                               | 49.888   |
| total |                | 1268242                  | 19464888                              | 100.000  |

**Table S27.** HPLC trace of 4-(2,4-dimethylphenoxy)butan-2-ol.

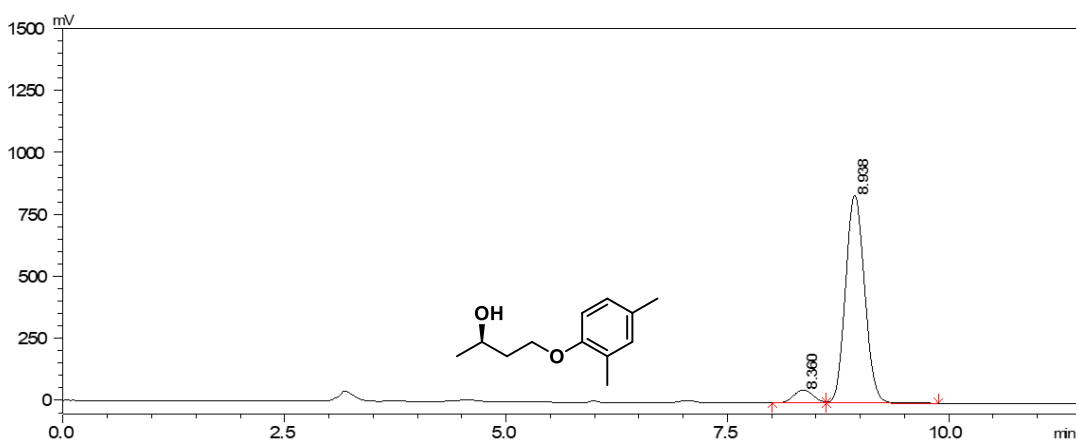

**Figure S70.** HPLC trace of (*R*)-4-(2,4-dimethylphenoxy)butan-2-ol.

| #     | Ret Time (min) | Height ( $\mu\text{V}$ ) | Area ( $\mu\text{V}\cdot\text{sec}$ ) | Area (%) |
|-------|----------------|--------------------------|---------------------------------------|----------|
| 1     | 8.360          | 51405                    | 800493                                | 5.979    |
| 2     | 8.938          | 837283                   | 12587903                              | 94.021   |
| total |                | 888688                   | 13388396                              | 100.000  |

**Table S28.** HPLC trace of (*R*)-4-(2,4-dimethylphenoxy)butan-2-ol.

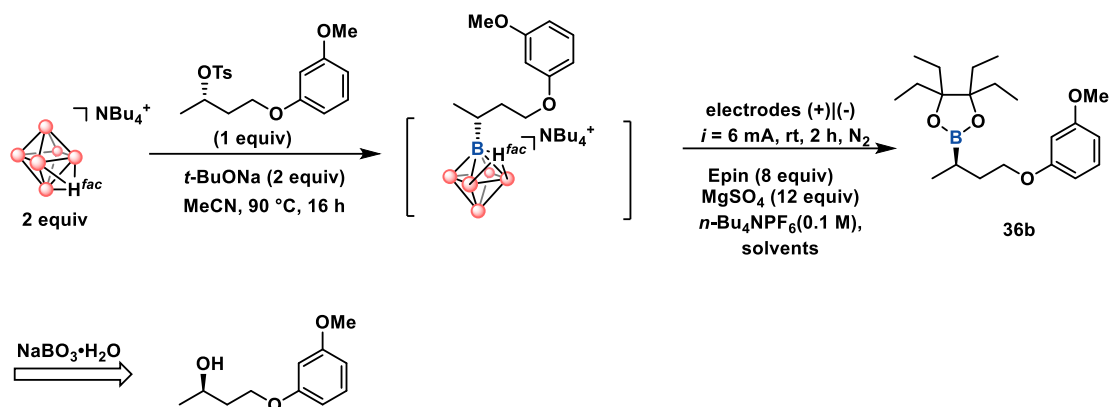

To a 10 mL oven dried Schlenk tube equipped with a magnetic stir bar,  $n\text{-Bu}_4\text{N}(\text{B}_6\text{H}_7)$  (**1**) (120.1 mg, 0.4 mmol, 2 equiv), and  $t\text{-BuONa}$  (39.1 mg, 0.4 mmol, 2 equiv) were added sequentially. The tube was evacuated and backfilled with  $\text{N}_2$  three times. Dry MeCN (1 mL) was added via syringe. Then the solution of  $(S)$ -4-(3-methoxyphenoxy)butan-2-yl 4-methylbenzenesulfonate (69.8 mg, 0.2 mmol, 1 equiv) in dry MeCN (1 mL) was added. The mixture was then magnetically stirred while being heated in oil bath  $90\text{ }^\circ\text{C}$  for 16 hours. Then the heating bath was removed and flask was cooled down to room temperature. The solvent was removed *in vacuo* and resulting oil was washed with hexane (3 mL $\times$ 3), from  $^{11}\text{B}$  NMR the conversion could be determined as 98%.

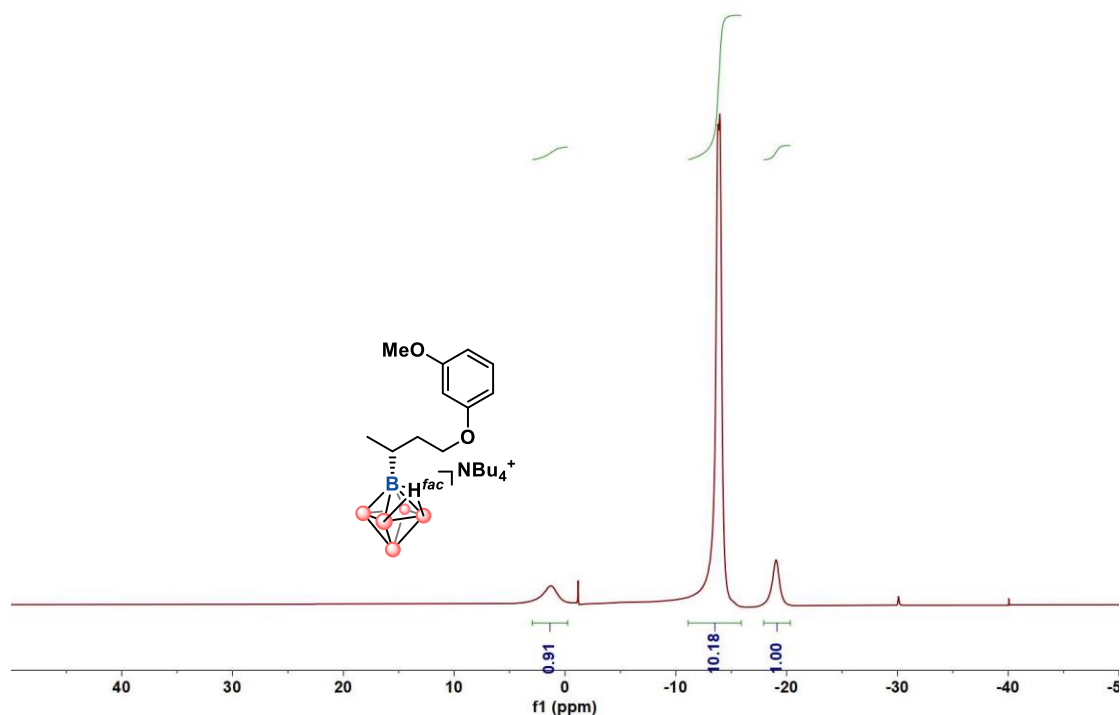

**Figure S71.**  $^{11}\text{B}\{^1\text{H}\}$  NMR spectrum after substitution step with  $(S)$ -4-(3-methoxyphenoxy)butan-2-yl 4-methylbenzenesulfonate

**Electrolysis set up 1** is used. To a 5 mL electrochemical reaction cell equipped with a magnetic stir bar, 3,4-Diethyl-3,4-hexanediol (276.6 mg, 1.6 mmol, 8 equiv),  $\text{MgSO}_4$  (289.6 mg, 2.4 mmol, 12 equiv), and  $\text{TBAPF}_6$  (121.8 mg, 0.3 mmol, 0.1 M) were added. The cell was evacuated and backfilled with  $\text{N}_2$  three times. Dry MeCN (1.5 mL) was added. Then the

solution of the crude product of the substituted cluster in dry TCE (1.5 mL) was added. The undivided cell was equipped with RVC (3.5 mm×0.5 mm×0.4 mm) as the anode and RVC (3.5 mm×0.5 mm×0.4 mm) as the cathode and then backfilled with N<sub>2</sub> to replace air atmosphere. The mixture was pre-stirred for five minutes, and then the reaction mixture was electrolyzed at a constant current of 6 mA until passing 2.20 F/mol of total charge (2 hours) at room temperature. The solvent was removed under reduced pressure and the residual solids were extracted with ethyl acetate (10 mL). The extract was concentrated and subjected to column separation (silica gel, Petroleum: Diethyl ether= 80:1) to afford the product (48.5 mg,  $[\alpha]_D^{22.0} = -2.3$  (c = 0.4, CHCl<sub>3</sub>)) in 67% yield.  $R_f = 0.54$  (Petroleum: EtOAc = 20:1).

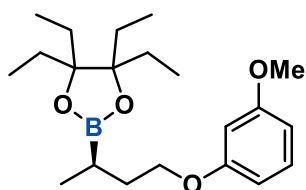

**36b**

**<sup>1</sup>H NMR (400 MHz, CDCl<sub>3</sub>)**  $\delta$  7.18 – 7.14 (m, 1H), 6.52 – 6.46 (m, 3H), 4.01 – 3.96 (m, 2H), 3.78 (s, 3H), 1.97 – 1.95 (m, 1H), 1.77 – 1.71 (m, 1H), 1.71 – 1.59 (m, 8H), 1.26 – 1.22 (m, 1H), 1.04 (d,  $J = 7.5$  Hz, 3H), 0.94 – 0.88 (m, 12H).

**<sup>13</sup>C{<sup>1</sup>H} NMR (101 MHz, CDCl<sub>3</sub>)**  $\delta$  160.74, 160.48, 129.72, 106.69, 106.02, 100.93, 88.02, 67.37, 55.21, 32.47, 26.28, 26.22, 15.77, 8.78, 8.75.

**<sup>11</sup>B{<sup>1</sup>H} NMR (193 MHz, CDCl<sub>3</sub>)**  $\delta$  33.74.

**HR-MS (EI)** for C<sub>21</sub>H<sub>35</sub><sup>11</sup>B<sub>4</sub> [M]  $m/z$  [M]<sup>+</sup>: calculated: 362.2628 found: 362.2630

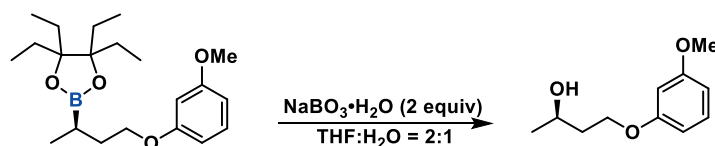

**36b**

(*R*)-4,4,5,5-tetraethyl-2-(4-(3-methoxyphenoxy)butan-2-yl)-1,3,2-dioxaborolane (48.5 mg, 0.14 mmol) was dissolved in THF (1.0 mL) and transferred to 20 mL vial, then NaBO<sub>3</sub>·H<sub>2</sub>O (28.2 mg, 0.28 mmol) and H<sub>2</sub>O (0.5 mL) were added and the mixture was stirred at room temperature for 4 hours. Upon complete consumption of the substrate, the mixture was extracted with Et<sub>2</sub>O (3 mL×3) and dried over Na<sub>2</sub>SO<sub>4</sub>. Column separation (silica gel, Petroleum: EtOAc = 4:1) afforded a colorless oil (17.2 mg, 67%, 93:7 *e.r.*). The *e.r.* was determined on HPLC system with AD column (5% *i*-PrOH/hexanes, flow rate 1.0 mL/min, 25 °C); retention time for compound (Fig. S73):  $t_1 = 12.964$  min (minor),  $t_2 = 15.152$  min (major).

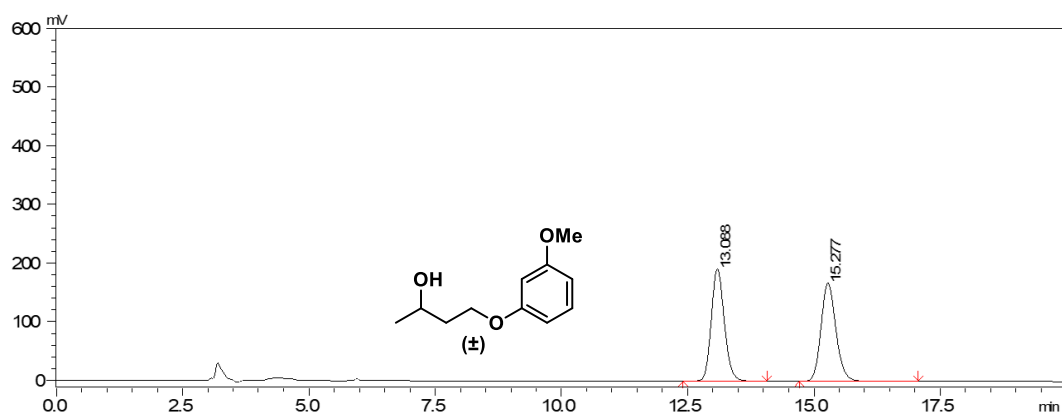

**Figure S72.** HPLC trace of 4-(3-methoxyphenoxy)butan-2-ol.

| #     | Ret Time (min) | Height ( $\mu\text{V}$ ) | Area ( $\mu\text{V}\cdot\text{sec}$ ) | Area (%) |
|-------|----------------|--------------------------|---------------------------------------|----------|
| 1     | 13.088         | 191291                   | 3450438                               | 49.944   |
| 2     | 15.277         | 167519                   | 3458219                               | 50.056   |
| total |                | 358811                   | 6908657                               | 100.000  |

**Table S29.** HPLC trace of 4-(3-methoxyphenoxy)butan-2-ol.

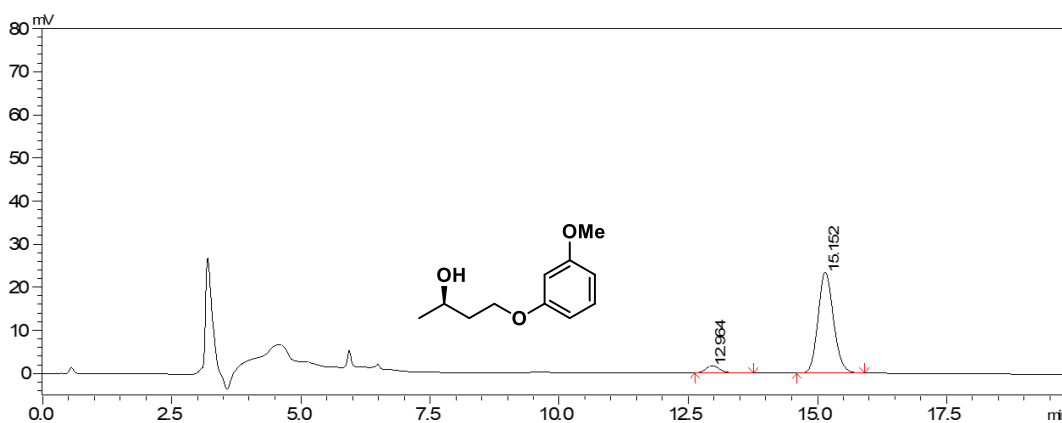

**Figure S73.** HPLC trace of (*R*)-4-(3-methoxyphenoxy)butan-2-ol.

| #     | Ret Time (min) | Height ( $\mu\text{V}$ ) | Area ( $\mu\text{V}\cdot\text{sec}$ ) | Area (%) |
|-------|----------------|--------------------------|---------------------------------------|----------|
| 1     | 12.964         | 1691                     | 32335                                 | 6.202    |
| 2     | 15.152         | 23455                    | 489055                                | 93.798   |
| total |                | 25146                    | 521390                                | 100.000  |

**Table S30.** HPLC trace of (*R*)-4-(3-methoxyphenoxy)butan-2-ol.

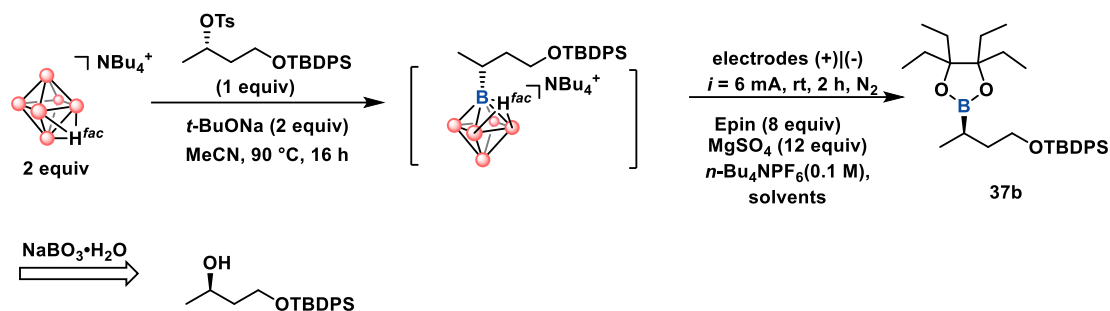

To a 10 mL oven dried Schlenk tube equipped with a magnetic stir bar,  $n\text{-Bu}_4\text{N}(\text{B}_6\text{H}_7)$  (**1**) (125.3 mg, 0.4 mmol, 2 equiv), and  $t\text{-BuONa}$  (39.4 mg, 0.4 mmol, 2 equiv) were added sequentially. The tube was evacuated and backfilled with  $\text{N}_2$  three times. Dry MeCN (1 mL) was added via syringe. Then the solution of (*S*)-4-((tert-butyl-diphenylsilyloxy)butan-2-yl 4-methylbenzenesulfonate (95.2 mg, 0.2 mmol, 1 equiv) in dry MeCN (1 mL) was added. The mixture was then magnetically stirred while being heated in oil bath  $90\text{ }^\circ\text{C}$  for 16 hours. Then the heating bath was removed and flask was cooled down to room temperature. The solvent was removed *in vacuo* and resulting oil was washed with hexane (3 mL $\times$ 3), from  $^{11}\text{B}$  NMR the conversion could be determined as 72%.

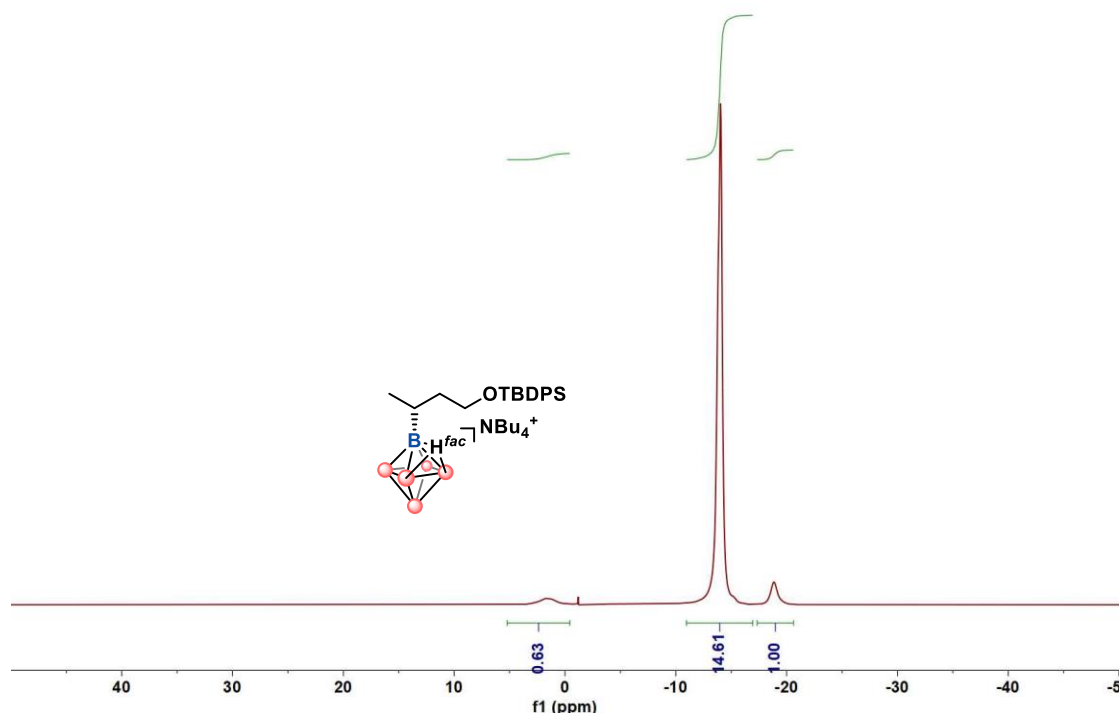

**Figure S74.**  $^{11}\text{B}\{^1\text{H}\}$  NMR spectrum after substitution step with (*S*)-4-((tert-butyl-diphenylsilyloxy)butan-2-yl 4-methylbenzenesulfonate

**Electrolysis set up 1** is used. To a 5 mL electrochemical reaction cell equipped with a magnetic stir bar, 3,4-Diethyl-3,4-hexanediol (278.4 mg, 1.6 mmol, 8 equiv),  $\text{MgSO}_4$  (294.5 mg, 2.4 mmol, 12 equiv), and  $\text{TBAPF}_6$  (127.1 mg, 0.3 mmol, 0.1 M) were added. The cell was evacuated and backfilled with  $\text{N}_2$  three times. Dry MeCN (1.5 mL) was added. Then the solution of the crude product of the substituted cluster in dry TCE (1.5 mL) was added. The undivided cell was equipped with RVC (3.5 mm $\times$ 0.5 mm $\times$ 0.4 mm) as the anode and RVC (3.5 mm $\times$ 0.5



mm×0.4 mm) as the cathode and then backfilled with N<sub>2</sub> to replace air atmosphere. The mixture was pre-stirred for five minutes, and then the reaction mixture was electrolyzed at a constant current of 6 mA until passing 2.20 F/mol of total charge (2 hours) at room temperature. The solvent was removed under reduced pressure and the residual solids were extracted with ethyl acetate (10 mL). The extract was concentrated and subjected to column separation (silica gel, Petroleum: Diethyl ether= 80:1) to afford the product (47.7 mg,  $[\alpha]_D^{22.2} = -2.4$  (c = 0.4, CHCl<sub>3</sub>)) in 45% yield. R<sub>f</sub> = 0.14(Petroleum: EtOAc = 40:1).

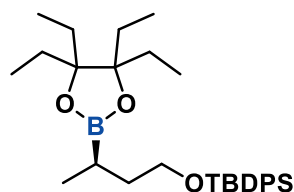

**37b**

<sup>1</sup>H NMR (400 MHz, CDCl<sub>3</sub>) δ 7.69 – 7.66 (m, 4H), 7.43 – 7.34 (m, 6H), 3.72 – 3.67 (m, 2H), 1.82 – 1.78 (m, 1H), 1.63 – 1.52 (m, 9H), 1.20 – 1.14 (m, 1H), 1.04 (s, 9H), 0.95 (d, *J* = 7.5 Hz, 3H), 0.86 (t, *J* = 7.5 Hz, 12H).

<sup>13</sup>C{<sup>1</sup>H} NMR (101 MHz, CDCl<sub>3</sub>) δ 135.55, 134.30, 129.37, 127.50, 87.78, 63.38, 35.97, 29.70, 26.87, 26.26, 26.20, 19.21, 15.73, 8.77, 8.71.

<sup>11</sup>B{<sup>1</sup>H} NMR (193 MHz, CDCl<sub>3</sub>) δ 33.83.

HR-MS (EI) for C<sub>28</sub>H<sub>42</sub><sup>11</sup>BO<sub>3</sub>Si [M] *m/z* [M-CH<sub>2</sub>CH<sub>3</sub>]<sup>+</sup>: calculated: 465.2996, found: 465.2992

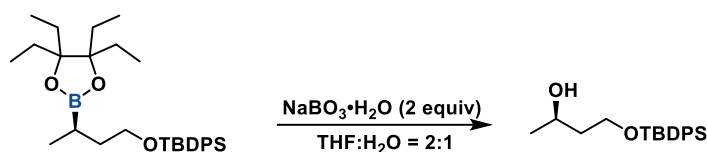

**37b**

(*R*)-tert-butylidiphenyl(3-(4,4,5,5-tetraethyl-1,3,2-dioxaborolan-2-yl)butoxy)silane (47.7 mg, 0.1 mmol) was dissolved in THF (1.0 mL) and transferred to 20 mL vial, then NaBO<sub>3</sub>·H<sub>2</sub>O (21.1 mg, 0.2 mmol) and H<sub>2</sub>O (0.5 mL) were added and the mixture was stirred at room temperature for 4 hours. Upon complete consumption of the substrate, the mixture was extracted with Et<sub>2</sub>O (3 mL×3) and dried over Na<sub>2</sub>SO<sub>4</sub>. Column separation (silica gel, Petroleum: EtOAc = 8:1) afforded a colorless oil (13.5 mg, 43%, 92:8 *e.r.*). The *e.r.* was determined on HPLC system with IB column (1% *i*-PrOH/hexanes, flow rate 1.0 mL/min, 25 °C); retention time for compound (Fig. S76): *t*<sub>1</sub> = 7.267 min (minor), *t*<sub>2</sub> = 9.600 min (major).

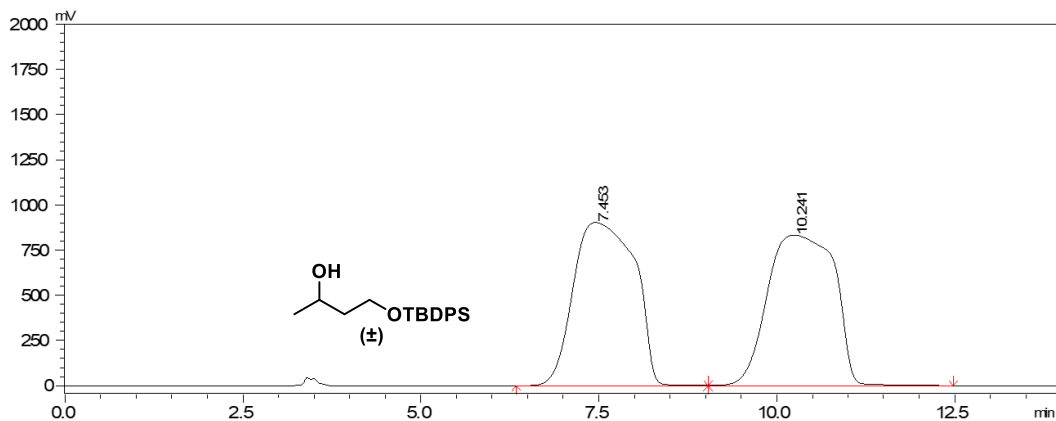

**Figure S75.** HPLC trace of 4-((tert-butyldiphenylsilyl)oxy)butan-2-ol.

| #     | Ret Time (min) | Height ( $\mu\text{V}$ ) | Area ( $\mu\text{V}\cdot\text{sec}$ ) | Area (%) |
|-------|----------------|--------------------------|---------------------------------------|----------|
| 1     | 7.453          | 903338                   | 54406623                              | 49.765   |
| 2     | 10.241         | 833728                   | 54920967                              | 50.235   |
| total |                | 1737066                  | 109327590                             | 100.000  |

**Table S31.** HPLC trace of 4-((tert-butyldiphenylsilyl)oxy)butan-2-ol.

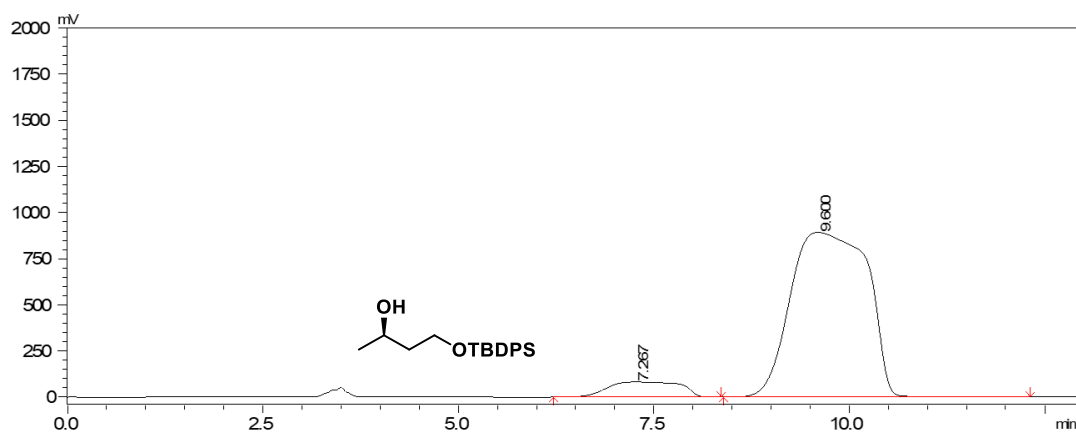

**Figure S76.** HPLC trace of (*R*)-4-((tert-butyldiphenylsilyl)oxy)butan-2-ol.

| #     | Ret Time (min) | Height ( $\mu\text{V}$ ) | Area ( $\mu\text{V}\cdot\text{sec}$ ) | Area (%) |
|-------|----------------|--------------------------|---------------------------------------|----------|
| 1     | 7.267          | 81614                    | 5311046                               | 7.983    |
| 2     | 9.600          | 892271                   | 61222397                              | 92.017   |
| total |                | 973884                   | 66533442                              | 100.000  |

**Table S32.** HPLC trace of (*R*)-4-((tert-butyldiphenylsilyl)oxy)butan-2-ol.

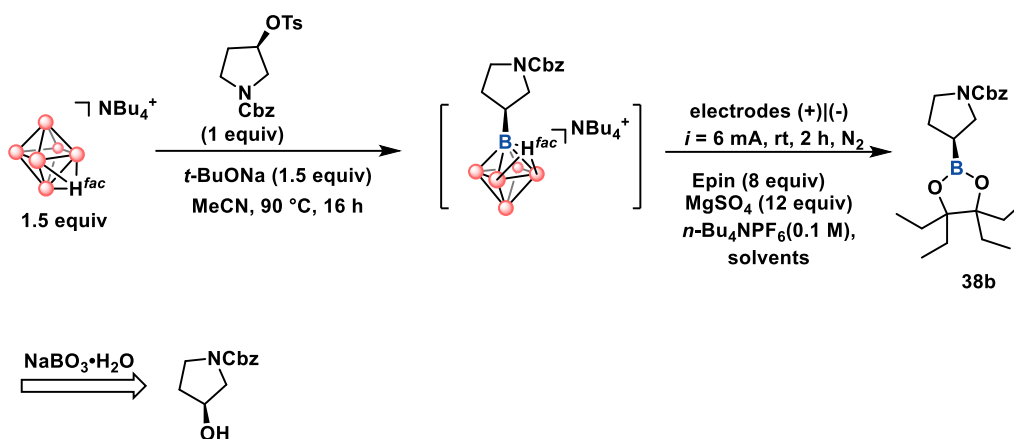

To a 10 mL oven dried Schlenk tube equipped with a magnetic stir bar,  $n\text{-Bu}_4\text{N}(\text{B}_6\text{H}_7)$  (**1**) (92.6 mg, 0.3 mmol, 1.5 equiv), and  $t\text{-BuONa}$  (29.5 mg, 0.3 mmol, 1.5 equiv) were added sequentially. The tube was evacuated and backfilled with  $\text{N}_2$  three times. Dry MeCN (1 mL) was added via syringe. Then the solution of benzyl (*R*)-3-(tosyloxy)pyrrolidine-1-carboxylate (75.3 mg, 0.2 mmol, 1 equiv) in dry MeCN (1 mL) was added. The mixture was then magnetically stirred while being heated in oil bath  $90^\circ\text{C}$  for 16 hours. Then the heating bath was removed and flask was cooled down to room temperature. The solvent was removed *in vacuo* and resulting oil was washed with hexane (3 mL $\times$ 3), from  $^{11}\text{B}$  NMR the conversion could be determined as 76%.

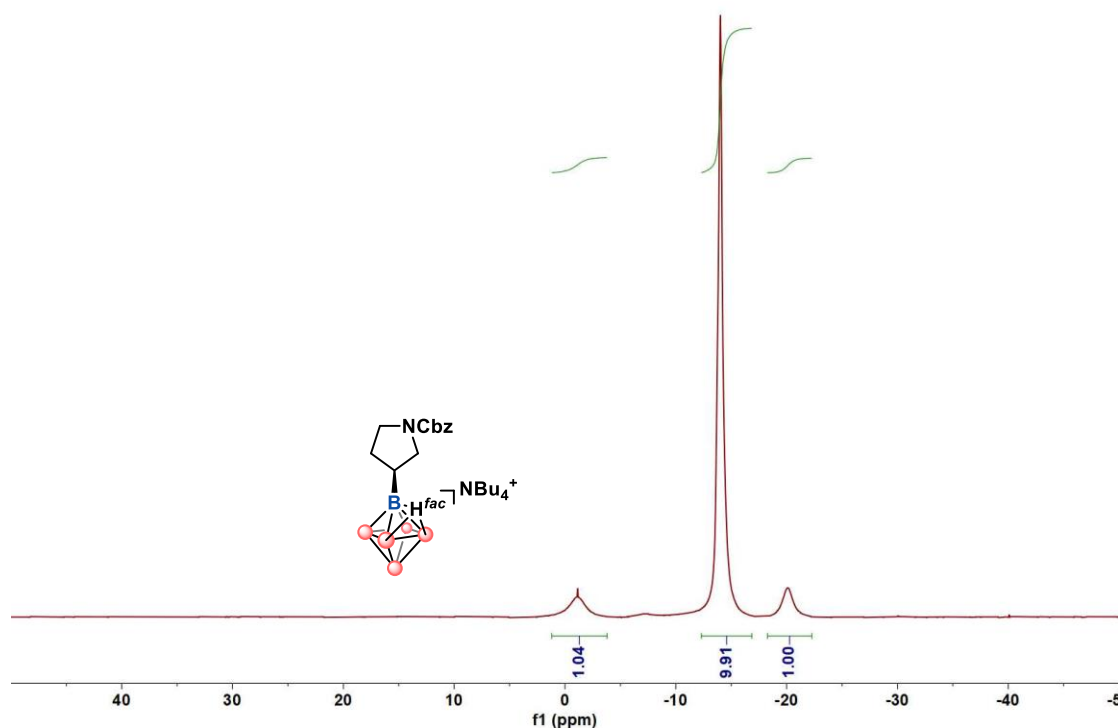

**Figure S77.**  $^{11}\text{B}\{^1\text{H}\}$  NMR spectrum after substitution step with benzyl (*R*)-3-(tosyloxy)pyrrolidine-1-carboxylate.

**Electrolysis set up 1** is used. To a 5 mL electrochemical reaction cell equipped with a magnetic stir bar, 3,4-Diethyl-3,4-hexanediol (279.5 mg, 1.6 mmol, 8 equiv),  $\text{MgSO}_4$  (287.3 mg, 2.4 mmol, 12 equiv), and  $\text{TBAPF}_6$  (115.8 mg, 0.3 mmol, 0.1 M) were added. The cell was evacuated

and backfilled with N<sub>2</sub> three times. Dry MeCN (1.5 mL) was added. Then the solution of the crude product of the substituted cluster in dry TCE (1.5 mL) was added. The undivided cell was equipped with RVC (3.5 mm×0.5 mm×0.4 mm) as the anode and RVC (3.5 mm×0.5 mm×0.4 mm) as the cathode and then backfilled with N<sub>2</sub> to replace air atmosphere. The mixture was pre-stirred for five minutes, and then the reaction mixture was electrolyzed at a constant current of 6 mA until passing 2.20 F/mol of total charge (2 hours) at room temperature. The solvent was removed under reduced pressure and the residual solids were extracted with ethyl acetate (10 mL). The extract was concentrated and subjected to column separation (silica gel, Petroleum: EtOAc= 15:1) to afford the product (46.9 mg,  $[\alpha]_D^{21.4} = -3.5$  (c = 0.4, CHCl<sub>3</sub>)) in 60% yield.  $R_f = 0.29$  (Petroleum: EtOAc = 8:1).

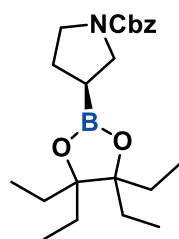

**38b**

<sup>1</sup>H NMR (400 MHz, CDCl<sub>3</sub>) δ 7.38 – 7.28 (m, 5H), 5.17 – 5.09 (m, 2H), 3.63 – 3.52 (m, 2H), 3.35 – 3.25 (m, 2H), 2.04 – 1.98 (m, 1H), 1.83 – 1.80 (m, 1H), 1.69 – 1.57 (m, 9H), 0.89 (t, *J* = 7.5 Hz, 12H).

<sup>13</sup>C{<sup>1</sup>H} NMR (101 MHz, CDCl<sub>3</sub>) δ 158.66, 137.21, 128.39, 127.77, 88.50, 66.51, 48.66, 47.09, 28.51, 26.37, 26.35, 8.75, 8.73.

<sup>11</sup>B{<sup>1</sup>H} NMR (193 MHz, CDCl<sub>3</sub>) δ 32.88.

HR-MS (EI) for C<sub>22</sub>H<sub>34</sub><sup>11</sup>BNO<sub>4</sub> [M] *m/z* [M]<sup>+</sup>: calculated: 387.2581 found: 387.2584

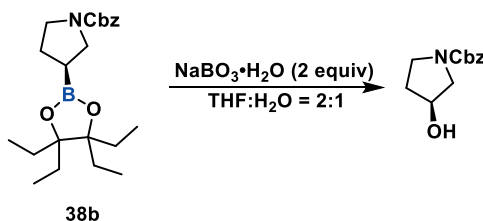

**38b**

Benzyl (*S*)-3-(4,4,5,5-tetraethyl-1,3,2-dioxaborolan-2-yl)pyrrolidine-1-carboxylate (38.7 mg, 0.1 mmol) was dissolved in THF (1.0 mL) and transferred to 20 mL vial, then NaBO<sub>3</sub>·H<sub>2</sub>O (21.2 mg, 0.2 mmol) and H<sub>2</sub>O (0.5 mL) were added and the mixture was stirred at room temperature for 4 hours. Upon complete consumption of the substrate, the mixture was extracted with Et<sub>2</sub>O (3 mL×3) and dried over Na<sub>2</sub>SO<sub>4</sub>. Column separation (silica gel, Petroleum: EtOAc = 2:1) afforded a colorless oil (10.6 mg, 48%, 94:6 *e.r.*). The *e.r.* was determined on HPLC system with IF column (20% *i*-PrOH/hexanes, flow rate 1.0 mL/min, 25 °C); retention time for compound (Fig. S79): *t*<sub>1</sub> = 7.709 min (minor), *t*<sub>2</sub> = 9.066 min (major).

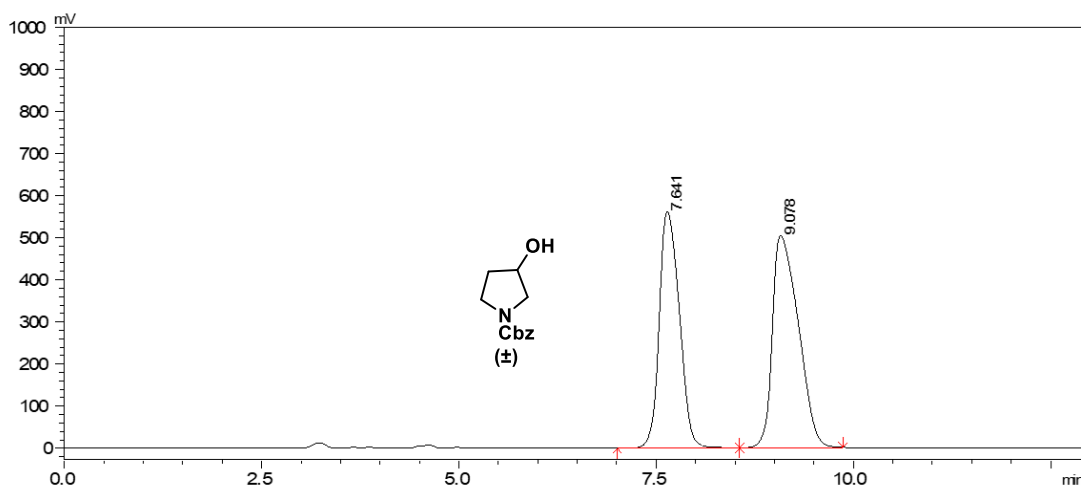

**Figure S78.** HPLC trace of benzyl 3-hydroxypyrrolidine-1-carboxylate.

| #     | Ret Time (min) | Height ( $\mu\text{V}$ ) | Area ( $\mu\text{V}\cdot\text{sec}$ ) | Area (%) |
|-------|----------------|--------------------------|---------------------------------------|----------|
| 1     | 7.641          | 562125                   | 9955785                               | 46.348   |
| 2     | 9.078          | 504502                   | 11524549                              | 53.652   |
| total |                | 1066627                  | 21480334                              | 100.000  |

**Table S33.** HPLC trace of benzyl 3-hydroxypyrrolidine-1-carboxylate.

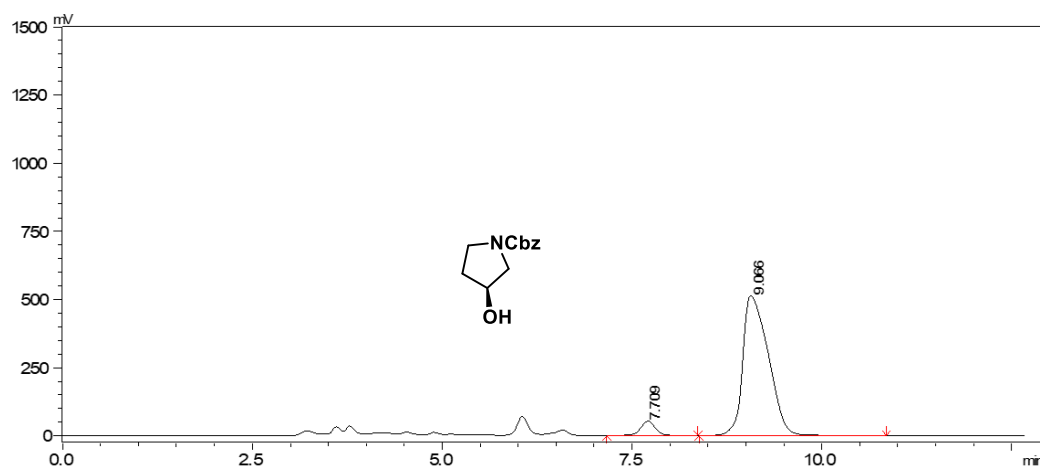

**Figure S79.** HPLC trace of benzyl (*S*)-3-hydroxypyrrolidine-1-carboxylate.

| #     | Ret Time (min) | Height ( $\mu\text{V}$ ) | Area ( $\mu\text{V}\cdot\text{sec}$ ) | Area (%) |
|-------|----------------|--------------------------|---------------------------------------|----------|
| 1     | 7.709          | 52830                    | 705793                                | 5.544    |
| 2     | 9.066          | 513769                   | 12024251                              | 94.456   |
| total |                | 566599                   | 12730044                              | 100.000  |

**Table S34.** HPLC trace of benzyl (*S*)-3-hydroxypyrrolidine-1-carboxylate.

## 9. Intramolecular nucleophilic borylation of unactivated alkyl chloride

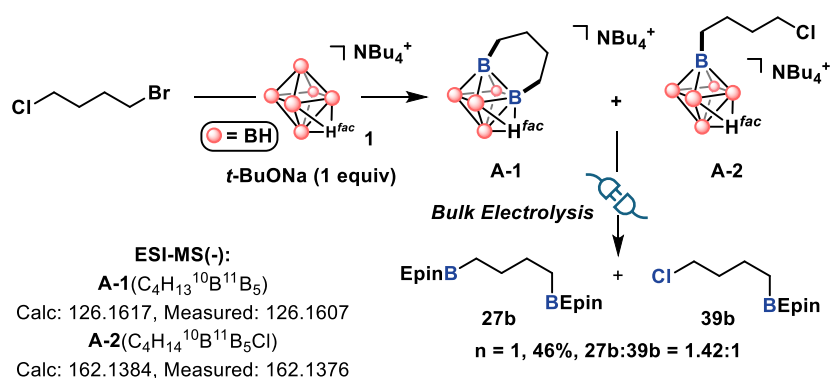

To a 10 mL oven dried Schlenk tube equipped with a magnetic stir bar, *n*-Bu<sub>4</sub>N(B<sub>6</sub>H<sub>7</sub>) (**1**) (123.7 mg, 0.4 mmol, 2 equiv), and *t*-BuONa (19.6 mg, 0.2 mmol, 1 equiv) were added sequentially. The tube was evacuated and backfilled with N<sub>2</sub> three times. Dry MeCN (1 mL) was added via syringe. Then the solution of 1-bromo-4-chlorobutane (37.3 mg, 0.2 mmol, 1 equiv) in dry MeCN (1 mL) was added. The mixture was then magnetically stirred while being heated in oil bath 100 °C for 12 hours. Then the heating bath was removed and flask was cooled down to room temperature. The solvent was removed *in vacuo* and resulting oil was washed with hexane (3 mL×3), from <sup>11</sup>B NMR the conversion could be determined.

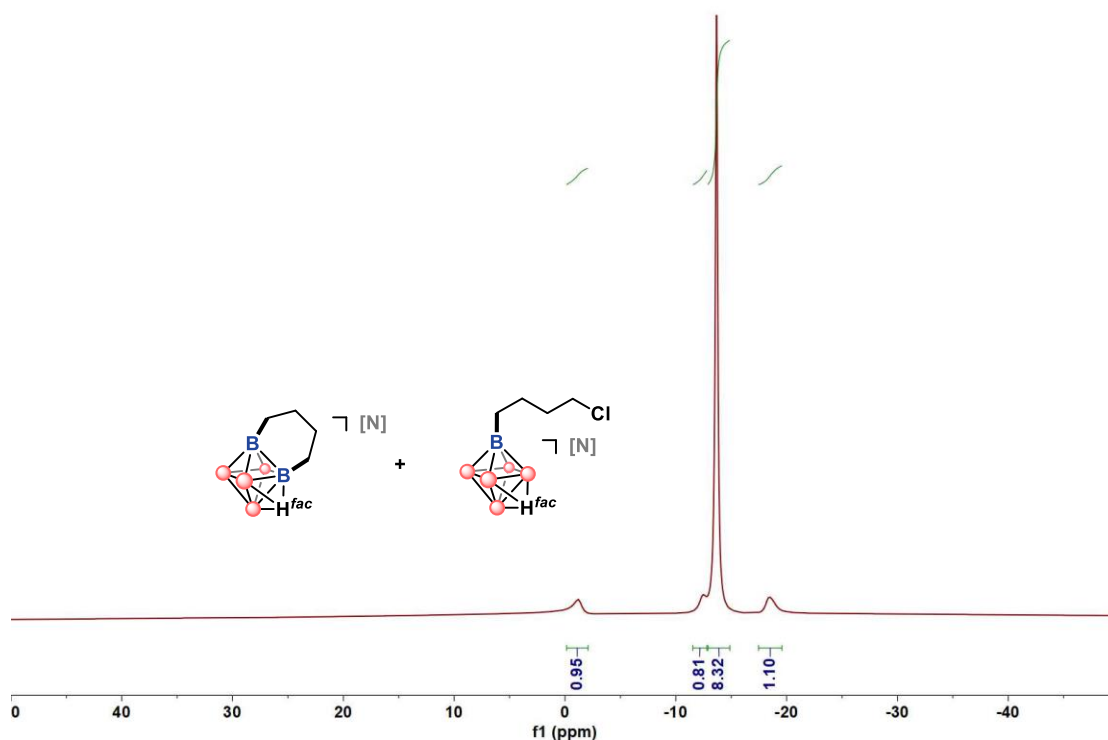

**Figure S80.** <sup>11</sup>B{<sup>1</sup>H} NMR spectrum after substitution step with 1-bromo-4-chlorobutane

XHH-4-63-1-NEG #135 RT: 0.09 AV: 1 NV: 1 5757  
T: FTMS - p ESI Full ms[100.000]

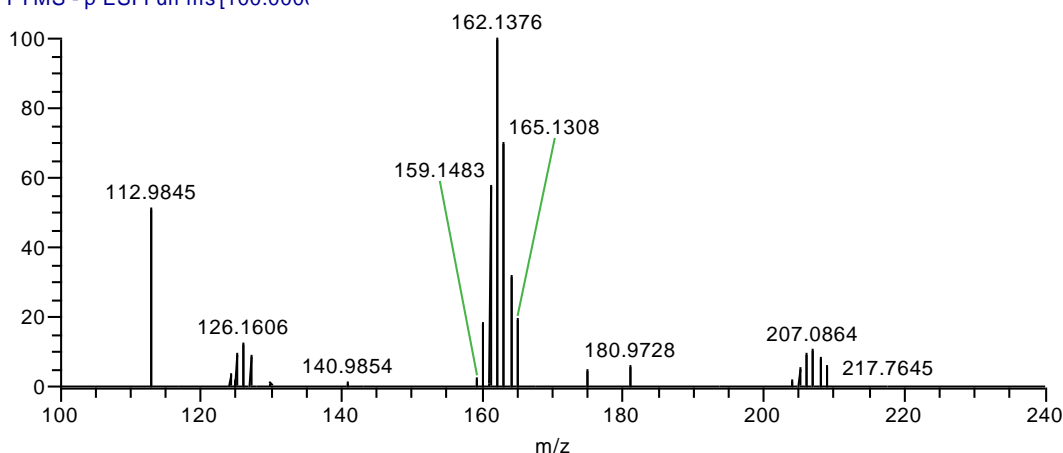

**Figure S81.** ESI-MS(-) of reaction mixture containing **A-1** and **A-2**.

**Electrolysis set up 1** is used. To a 5 mL electrochemical reaction cell equipped with a magnetic stir bar, 3,4-Diethyl-3,4-hexanediol (280.1 mg, 1.6 mmol, 8 equiv),  $\text{MgSO}_4$  (289.4 mg, 2.4 mmol, 12 equiv), and  $\text{TBAPF}_6$  (120.6 mg, 0.3 mmol, 0.1 M) were added. The cell was evacuated and backfilled with  $\text{N}_2$  three times. Dry MeCN (1.5 mL) was added. Then the solution of the crude product of the substituted cluster in dry TCE (1.5 mL) was added. The undivided cell was equipped with RVC (3.5 mm $\times$ 0.5 mm $\times$ 0.4 mm) as the anode and RVC (3.5 mm $\times$ 0.5 mm $\times$ 0.4 mm) as the cathode and then backfilled with  $\text{N}_2$  to replace air atmosphere. The mixture was pre-stirred for five minutes, and then the reaction mixture was electrolyzed at a constant current of 6 mA until passing 2.20 F/mol of total charge (2 hours) at room temperature. The solvent was removed under reduced pressure and the residual solids were extracted with ethyl acetate (10 mL).

The extract was concentrated and subjected to column separation (silica gel, Petroleum: Diethyl ether= 80:1) to afford the 2-(4-chlorobutyl)-4,4,5,5-tetraethyl-1,3,2-dioxaborolane (11.1 mg) in 19% yield and 1,4-bis(4,4,5,5-tetraethyl-1,3,2-dioxaborolan-2-yl)butane (24.6 mg) in 27% yield.

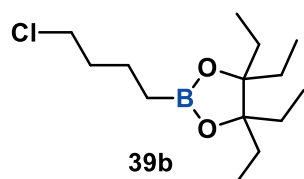

2-(4-chlorobutyl)-4,4,5,5-tetraethyl-1,3,2-dioxaborolane

$^1\text{H NMR}$  (400 MHz,  $\text{CDCl}_3$ )  $\delta$  3.53 (t,  $J$  = 6.8 Hz, 2H), 1.82 – 1.75 (m, 2H), 1.70 – 1.61 (m, 8H), 1.58 – 1.51 (m, 2H), 0.90 (t,  $J$  = 7.5 Hz, 12H), 0.80 (t,  $J$  = 7.9 Hz, 2H).

$^{13}\text{C}\{^1\text{H}\}$  NMR (101 MHz,  $\text{CDCl}_3$ )  $\delta$  88.05, 44.95, 35.11, 26.35, 21.57, 8.78.

$^{11}\text{B}\{^1\text{H}\}$  NMR (193 MHz,  $\text{CDCl}_3$ )  $\delta$  33.35.

**HR-MS (EI)** for  $\text{C}_{14}\text{H}_{28}^{11}\text{BO}_2\text{Cl}$  [M]  $m/z$  [M] $^+$ : calculated: 274.1871, found: 274.1873

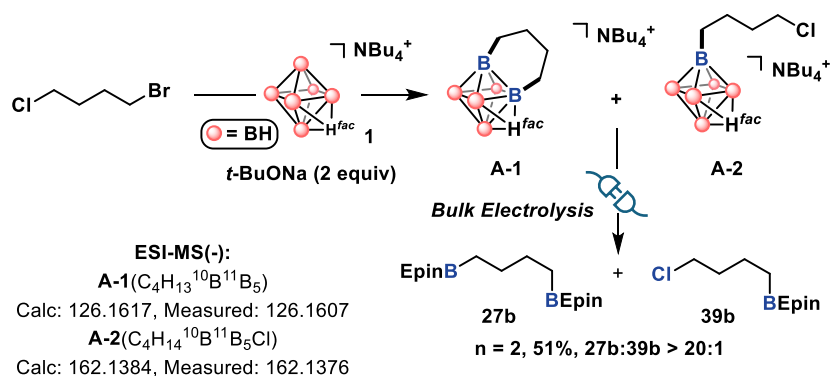

To a 10 mL oven dried Schlenk tube equipped with a magnetic stir bar, *n*-Bu<sub>4</sub>N(B<sub>6</sub>H<sub>7</sub>) (**1**) (122.2 mg, 0.4 mmol, 2 equiv), and *t*-BuONa (39.8 mg, 0.4 mmol, 2 equiv) were added sequentially. The tube was evacuated and backfilled with N<sub>2</sub> three times. Dry MeCN (1 mL) was added via syringe. Then the solution of 1-Bromo-4-chlorobutane (37.3 mg, 0.2 mmol, 1 equiv) in dry MeCN (1 mL) was added. The mixture was then magnetically stirred while being heated in oil bath 100 °C for 12 hours. Then the heating bath was removed and flask was cooled down to room temperature. The solvent was removed *in vacuo* and resulting oil was washed with hexane (3 mL×3), from <sup>11</sup>B NMR the conversion could be determined.

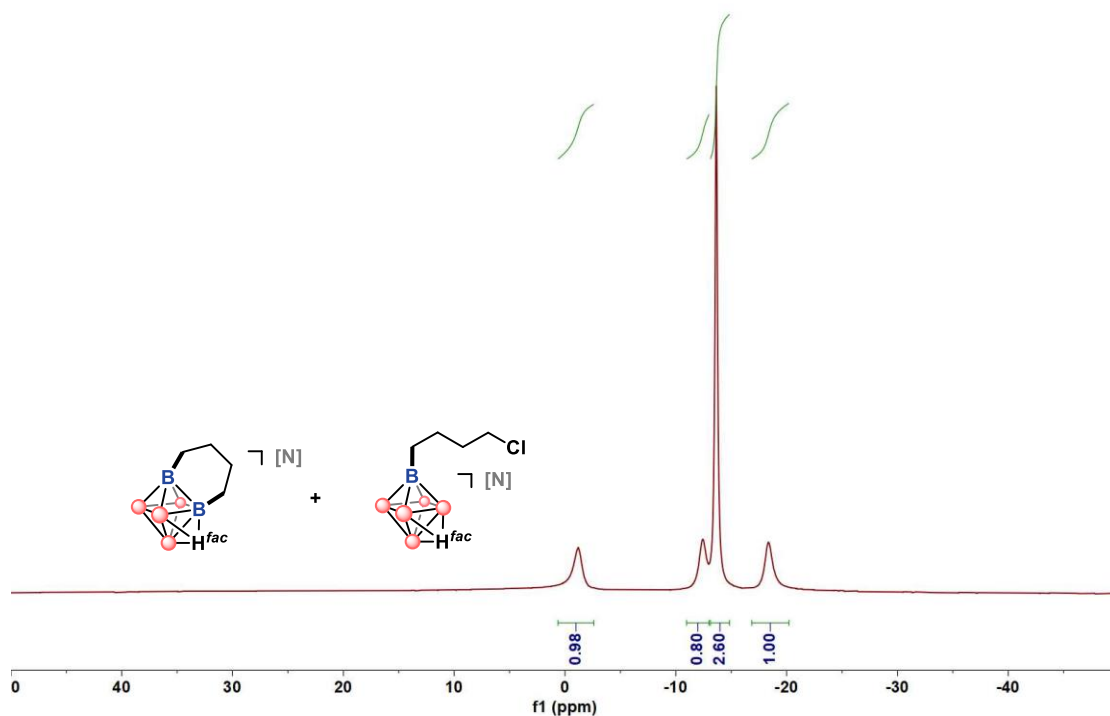

**Figure S82.** <sup>11</sup>B{<sup>1</sup>H} NMR spectrum after substitution step with 1-bromo-4-chlorobutane



XHH-4-62-1-NEG #150 RT: 0.10 AM: 1 NL: 2.0557  
T: FTMS - p ESI Full ms[100.000]

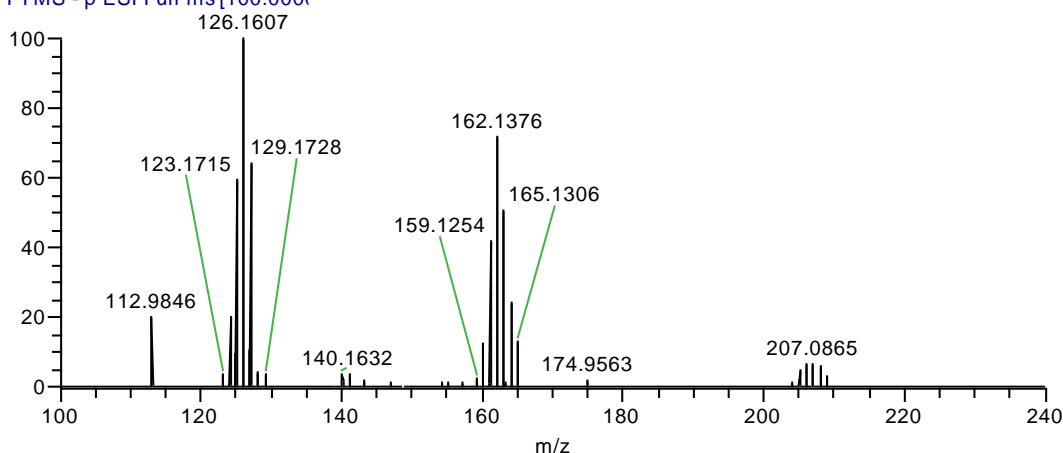

**Figure S83.** ESI-MS(-) of reaction mixture containing.

**Electrolysis set up 1** is used. To a 5 mL electrochemical reaction cell equipped with a magnetic stir bar, 3,4-Diethyl-3,4-hexanediol (281.7 mg, 1.6 mmol, 8 equiv),  $\text{MgSO}_4$  (290.2 mg, 2.4 mmol, 12 equiv), and  $\text{TBAPF}_6$  (115.8 mg, 0.3 mmol, 0.1 M) were added. The cell was evacuated and backfilled with  $\text{N}_2$  three times. Dry MeCN (1.5 mL) was added. Then the solution of the crude product of the substituted cluster in dry TCE (1.5 mL) was added. The undivided cell was equipped with RVC (3.5 mm $\times$ 0.5 mm $\times$ 0.4 mm) as the anode and RVC (3.5 mm $\times$ 0.5 mm $\times$ 0.4 mm) as the cathode and then backfilled with  $\text{N}_2$  to replace air atmosphere. The mixture was pre-stirred for five minutes, and then the reaction mixture was electrolyzed at a constant current of 6 mA until passing 2.20 F/mol of total charge (2 hours) at room temperature. The solvent was removed under reduced pressure and the residual solids were extracted with ethyl acetate (10 mL). The extract was concentrated and subjected to column separation (silica gel, Petroleum: Diethyl ether= 80:1) to afford the 1,4-bis(4,4,5,5-tetraethyl-1,3,2-dioxaborolan-2-yl)butane (46.8mg) in 51% yield.

## 10. Investigations of the boron-containing fragments after the bulk electrolysis.

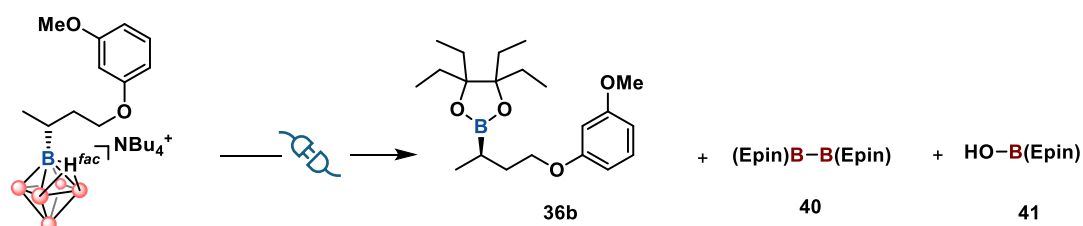

To a 10 mL oven dried Schlenk tube equipped with a magnetic stir bar, *n*-Bu<sub>4</sub>N(B<sub>6</sub>H<sub>7</sub>) (**1**) (120.1 mg, 0.4 mmol, 2 equiv), and *t*-BuONa (39.1 mg, 0.4 mmol, 2 equiv) were added sequentially. The tube was evacuated and backfilled with N<sub>2</sub> three times. Dry MeCN (1 mL) was added via syringe. Then the solution of (S)-4-(3-methoxyphenoxy)butan-2-yl 4-methylbenzenesulfonate (69.8 mg, 0.2 mmol, 1 equiv) in dry MeCN (1 mL) was added. The mixture was then magnetically stirred while being heated in oil bath 90 °C for 16 hours. Then the heating bath was removed and flask was cooled down to room temperature. The solvent was removed *in vacuo* and resulting oil was washed with hexane (3 mL×3).

**Electrolysis set up 1** (IKA ElectraSyn 2.0) is used. To a 5 mL electrochemical reaction cell equipped with a magnetic stir bar, 3,4-Diethyl-3,4-hexanediol (276.6 mg, 1.6 mmol, 8 equiv), MgSO<sub>4</sub> (289.6 mg, 2.4 mmol, 12 equiv), and TBAPF<sub>6</sub> (121.8 mg, 0.3 mmol, 0.1 M) were added. The cell was evacuated and backfilled with N<sub>2</sub> three times. Dry MeCN (1.5 mL) was added. Then the solution of the crude product of the substituted cluster in dry TCE (1.5 mL) was added. The undivided cell was equipped with RVC (3.5 mm×0.5 mm×0.4 mm) as the anode and RVC (3.5 mm×0.5 mm×0.4 mm) as the cathode and then backfilled with N<sub>2</sub> to replace air atmosphere. The mixture was pre-stirred for five minutes, and then the reaction mixture was electrolyzed at a constant current of 6 mA until passing 2.20 F/mol of total charge (2 hours) at room temperature. The solvent was removed under reduced pressure and the residual solids were extracted with ethyl acetate (10 mL). The extract was concentrated and subjected to column separation (silica gel, Petroleum: Diethyl ether= 80:1 - Petroleum: EtOAc = 8:1) to afford the product (48.5 mg) in 67% yield, 4,4,4',4',5,5,5',5'-octaethyl-2,2'-bi(1,3,2-dioxaborolane) (6.2 mg) in 3% yield and 4,4,5,5-tetraethyl-1,3,2-dioxaborolan-2-ol (142.2 mg) in 71% yield.

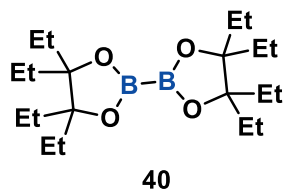

4,4,4',4',5,5,5',5'-octaethyl-2,2'-bi(1,3,2-dioxaborolane)

<sup>1</sup>H NMR (400 MHz, CDCl<sub>3</sub>) δ 1.75 – 1.59 (m, 16H), 0.90 (t, *J* = 7.5 Hz, 24H).

<sup>13</sup>C{<sup>1</sup>H} NMR (101 MHz, CDCl<sub>3</sub>) δ 88.31, 26.39, 8.95.

<sup>11</sup>B{<sup>1</sup>H} NMR (193 MHz, CDCl<sub>3</sub>) δ 29.61.

HR-MS (EI) for C<sub>20</sub>H<sub>40</sub><sup>11</sup>B<sub>2</sub>O<sub>4</sub> [M] *m/z* [M]<sup>+</sup>: calculated: 366.3113, found: 366.3112

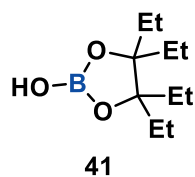

4,4,5,5-tetraethyl-1,3,2-dioxaborolan-2-ol

$^1\text{H NMR}$  (400 MHz,  $\text{CDCl}_3$ )  $\delta$  5.44 (s, 1H), 1.76 – 1.65 (m, 8H), 0.91 (t,  $J = 7.5$  Hz, 12H).

$^{13}\text{C}\{^1\text{H}\}$  NMR (101 MHz,  $\text{CDCl}_3$ )  $\delta$  88.34, 26.21, 8.55.

$^{11}\text{B}\{^1\text{H}\}$  NMR (193 MHz,  $\text{CDCl}_3$ )  $\delta$  22.00.

HR-MS (EI) for  $\text{C}_{20}\text{H}_{40}^{11}\text{B}_2\text{O}_5$  [M]  $m/z$  [(Epin)B-O-B(Epin)] $^+$ : calculated: 382.3062, found: 382.3059

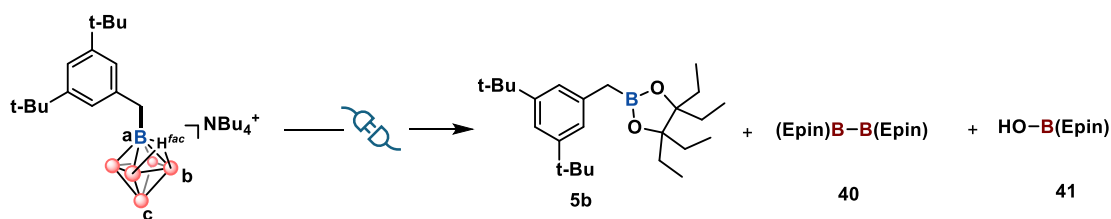

**Method E** are applied. The extract was concentrated and subjected to column separation (silica gel, Petroleum: Diethyl ether = 80:1 - Petroleum: EtOAc = 8:1) to afford the product (49.0 mg) in 63% yield, 4,4,4',4',5,5,5',5'-octaethyl-2,2'-bi(1,3,2-dioxaborolane) (13.6 mg) in 7% yield and 4,4,5,5-tetraethyl-1,3,2-dioxaborolan-2-ol (101.8 mg) in 51% yield.

## 11. References and notes

- (1) X. Mu, J. C. Axtell, N. A. Bernier, K. O. Kirlikovali, D. Jung, A. Umanson, K. Qian, X. Chen, K. L. Bay, M. Kirolos, A. L. Rheingold, K. N. Houk and A. M. Spokoyny, *Chem.*, 2019, **5**, 2461–2469.
- (2) Chen, S and Shen, F, *J Incl Phenom Macrocycl Chem.*, 2017, **88**, 229-238.
- (3) C.-T. Yang, Z.-Q Zhang, H. Tajuddin, C.-C. Wu, J. Liang, J.-H. Liu, Y. Fu, M. Czyzewska, P. G. Steel, T. B. Marder and L. Liu, *Angew. Chem. Int. Ed.*, 2012, **51**, 2, 528-532.
- (4) R. De Gasparo, E. Brodbeck-Persch, S. Bryson, N. B. Hentzen, M. Kaiser, E. F. Pai, R. L. Krauth-Siegel, and F. Diederich, *ChemMedChem.*, 2018, **13**, 957–967.
- (5) C. Andersen, V. Ferey, M. Daumas, P. Bernardelli, A. Guérinot and J. Cossy, *Org. Lett.*, 2020, **22**, 15, 6021–6025.
- (6) M. H. Shaw, R. A. Croft, W. G. Whittingham and J. F. Bower, *J. Am. Chem. Soc.*, 2015, **137**, 25, 8054–8057.
- (7) J. Katarzyńska, A. Mazur, M. Bilka, E. Adamek, M. Zimecki, S. Jankowski and J. Zabrocki, *J. Pept. Sci.*, 2008, **14**, 1283–1294.
- (8) R. J. Comito, F. G. Finelli and D. W. C. MacMillan, *J. Am. Chem. Soc.*, 2013, **135**, 25, 9358–9361.
- (9) T. Yoshida, M. Murai, M. Abe, N. Ichimaru, T. Harada, T. Nishioka and H. Miyoshi, *Biochemistry.*, 2007, **46**, 36, 10365–10372.
- (10) B. T. Sargent and E. J. Alexanian, *J. Am. Chem. Soc.*, 2017, **139**, 36, 12438–12440.
- (11) T. C. Atack, R. M. Lecker and S. P. Cook, *J. Am. Chem. Soc.*, 2014, **136**, 27, 9521–9523
- (12) F. Lima, M. A. Kabeshov, D. N. Tran, C. Battilocchio, J. Sedelmeier, G. Sedelmeier, B. Schenkel and S. V. Ley, *Angew. Chem. Int. Ed.*, 2016, **128**, 14291–14295.
- (13) C Kuhwald and A Kirschning, *Org. Lett.*, 2021, **23**, 11, 4300–4304.
- (14) L. Zhang, Z. Q. Wu and L. Jiao, *Angew. Chem. Int. Ed.*, 2020, **132**, 2111 –2115.
- (15) K. Suzuki, Y. Nishimoto and M. Yasuda, *Chem. Eur. J.*, 2021, **27**, 3968 – 3973.
- (16) R. Oeschger, B. Su, I. Yu, C. Ehinger, E. Romero, S. He and J. Hartwig, *Science.*, 2020 **368**, 736–741.
- (17) X. Wang, P. Cui, C. Xia and L. Wu, *Angew. Chem. Int. Ed.*, 2021, **60**, 12298 –12303.

## 12. NMR spectra of chiral alkyl pseudohalides

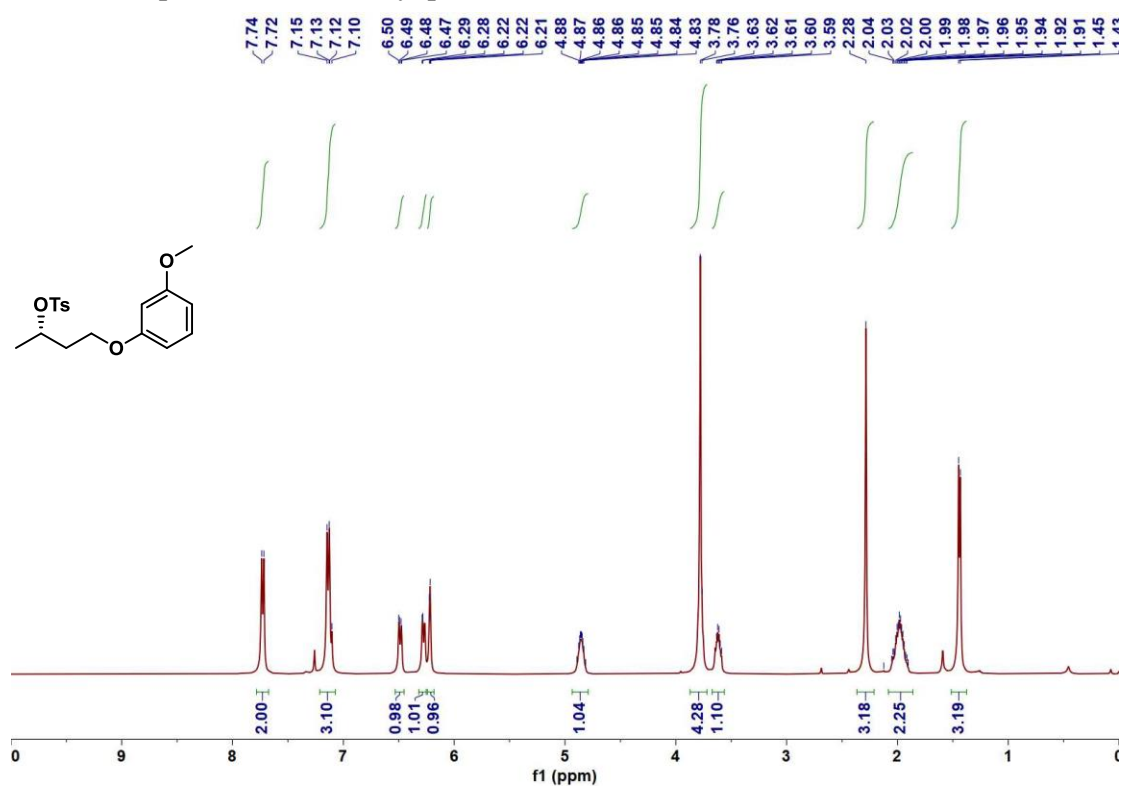

**Figure S84.** <sup>1</sup>H NMR spectrum of (*S*)-4-(3-methoxyphenoxy)butan-2-yl 4-methylbenzenesulfonate in CDCl<sub>3</sub> at 298K

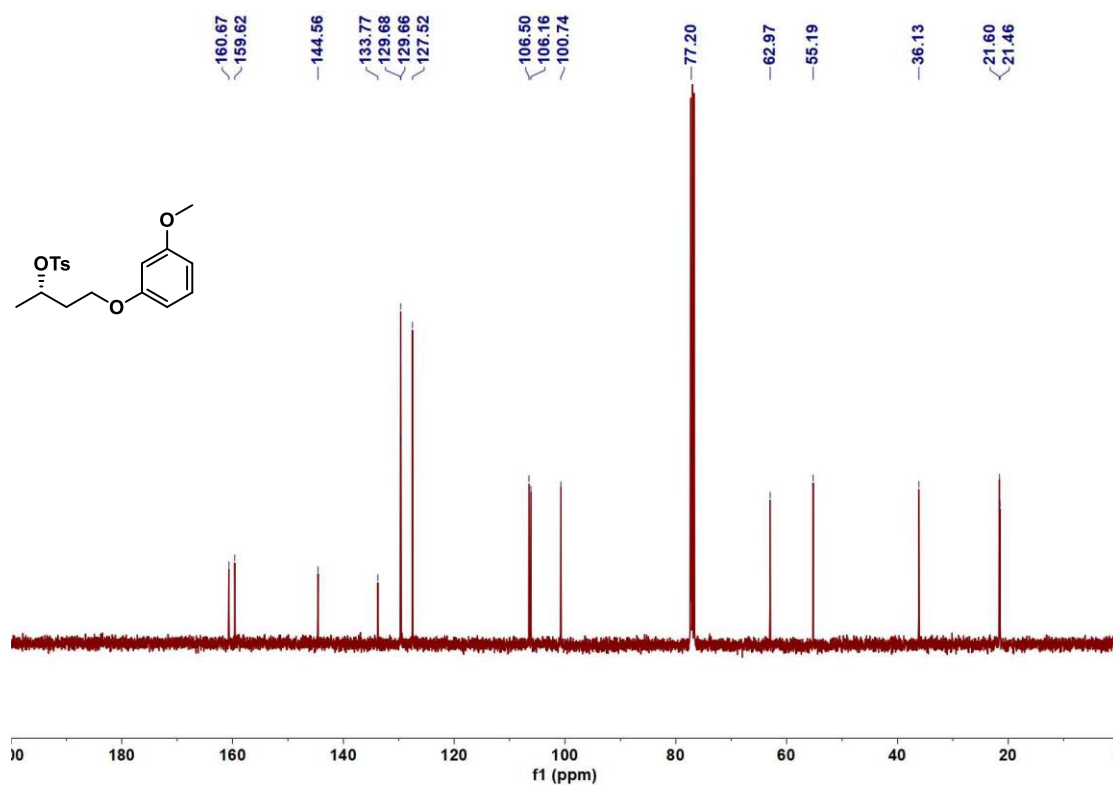

**Figure S85.**  $^{13}\text{C}\{^1\text{H}\}$  NMR spectrum of (*S*)-4-(3-methoxyphenoxy)butan-2-yl 4-methylbenzenesulfonate in  $\text{CDCl}_3$  at 298K

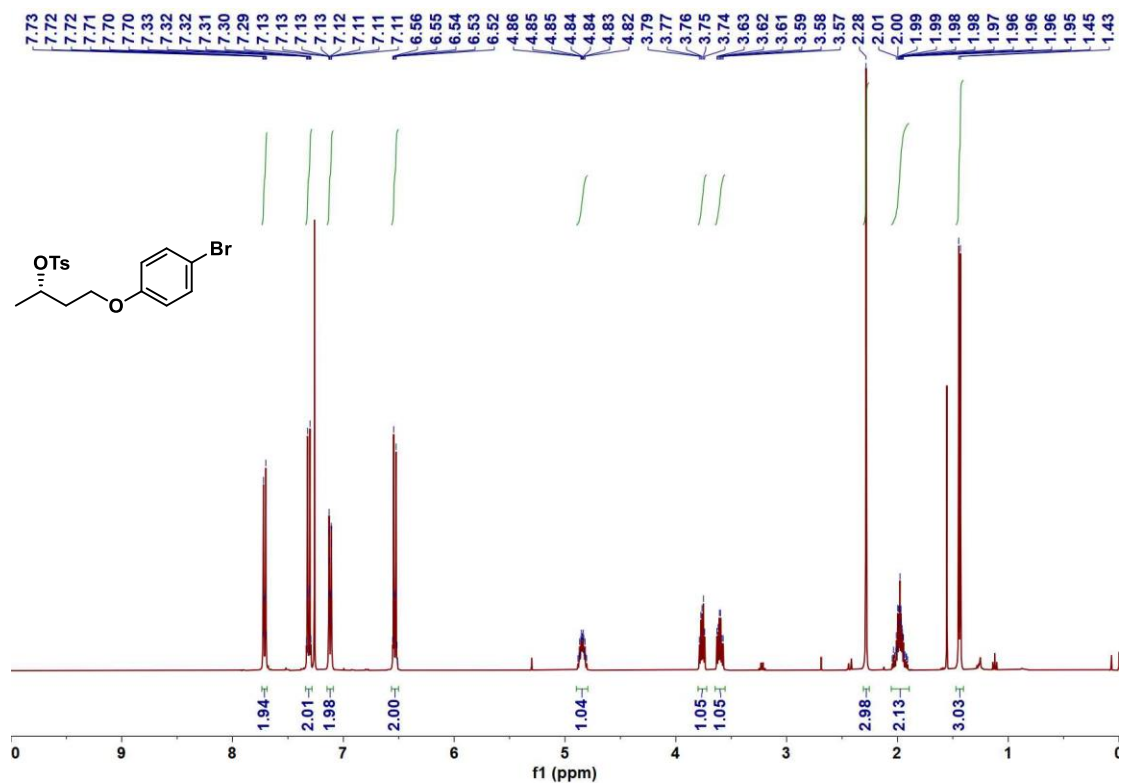

**Figure S86.** <sup>1</sup>H NMR spectrum of (S)-4-(4-bromophenoxy)butan-2-yl 4-methylbenzenesulfonate in CDCl<sub>3</sub> at 298K

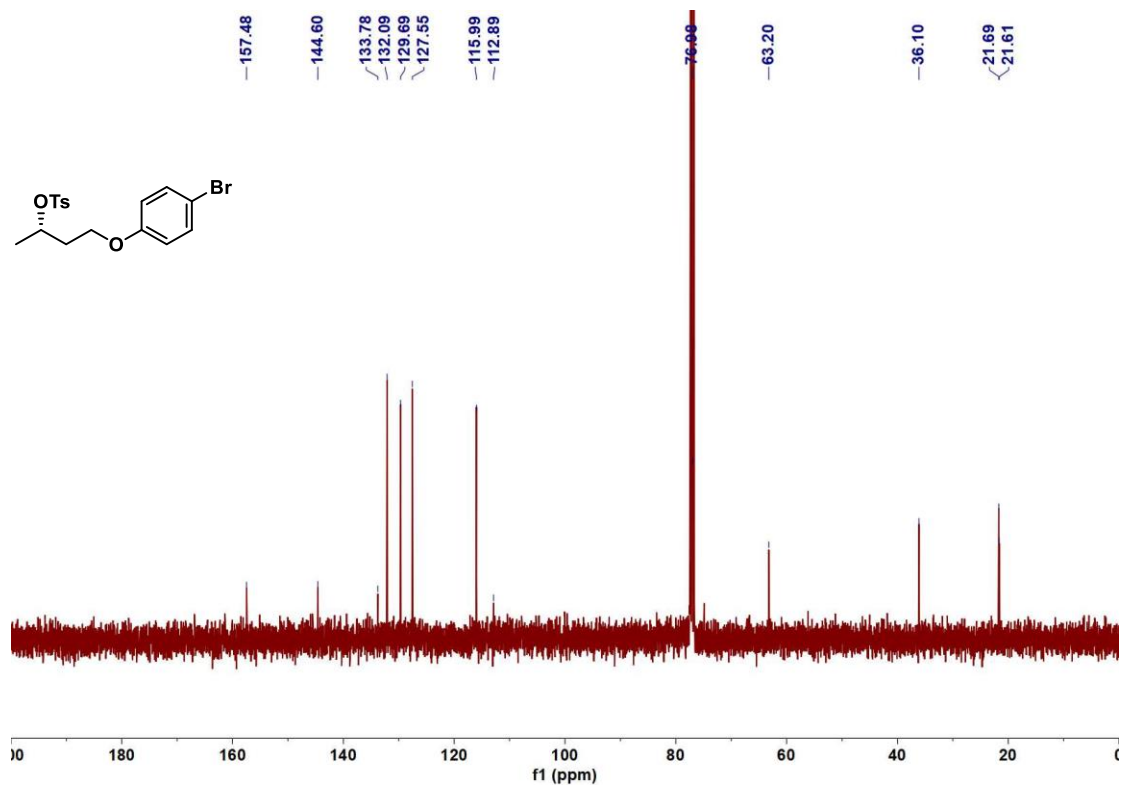

**Figure S87.** <sup>13</sup>C{<sup>1</sup>H} NMR spectrum of (*S*)-4-(4-bromophenoxy)butan-2-yl 4-methylbenzenesulfonate in CDCl<sub>3</sub> at 298K



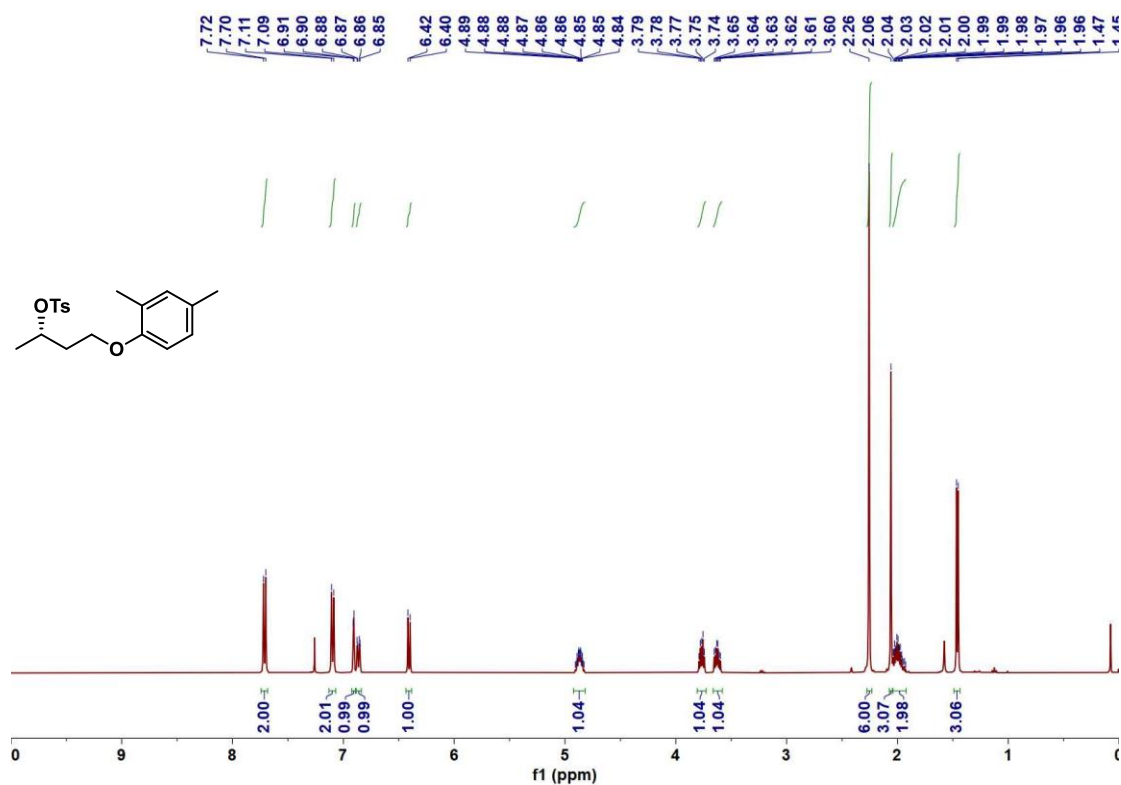

**Figure S88.** <sup>1</sup>H NMR spectrum of (S)-4-(2,4-dimethylphenoxy)butan-2-yl 4-methylbenzenesulfonate in CDCl<sub>3</sub> at 298K

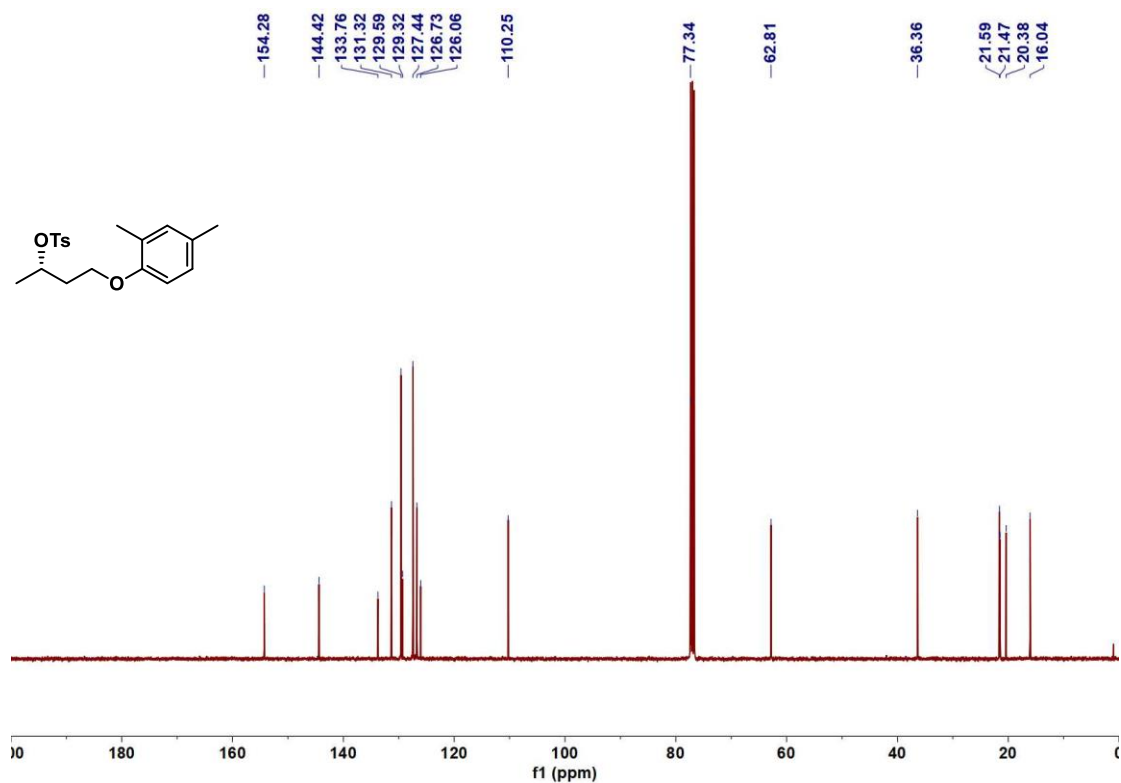

**Figure S89.**  $^{13}\text{C}\{^1\text{H}\}$  NMR spectrum of (*S*)-4-(2,4-dimethylphenoxy)butan-2-yl 4-methylbenzenesulfonate in  $\text{CDCl}_3$  at 298K

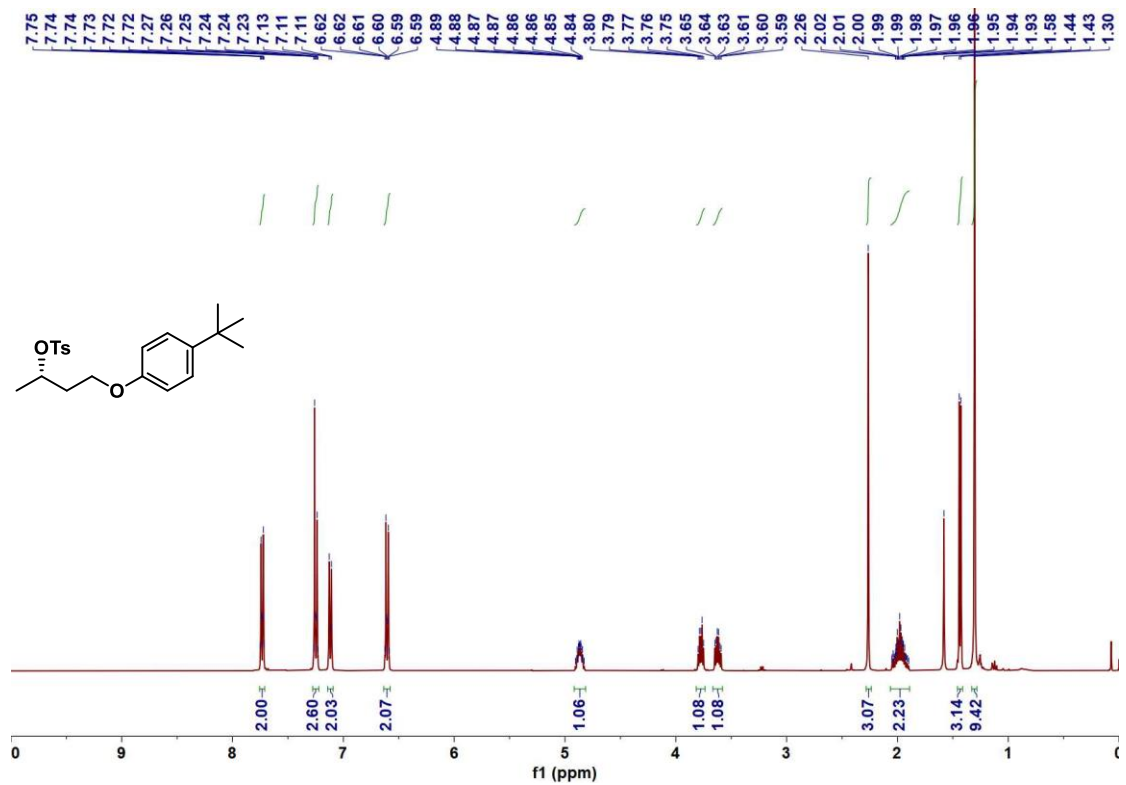

**Figure S90.**  $^1\text{H}$  NMR spectrum of (*S*)-4-(4-(*tert*-butyl)phenoxy)butan-2-yl 4-methylbenzenesulfonate in  $\text{CDCl}_3$  at 298K

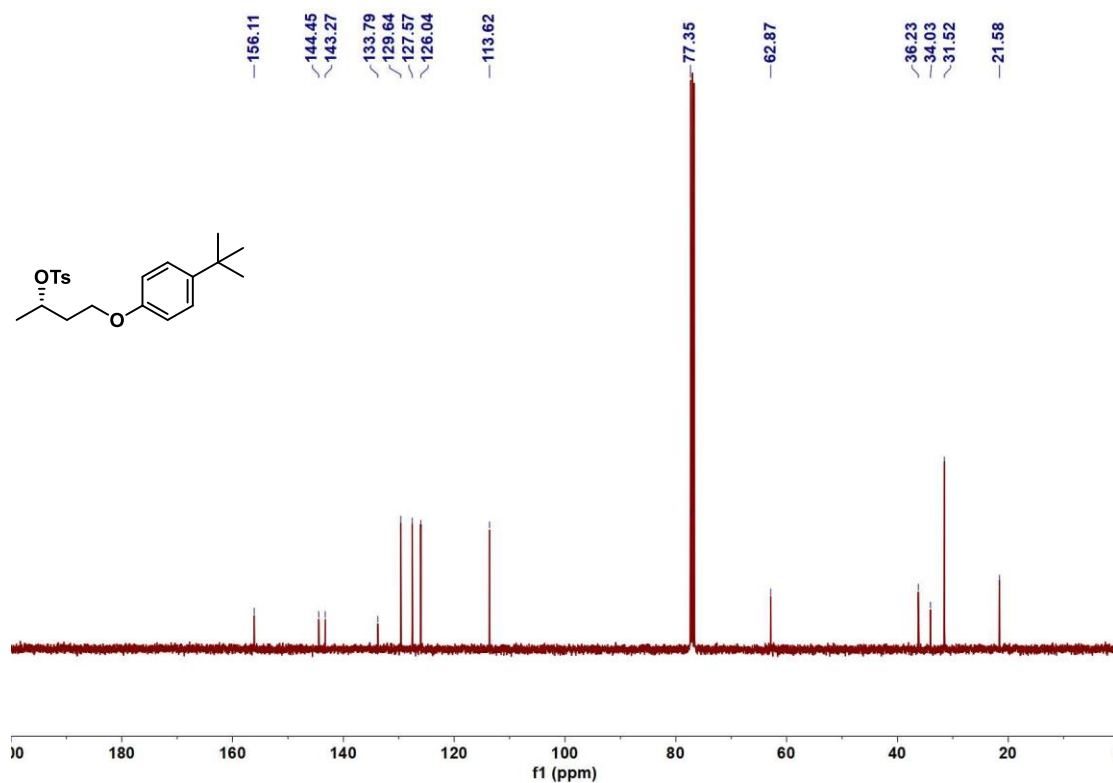

**Figure S91.**  $^{13}\text{C}\{^1\text{H}\}$  NMR spectrum of (*S*)-4-(4-(tert-butyl)phenoxy)butan-2-yl 4-methylbenzenesulfonate in CDCl<sub>3</sub> at 298K

### 13. NMR spectra of borylation products

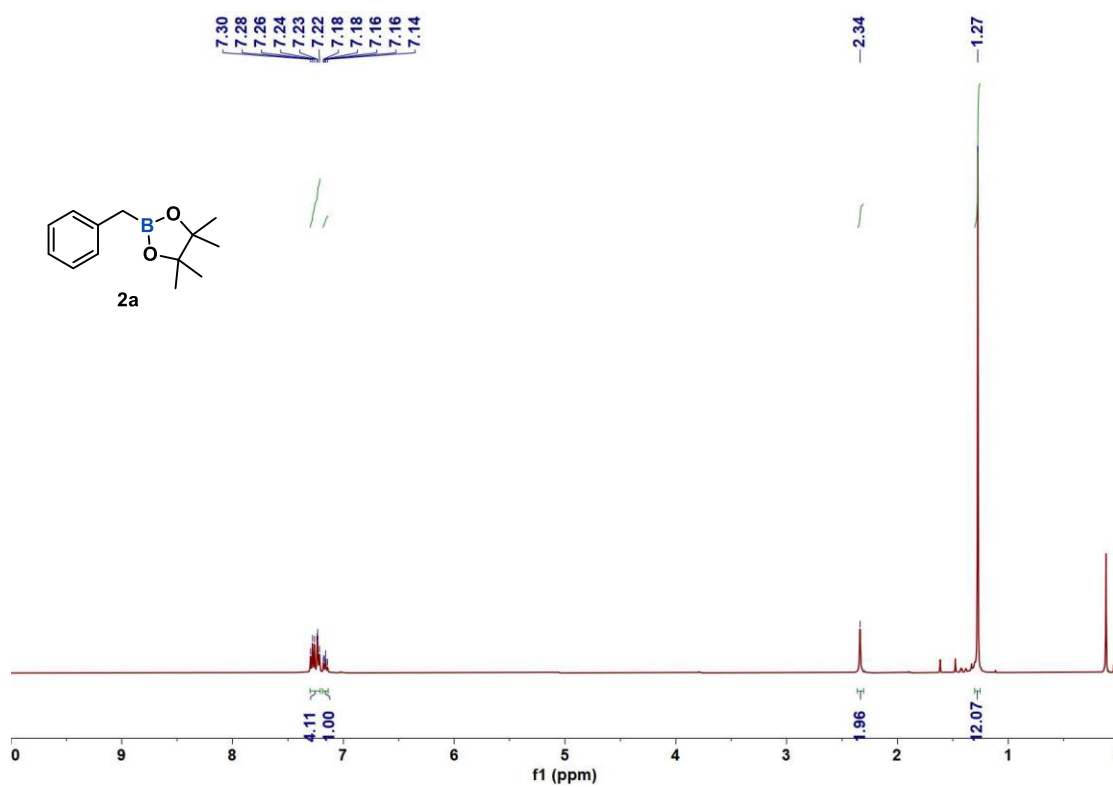

**Figure S92.** <sup>1</sup>H NMR spectrum of **2a** in CDCl<sub>3</sub> at 298K

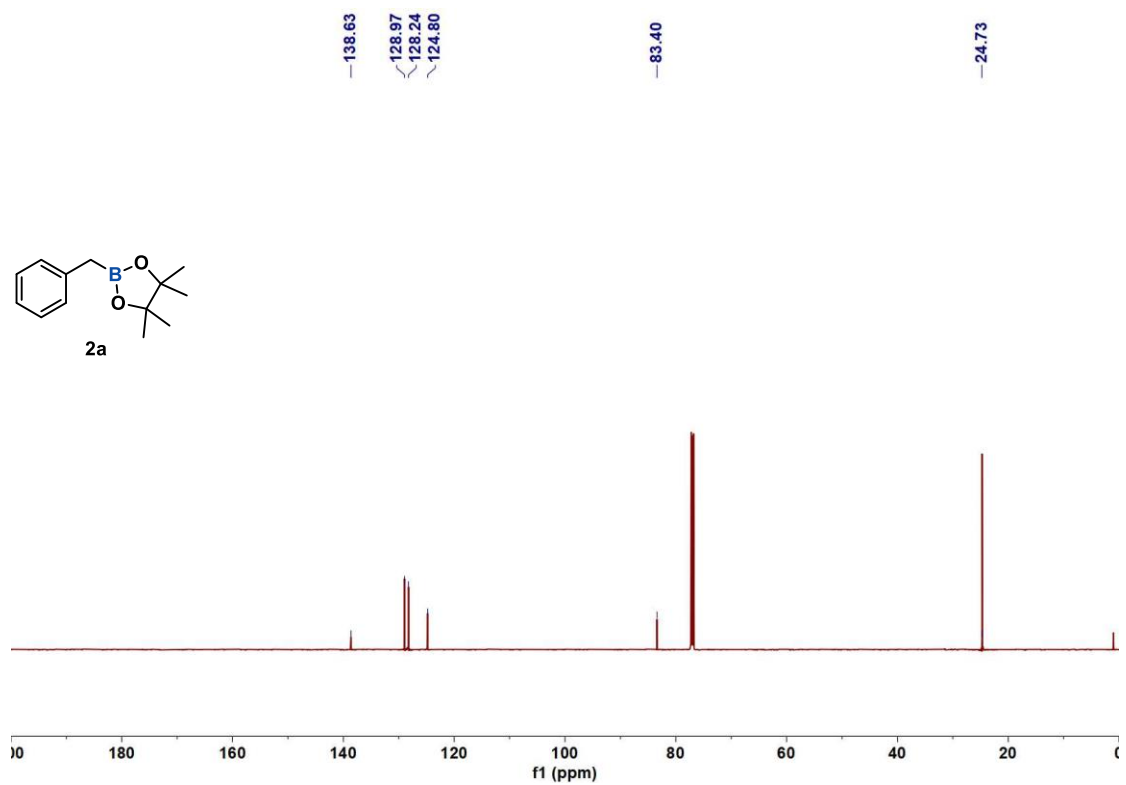

**Figure S93.**  $^{13}\text{C}\{^1\text{H}\}$  NMR spectrum of **2a** in  $\text{CDCl}_3$  at 298K

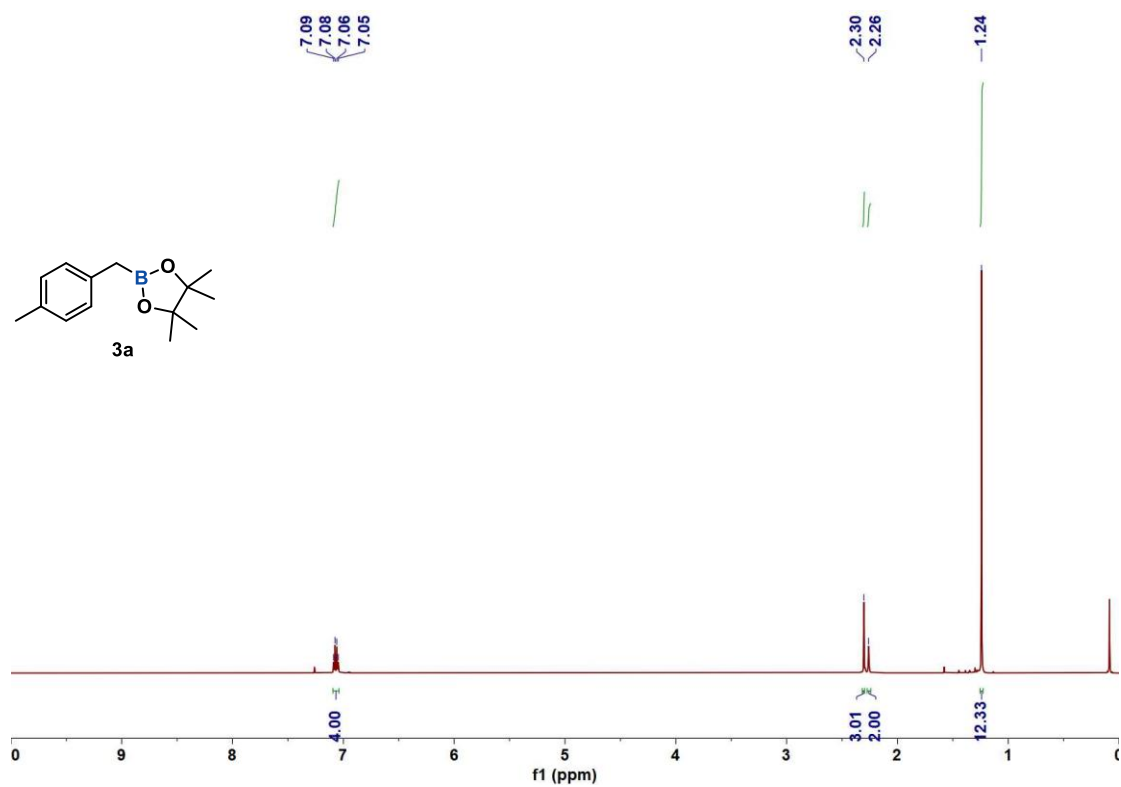

**Figure S94.**  $^1\text{H}$  NMR spectrum of **3a** in  $\text{CDCl}_3$  at 298K

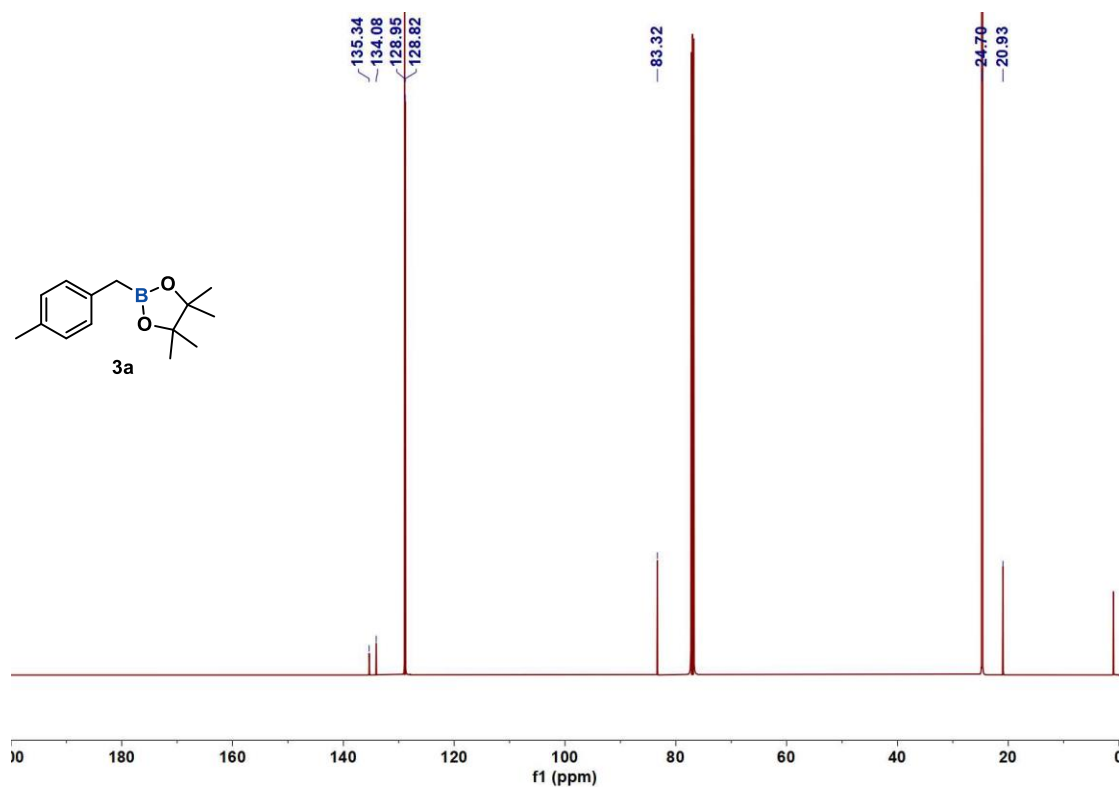

**Figure S95.**  $^{13}\text{C}\{^1\text{H}\}$  NMR spectrum of **3a** in  $\text{CDCl}_3$  at 298K



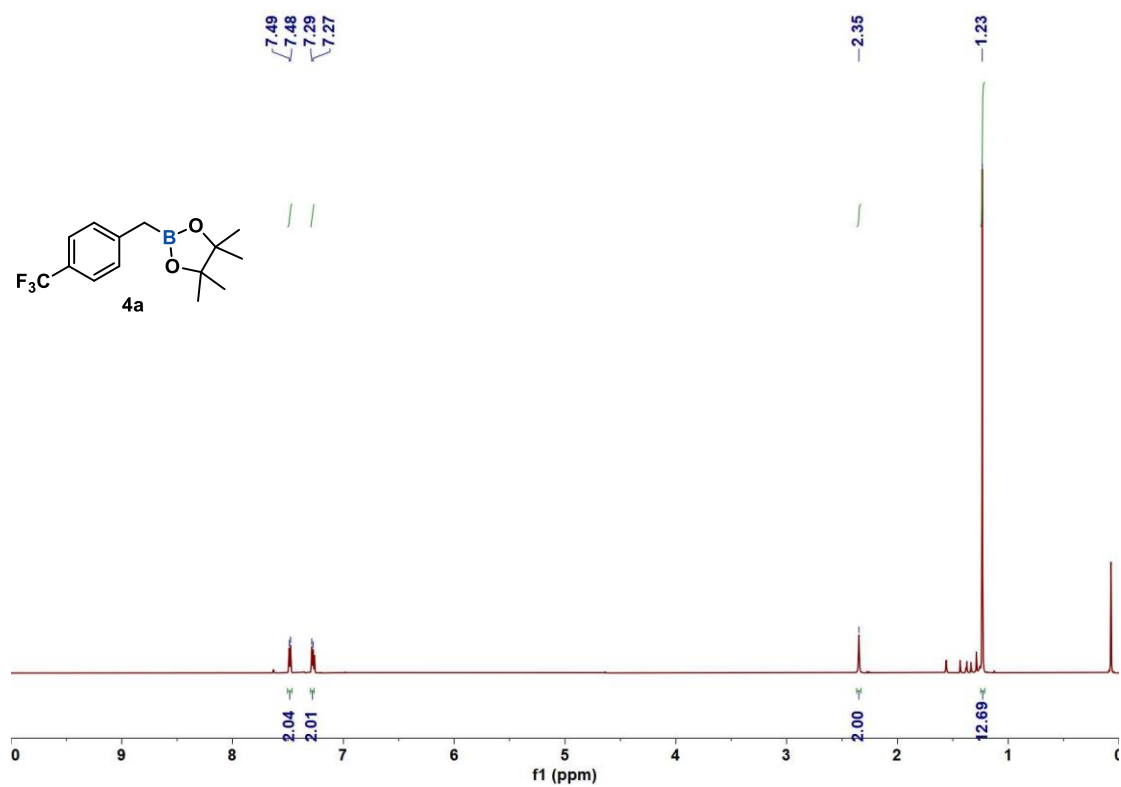

**Figure S96.** <sup>1</sup>H NMR spectrum of **4a** in CDCl<sub>3</sub> at 298K

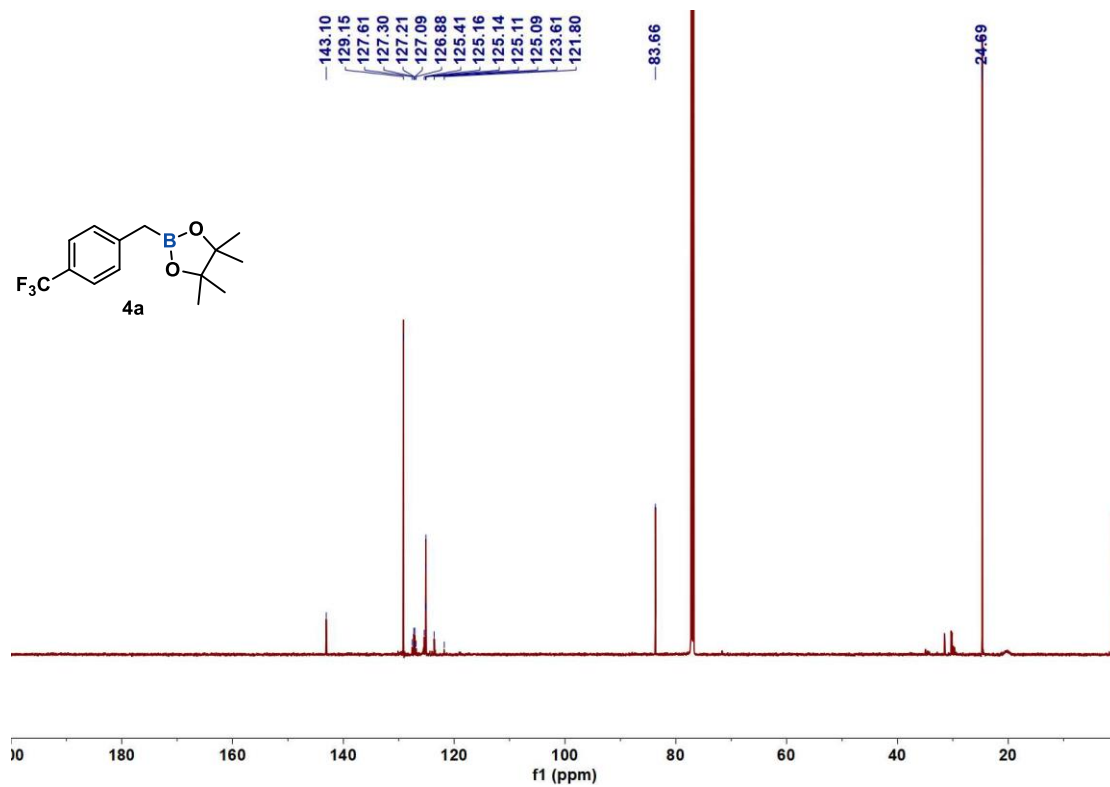

**Figure S97.**  $^{13}\text{C}\{^1\text{H}\}$  NMR spectrum of **4a** in  $\text{CDCl}_3$  at 298K

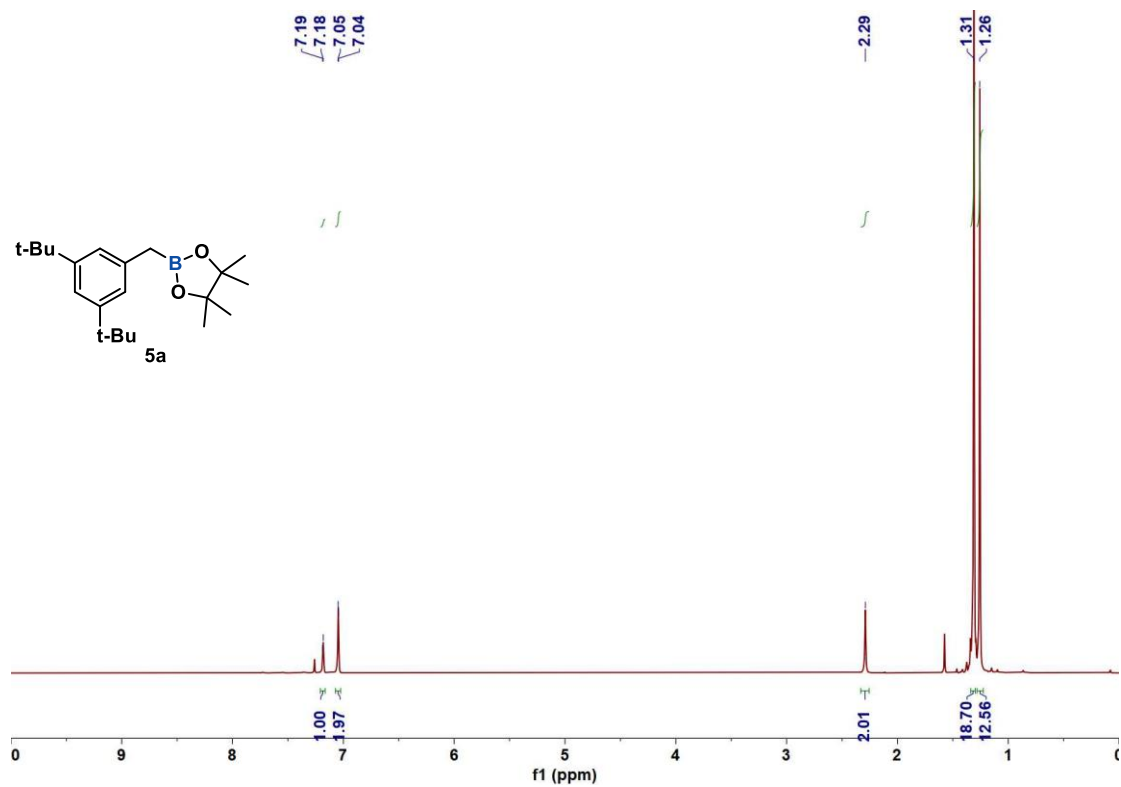

**Figure S98.** <sup>1</sup>H NMR spectrum of **5a** in CDCl<sub>3</sub> at 298K

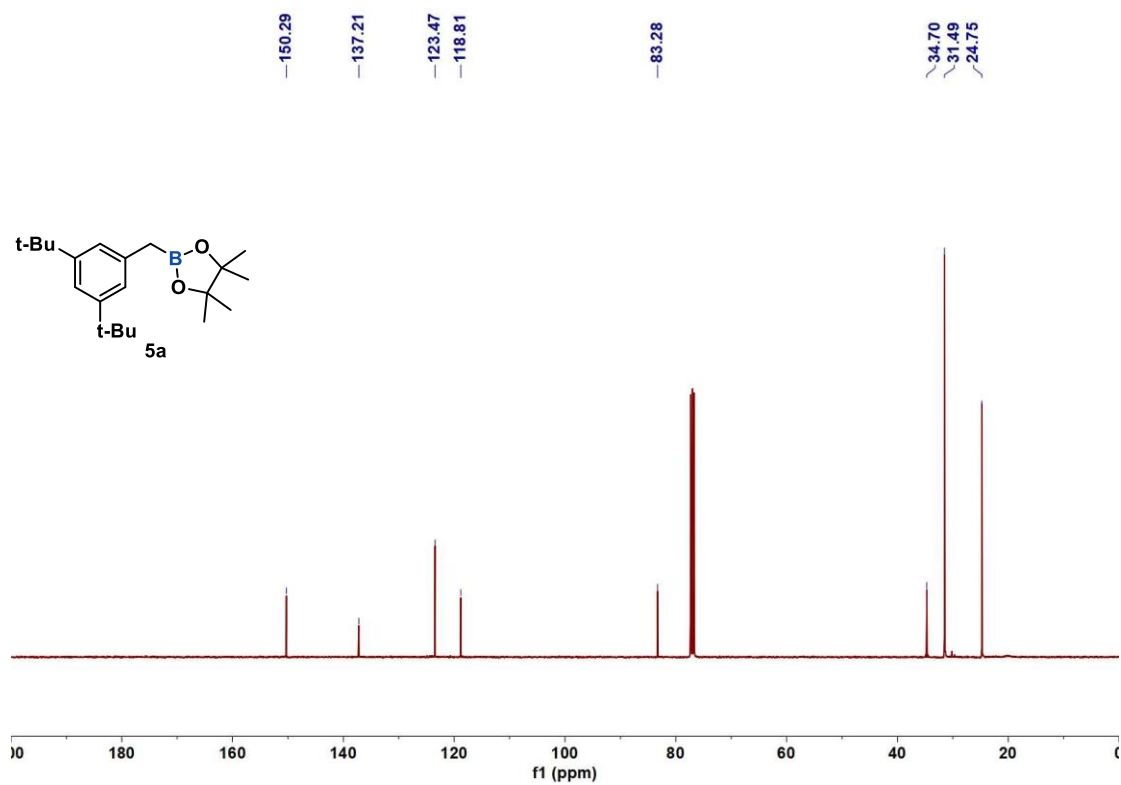

**Figure S99.**  $^{13}\text{C}\{^1\text{H}\}$  NMR spectrum of **5a** in  $\text{CDCl}_3$  at 298K

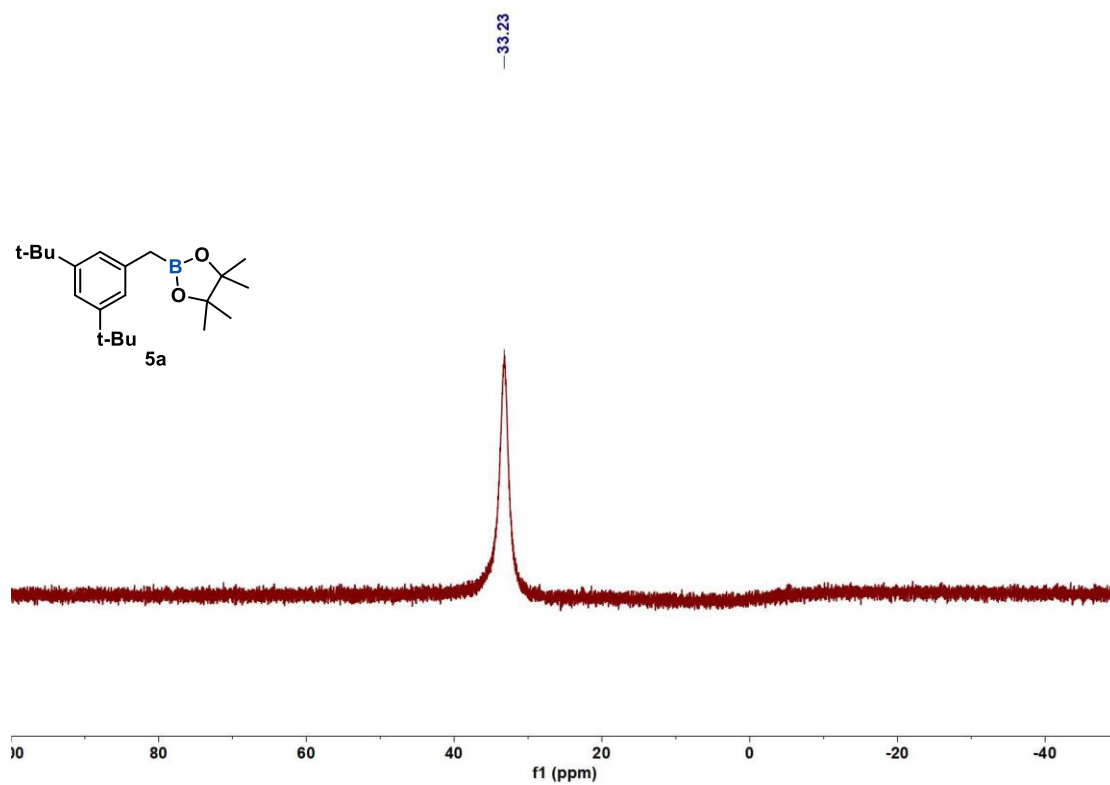

**Figure S100.**  $^{11}\text{B}\{^1\text{H}\}$  NMR spectrum of **5a** in  $\text{CDCl}_3$  at 298K

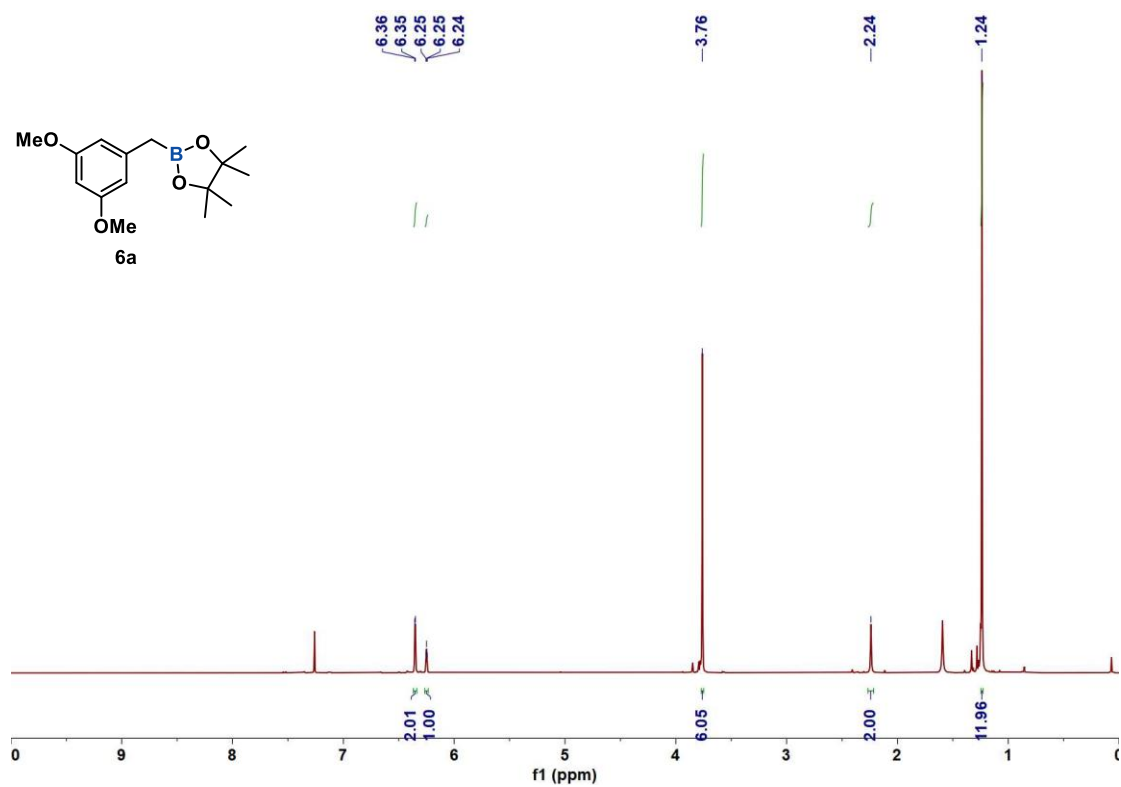

**Figure S101.**  $^1\text{H}$  NMR spectrum of **6a** in  $\text{CDCl}_3$  at 298K

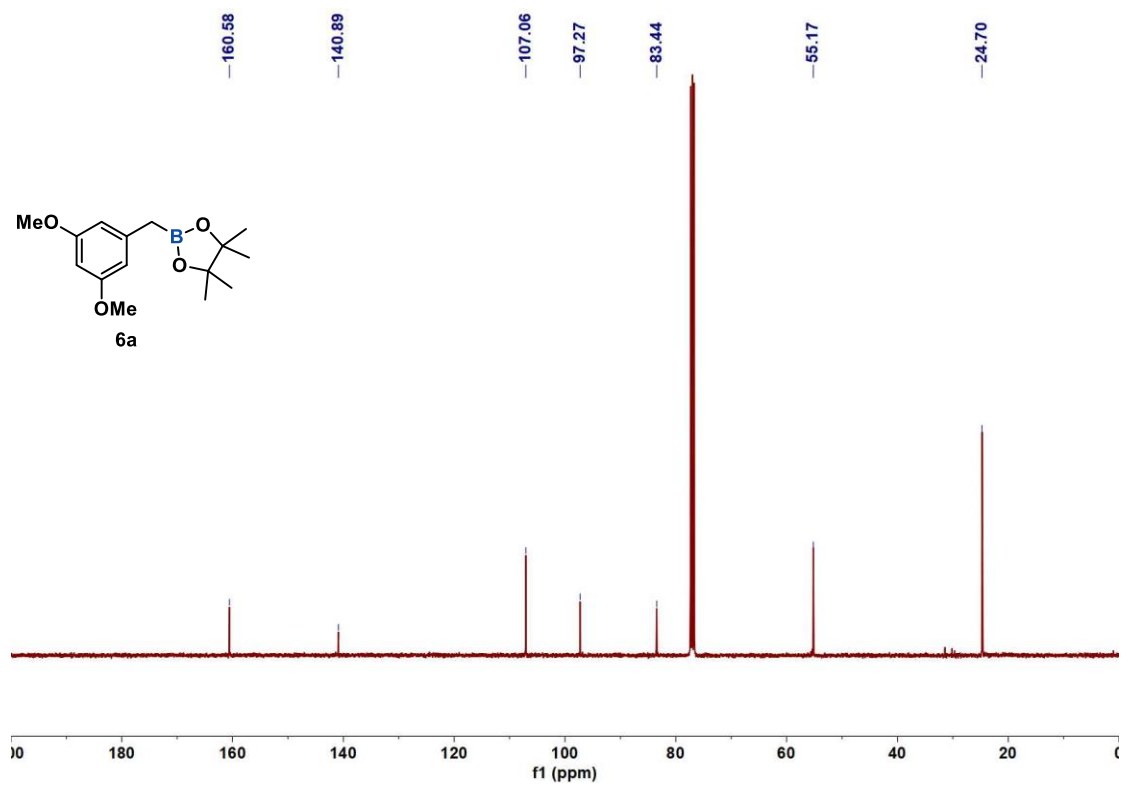

**Figure S102.**  $^{13}\text{C}\{^1\text{H}\}$  NMR spectrum of **6a** in  $\text{CDCl}_3$  at 298K

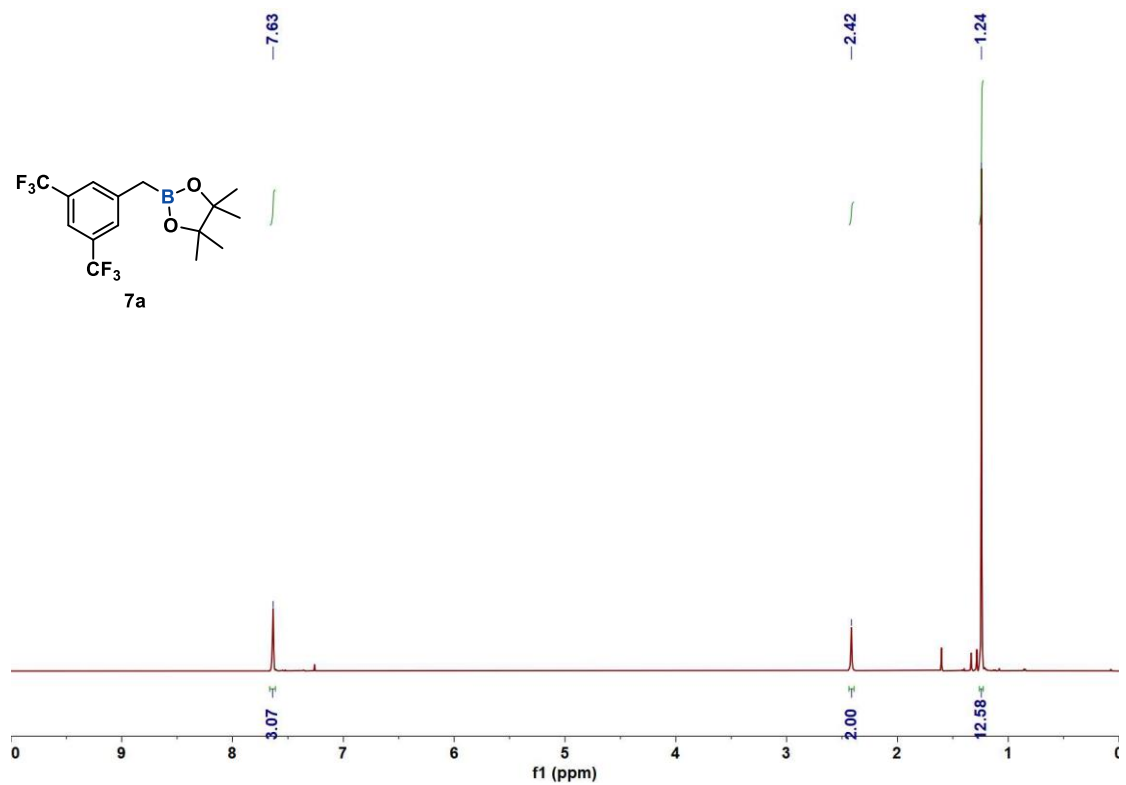

**Figure S103.** <sup>1</sup>H NMR spectrum of **7a** in CDCl<sub>3</sub> at 298K



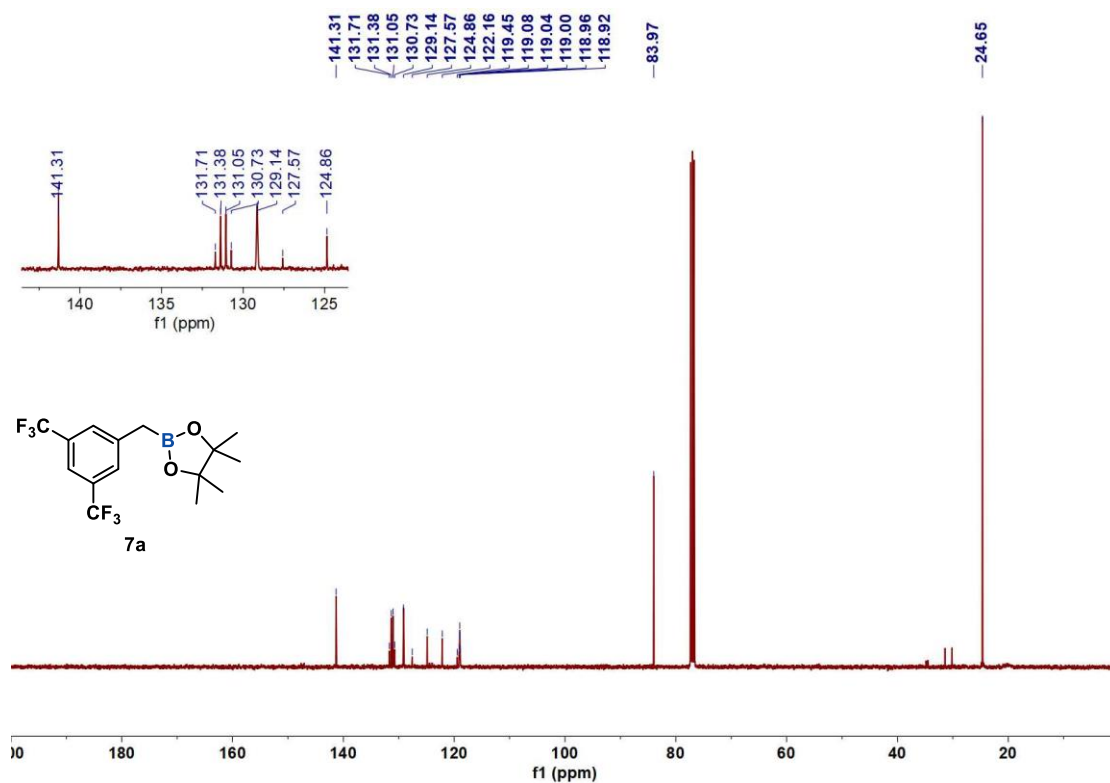

**Figure S104.**  $^{13}\text{C}\{^1\text{H}\}$  NMR spectrum of **7a** in  $\text{CDCl}_3$  at 298K

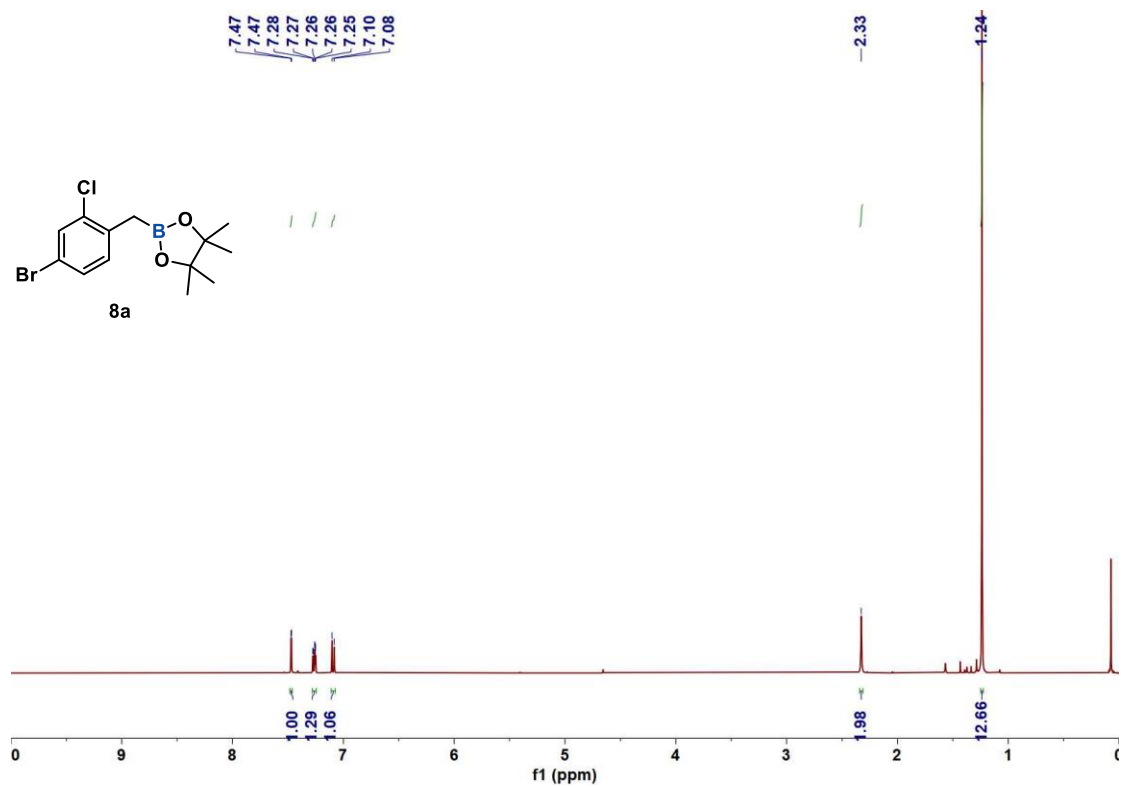

**Figure S105.**  $^1\text{H}$  NMR spectrum of **8a** in  $\text{CDCl}_3$  at 298K

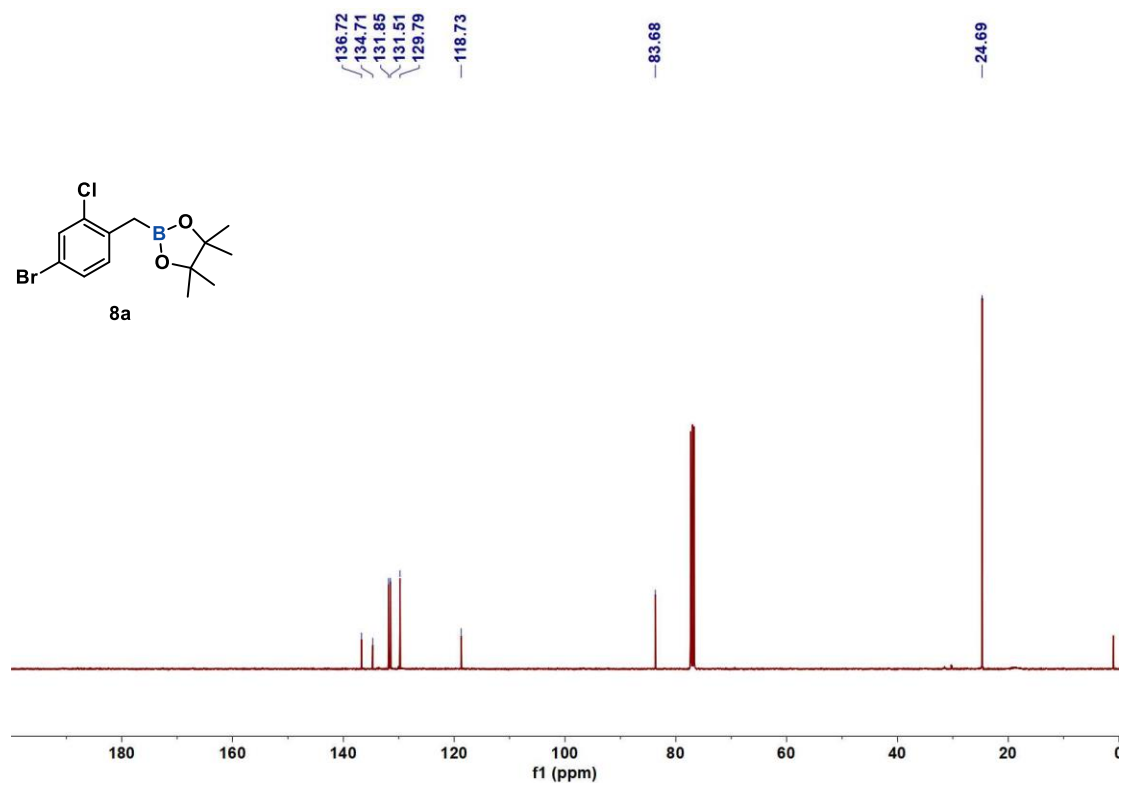

**Figure S106.**  $^{13}\text{C}\{^1\text{H}\}$  NMR spectrum of **8a** in  $\text{CDCl}_3$  at 298K

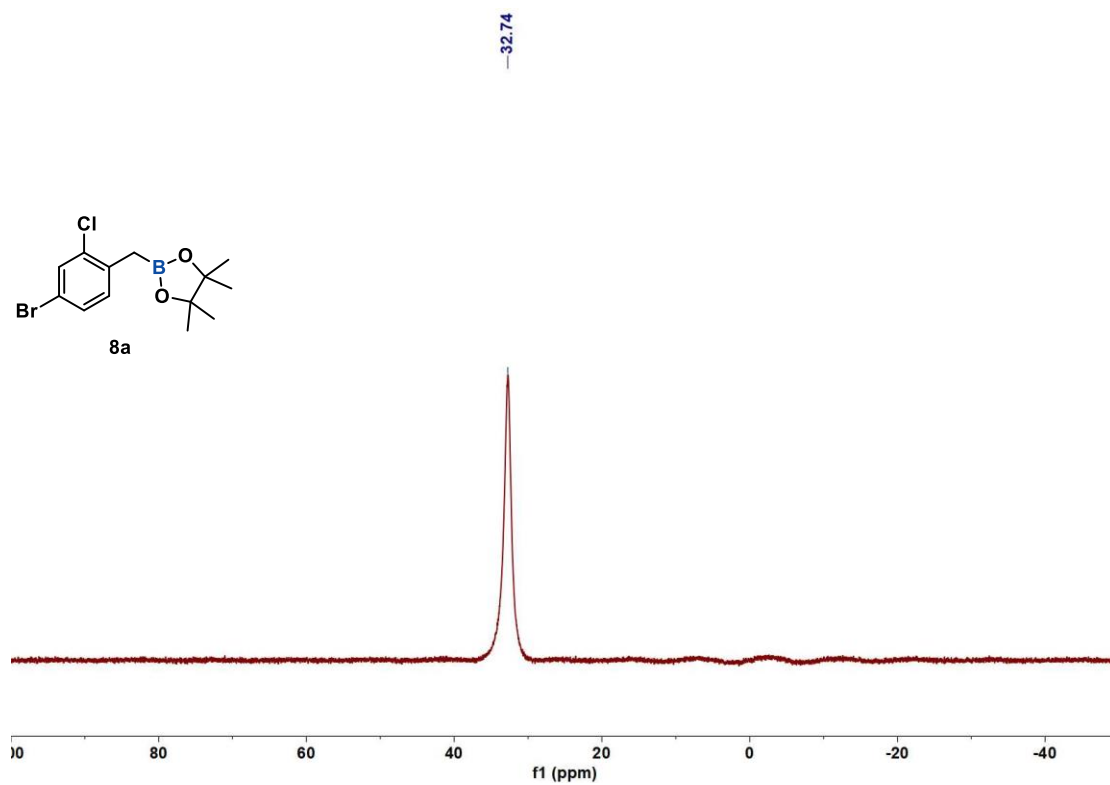

**Figure S107.**  $^{11}\text{B}\{^1\text{H}\}$  NMR spectrum of **8a** in  $\text{CDCl}_3$  at 298K

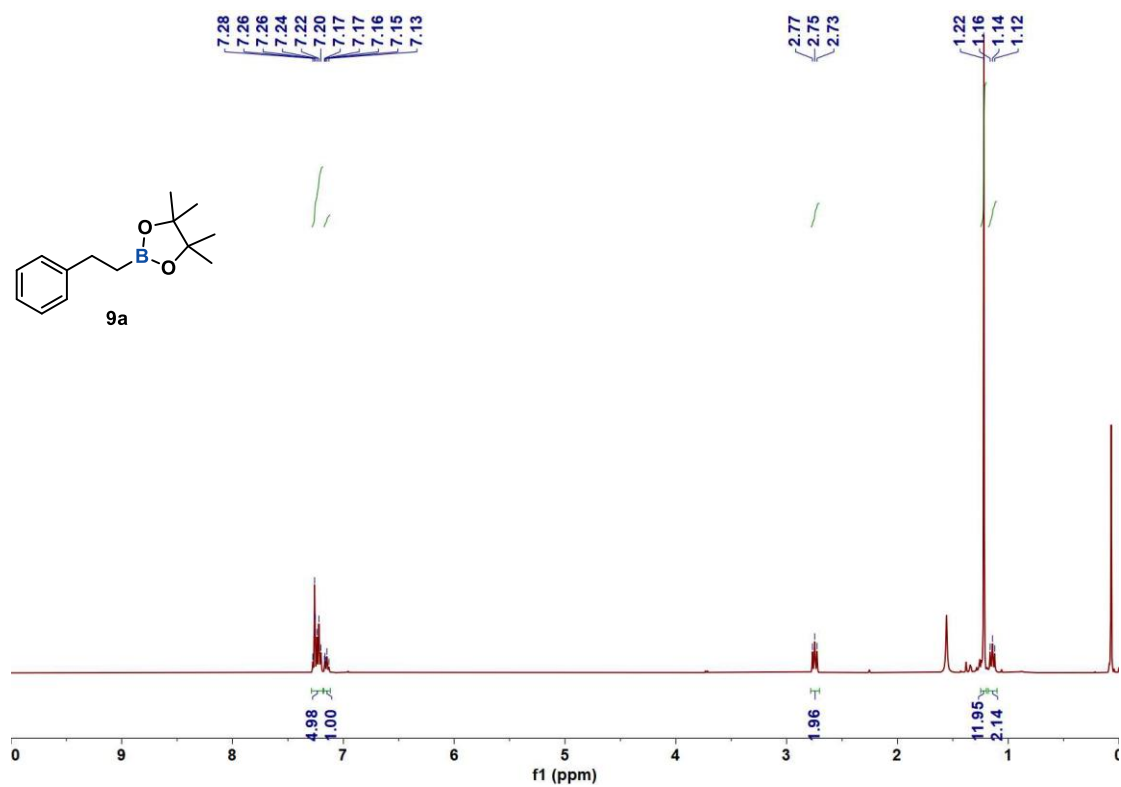

**Figure S108.** <sup>1</sup>H NMR spectrum of **9a** in CDCl<sub>3</sub> at 298K

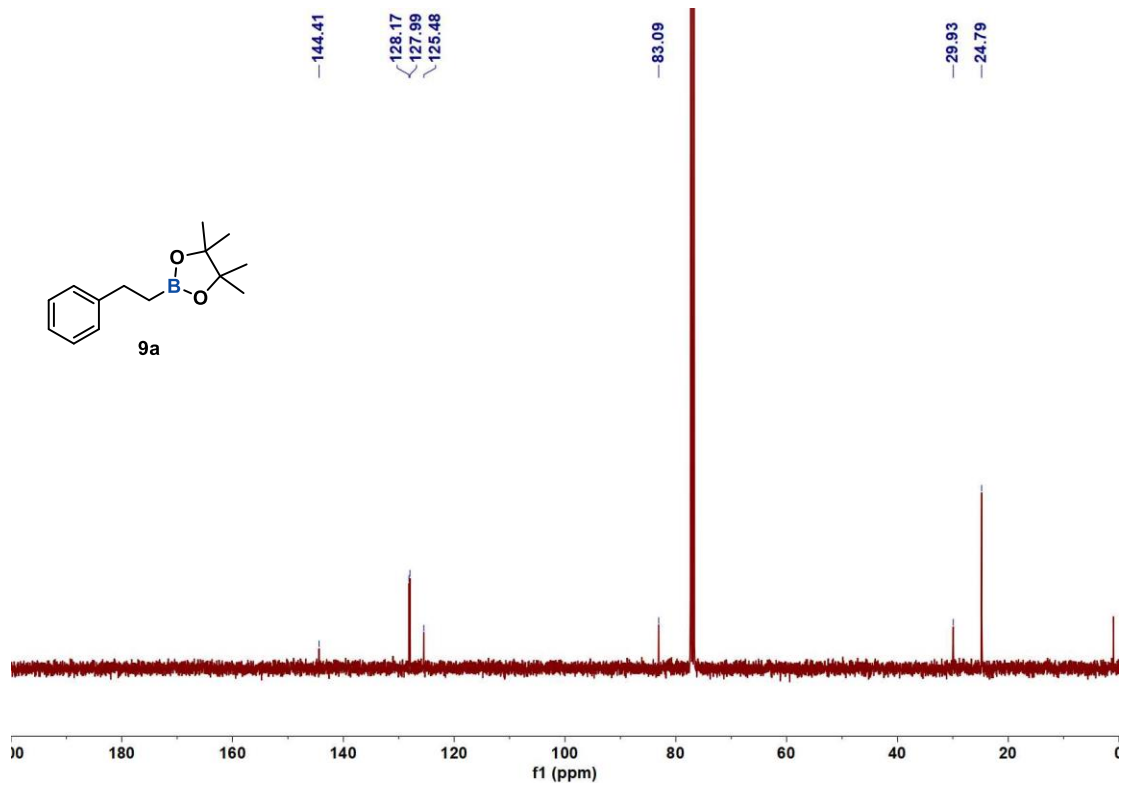

**Figure S109.**  $^{13}\text{C}\{^1\text{H}\}$  NMR spectrum of **9a** in  $\text{CDCl}_3$  at 298K

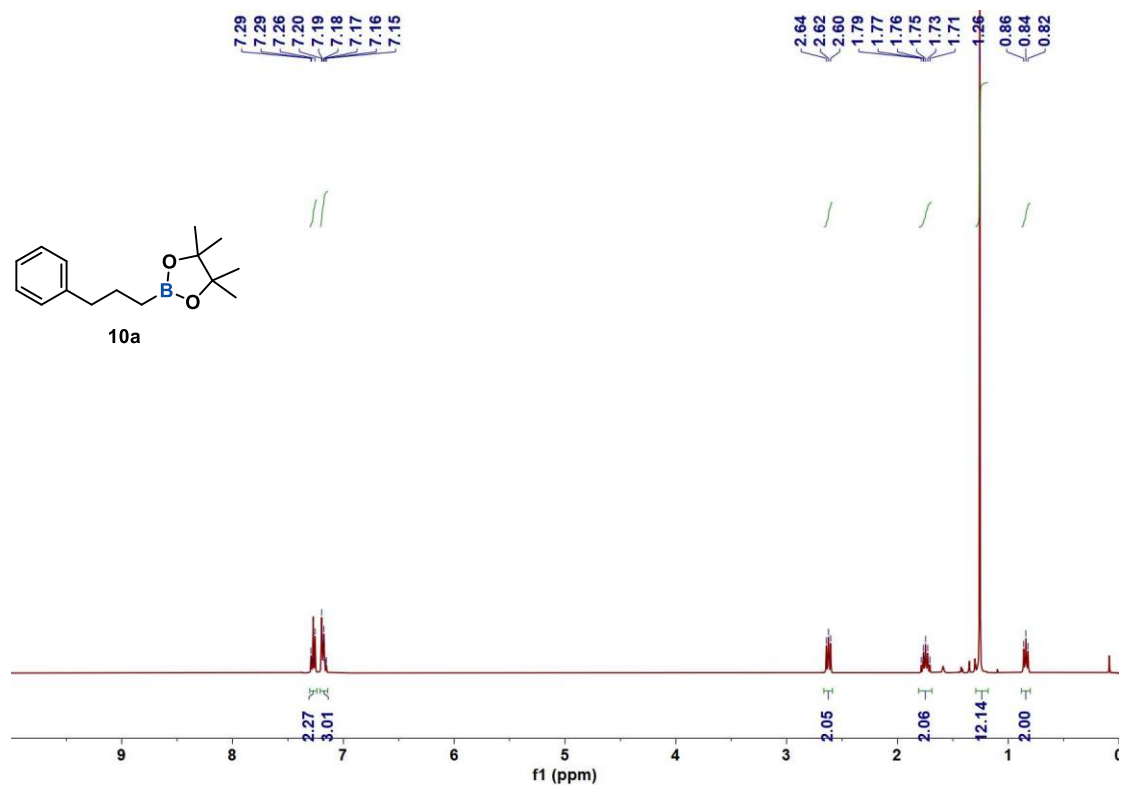

**Figure S110.** <sup>1</sup>H NMR spectrum of **10a** in CDCl<sub>3</sub> at 298K

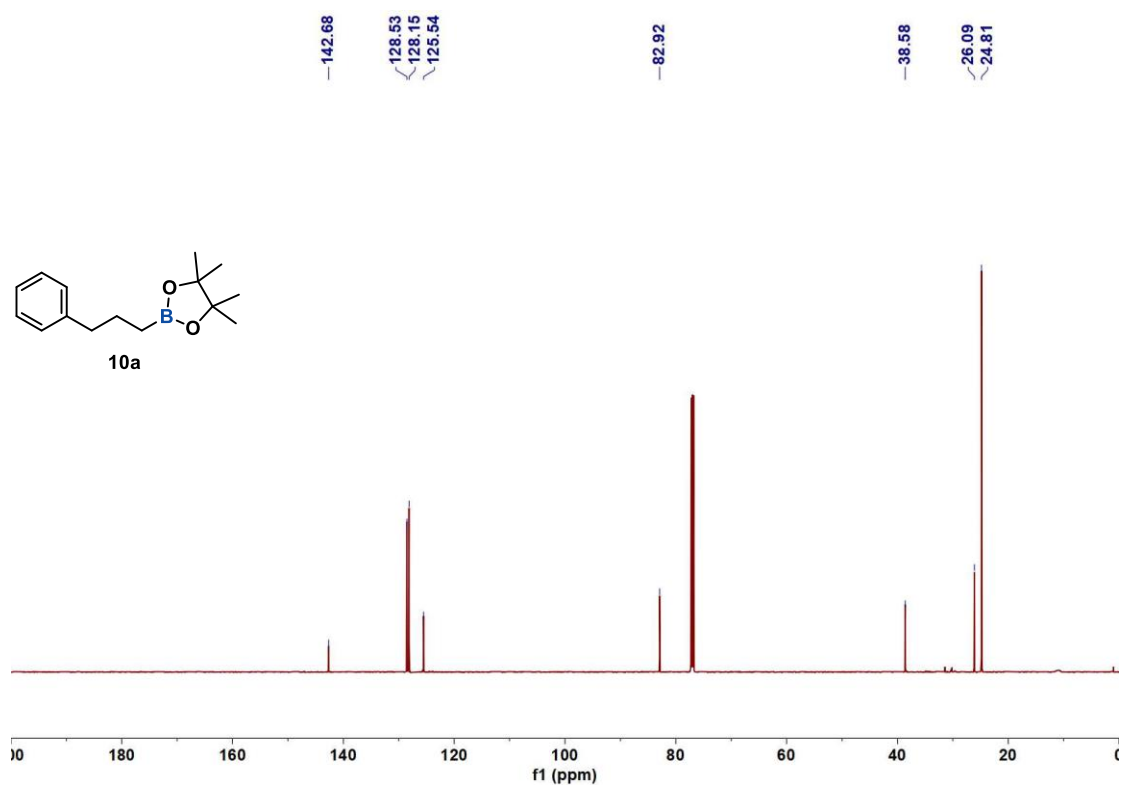

**Figure S111.**  $^{13}\text{C}\{^1\text{H}\}$  NMR spectrum of **10a** in  $\text{CDCl}_3$  at 298K



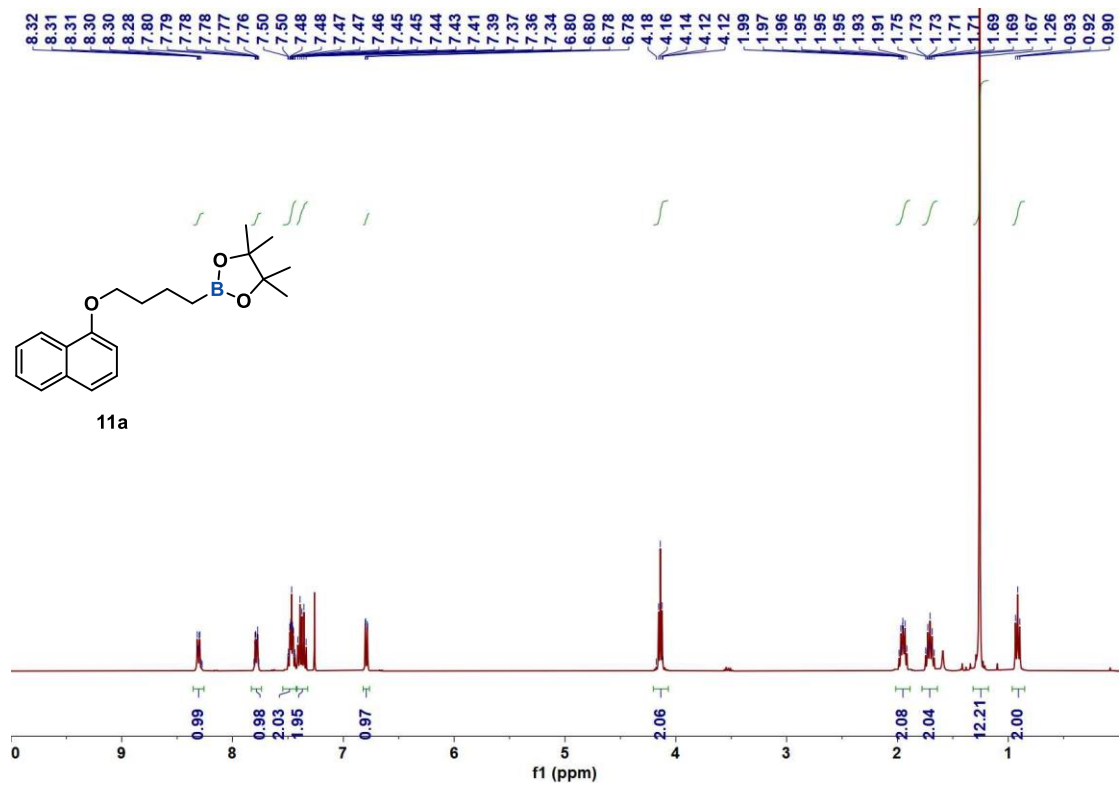

Figure S112.  $^1\text{H}$  NMR spectrum of 11a in  $\text{CDCl}_3$  at 298K

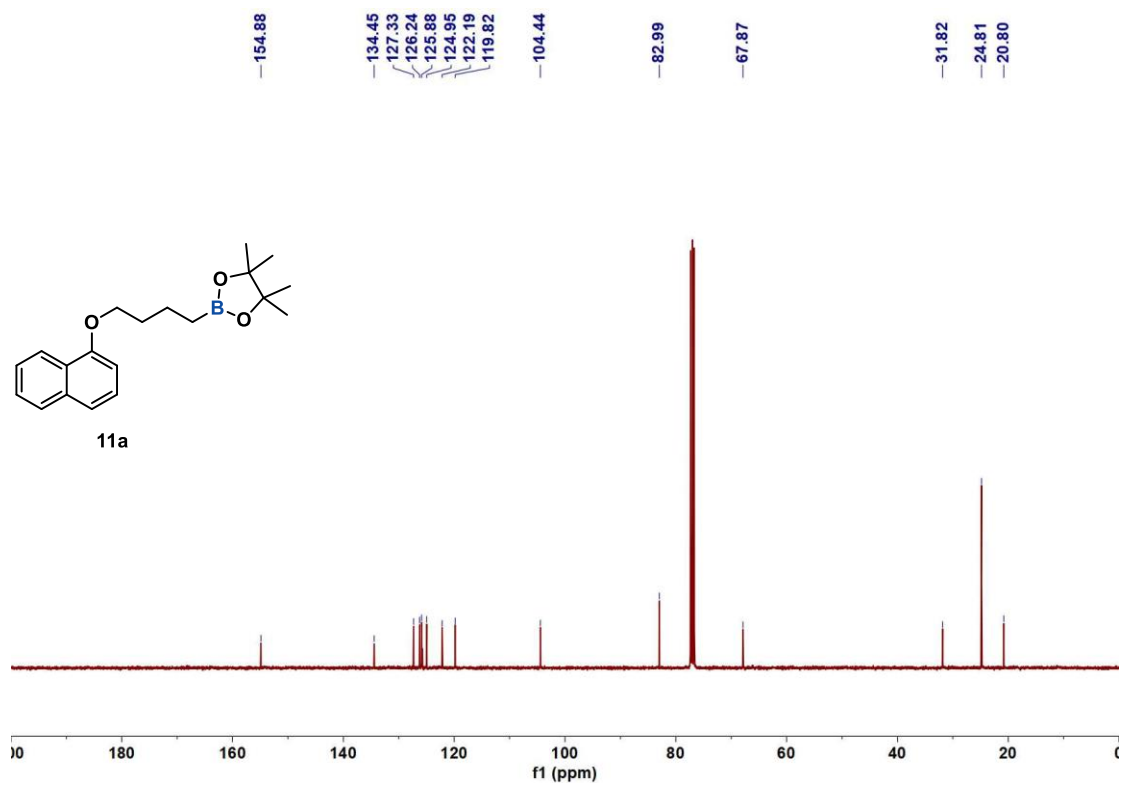

**Figure S113.**  $^{13}\text{C}\{^1\text{H}\}$  NMR spectrum of **11a** in  $\text{CDCl}_3$  at 298K

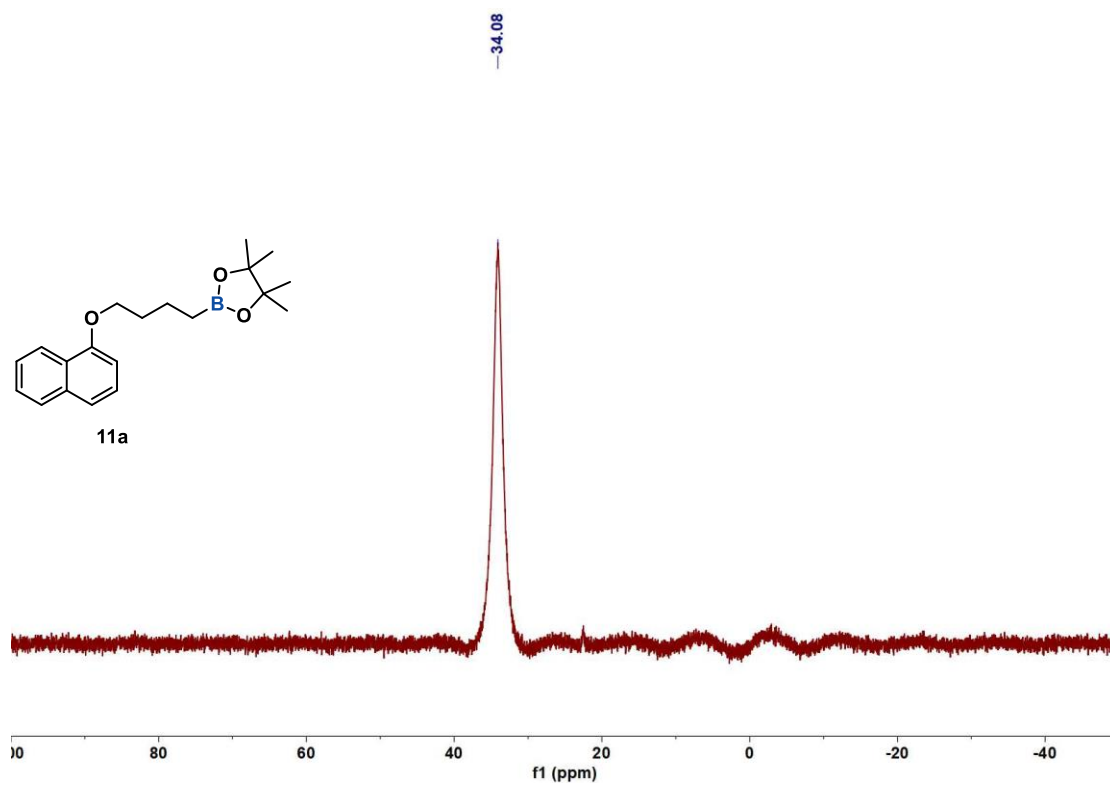

**Figure S114.**  $^{11}\text{B}\{^1\text{H}\}$  NMR spectrum of **11a** in  $\text{CDCl}_3$  at 298K

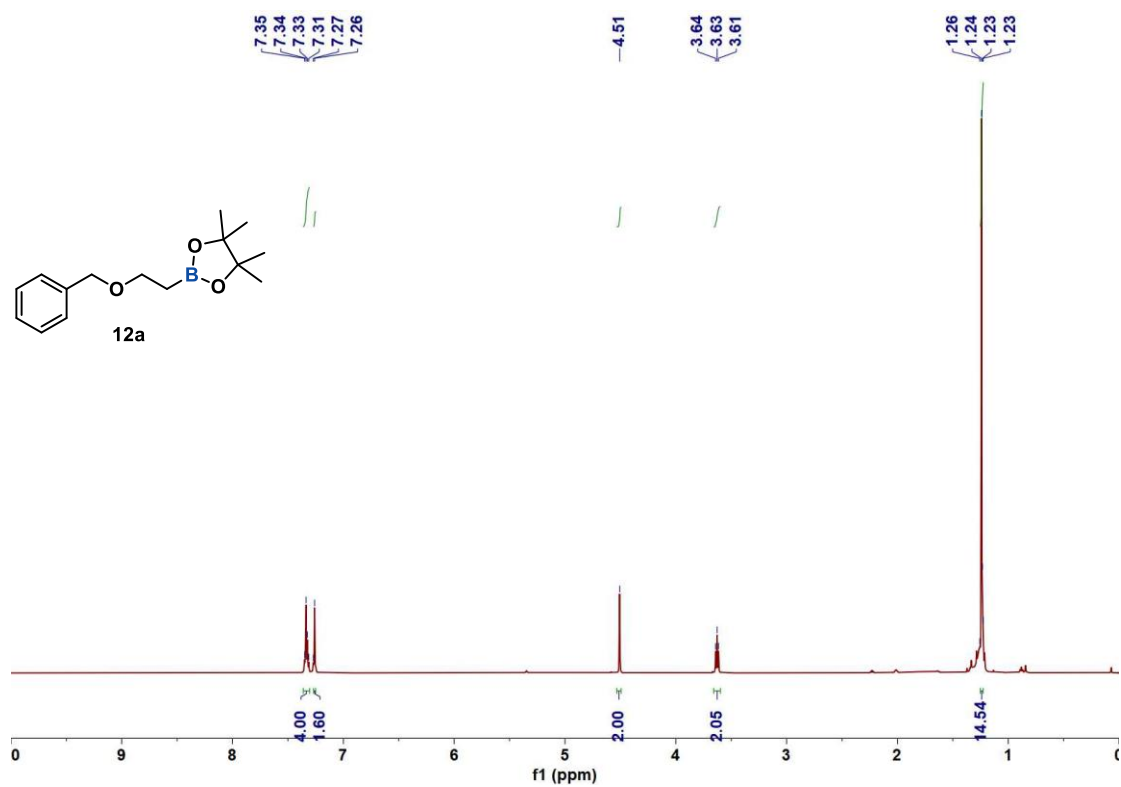

**Figure S115.**  $^1\text{H}$  NMR spectrum of **12a** in  $\text{CDCl}_3$  at 298K

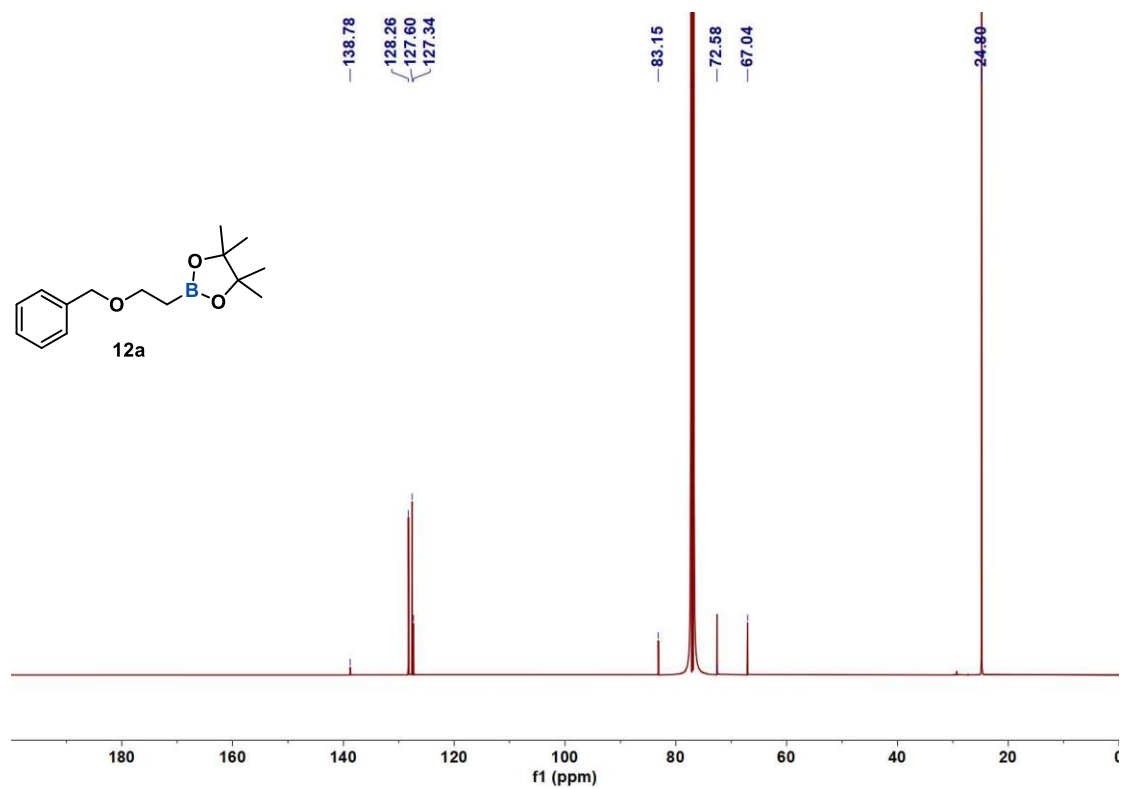

**Figure S116.**  $^{13}\text{C}\{^1\text{H}\}$  NMR spectrum of **12a** in  $\text{CDCl}_3$  at 298K

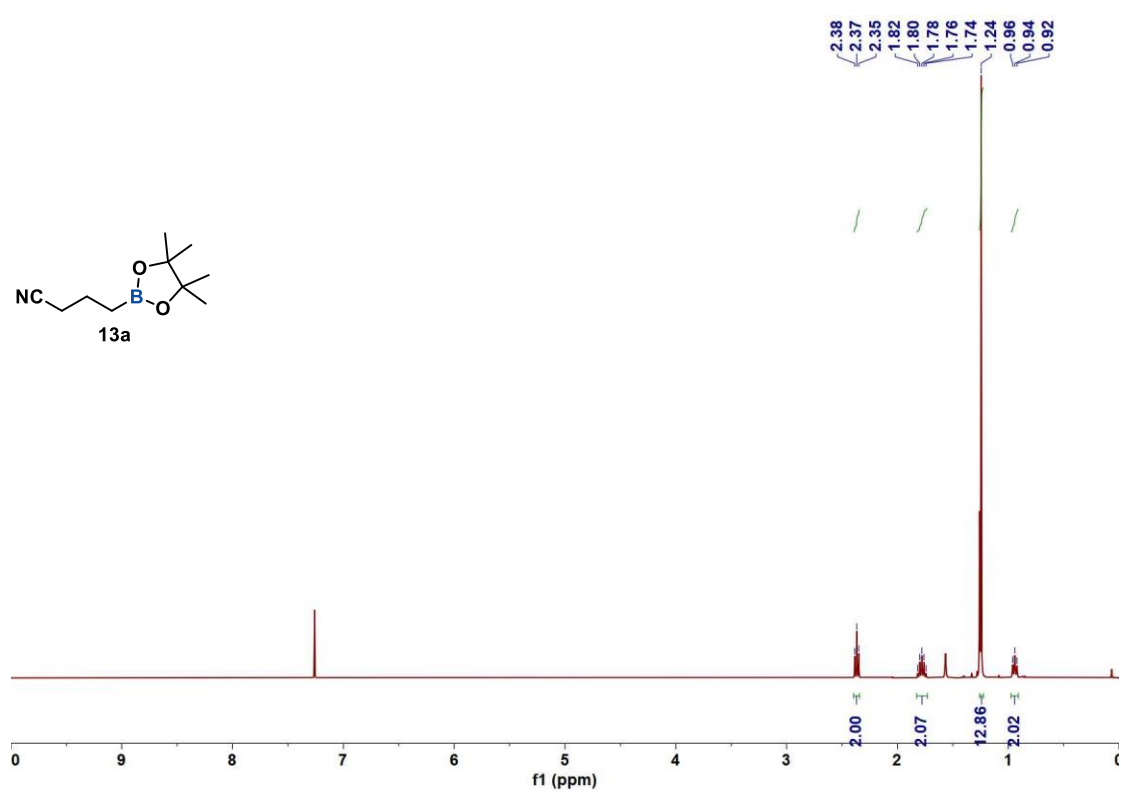

**Figure S117.** <sup>1</sup>H NMR spectrum of **13a** in CDCl<sub>3</sub> at 298K

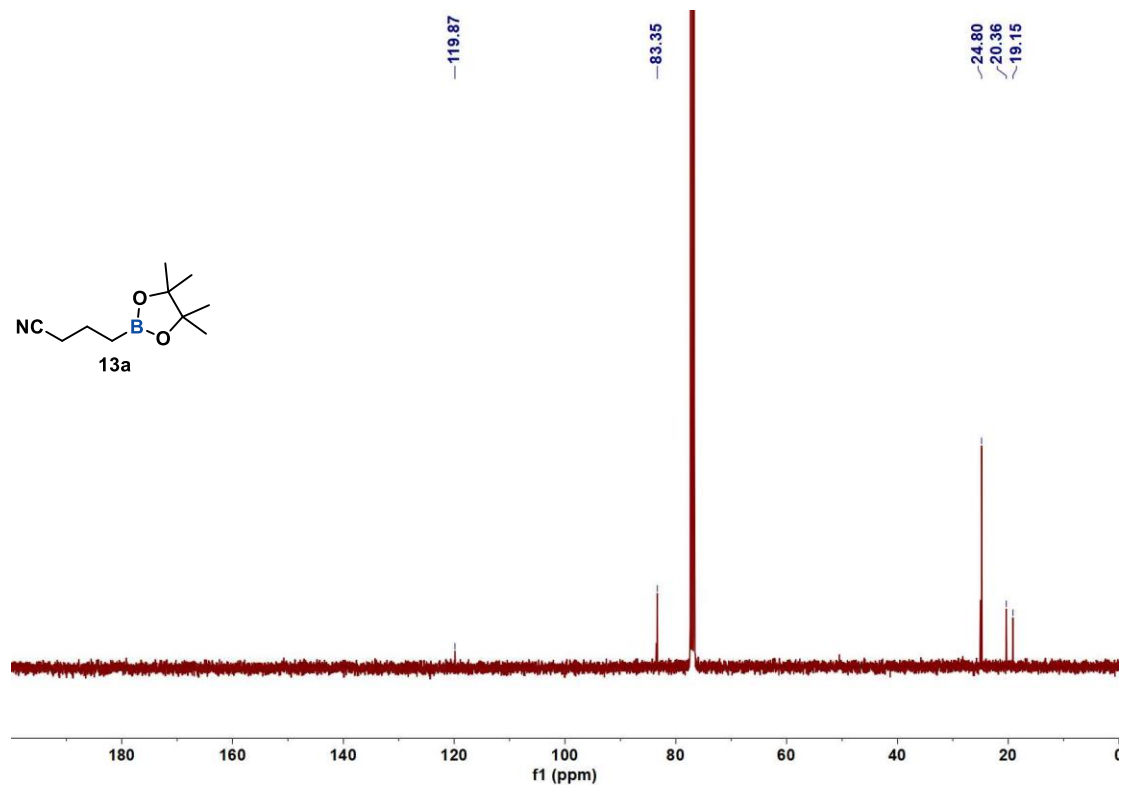

**Figure S118.**  $^{13}\text{C}\{^1\text{H}\}$  NMR spectrum of **13a** in  $\text{CDCl}_3$  at 298K

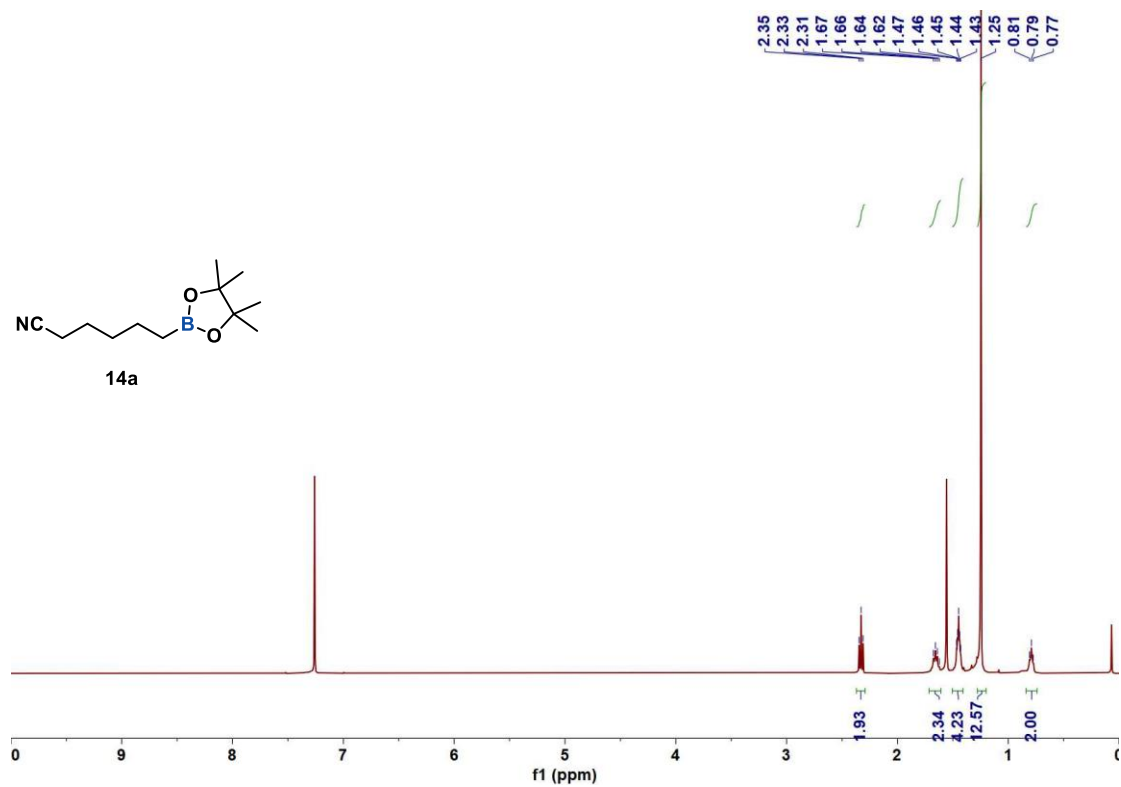

**Figure S119.**  $^1\text{H}$  NMR spectrum of **14a** in  $\text{CDCl}_3$  at 298K



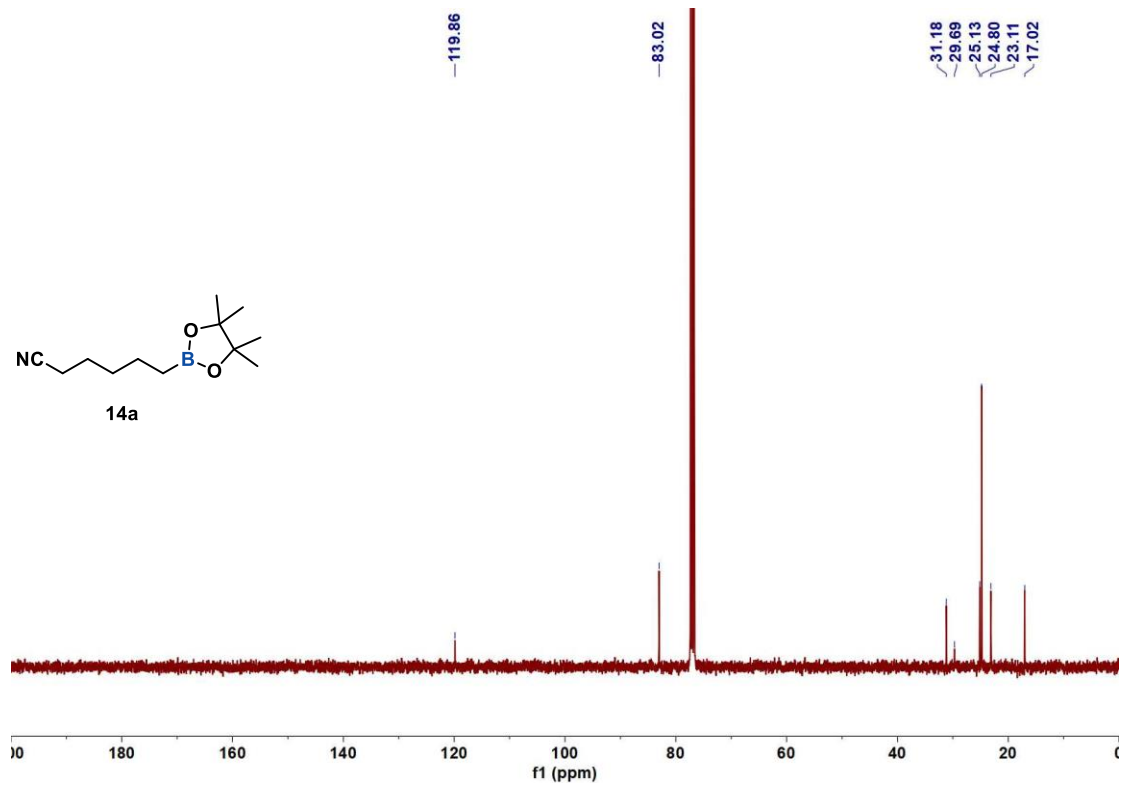

**Figure S120.**  $^{13}\text{C}\{^1\text{H}\}$  NMR spectrum of **14a** in  $\text{CDCl}_3$  at 298K

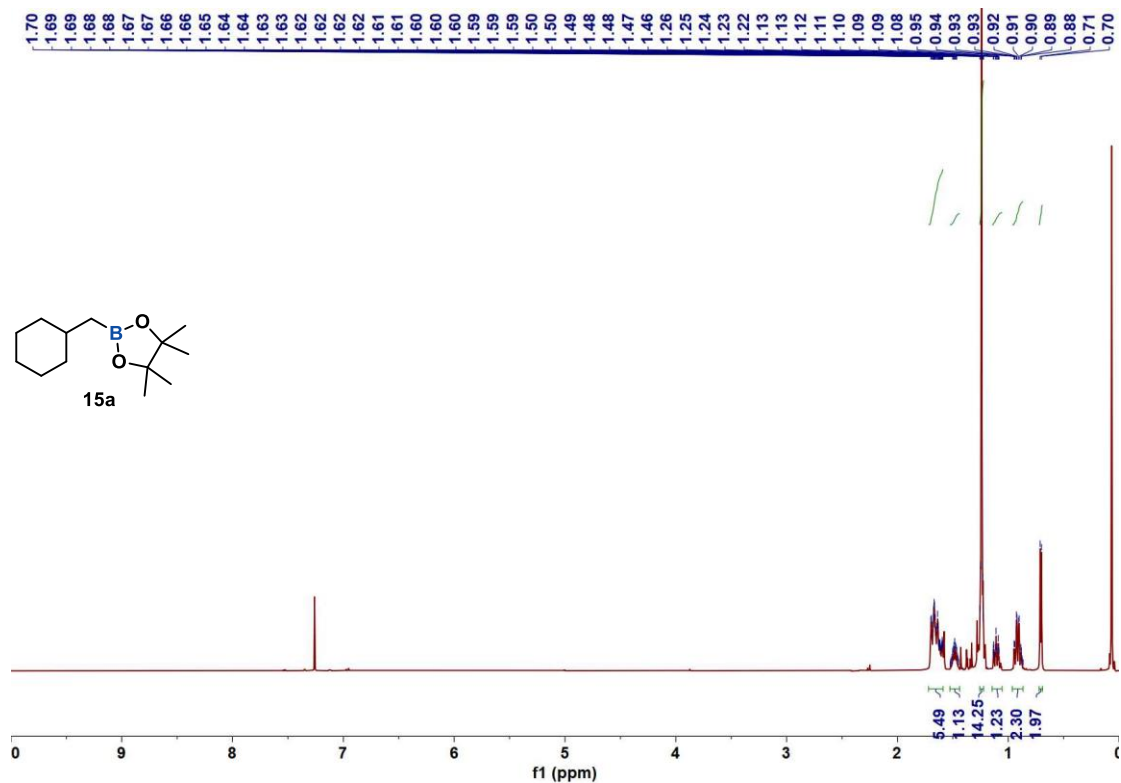

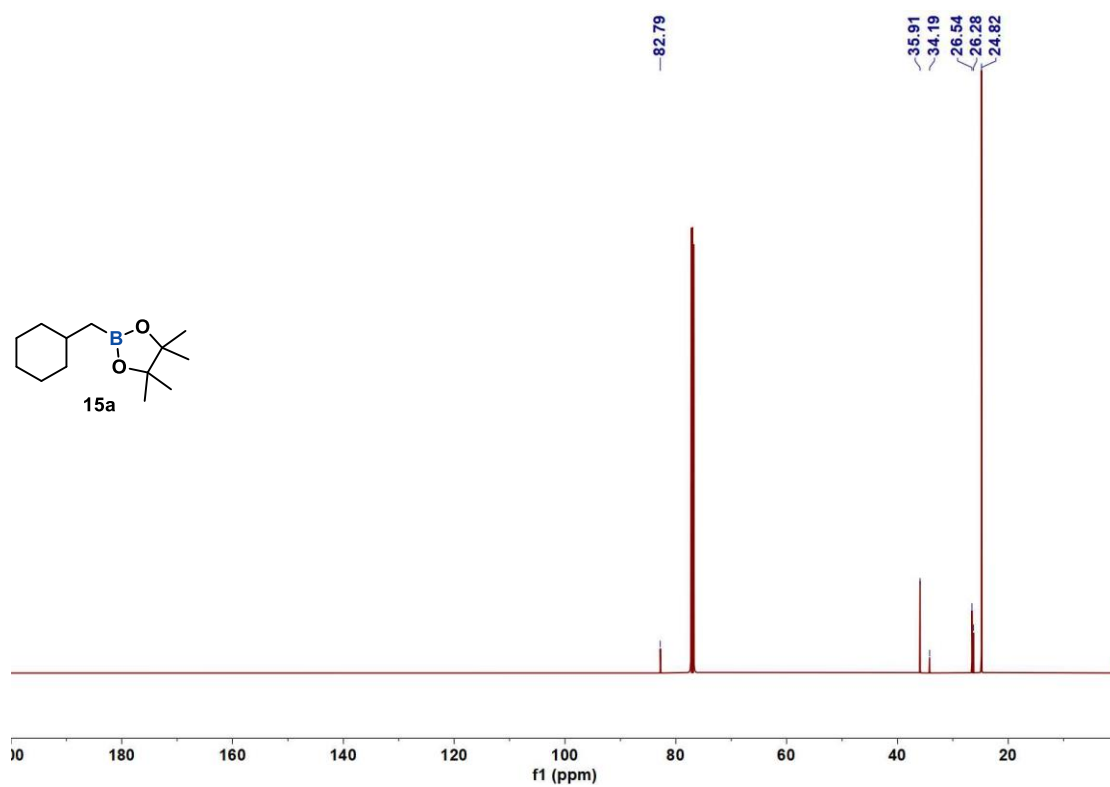

**Figure S122.**  $^{13}\text{C}\{^1\text{H}\}$  NMR spectrum of **15a** in  $\text{CDCl}_3$  at 298K

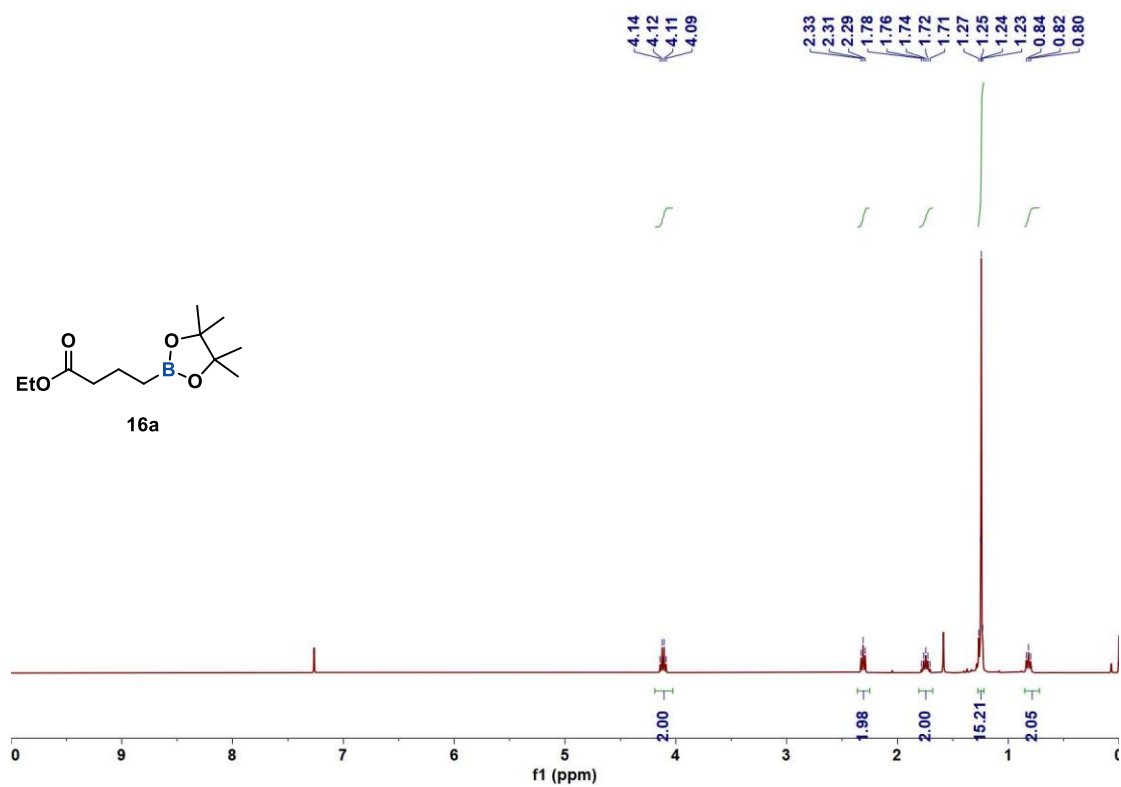

**Figure S123.**  $^1\text{H}$  NMR spectrum of **16a** in  $\text{CDCl}_3$  at 298K

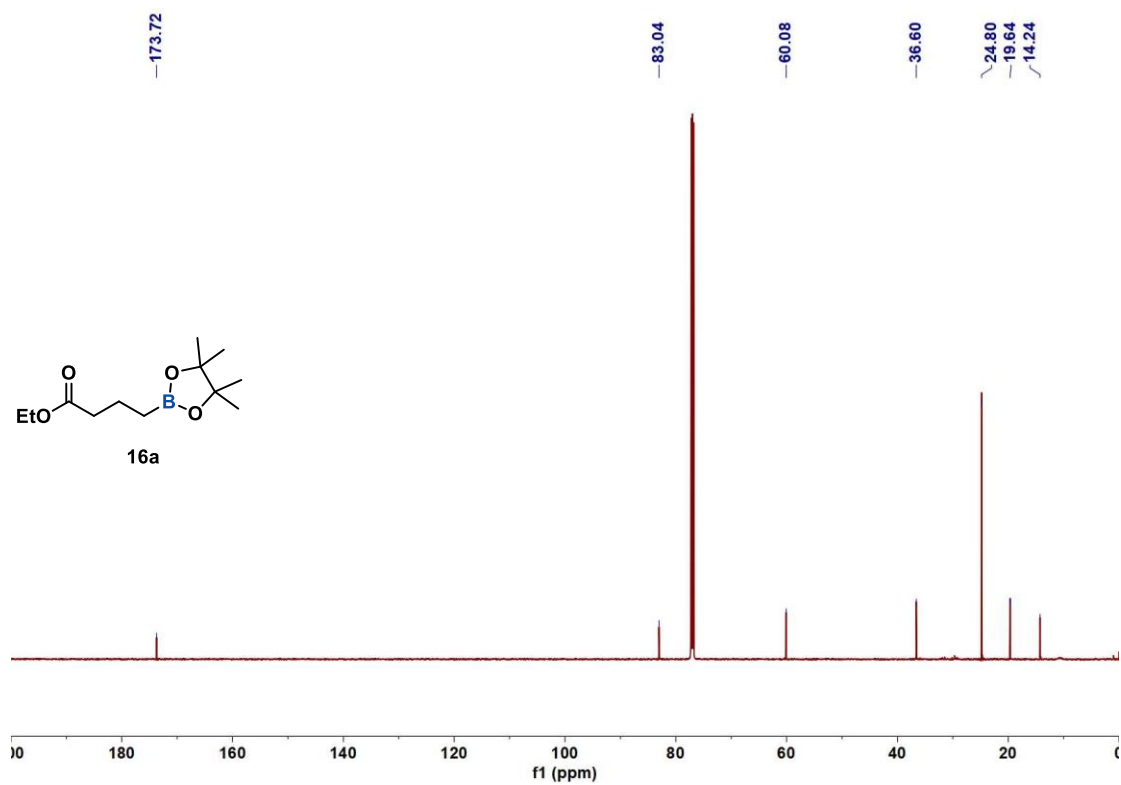

**Figure S124.**  $^{13}\text{C}\{^1\text{H}\}$  NMR spectrum of **16a** in  $\text{CDCl}_3$  at 298K

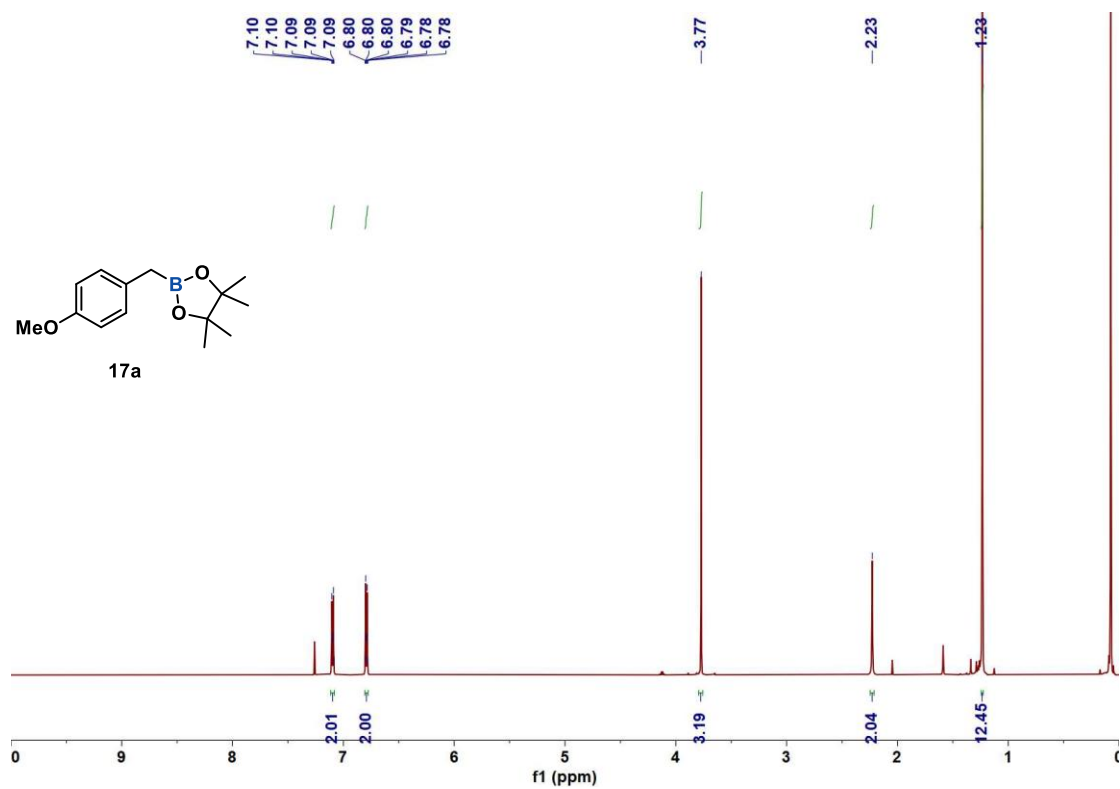

Figure S125. <sup>1</sup>H NMR spectrum of 17a in CDCl<sub>3</sub> at 298K

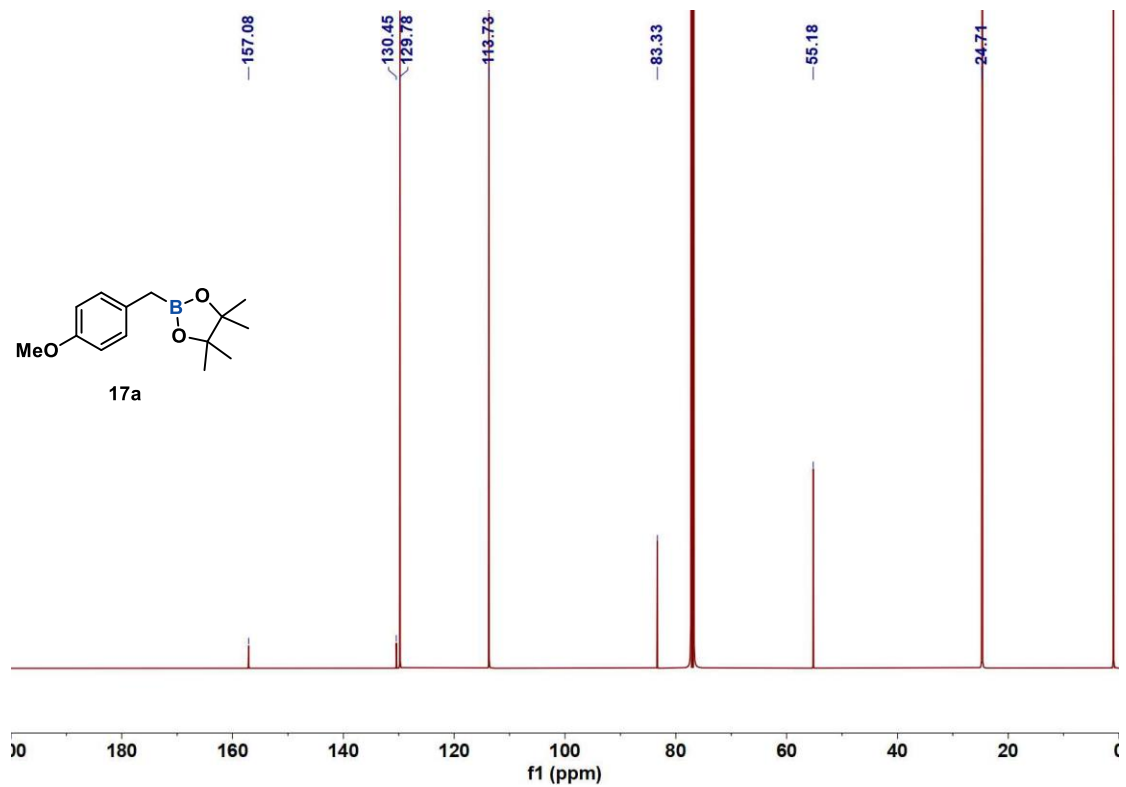

**Figure S126.**  $^{13}\text{C}\{^1\text{H}\}$  NMR spectrum of **17a** in  $\text{CDCl}_3$  at 298K

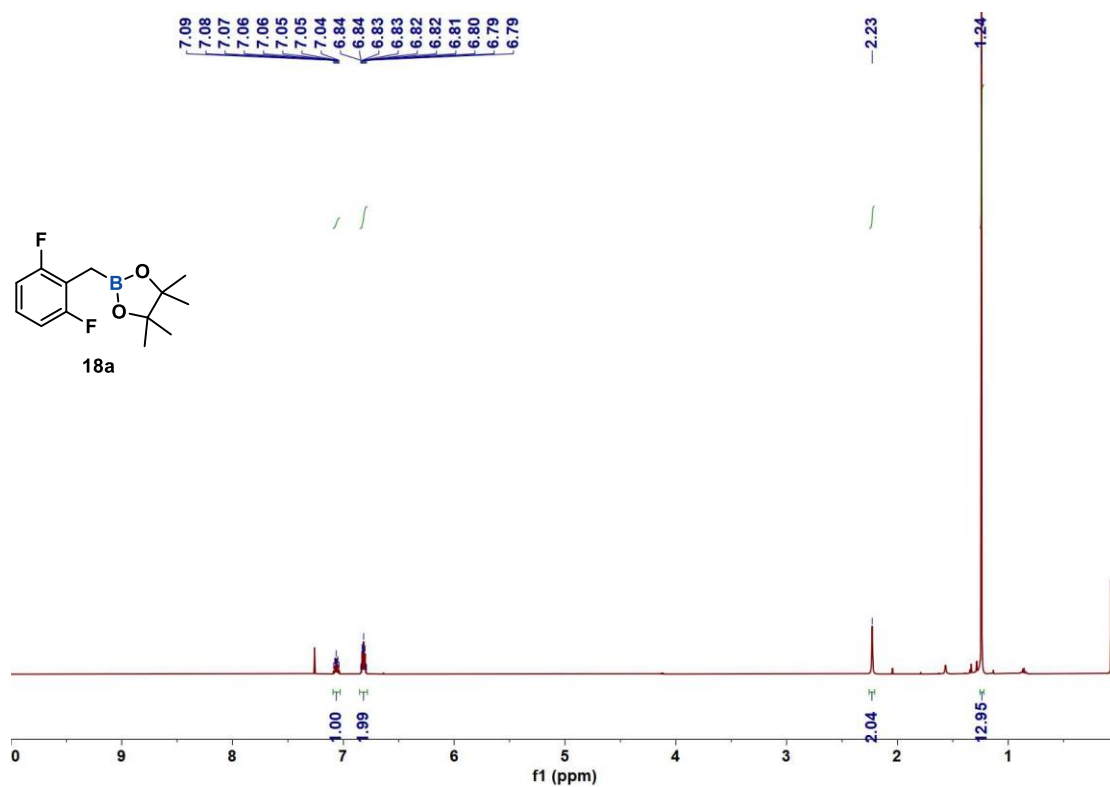

**Figure S127.** <sup>1</sup>H NMR spectrum of **18a** in CDCl<sub>3</sub> at 298K



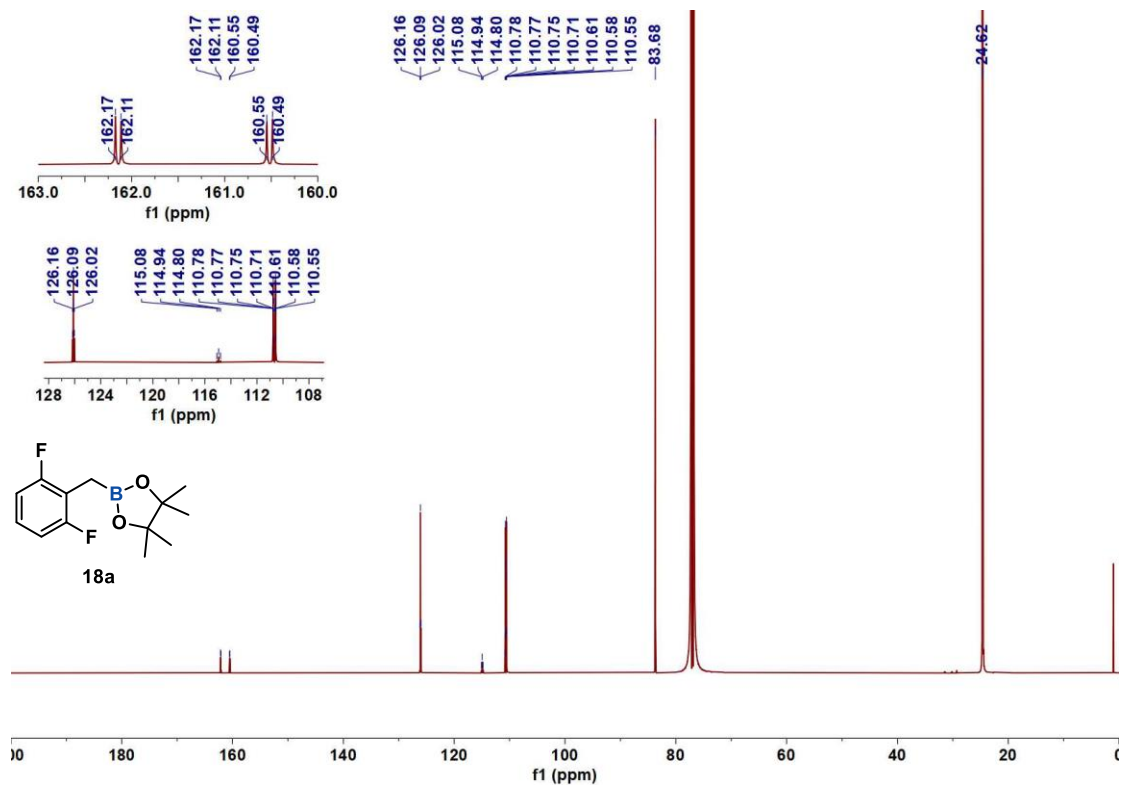

**Figure S128.**  $^{13}\text{C}\{^1\text{H}\}$  NMR spectrum of **18a** in  $\text{CDCl}_3$  at 298K

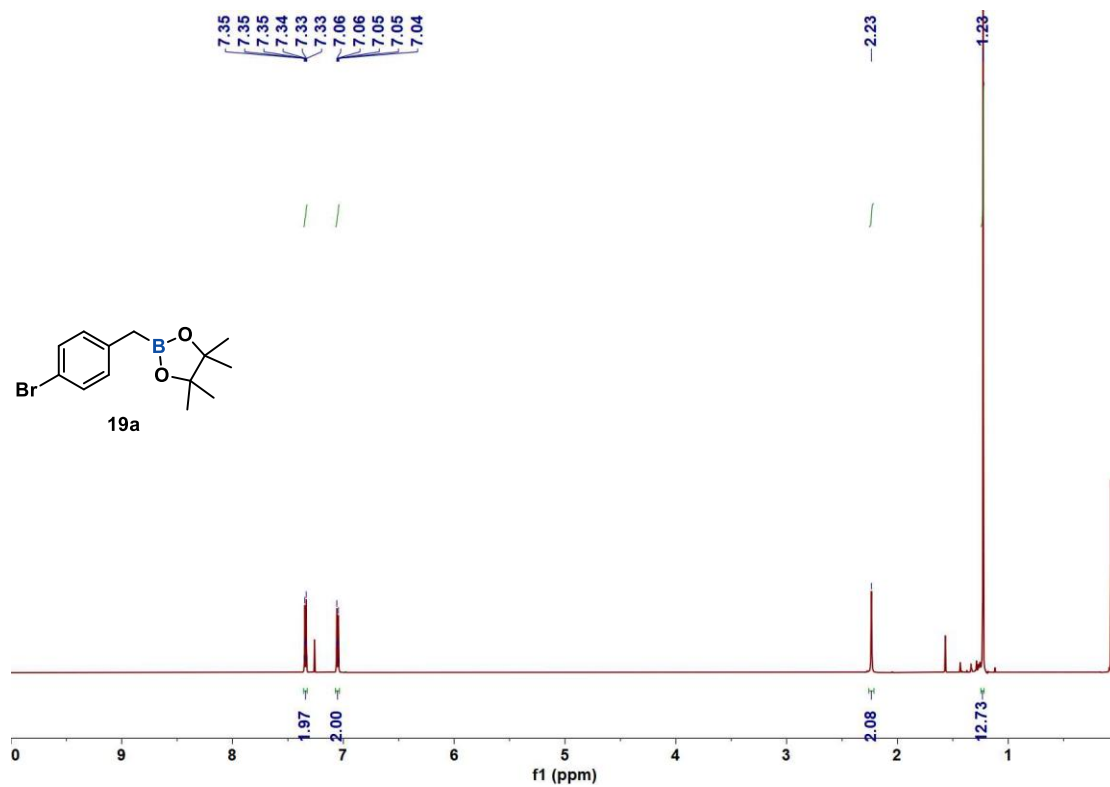

**Figure S129.** <sup>1</sup>H NMR spectrum of **19a** in CDCl<sub>3</sub> at 298K

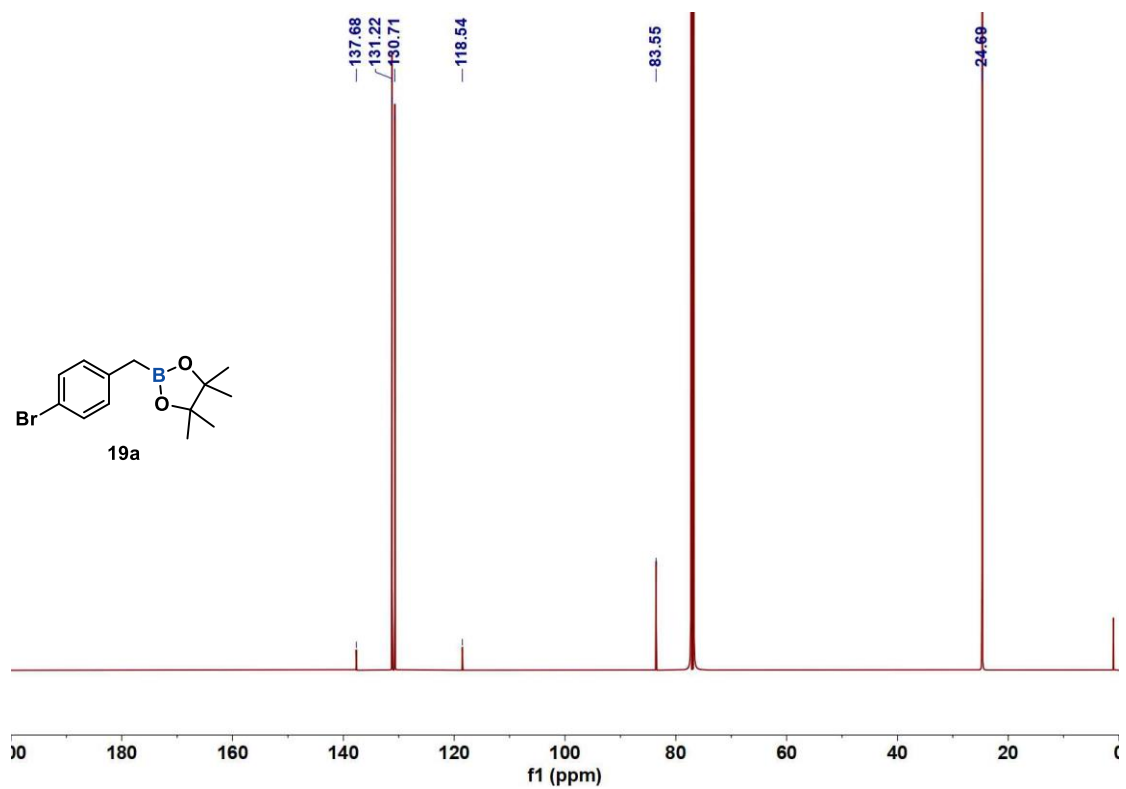

**Figure S130.**  $^{13}\text{C}\{^1\text{H}\}$  NMR spectrum of **19a** in  $\text{CDCl}_3$  at 298K

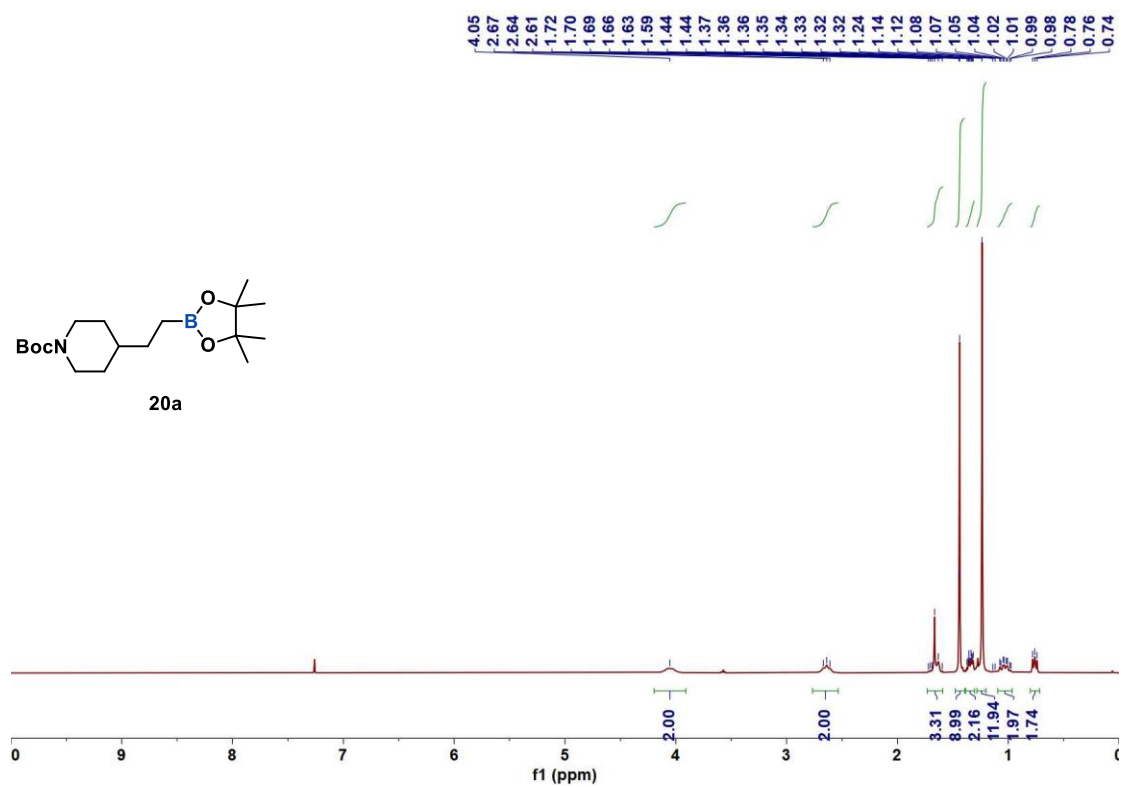

**Figure S131.** <sup>1</sup>H NMR spectrum of **20a** in CDCl<sub>3</sub> at 298K

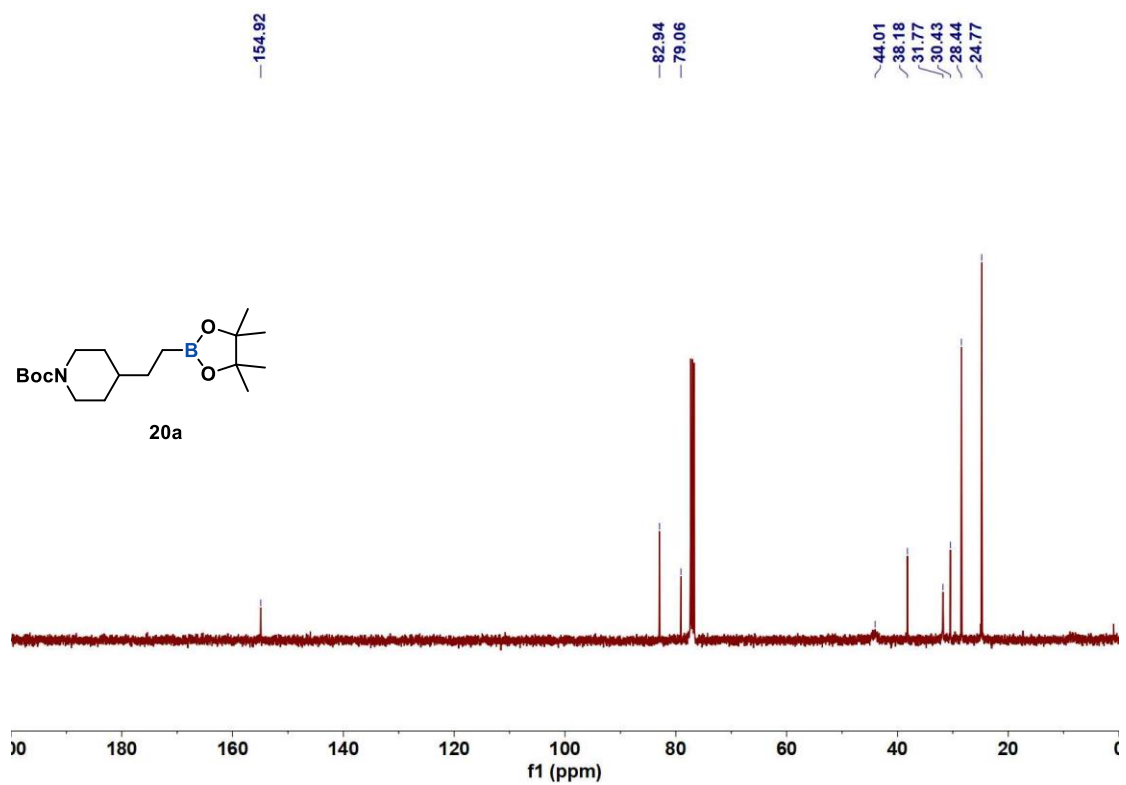

**Figure S132.**  $^{13}\text{C}\{^1\text{H}\}$  NMR spectrum of **20a** in  $\text{CDCl}_3$  at 298K

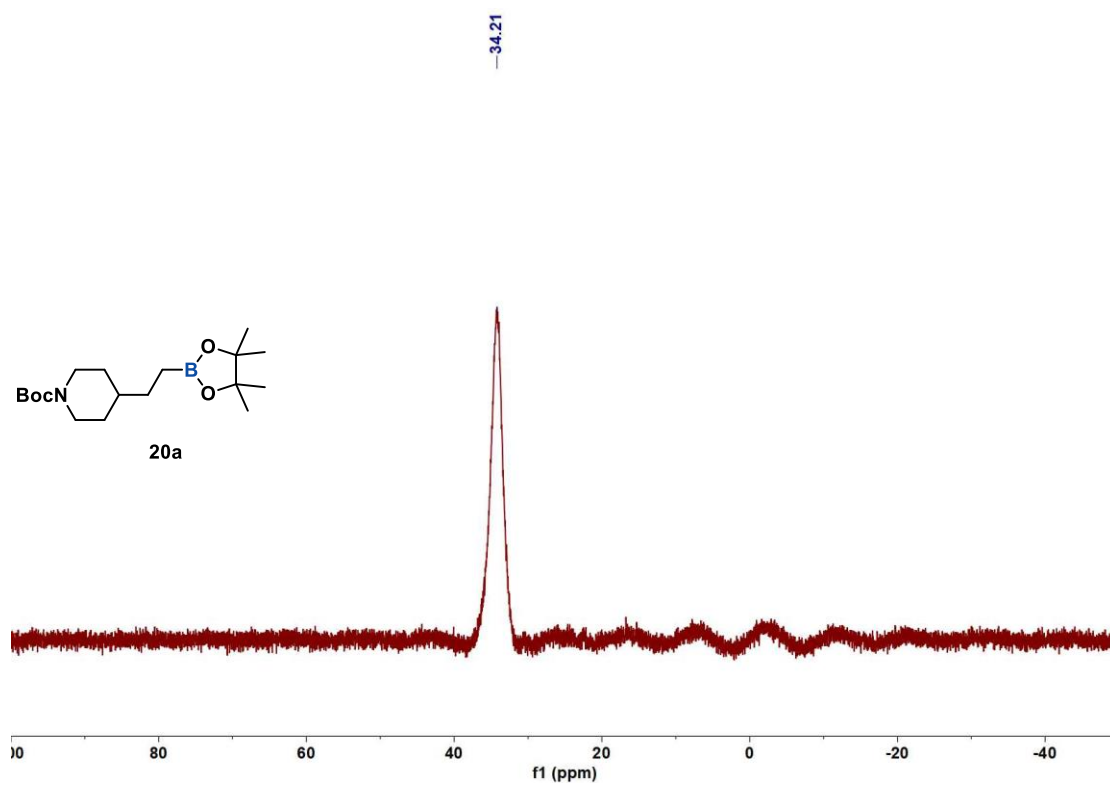

**Figure S133.**  $^{11}\text{B}\{^1\text{H}\}$  NMR spectrum of **20a** in  $\text{CDCl}_3$  at 298K

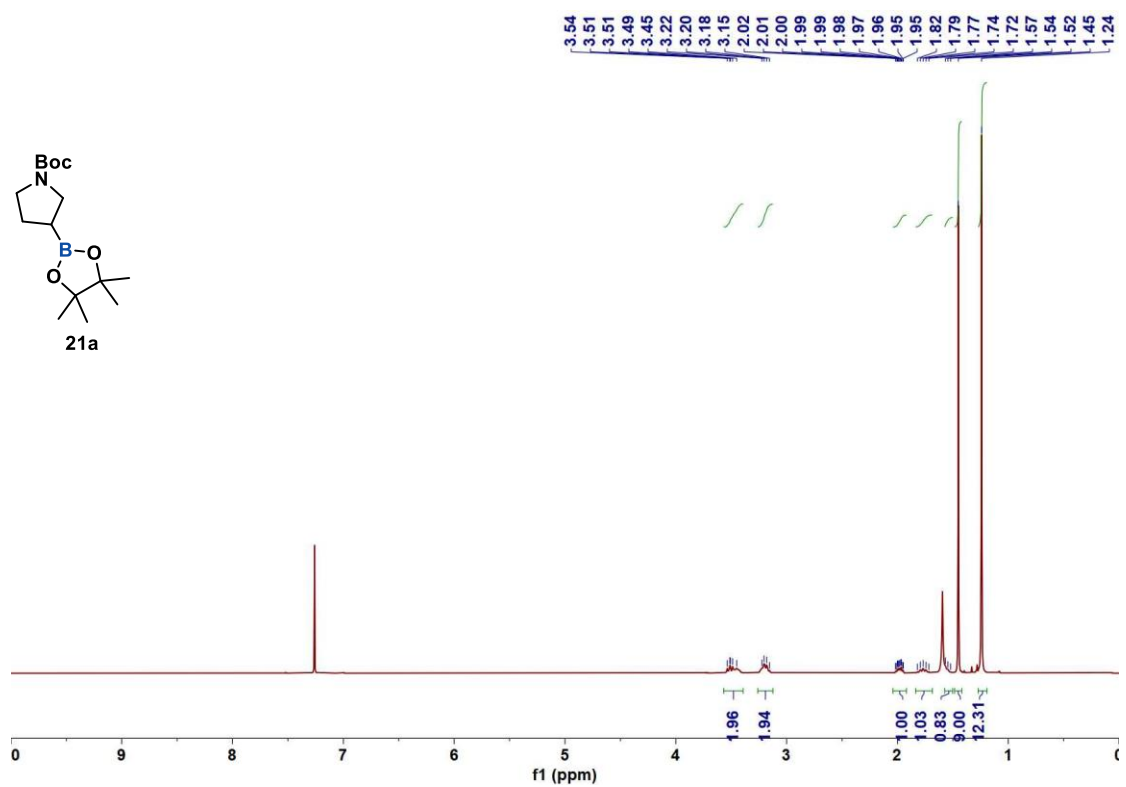

**Figure S134.** <sup>1</sup>H NMR spectrum of **21a** in CDCl<sub>3</sub> at 298K

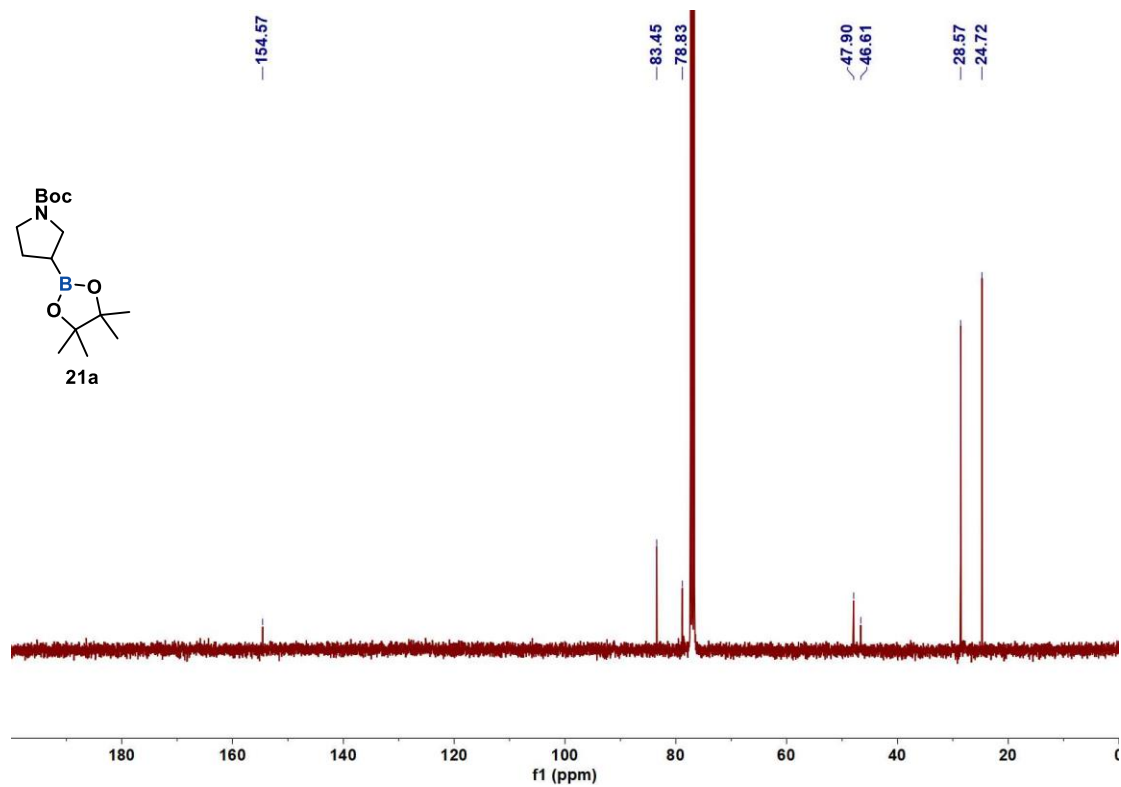

**Figure S135.**  $^{13}\text{C}\{^1\text{H}\}$  NMR spectrum of **21a** in  $\text{CDCl}_3$  at 298K



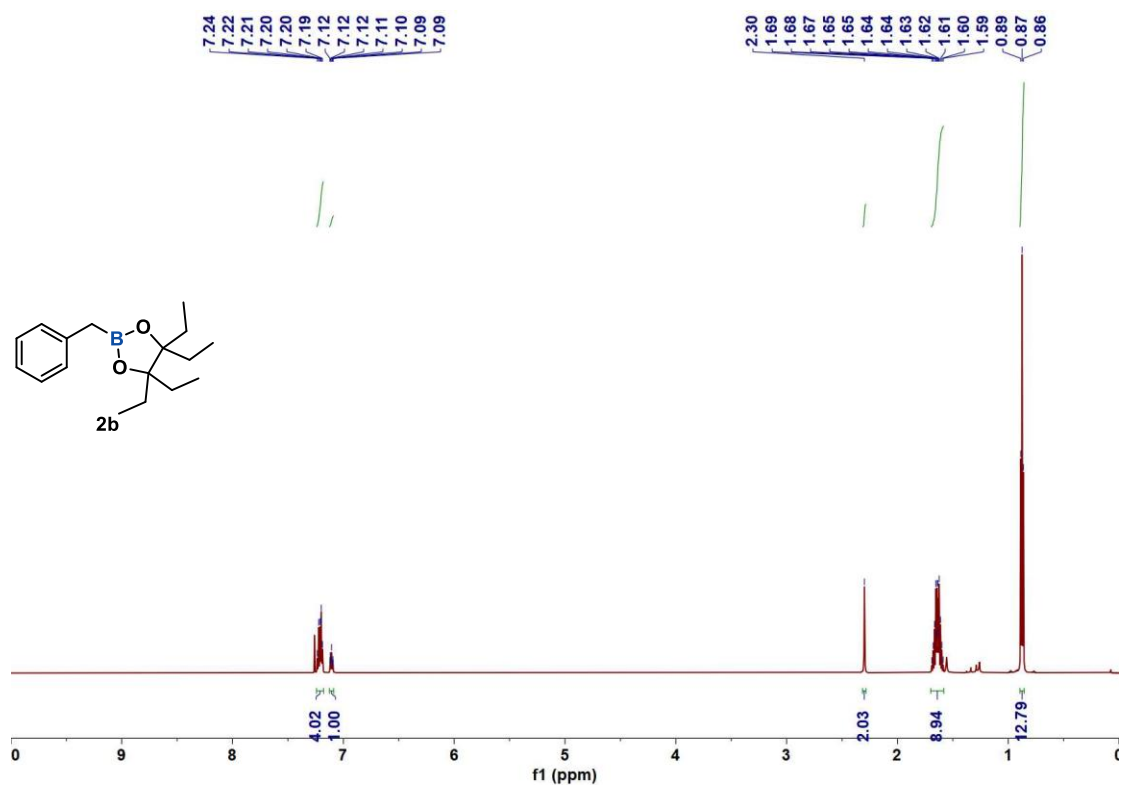

**Figure S136.** <sup>1</sup>H NMR spectrum of **2b** in CDCl<sub>3</sub> at 298K

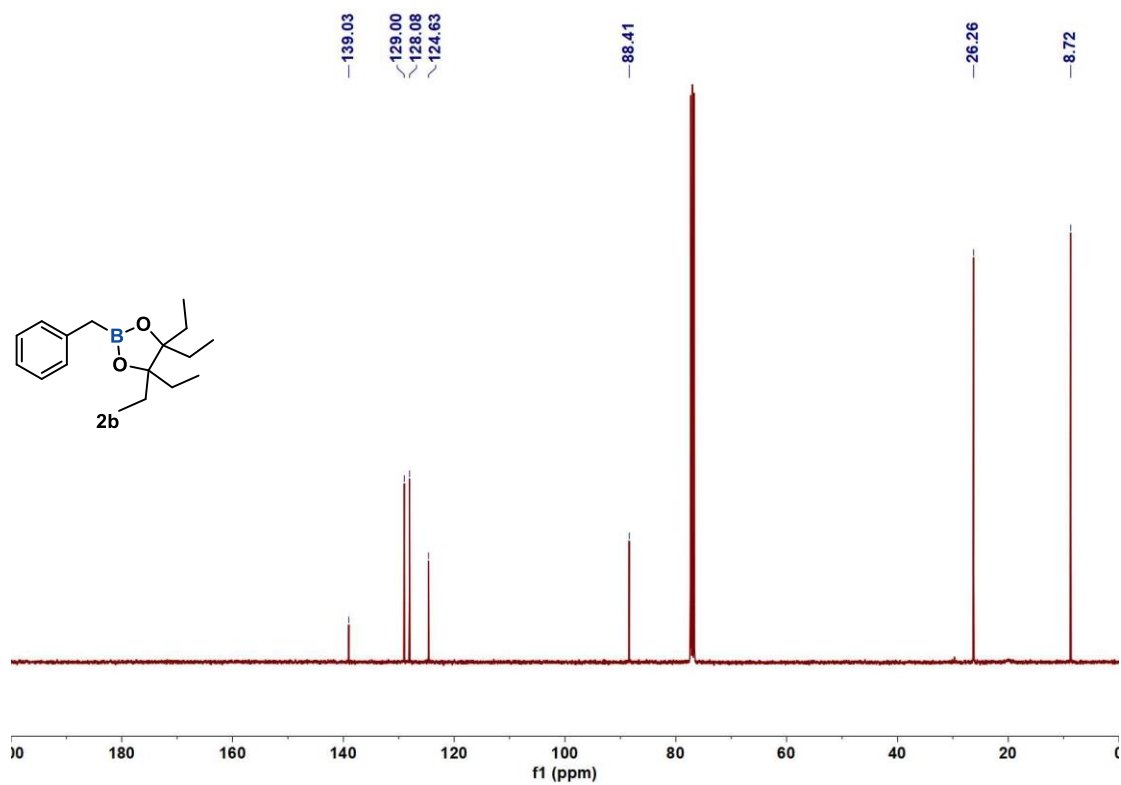

**Figure S137.**  $^{13}\text{C}\{^1\text{H}\}$  NMR spectrum of **2b** in  $\text{CDCl}_3$  at 298K

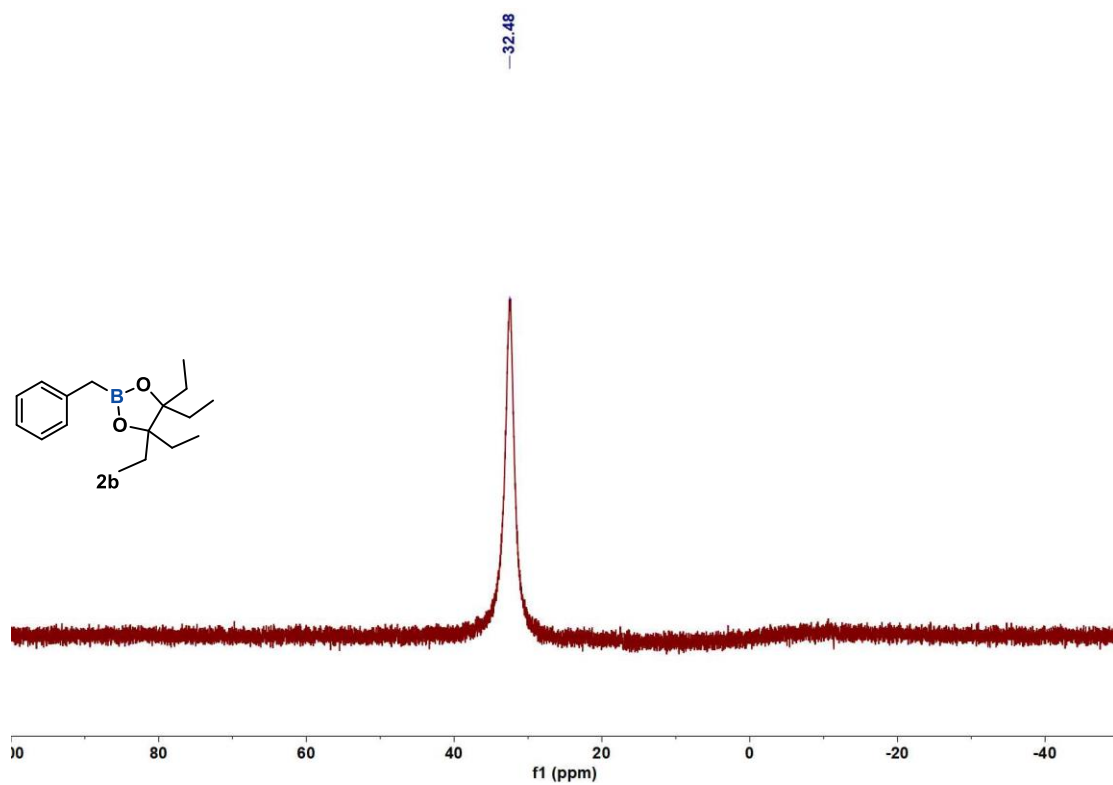

**Figure S138.**  $^{11}\text{B}\{^1\text{H}\}$  NMR spectrum of **2b** in  $\text{CDCl}_3$  at 298K

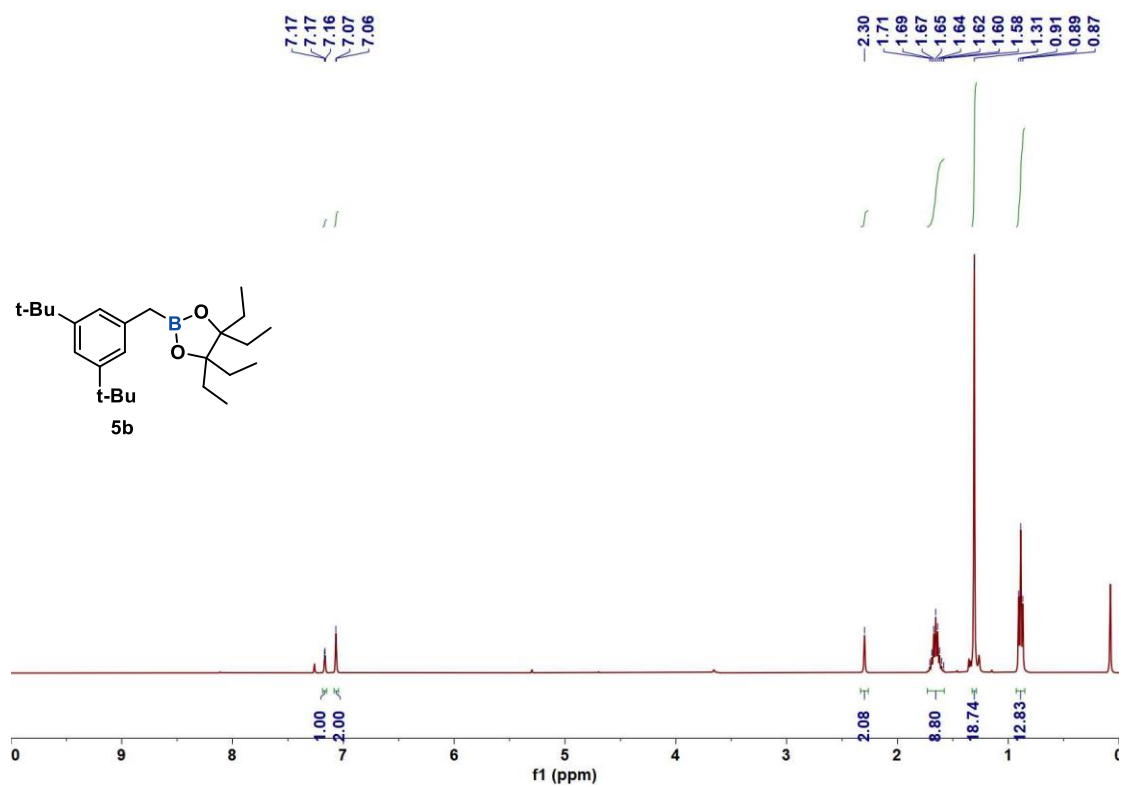

**Figure S139.** <sup>1</sup>H NMR spectrum of **5b** in CDCl<sub>3</sub> at 298K

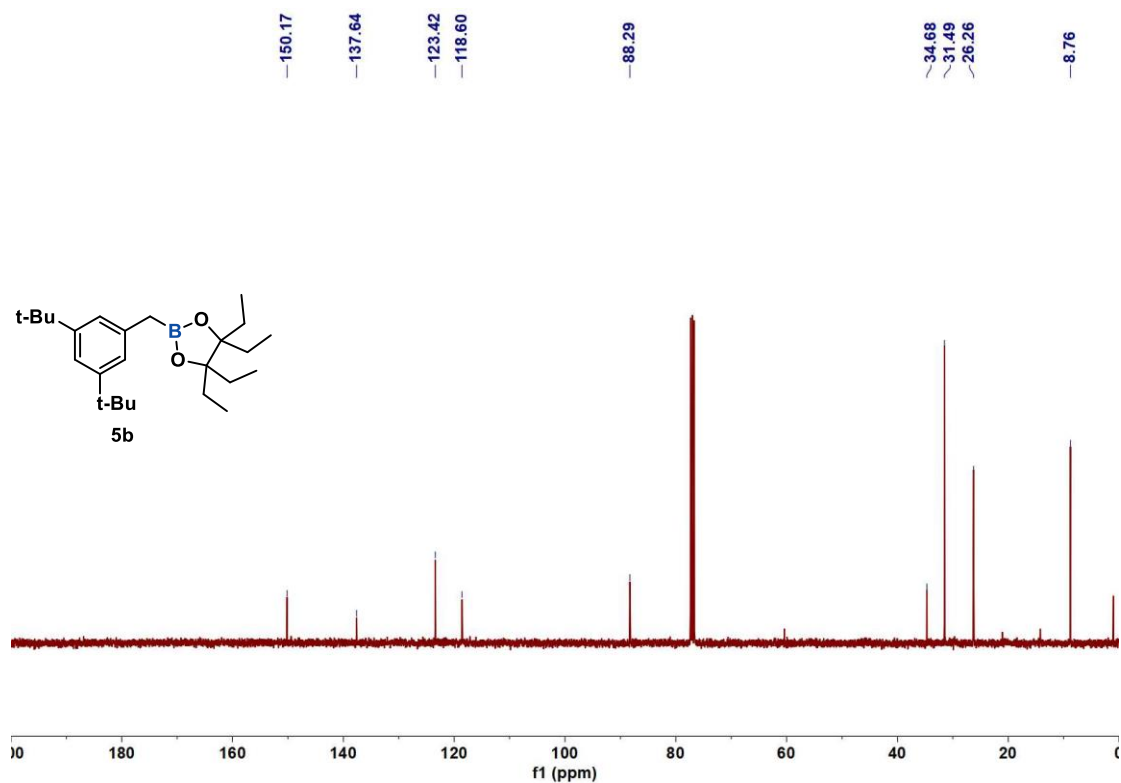

**Figure S140.**  $^{13}\text{C}\{^1\text{H}\}$  NMR spectrum of **5b** in  $\text{CDCl}_3$  at 298K

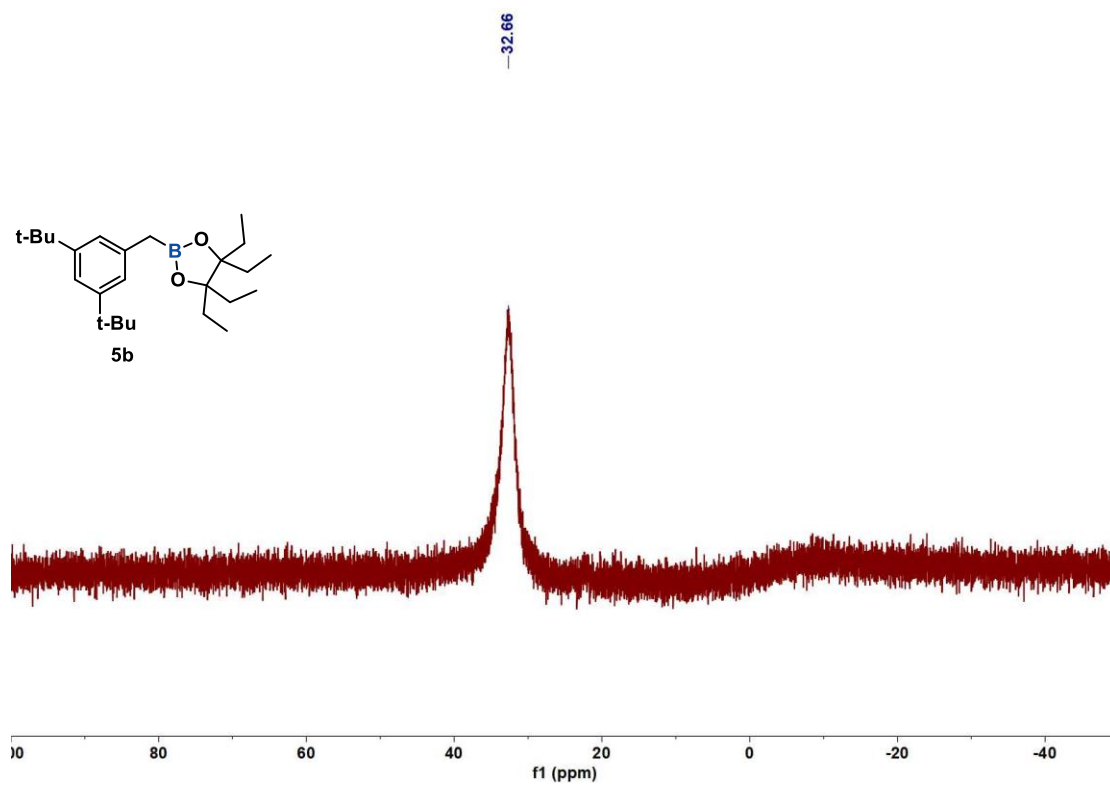

**Figure S141.**  $^{11}\text{B}\{^1\text{H}\}$  NMR spectrum of **5b** in  $\text{CDCl}_3$  at 298K

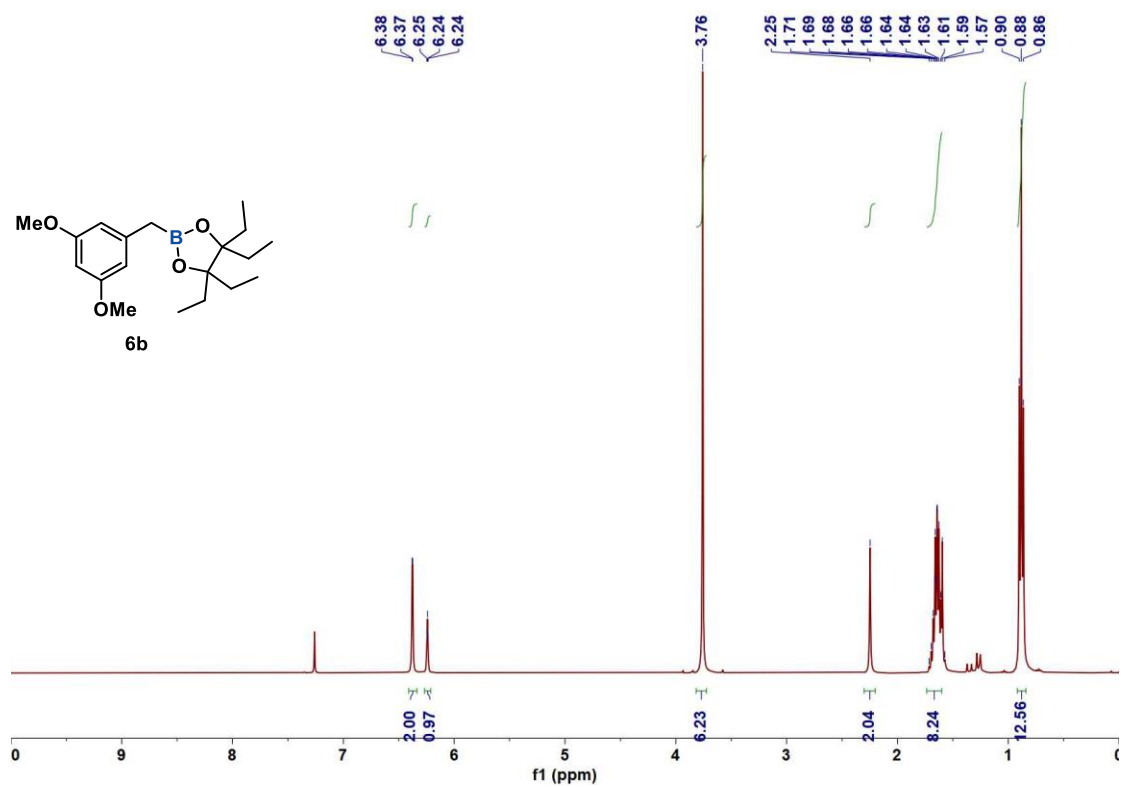

**Figure S142.** <sup>1</sup>H NMR spectrum of **6b** in CDCl<sub>3</sub> at 298K

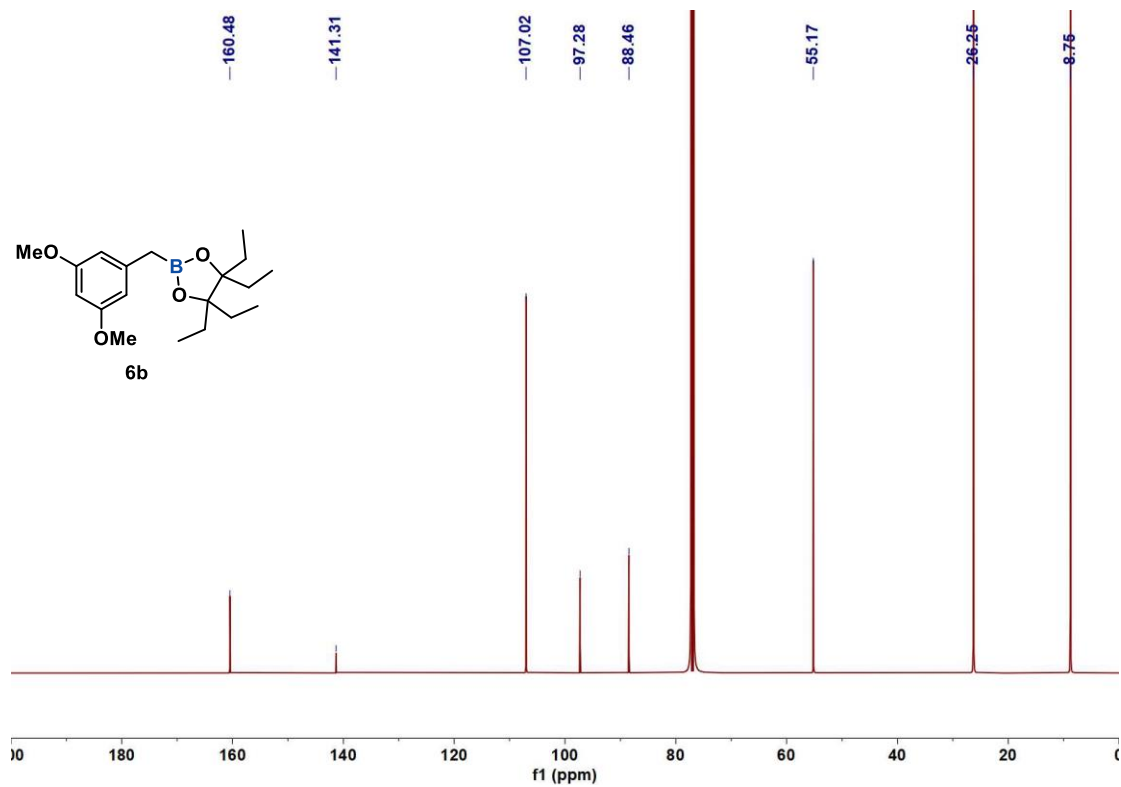

**Figure S143.**  $^{13}\text{C}\{^1\text{H}\}$  NMR spectrum of **6b** in  $\text{CDCl}_3$  at 298K



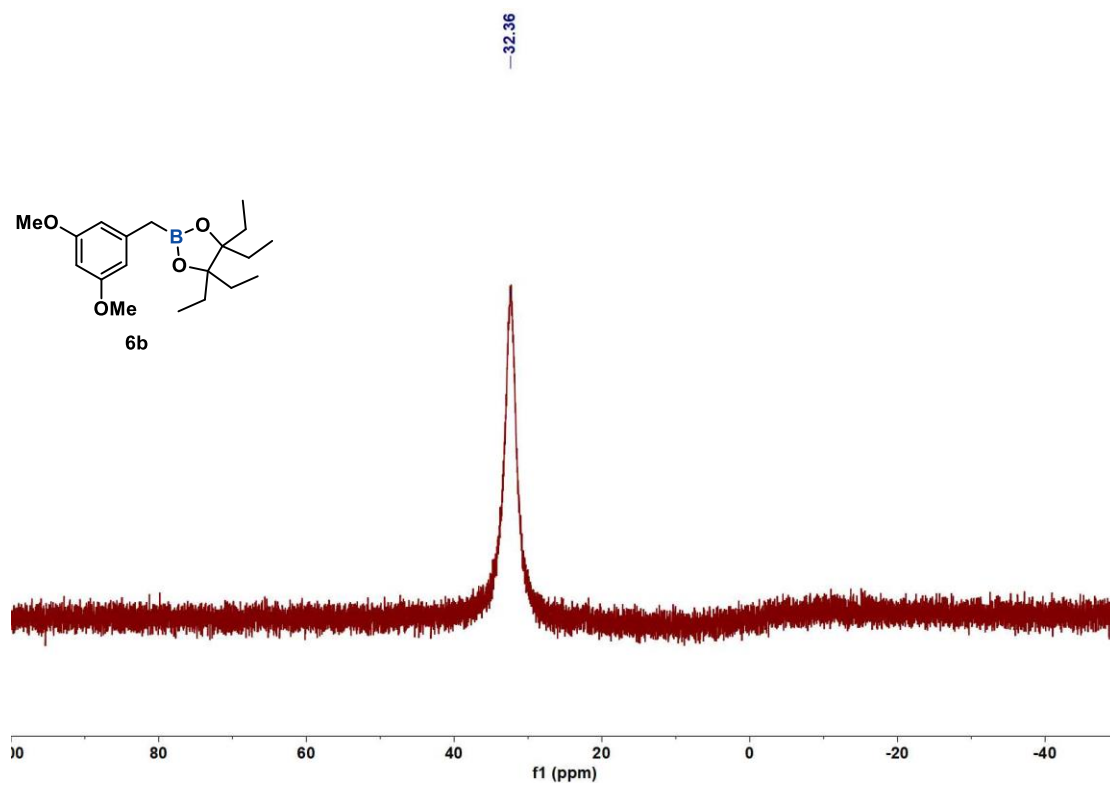

**Figure S144.**  $^{11}\text{B}\{^1\text{H}\}$  NMR spectrum of **6b** in  $\text{CDCl}_3$  at 298K

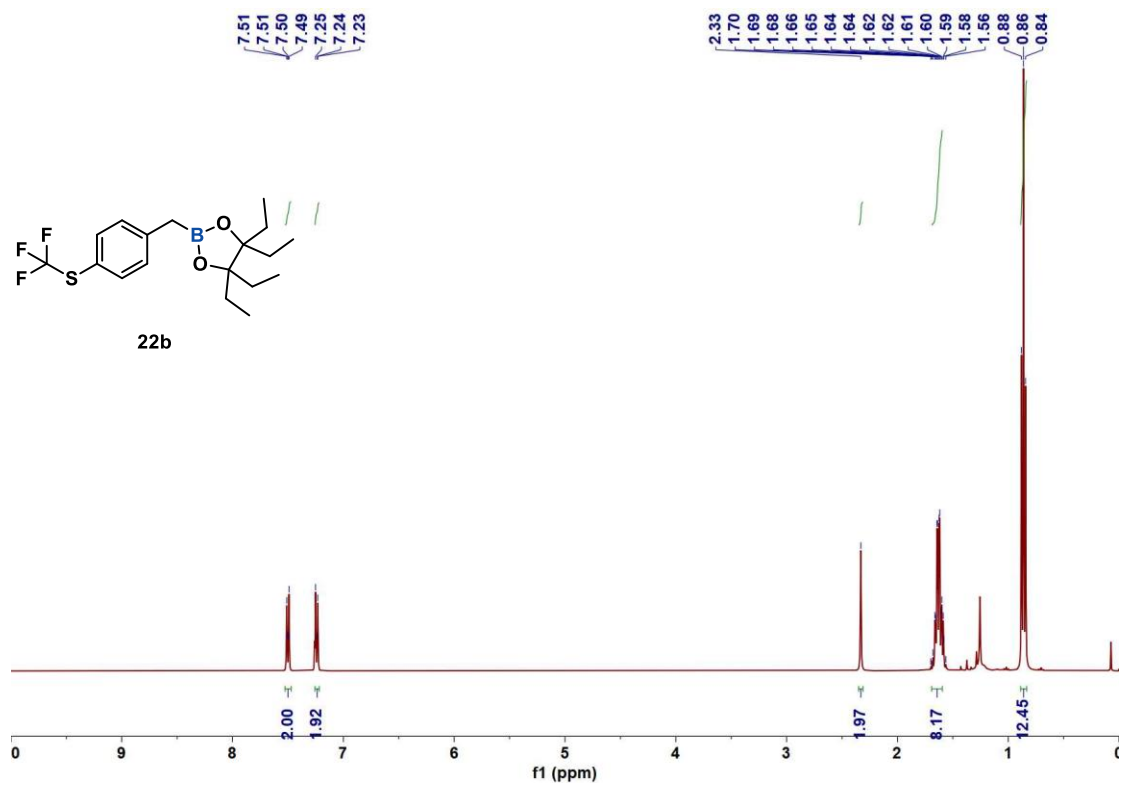

**Figure S145.** <sup>1</sup>H NMR spectrum of **22b** in CDCl<sub>3</sub> at 298K

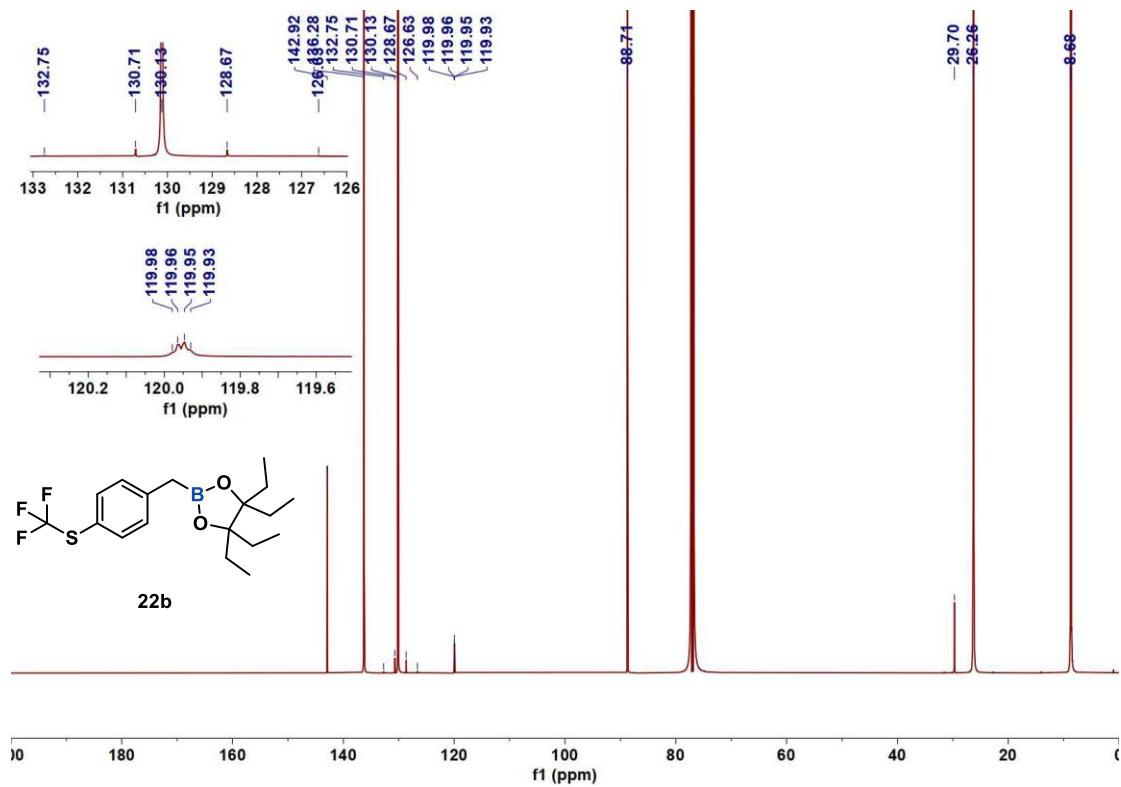

**Figure S146.**  $^{13}\text{C}\{^1\text{H}\}$  NMR spectrum of **22b** in  $\text{CDCl}_3$  at 298K

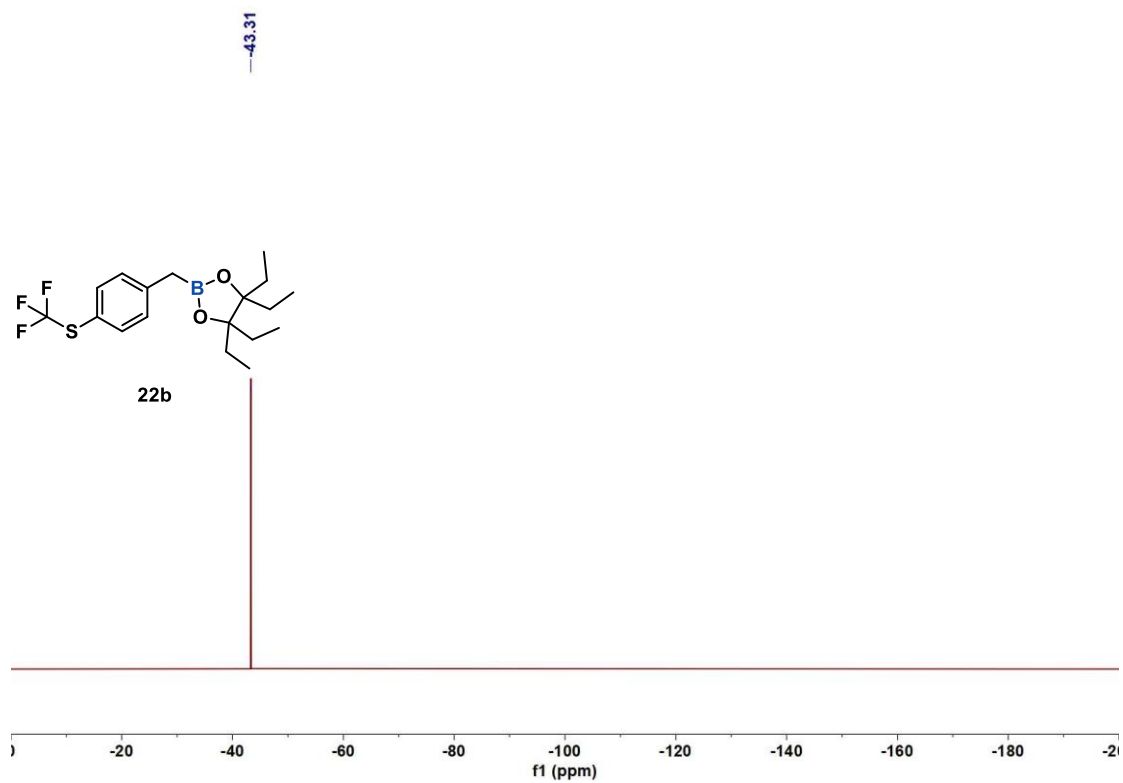

**Figure S147.**  $^{19}\text{F}$   $\{^1\text{H}\}$  NMR spectrum of **22b** in  $\text{CDCl}_3$  at 298K

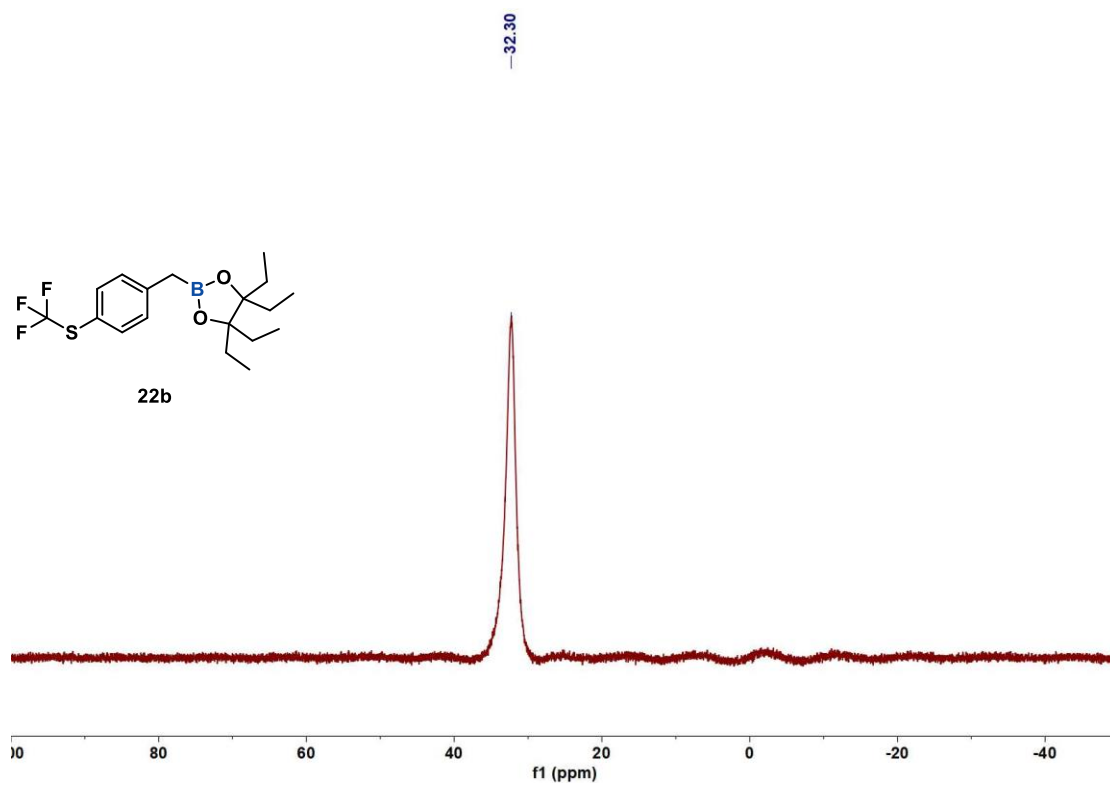

**Figure S148.**  $^{11}\text{B}\{^1\text{H}\}$  NMR spectrum of **22b** in  $\text{CDCl}_3$  at 298K

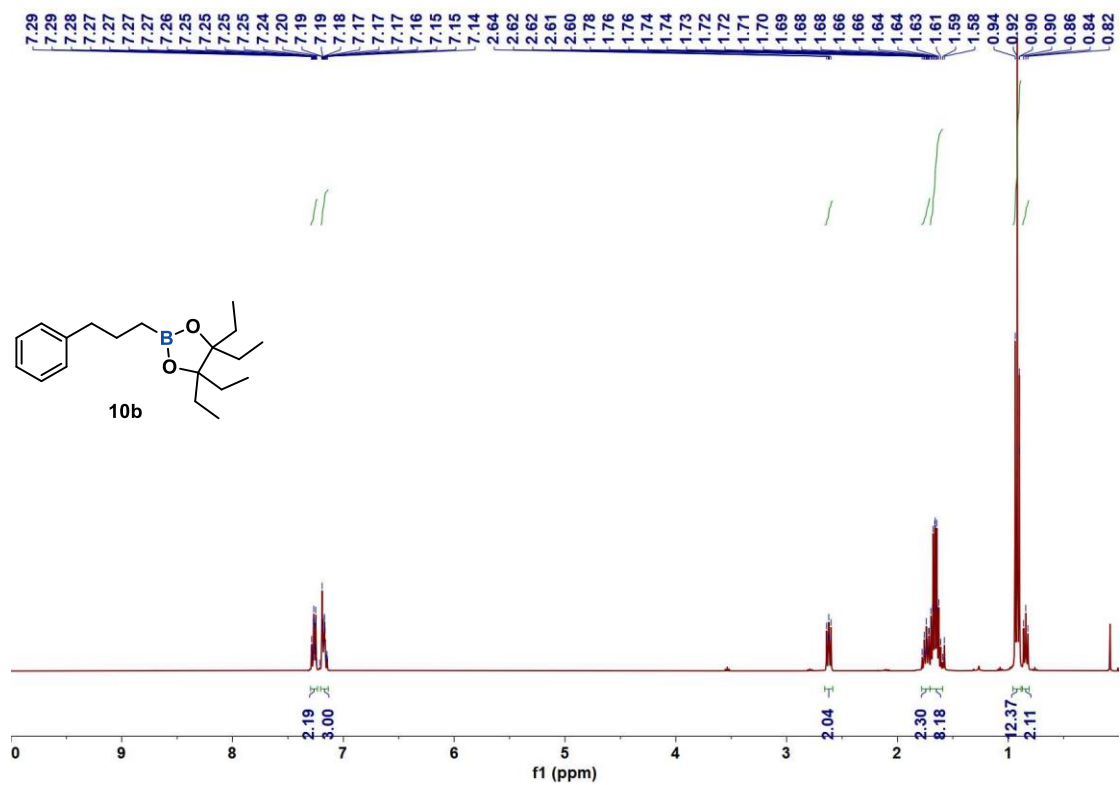

**Figure S149.** <sup>1</sup>H NMR spectrum of **10b** in CDCl<sub>3</sub> at 298K

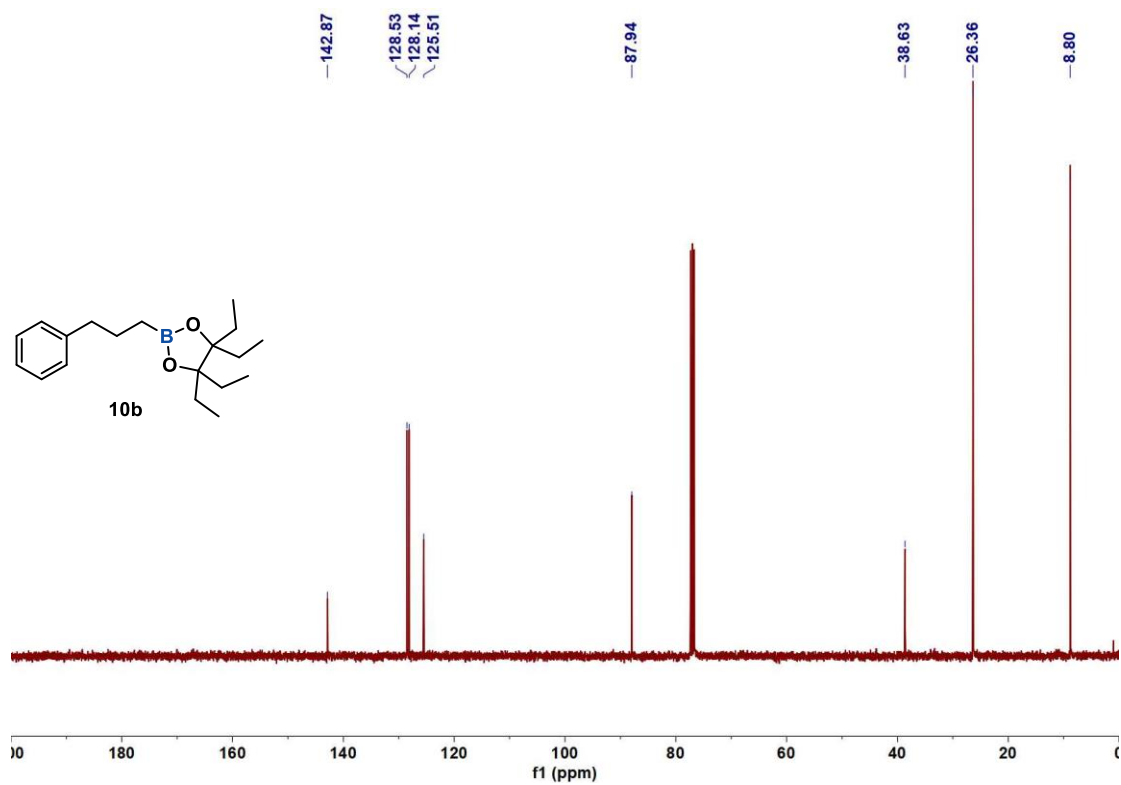

**Figure S150.**  $^{13}\text{C}\{^1\text{H}\}$  NMR spectrum of **10b** in  $\text{CDCl}_3$  at 298K

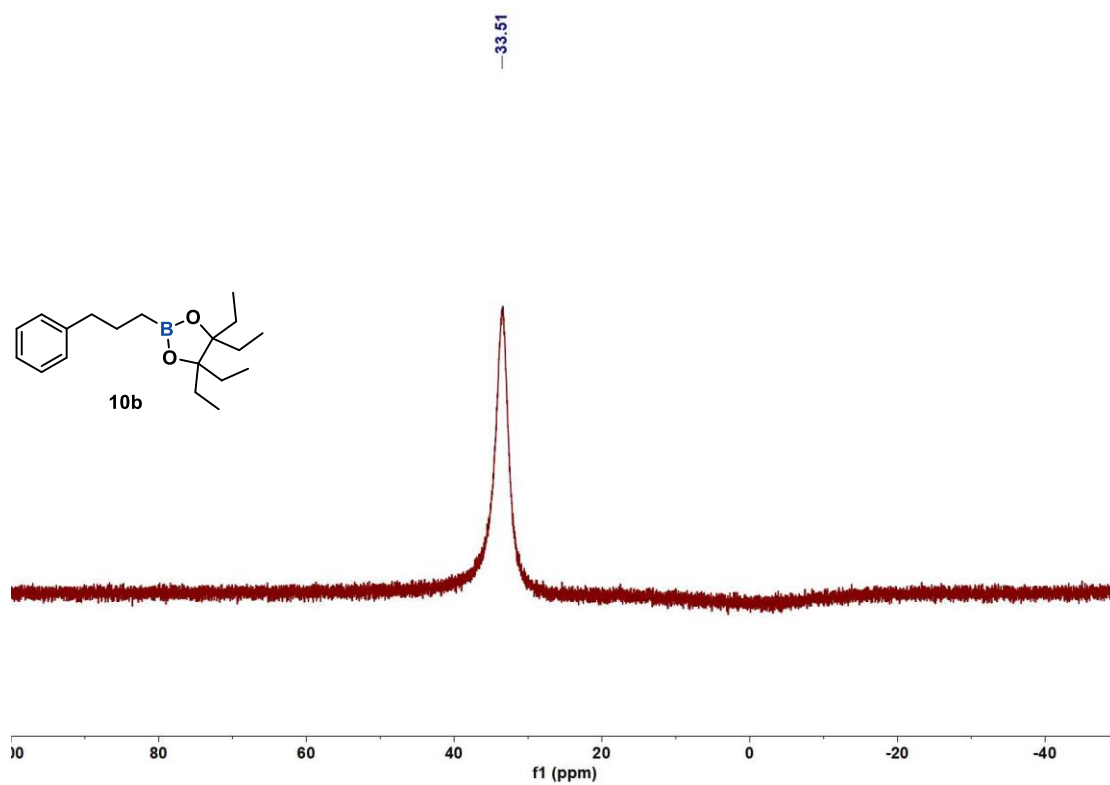

**Figure S151.**  $^{11}\text{B}\{^1\text{H}\}$  NMR spectrum of **10b** in  $\text{CDCl}_3$  at 298K



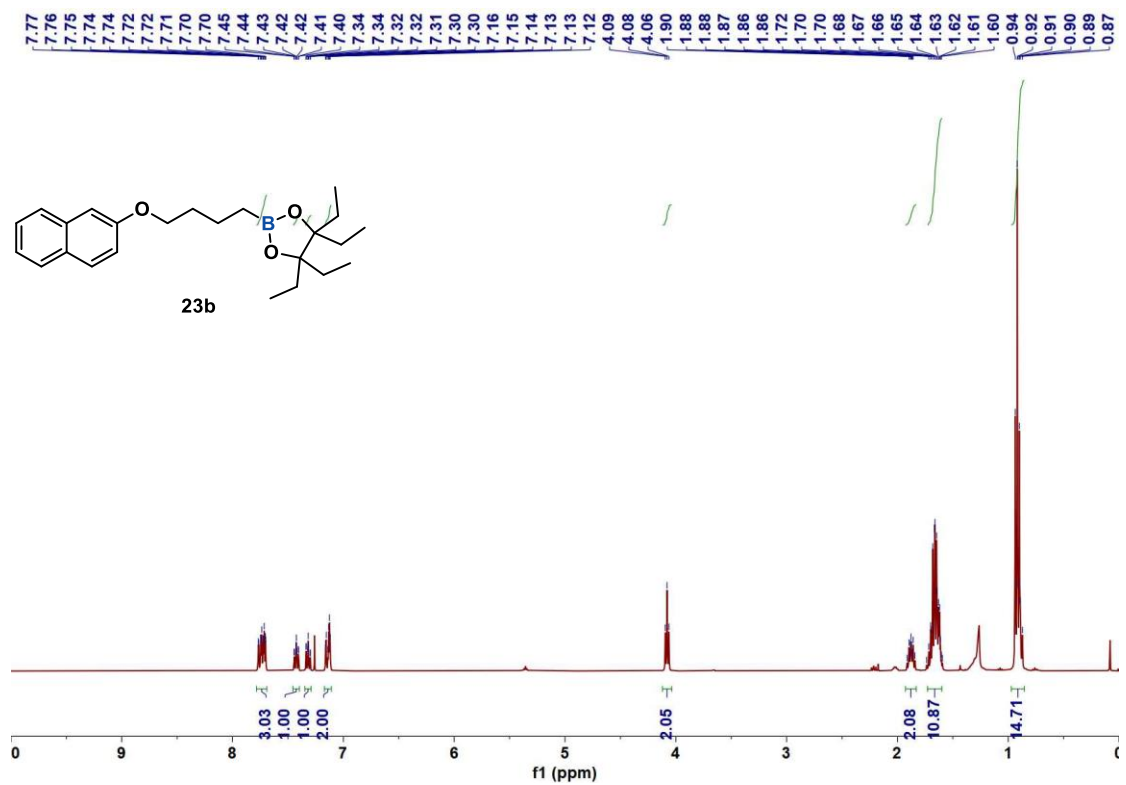

**Figure S152.** <sup>1</sup>H NMR spectrum of **23b** in CDCl<sub>3</sub> at 298K

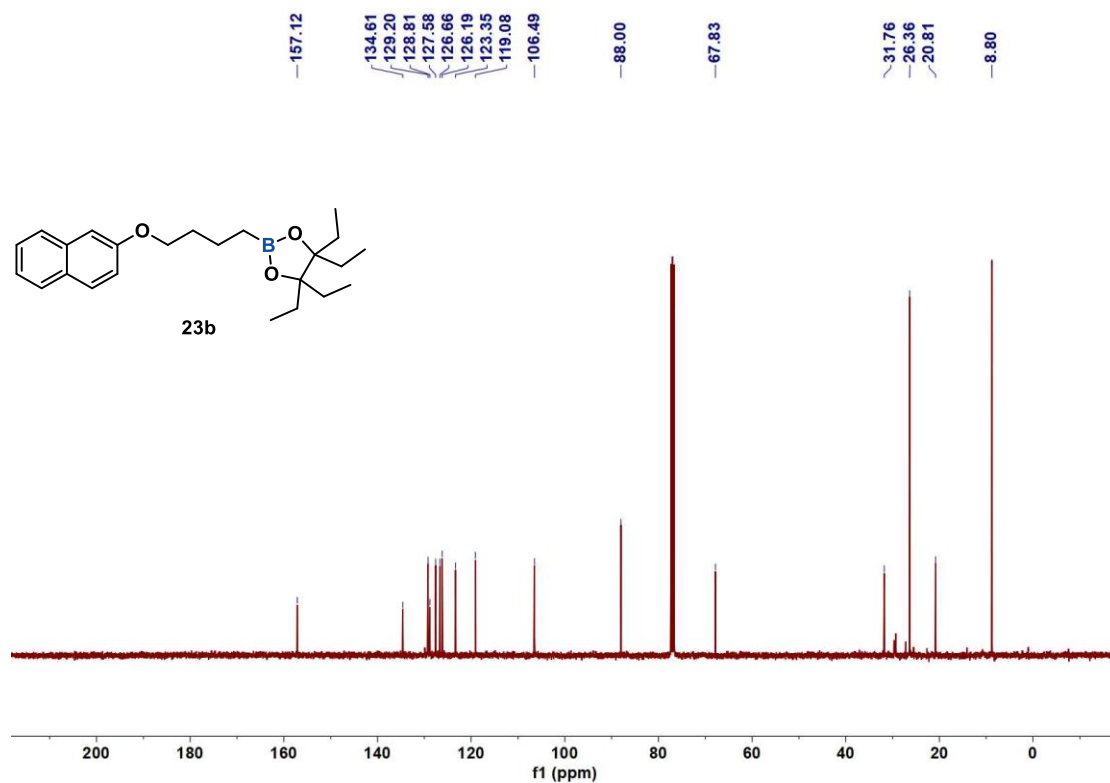

**Figure S153.**  $^{13}\text{C}\{^1\text{H}\}$  NMR spectrum of **23b** in  $\text{CDCl}_3$  at 298K

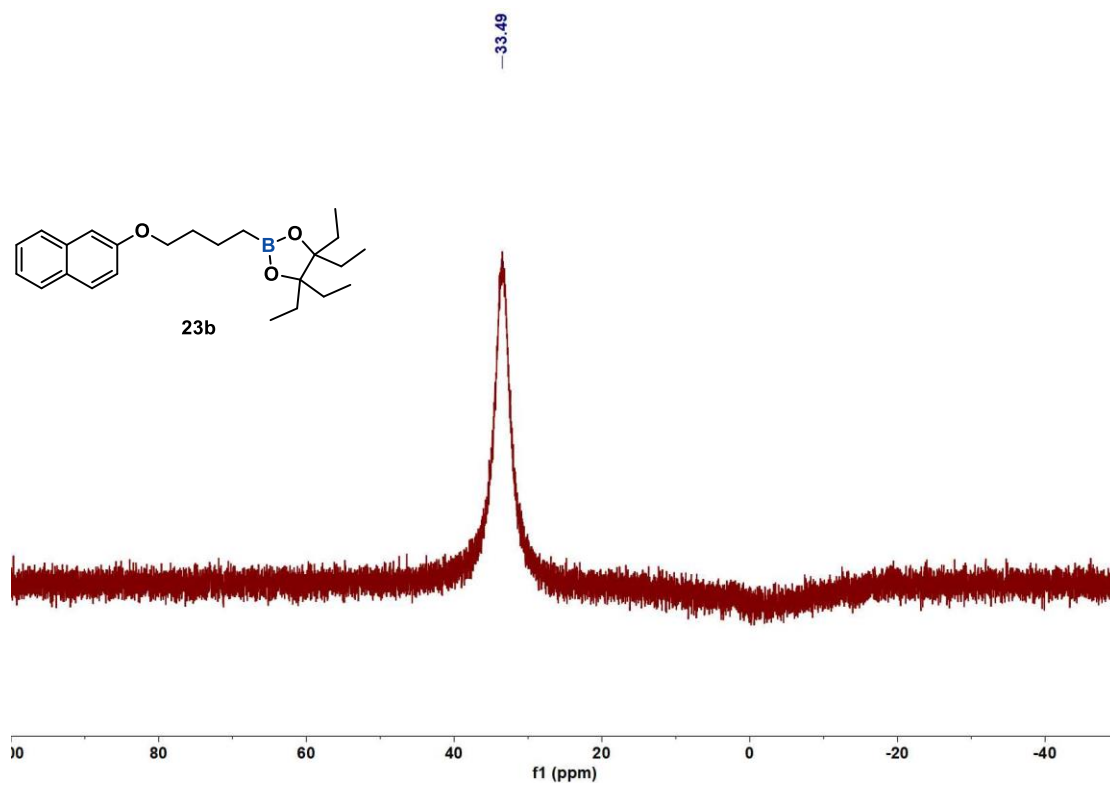

**Figure S154.**  $^{11}\text{B}\{^1\text{H}\}$  NMR spectrum of **23b** in  $\text{CDCl}_3$  at 298K

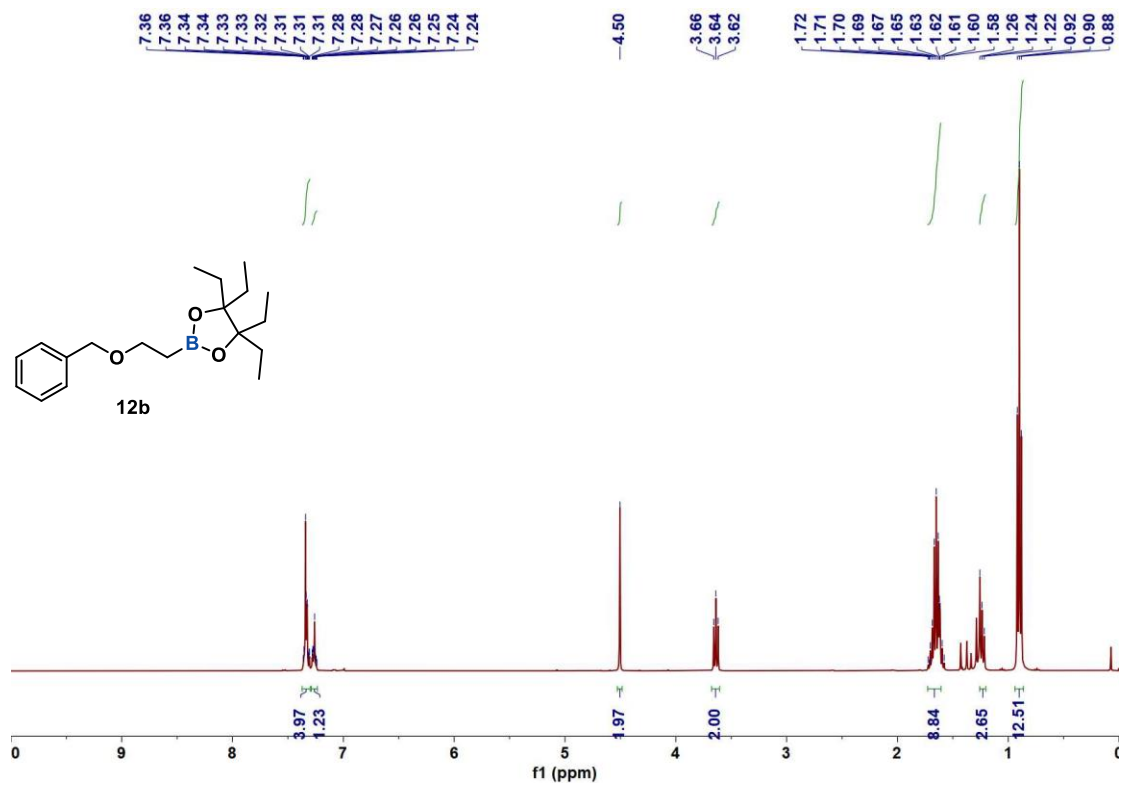

**Figure S155.** <sup>1</sup>H NMR spectrum of **12b** in CDCl<sub>3</sub> at 298K

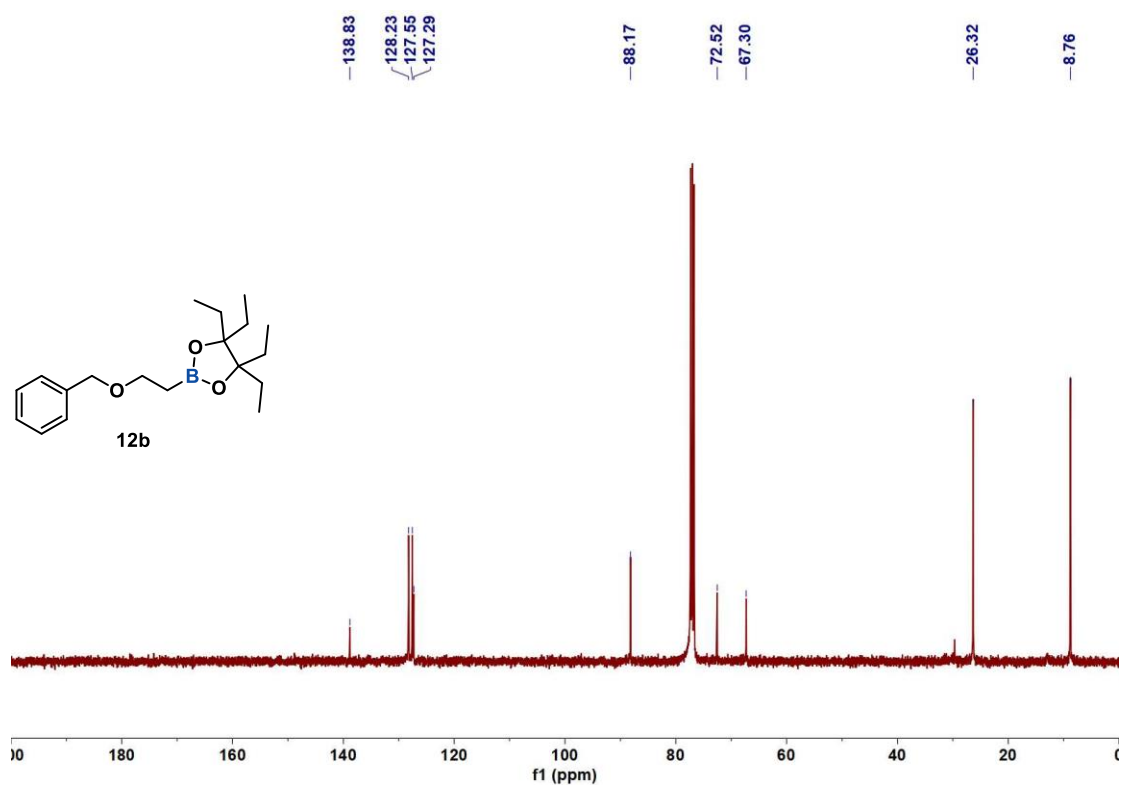

**Figure S156.**  $^{13}\text{C}\{^1\text{H}\}$  NMR spectrum of **12b** in  $\text{CDCl}_3$  at 298K

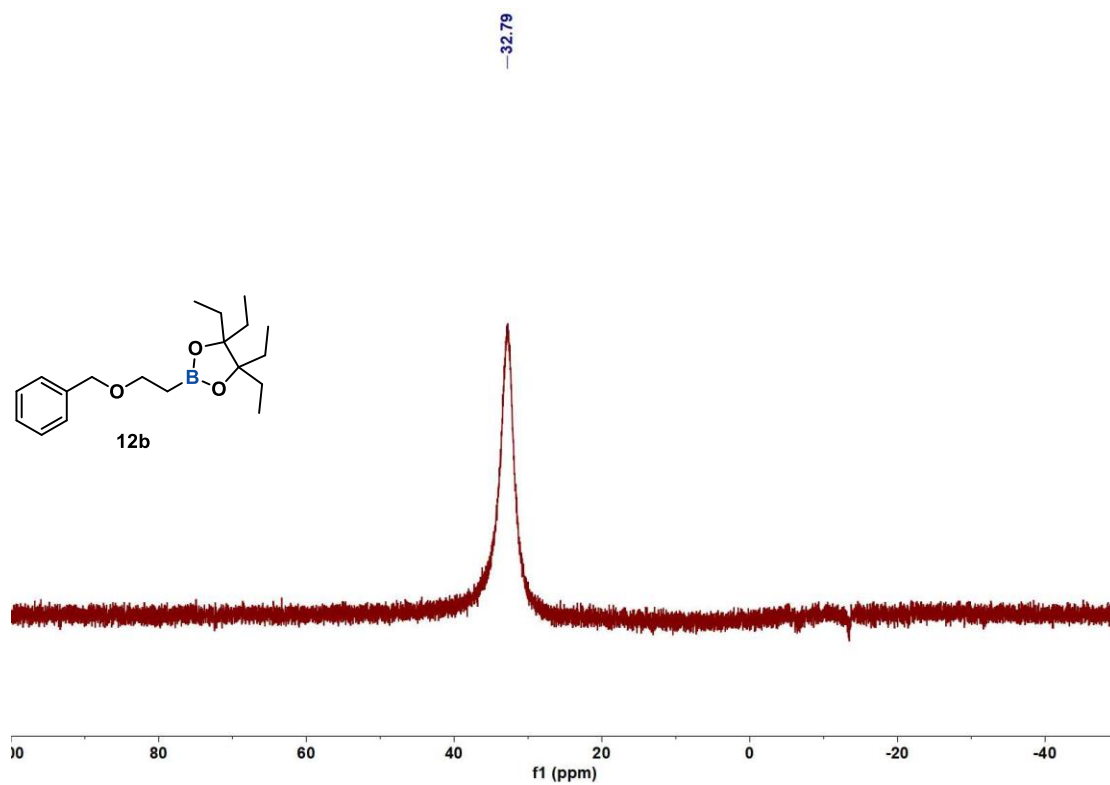

**Figure S157.**  $^{11}\text{B}\{^1\text{H}\}$  NMR spectrum of **12b** in  $\text{CDCl}_3$  at 298K

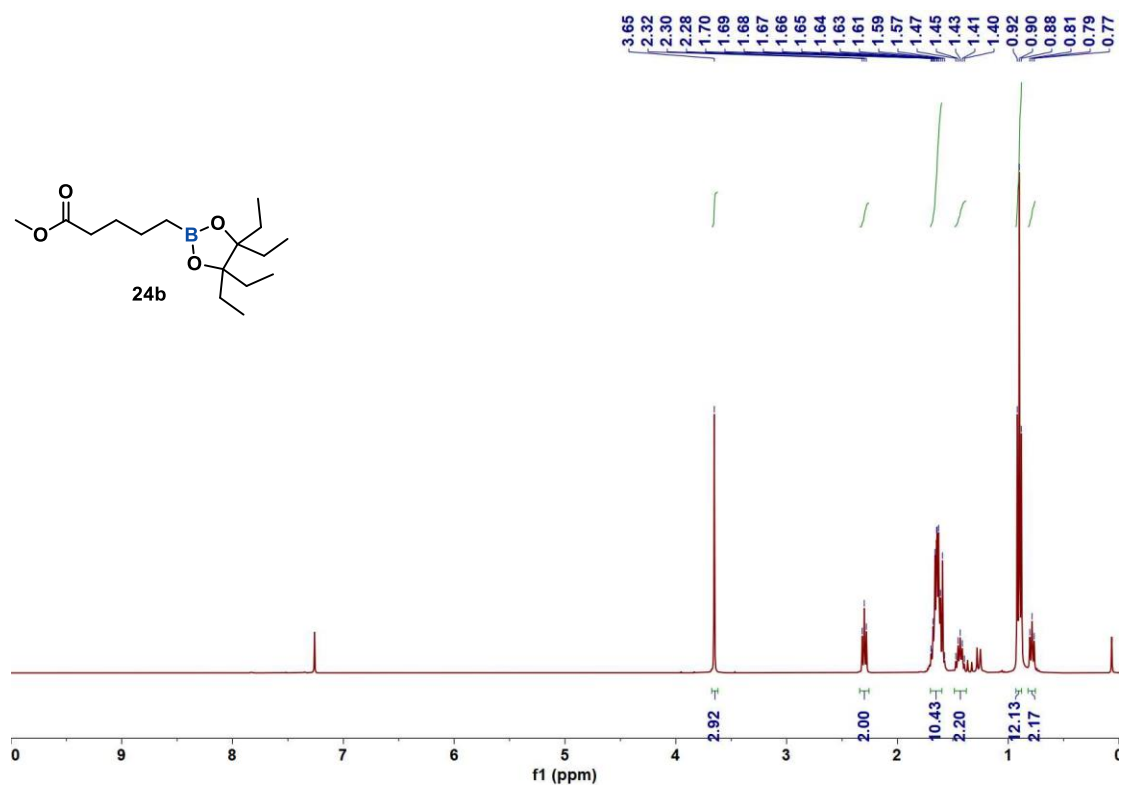

**Figure S158.** <sup>1</sup>H NMR spectrum of **24b** in CDCl<sub>3</sub> at 298K

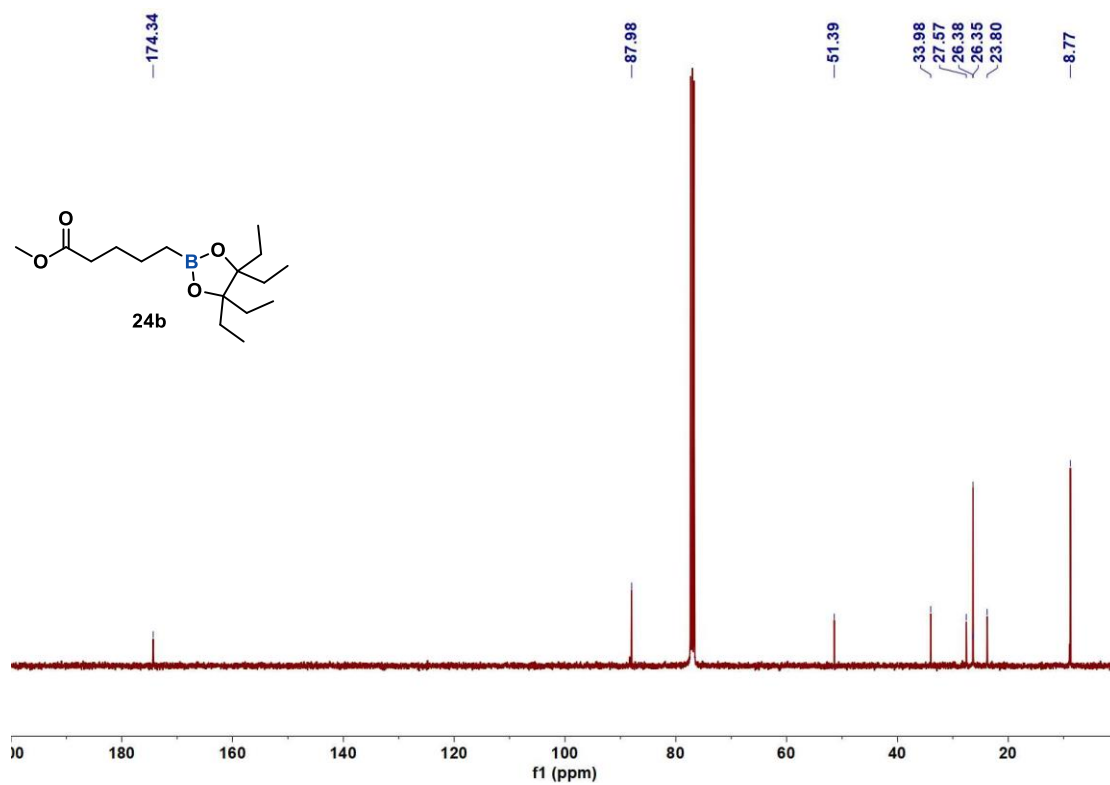

**Figure S159.**  $^{13}\text{C}\{^1\text{H}\}$  NMR spectrum of **24b** in  $\text{CDCl}_3$  at 298K



-33.53

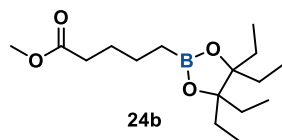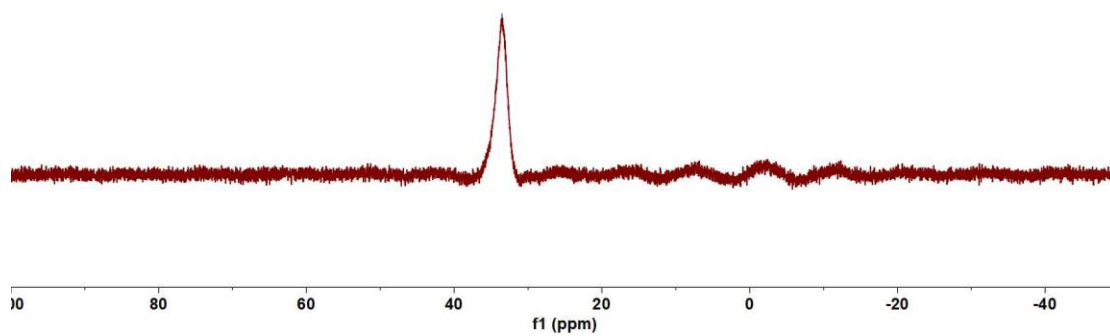

**Figure S160.**  $^{11}\text{B}\{^1\text{H}\}$  NMR spectrum of **24b** in  $\text{CDCl}_3$  at 298K

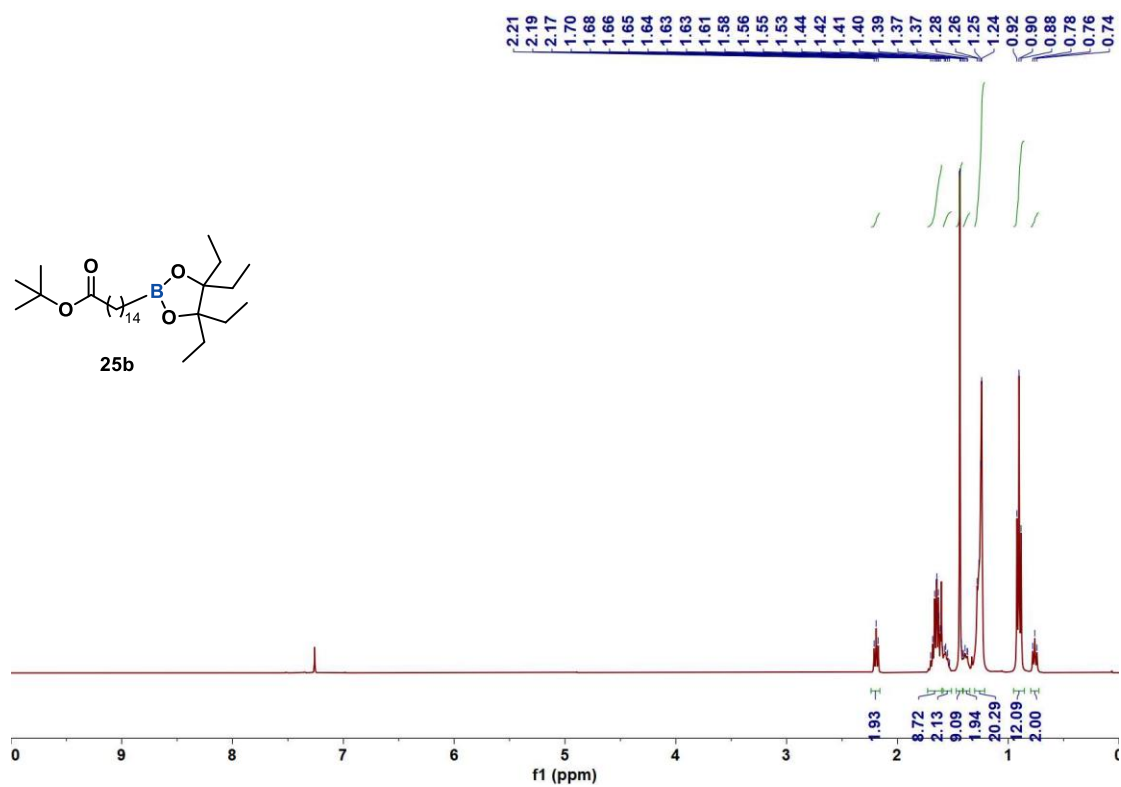

**Figure S161.** <sup>1</sup>H NMR spectrum of **25b** in CDCl<sub>3</sub> at 298K

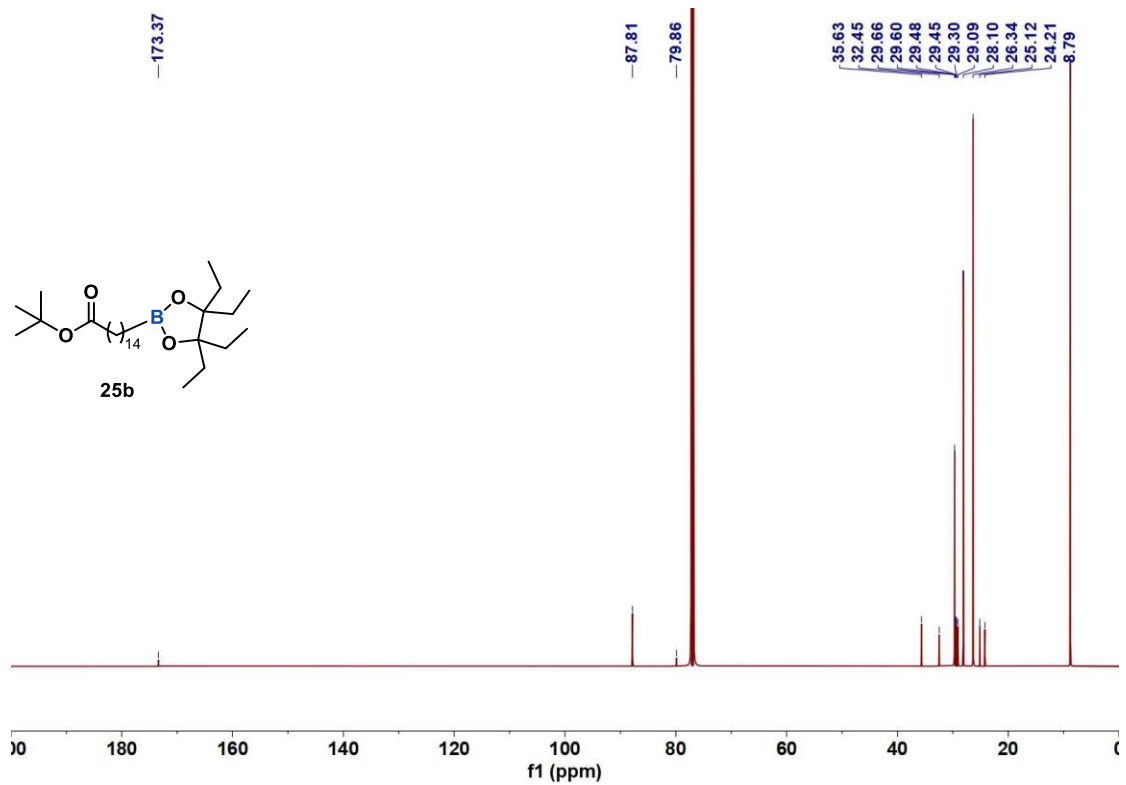

**Figure S162.**  $^{13}\text{C}\{^1\text{H}\}$  NMR spectrum of **25b** in  $\text{CDCl}_3$  at 298K

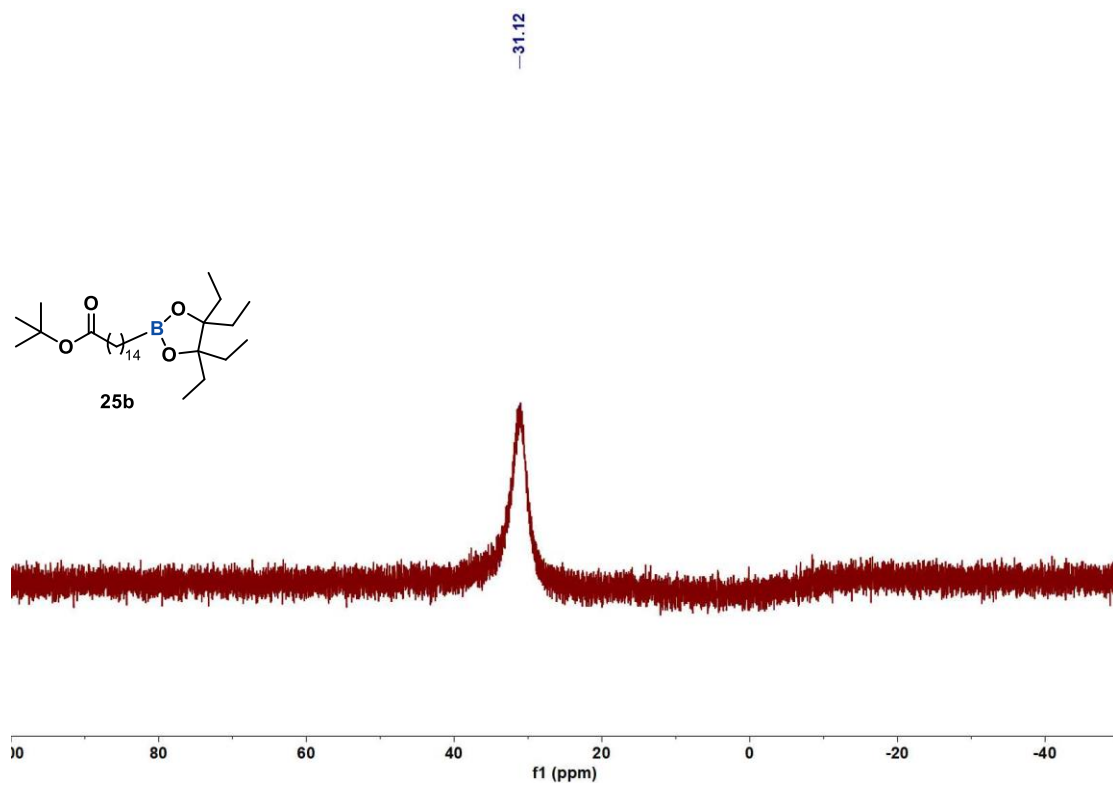

**Figure S163.**  $^{11}\text{B}\{^1\text{H}\}$  NMR spectrum of **25b** in  $\text{CDCl}_3$  at 298K

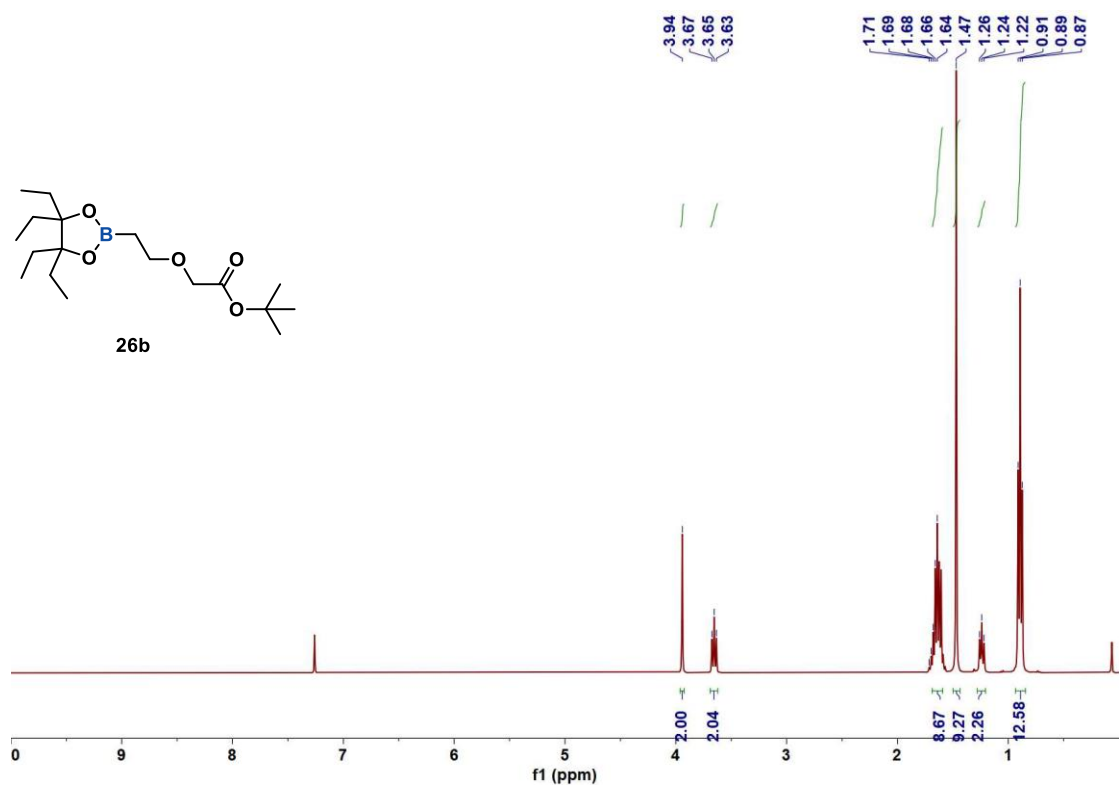

**Figure S164.** <sup>1</sup>H NMR spectrum of **26b** in CDCl<sub>3</sub> at 298K

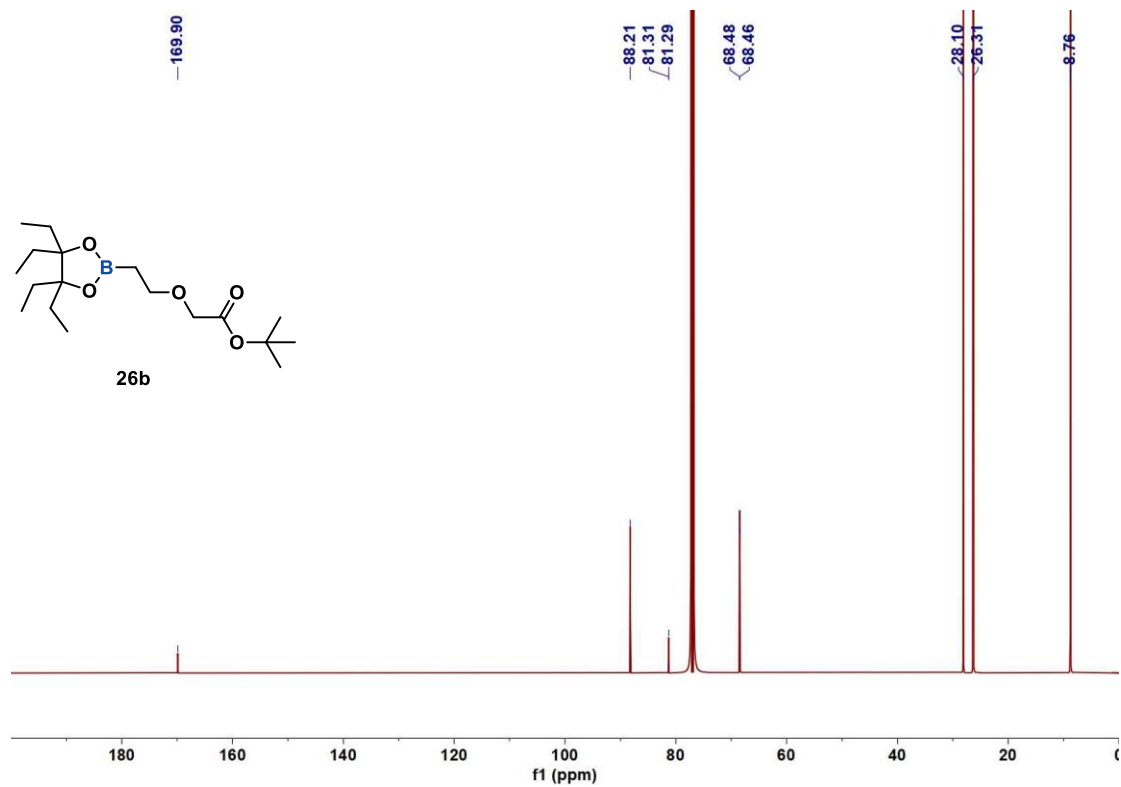

**Figure S165.**  $^{13}\text{C}\{^1\text{H}\}$  NMR spectrum of **26b** in  $\text{CDCl}_3$  at 298K

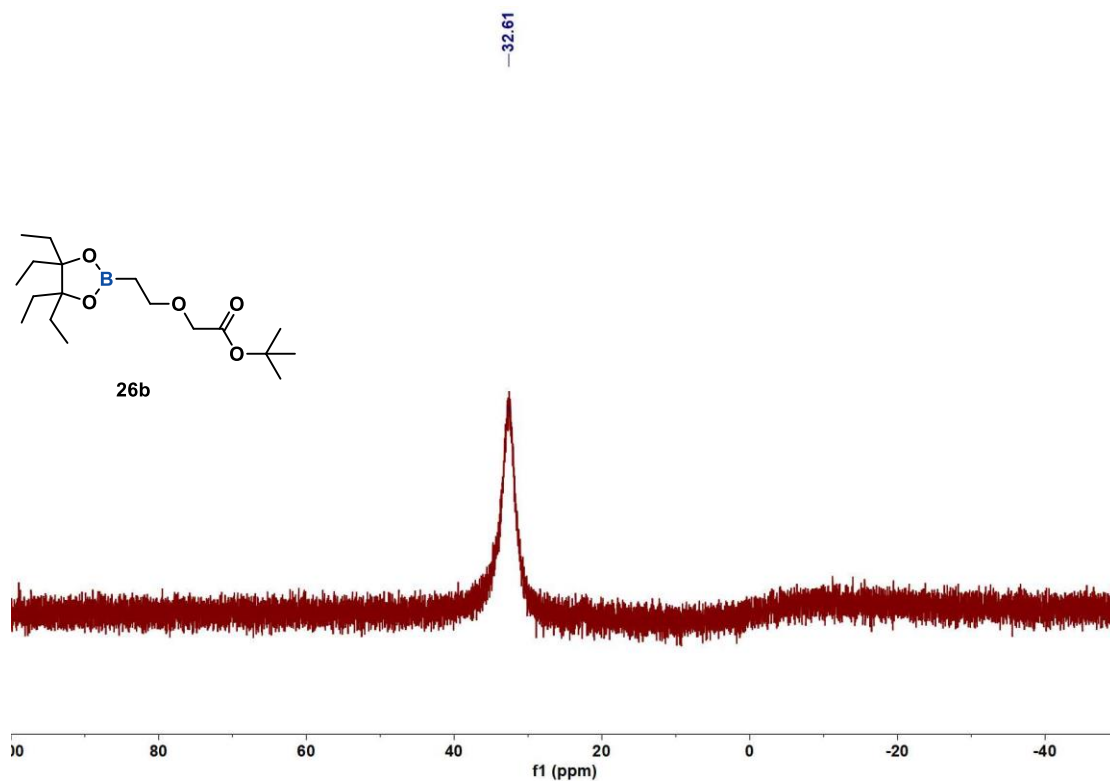

**Figure S166.**  $^{11}\text{B}\{^1\text{H}\}$  NMR spectrum of **26b** in  $\text{CDCl}_3$  at 298K

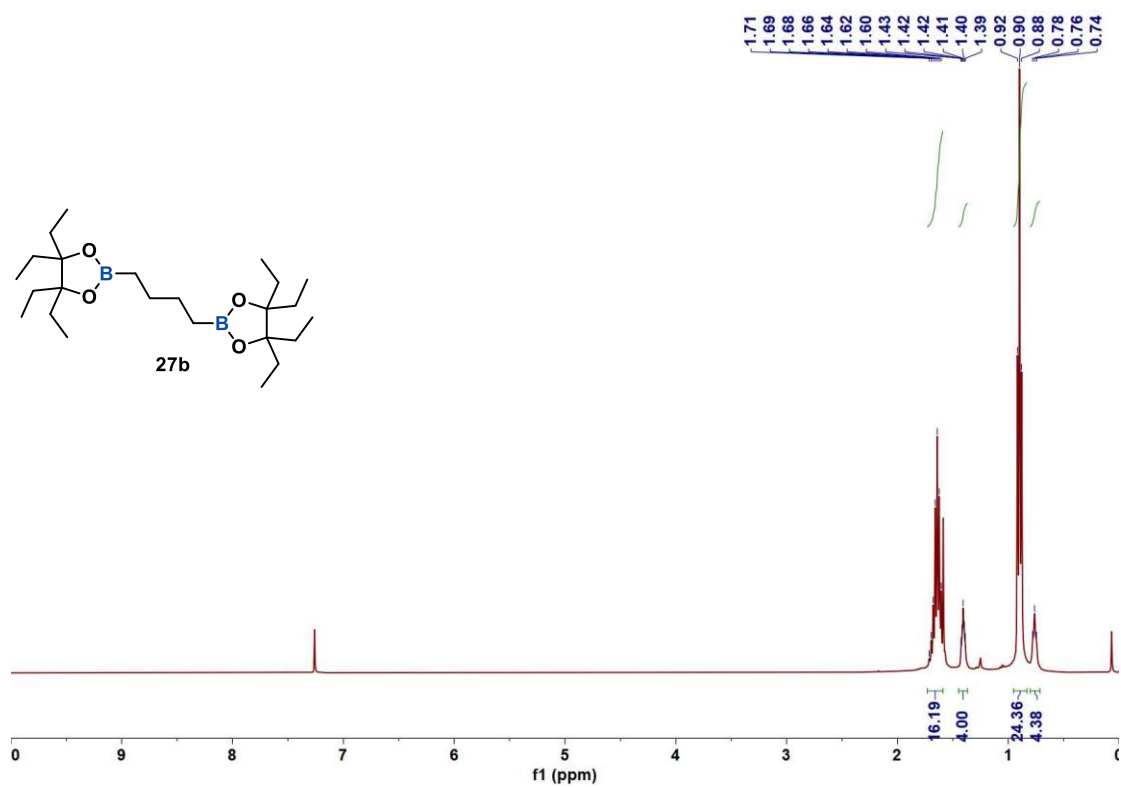

**Figure S167.**  $^1\text{H}$  NMR spectrum of **27b** in  $\text{CDCl}_3$  at 298K



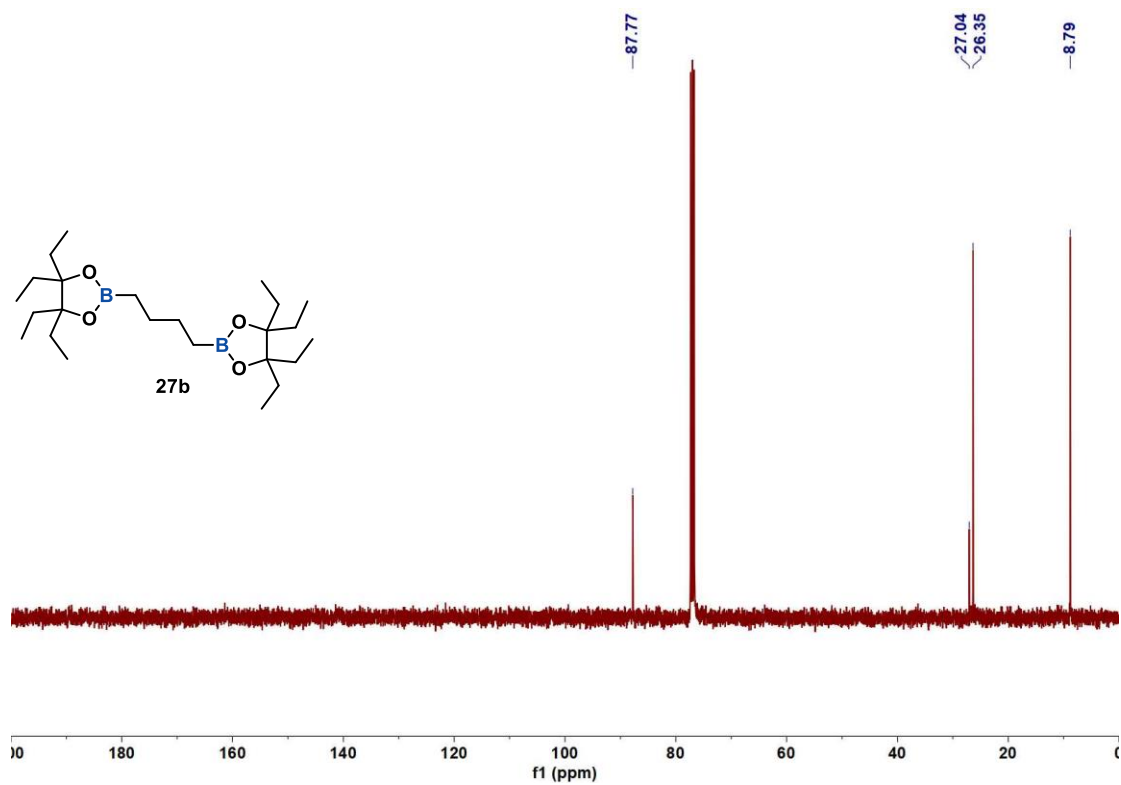

**Figure S168.**  $^{13}\text{C}\{^1\text{H}\}$  NMR spectrum of **27b** in  $\text{CDCl}_3$  at 298K

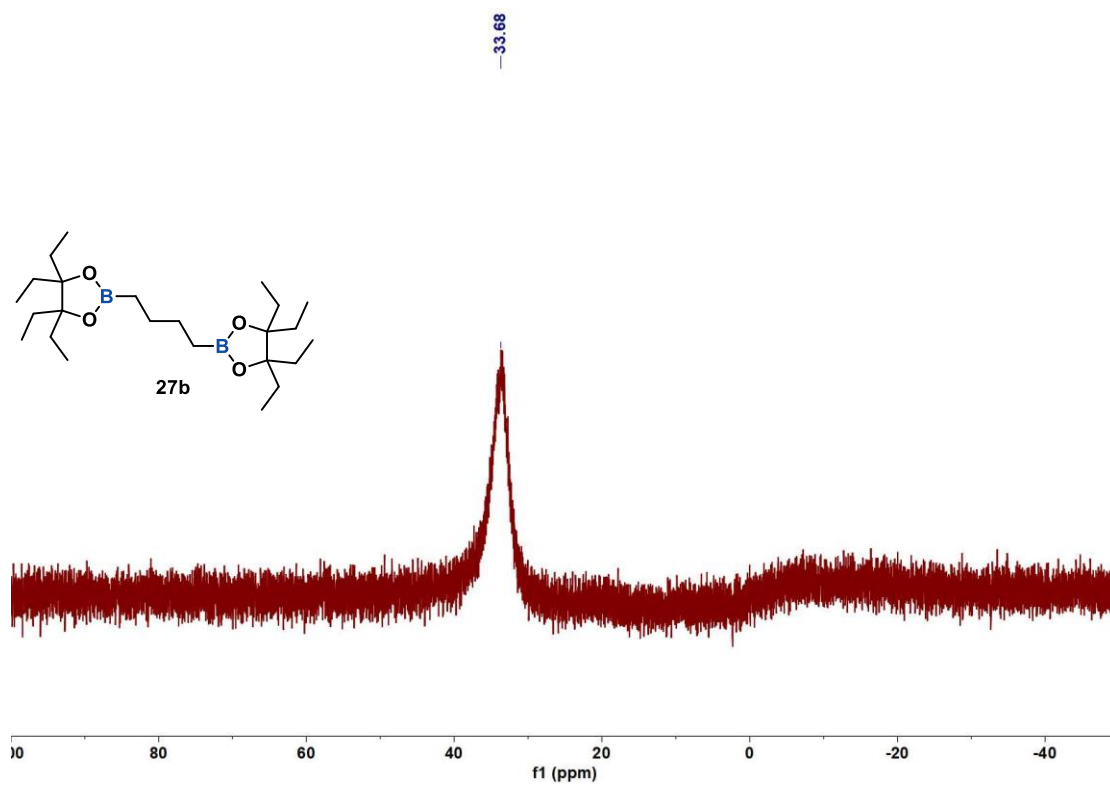

**Figure S169.**  $^{11}\text{B}\{^1\text{H}\}$  NMR spectrum of **27b** in  $\text{CDCl}_3$  at 298K

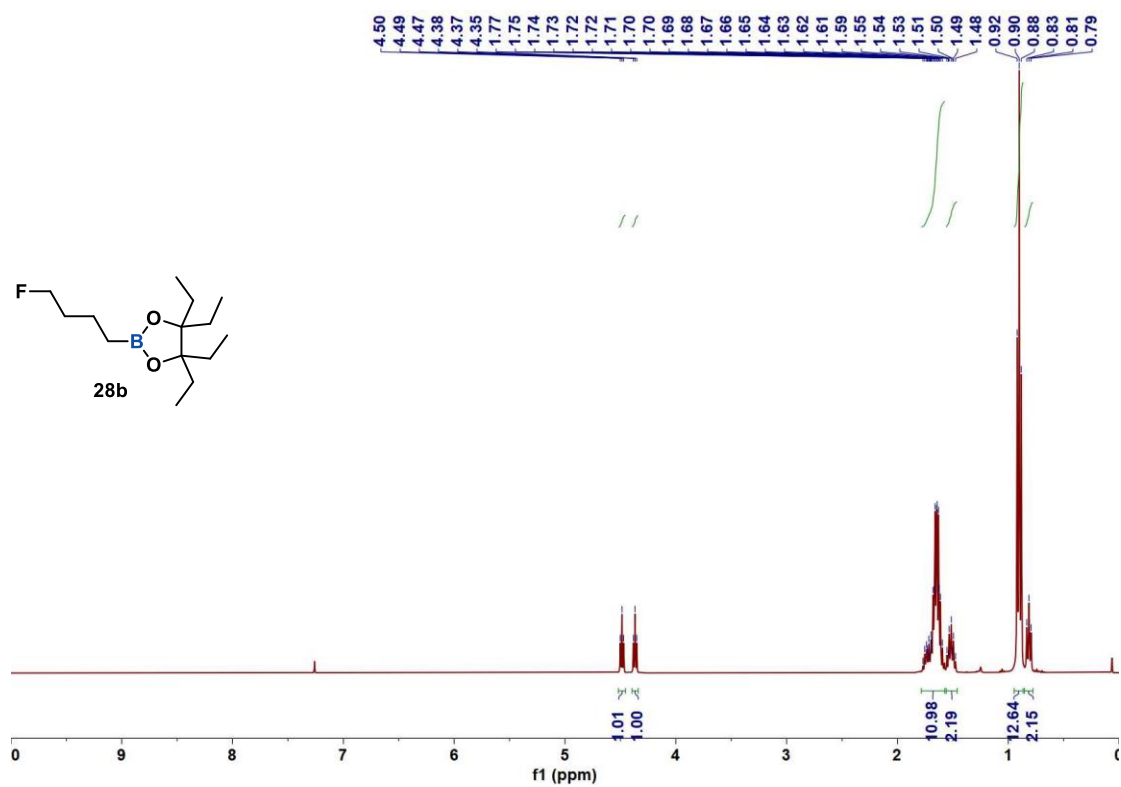

**Figure S170.** <sup>1</sup>H NMR spectrum of **28b** in CDCl<sub>3</sub> at 298K

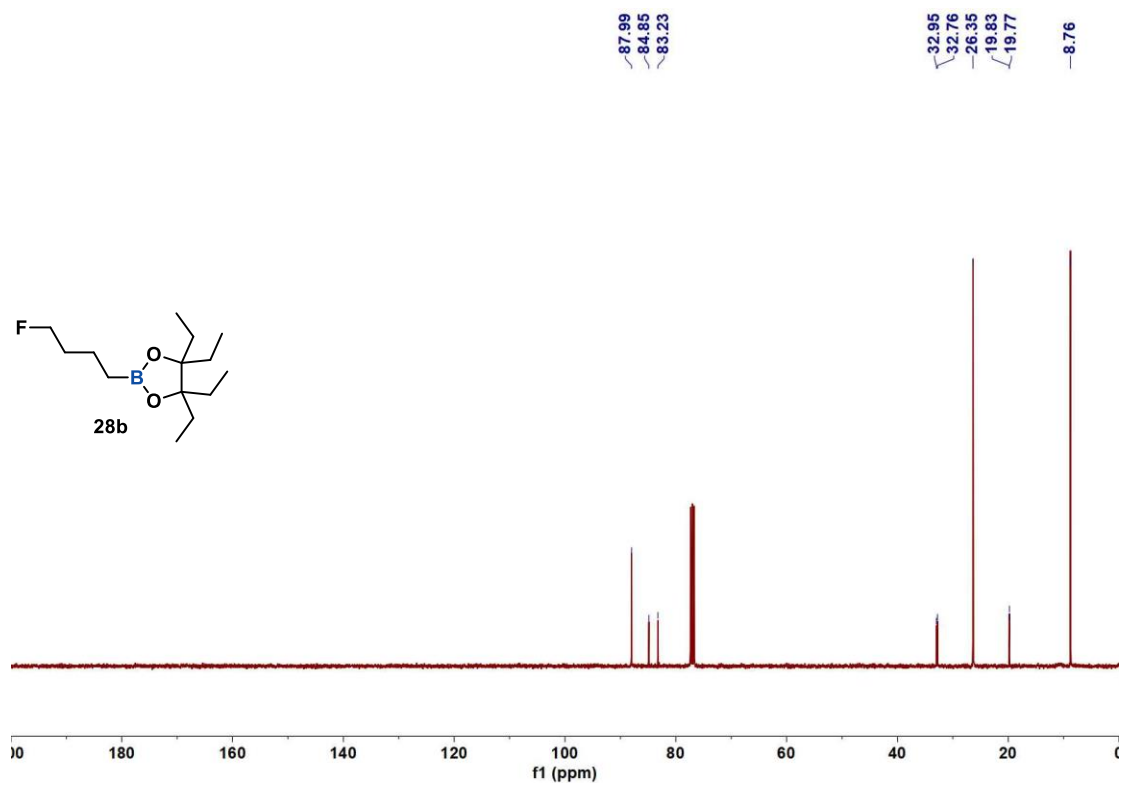

**Figure S171.**  $^{13}\text{C}\{^1\text{H}\}$  NMR spectrum of **28b** in  $\text{CDCl}_3$  at 298K

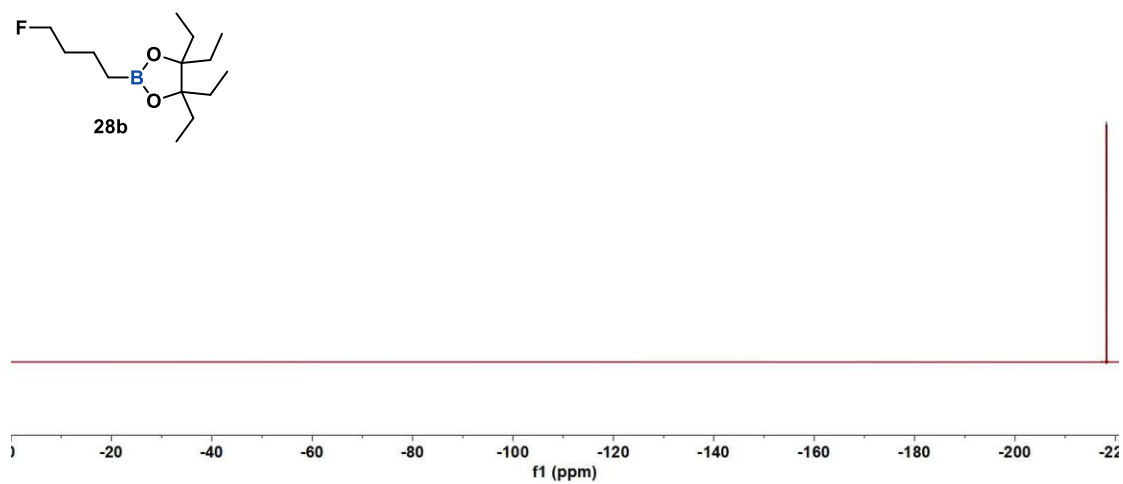

**Figure S172.**  $^{19}\text{F}$   $\{^1\text{H}\}$  NMR spectrum of **28b** in  $\text{CDCl}_3$  at 298K

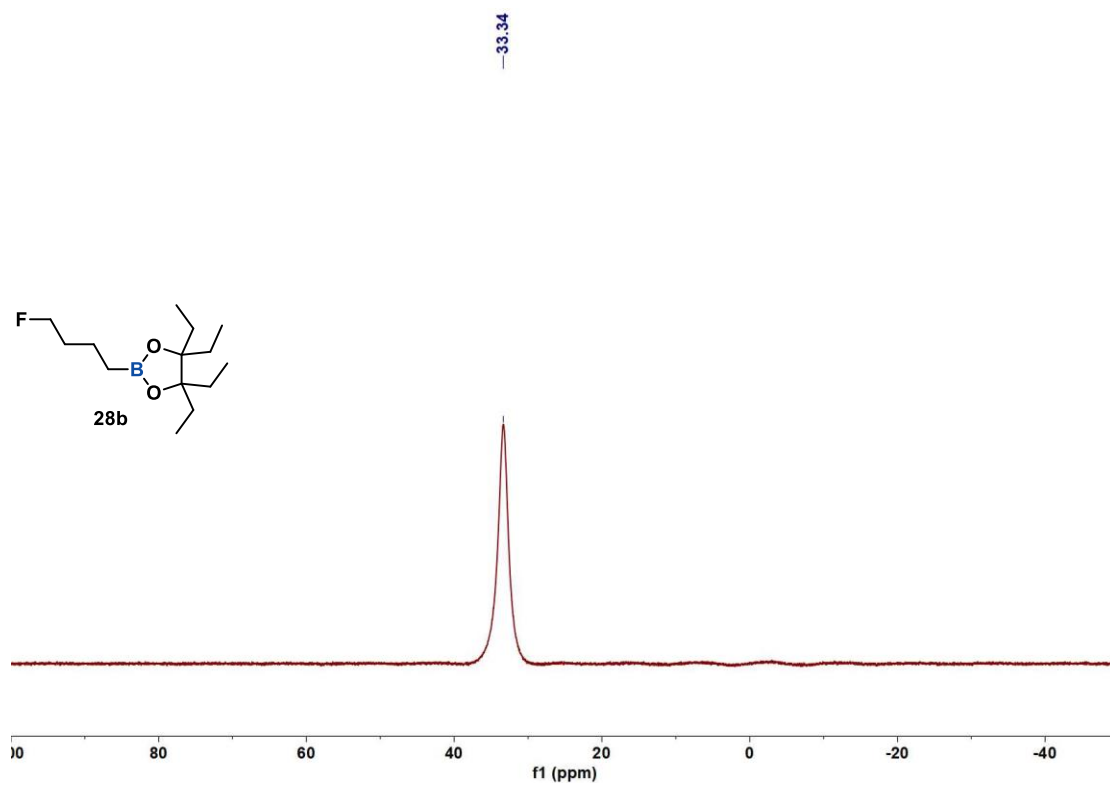

**Figure S173.**  $^{11}\text{B}\{^1\text{H}\}$  NMR spectrum of **28b** in  $\text{CDCl}_3$  at 298K

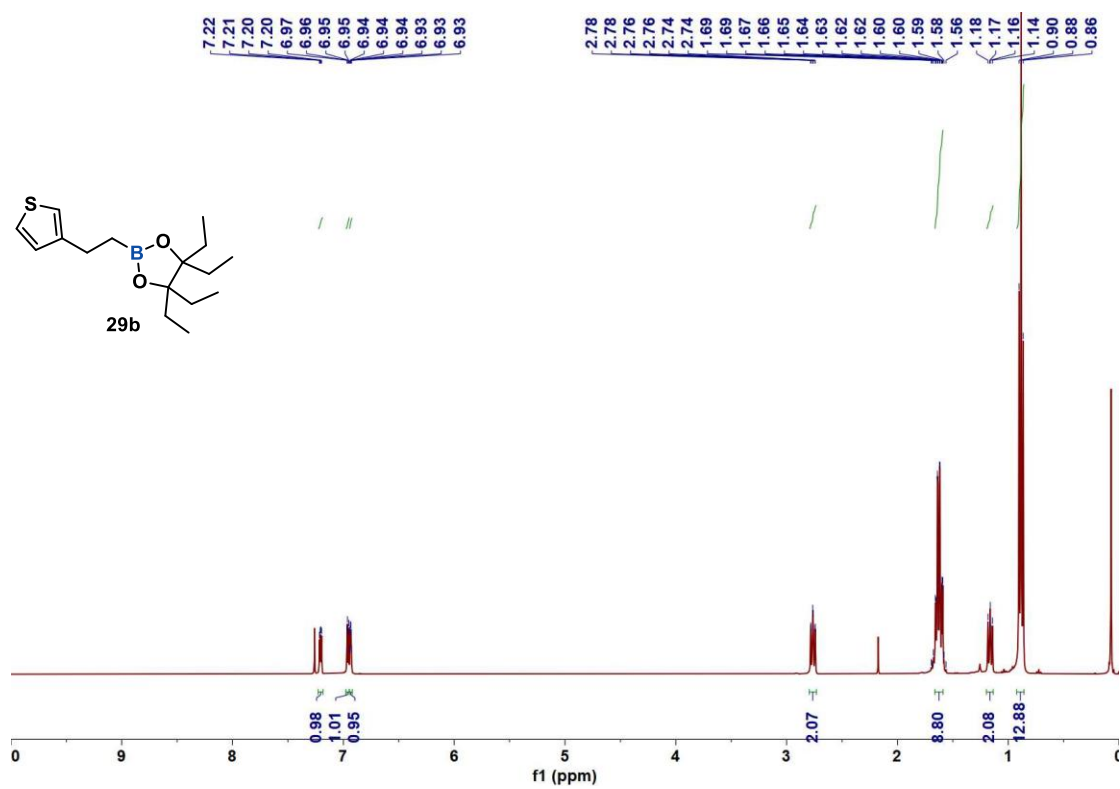

Figure S174. <sup>1</sup>H NMR spectrum of **29b** in CDCl<sub>3</sub> at 298K

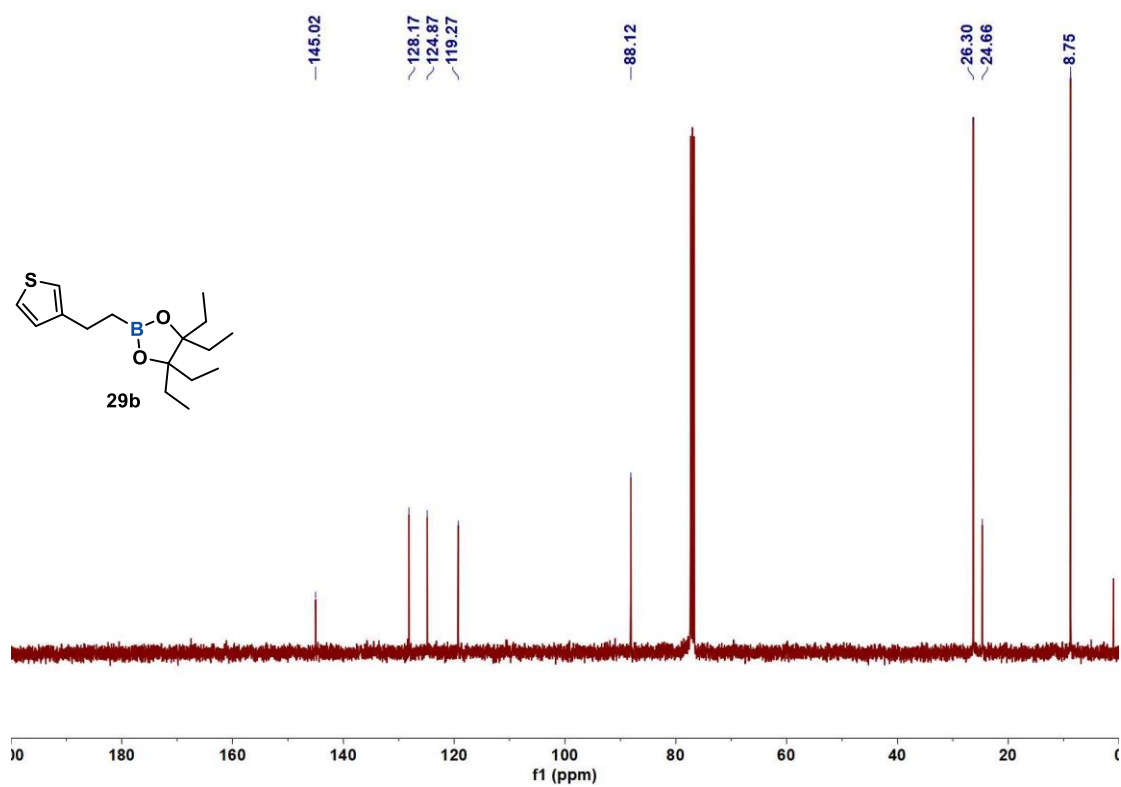

**Figure S175.**  $^{13}\text{C}\{^1\text{H}\}$  NMR spectrum of **29b** in  $\text{CDCl}_3$  at 298K



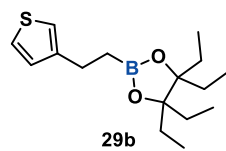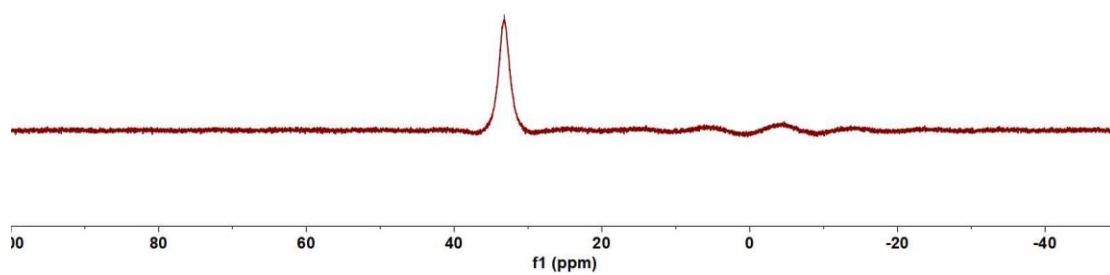

**Figure S176.**  $^{11}\text{B}\{^1\text{H}\}$  NMR spectrum of **29b** in  $\text{CDCl}_3$  at 298K

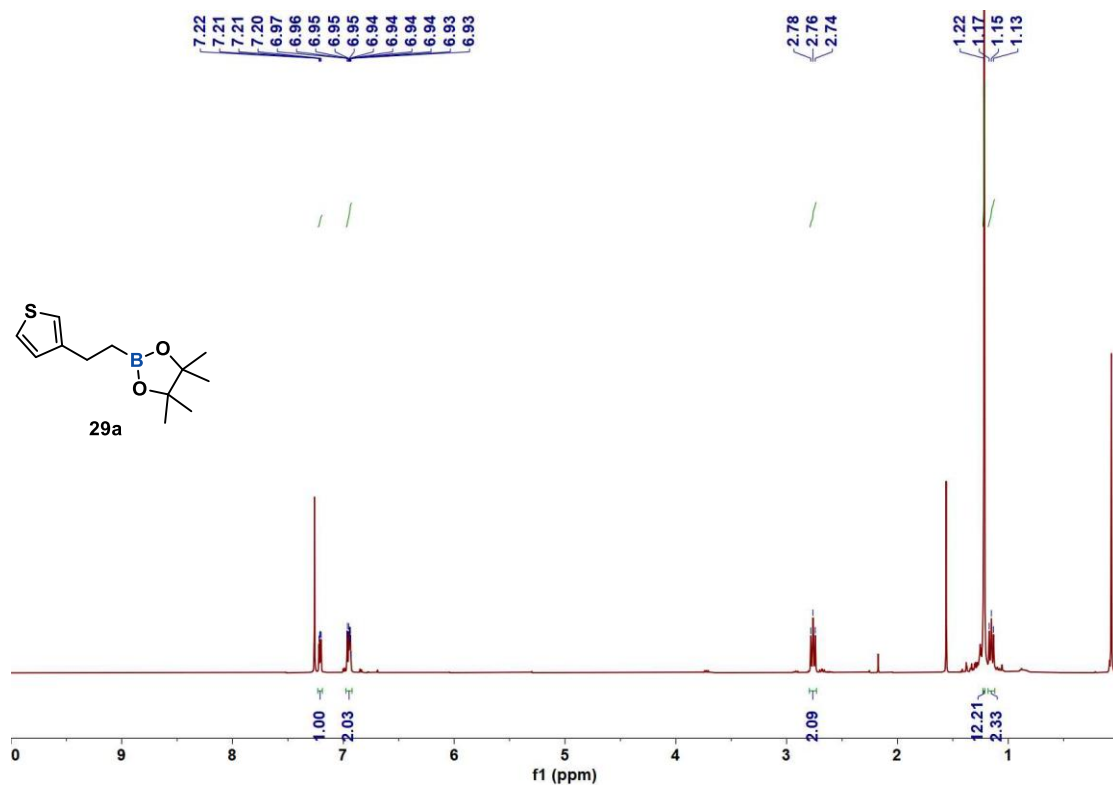

**Figure S177.** <sup>1</sup>H NMR spectrum of **29a** in CDCl<sub>3</sub> at 298K

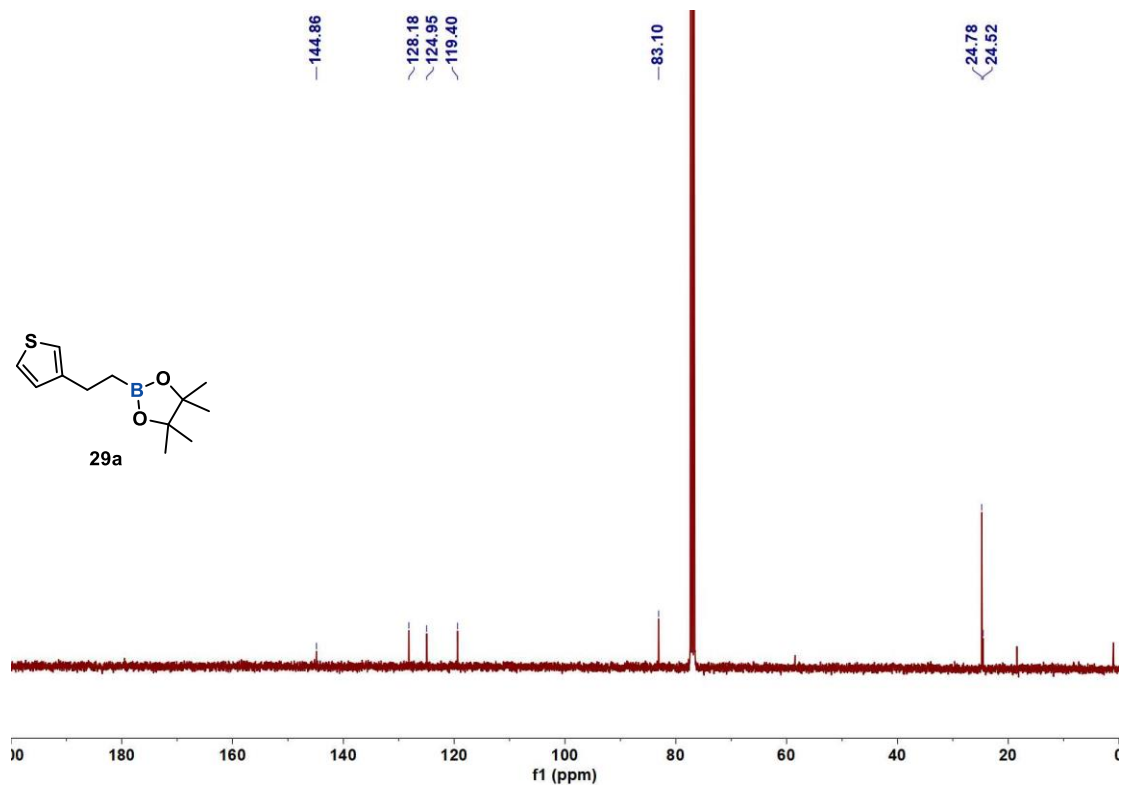

**Figure S178.**  $^{13}\text{C}\{^1\text{H}\}$  NMR spectrum of **29a** in  $\text{CDCl}_3$  at 298K

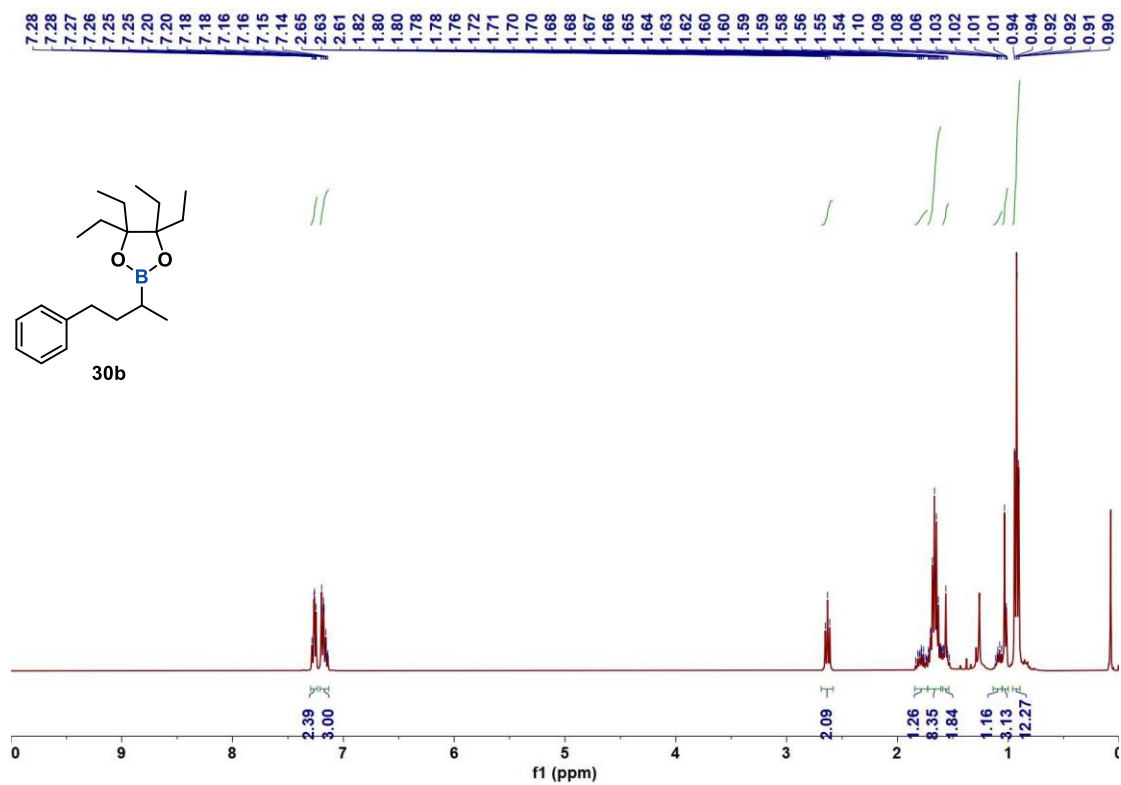

**Figure S179.** <sup>1</sup>H NMR spectrum of **30b** in CDCl<sub>3</sub> at 298K

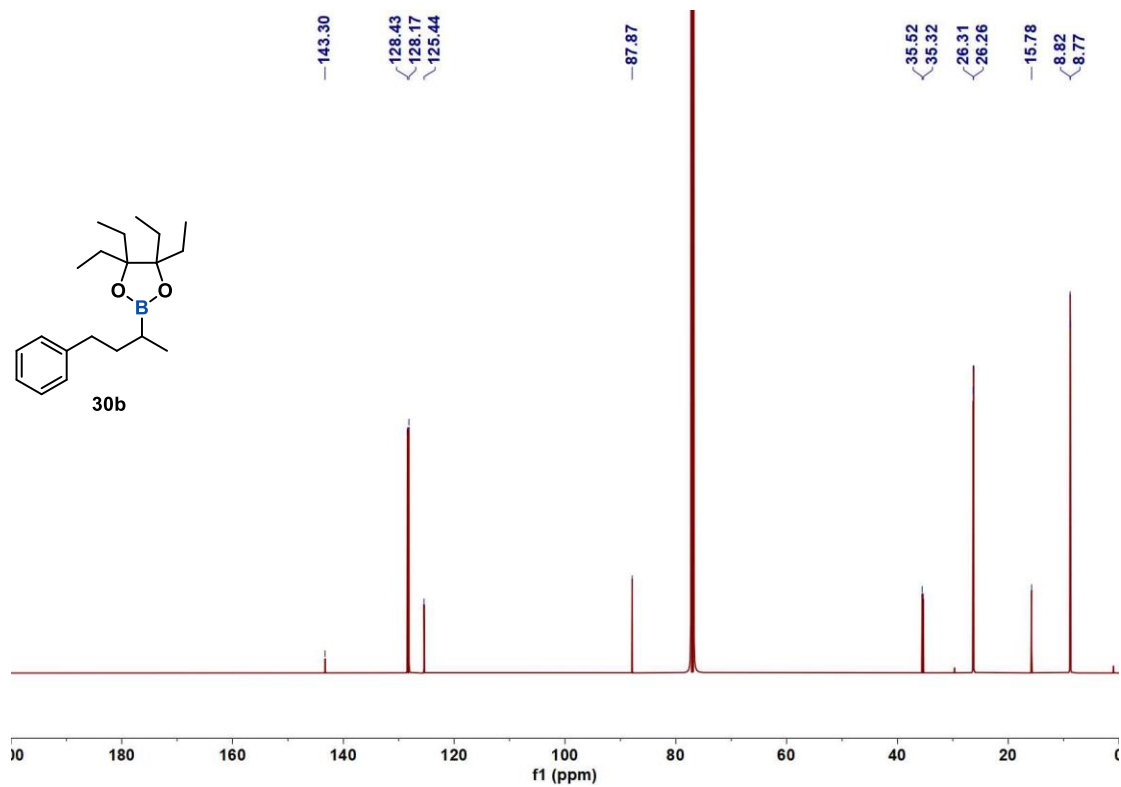

**Figure S180.**  $^{13}\text{C}\{^1\text{H}\}$  NMR spectrum of **30b** in  $\text{CDCl}_3$  at 298K

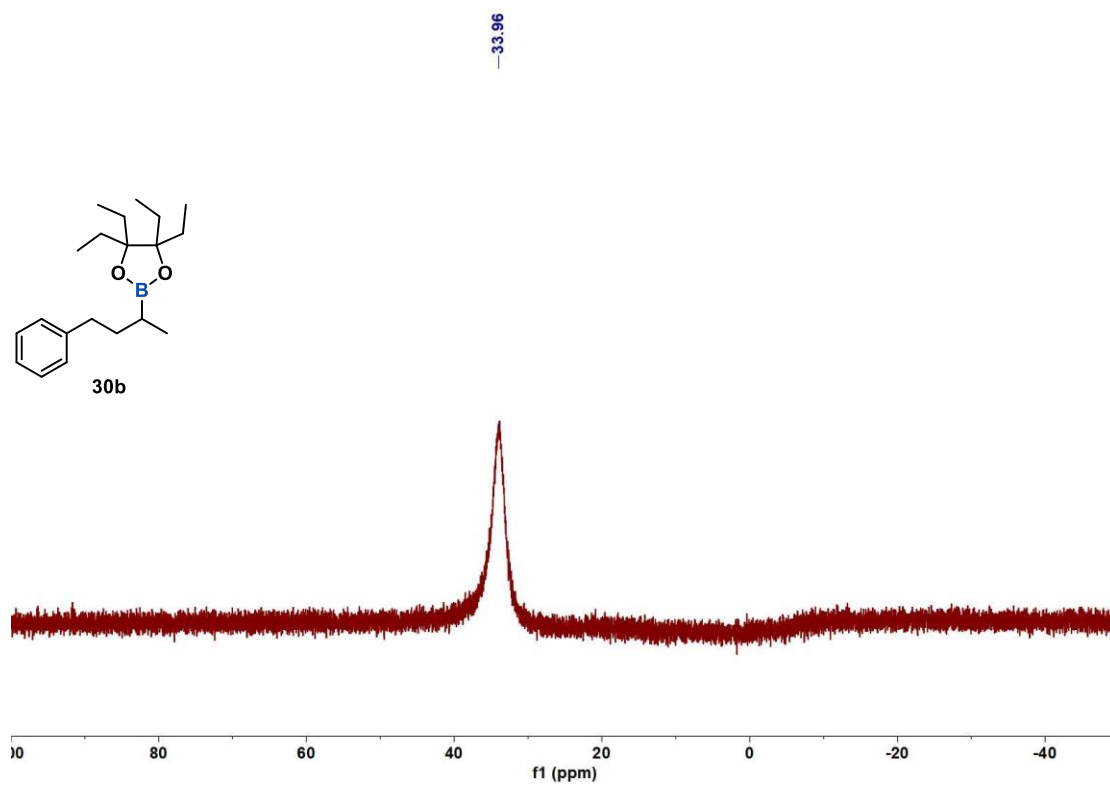

**Figure S181.**  $^{11}\text{B}\{^1\text{H}\}$  NMR spectrum of **30b** in  $\text{CDCl}_3$  at 298K



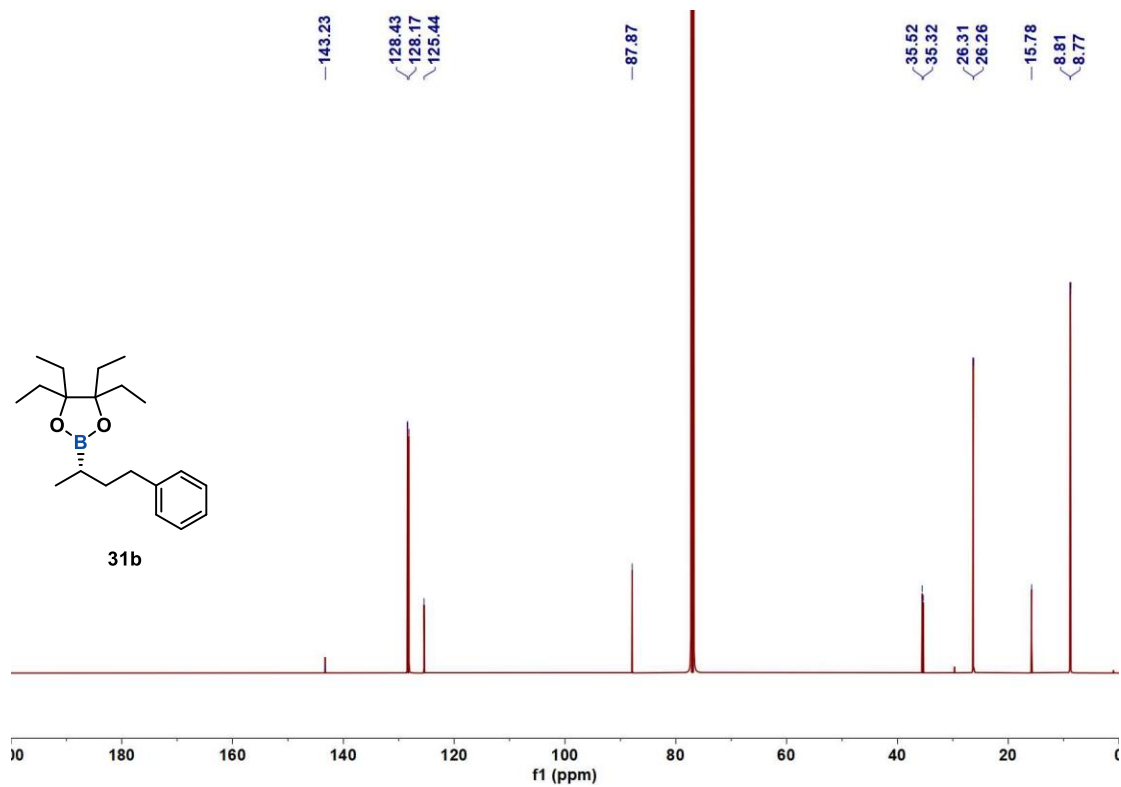

**Figure S183.**  $^{13}\text{C}\{^1\text{H}\}$  NMR spectrum of **31b** in  $\text{CDCl}_3$  at 298K



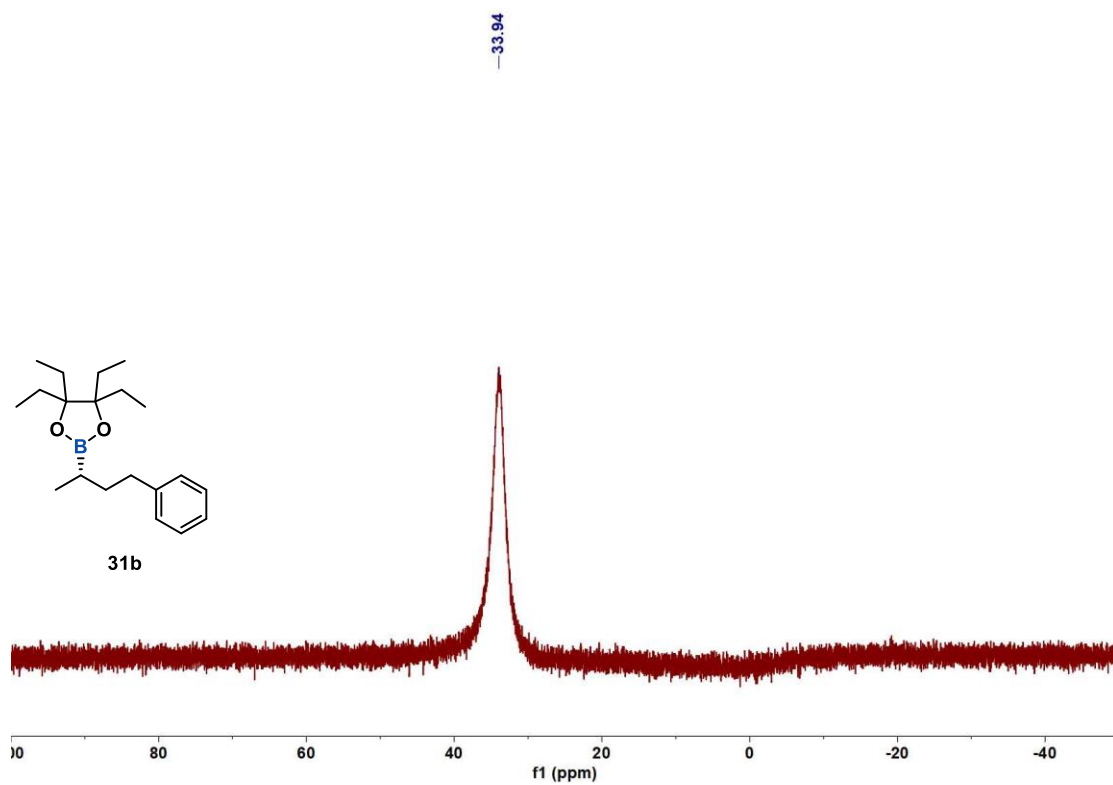

**Figure S184.**  $^{11}\text{B}\{^1\text{H}\}$  NMR spectrum of **31b** in  $\text{CDCl}_3$  at 298K

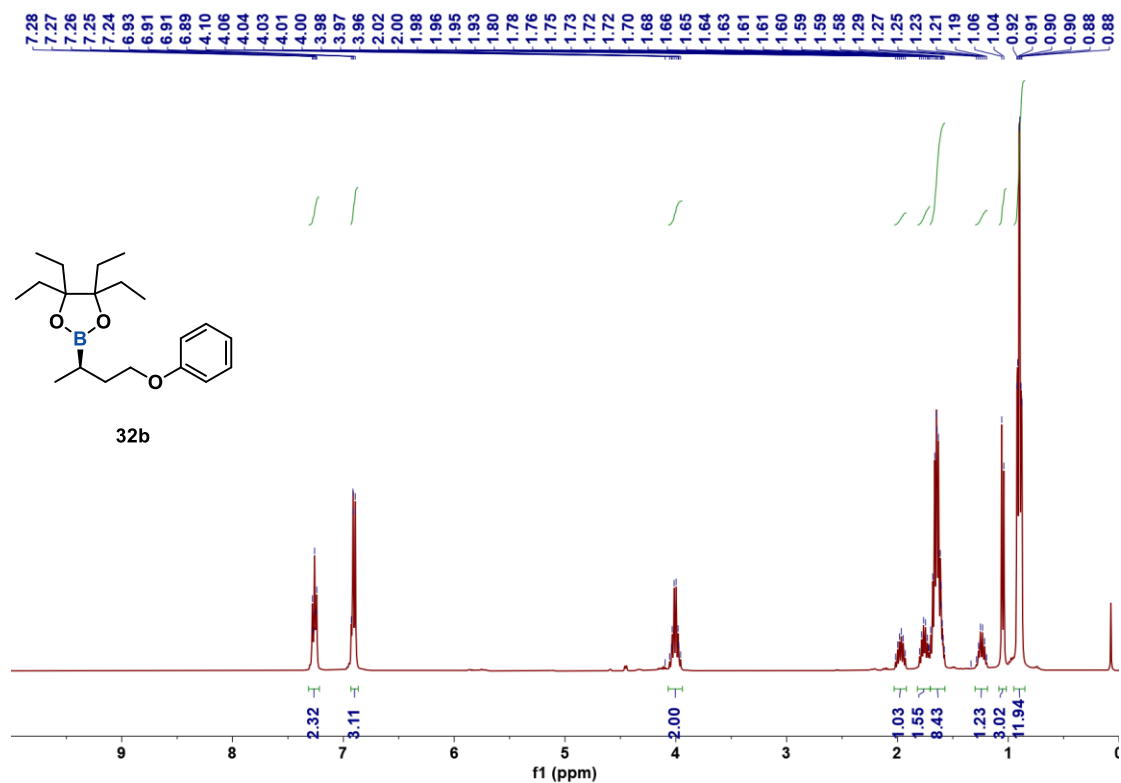

**Figure S185.** <sup>1</sup>H NMR spectrum of **32b** in CDCl<sub>3</sub> at 298K

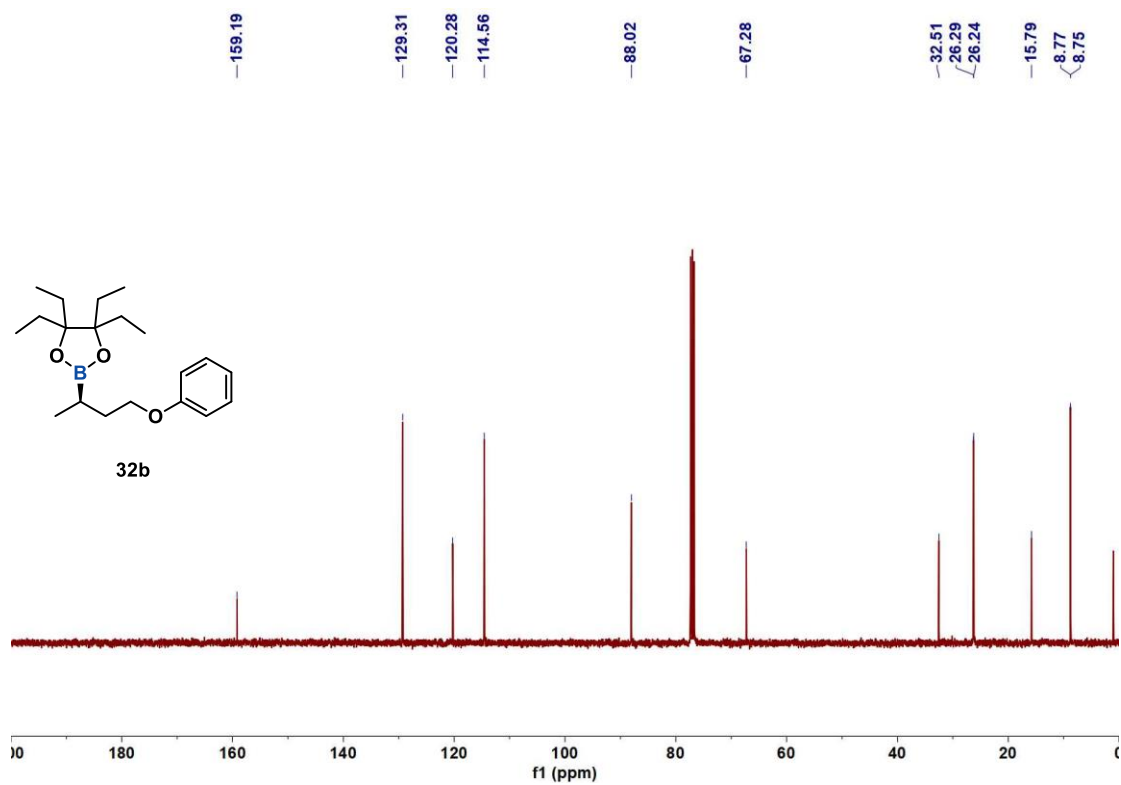

**Figure S186.**  $^{13}\text{C}\{^1\text{H}\}$  NMR spectrum of **32b** in  $\text{CDCl}_3$  at 298K

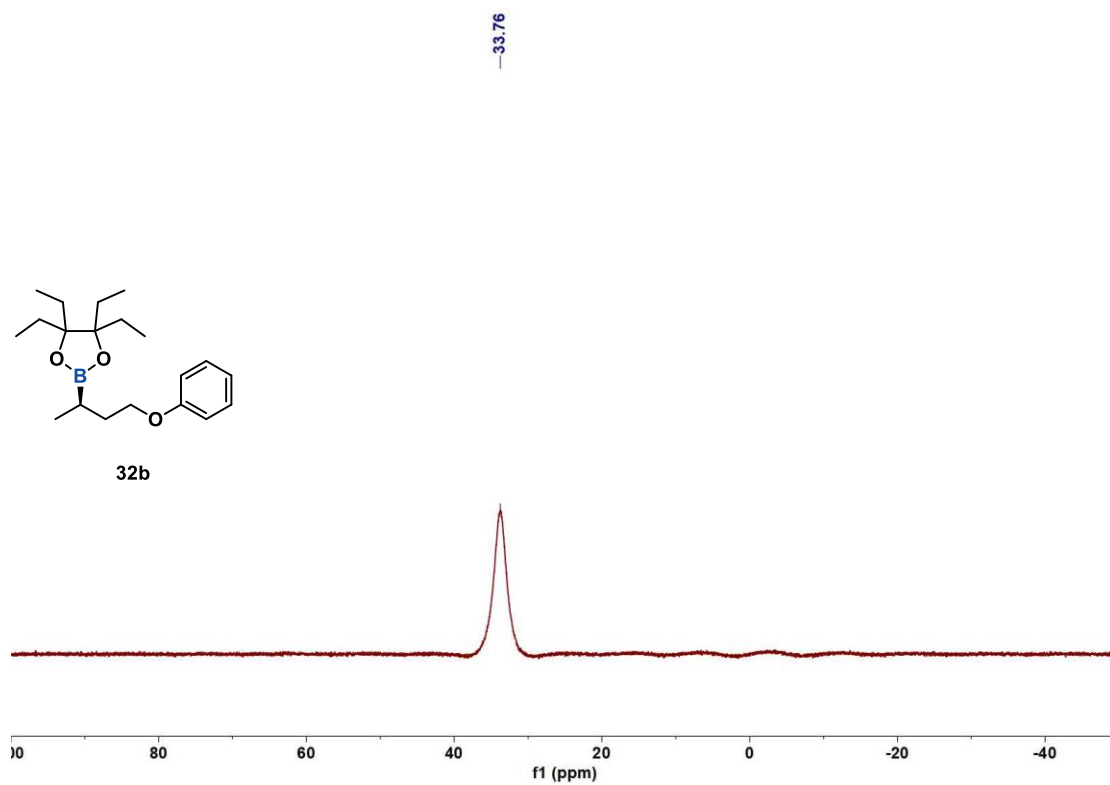

**Figure S187.**  $^{11}\text{B}\{^1\text{H}\}$  NMR spectrum of **32b** in  $\text{CDCl}_3$  at 298K

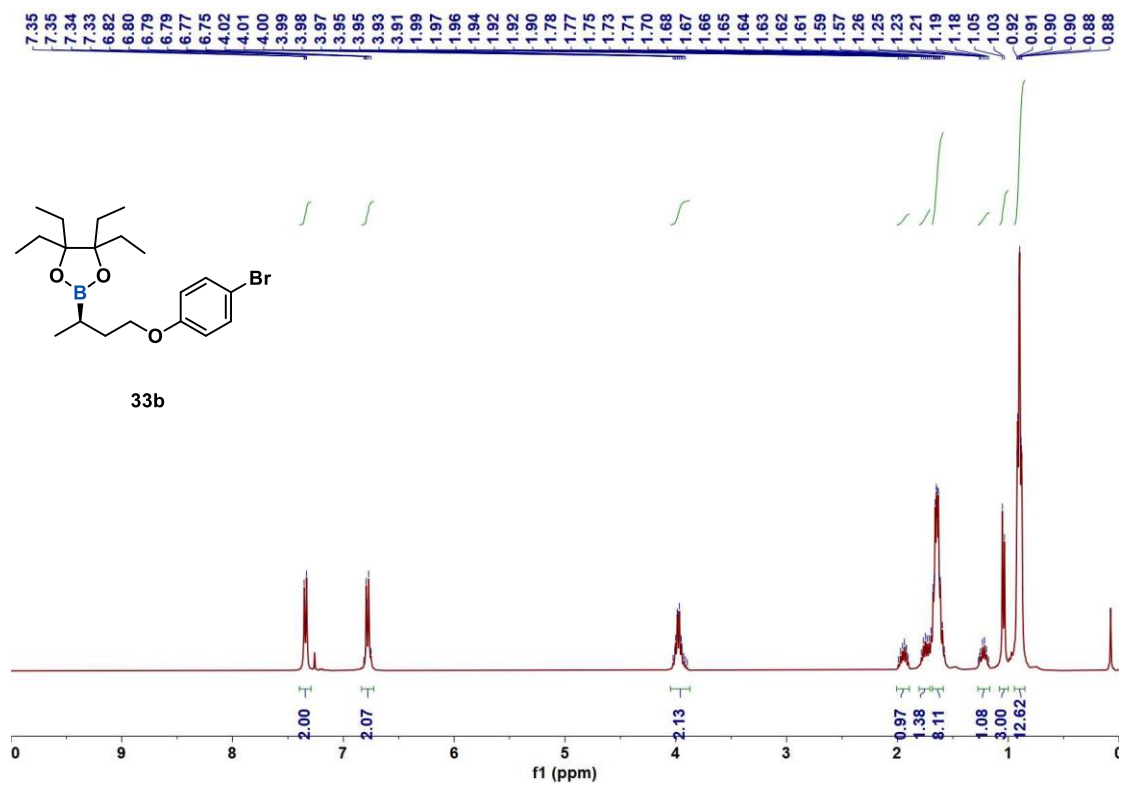

**Figure S188.** <sup>1</sup>H NMR spectrum of **33b** in CDCl<sub>3</sub> at 298K

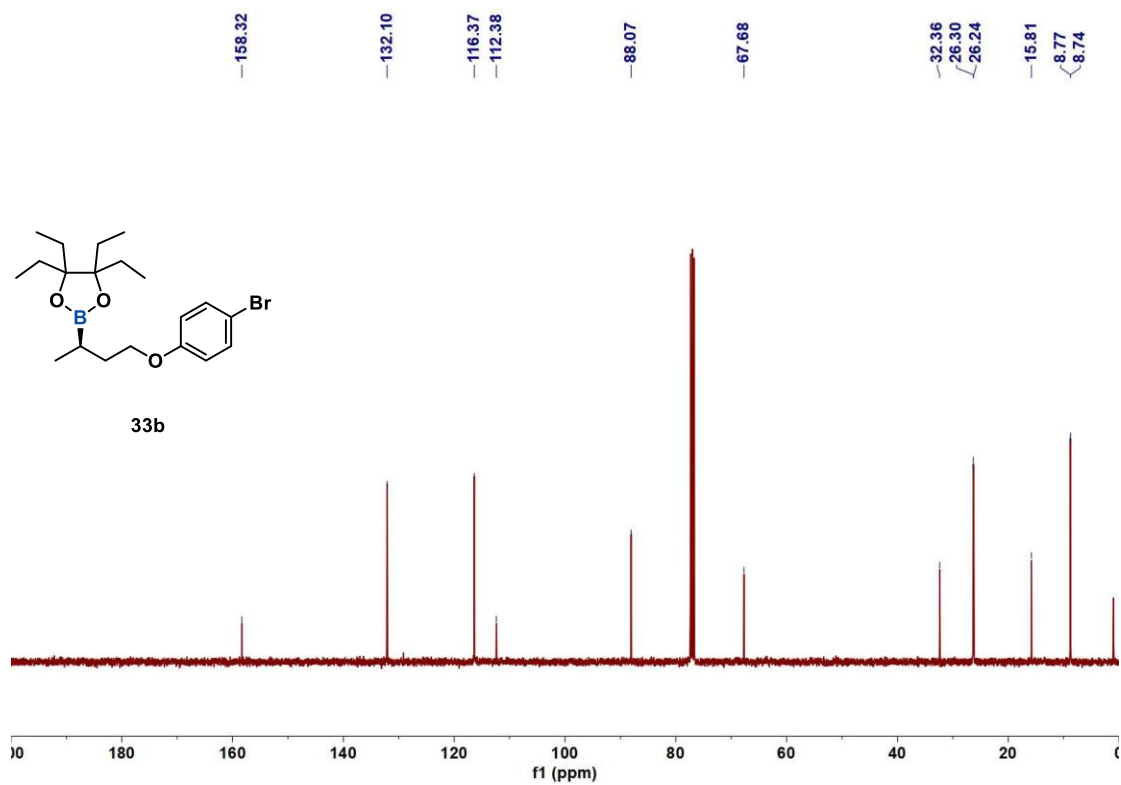

**Figure S189.**  $^{13}\text{C}\{^1\text{H}\}$  NMR spectrum of **33b** in  $\text{CDCl}_3$  at 298K

-33.74

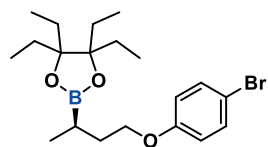

33b

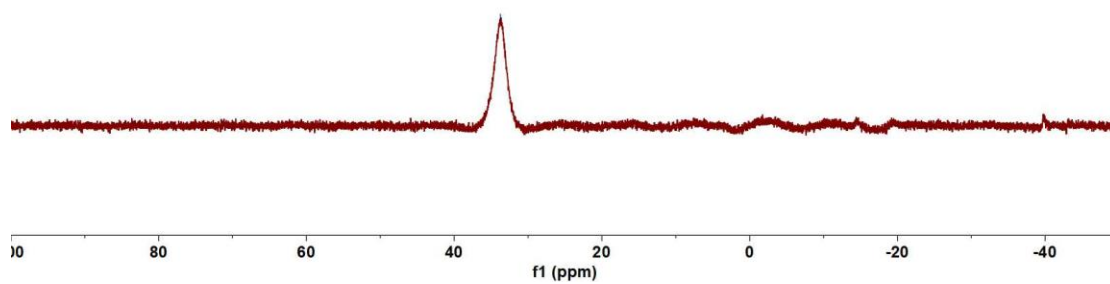

Figure S190.  $^{11}\text{B}\{^1\text{H}\}$  NMR spectrum of **33b** in  $\text{CDCl}_3$  at 298K

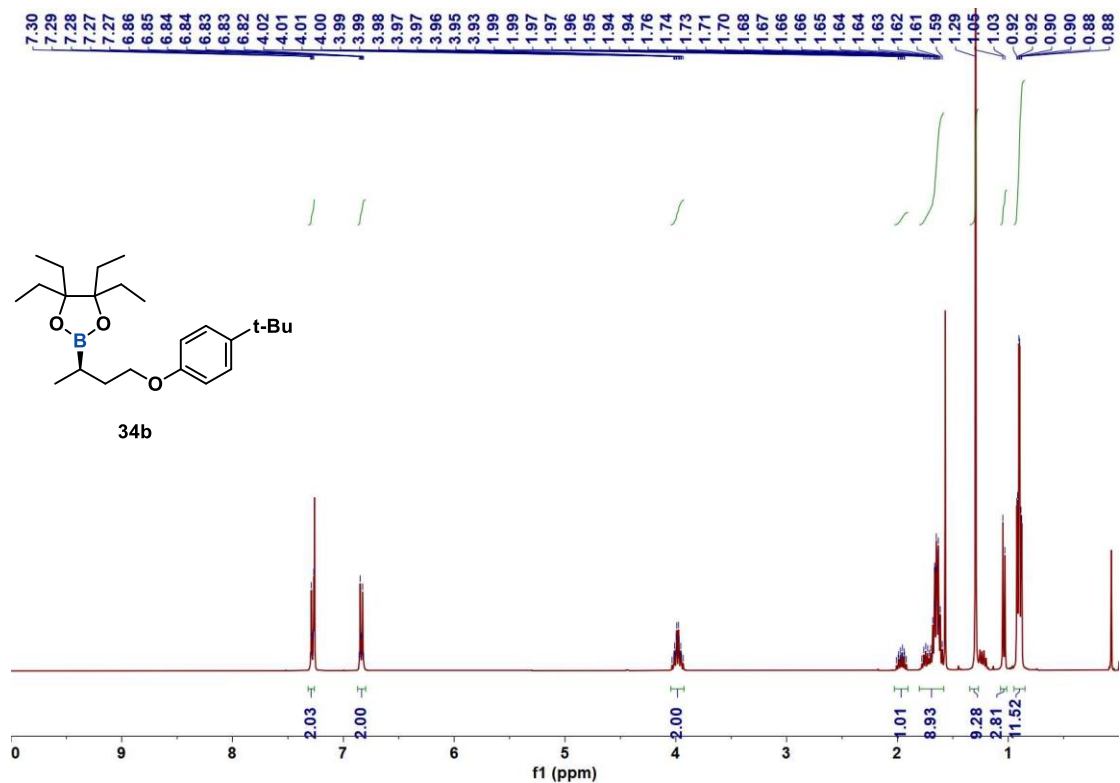

**Figure S191.** <sup>1</sup>H NMR spectrum of **34b** in CDCl<sub>3</sub> at 298K



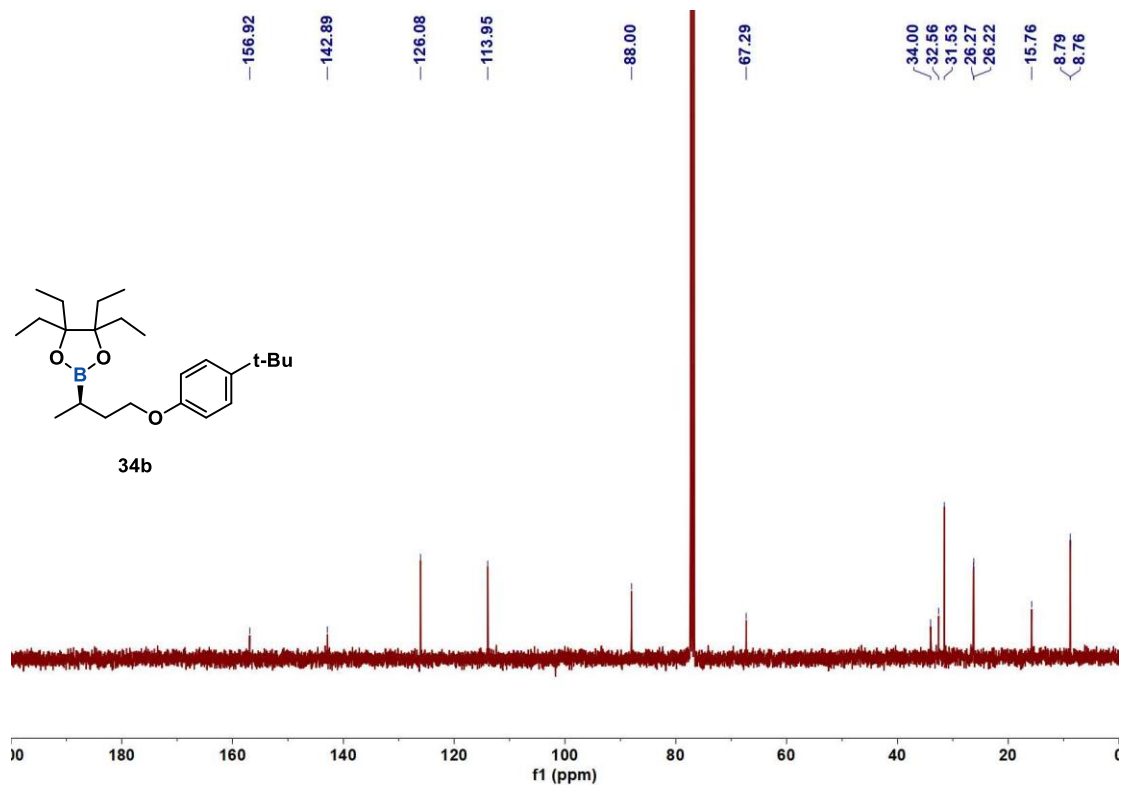

**Figure S192.**  $^{13}\text{C}\{^1\text{H}\}$  NMR spectrum of **34b** in  $\text{CDCl}_3$  at 298K

-33.67

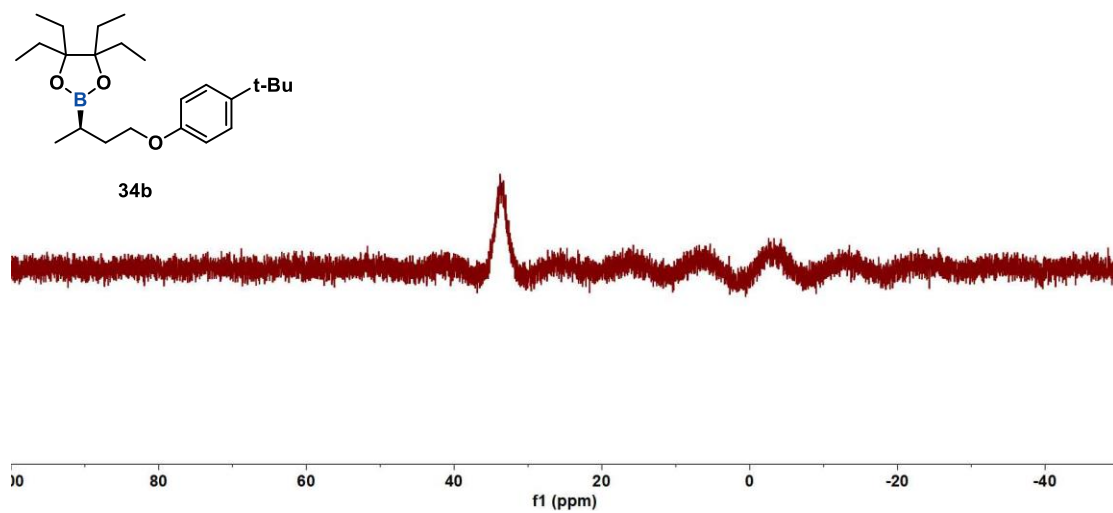

**Figure S193.**  $^{11}\text{B}\{^1\text{H}\}$  NMR spectrum of **34b** in  $\text{CDCl}_3$  at 298K

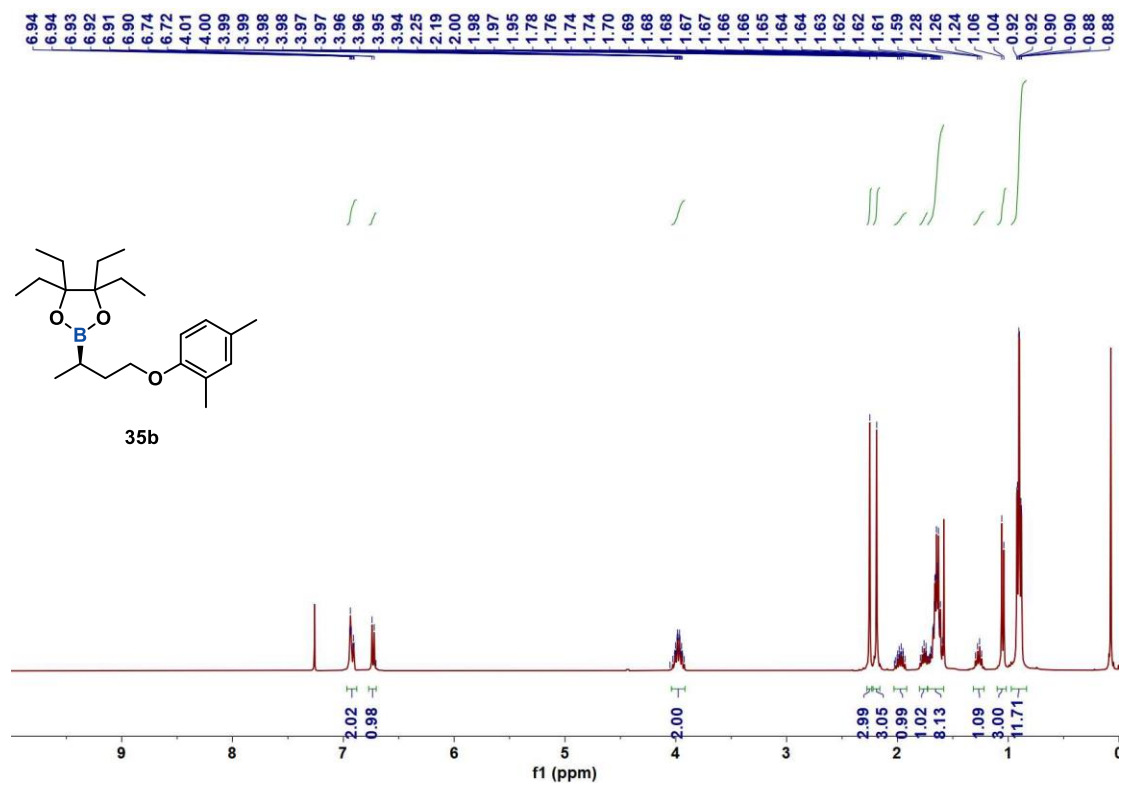

**Figure S194.**  $^1\text{H}$  NMR spectrum of **35b** in  $\text{CDCl}_3$  at 298K

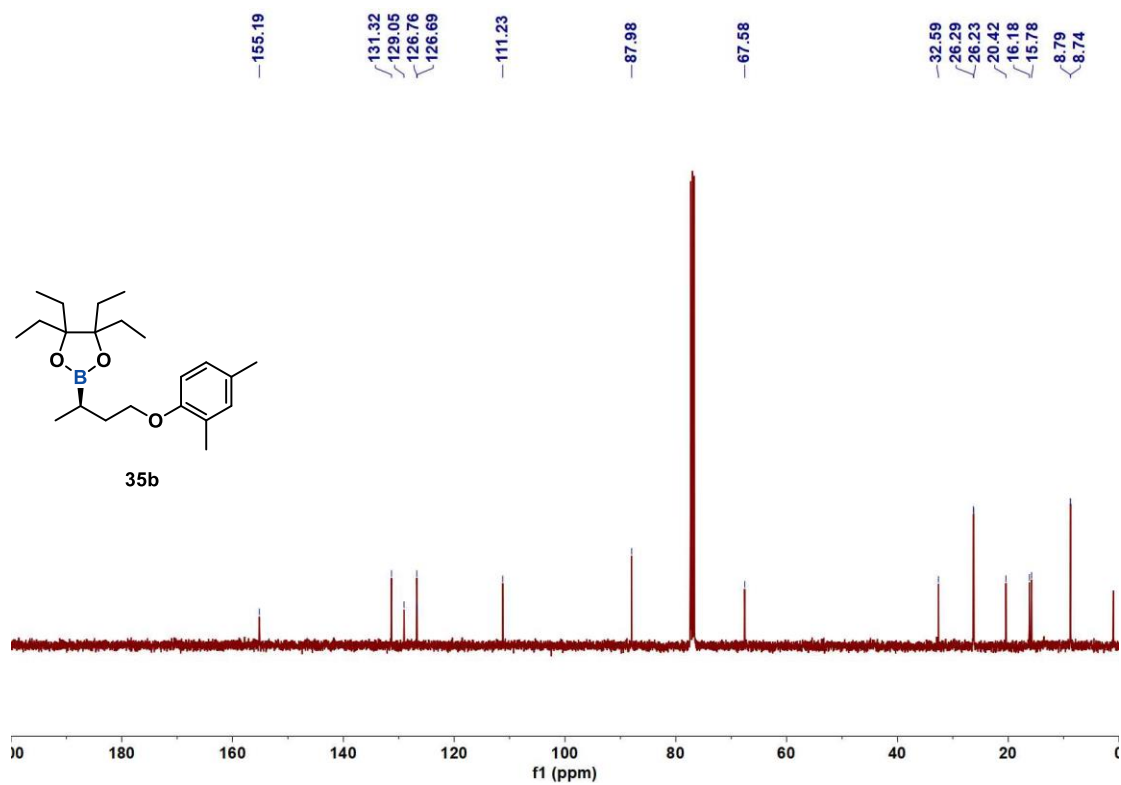

**Figure S195.**  $^{13}\text{C}\{^1\text{H}\}$  NMR spectrum of **35b** in  $\text{CDCl}_3$  at 298K

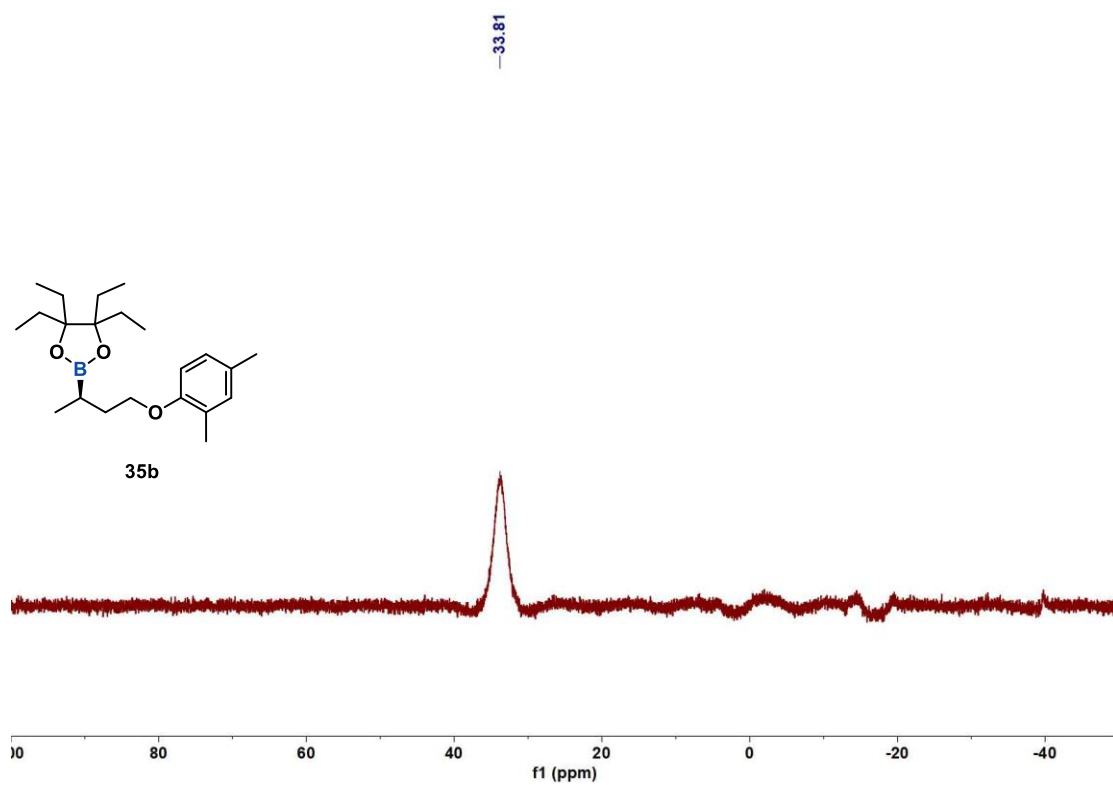

**Figure S196.**  $^{11}\text{B}\{^1\text{H}\}$  NMR spectrum of **35b** in  $\text{CDCl}_3$  at 298K

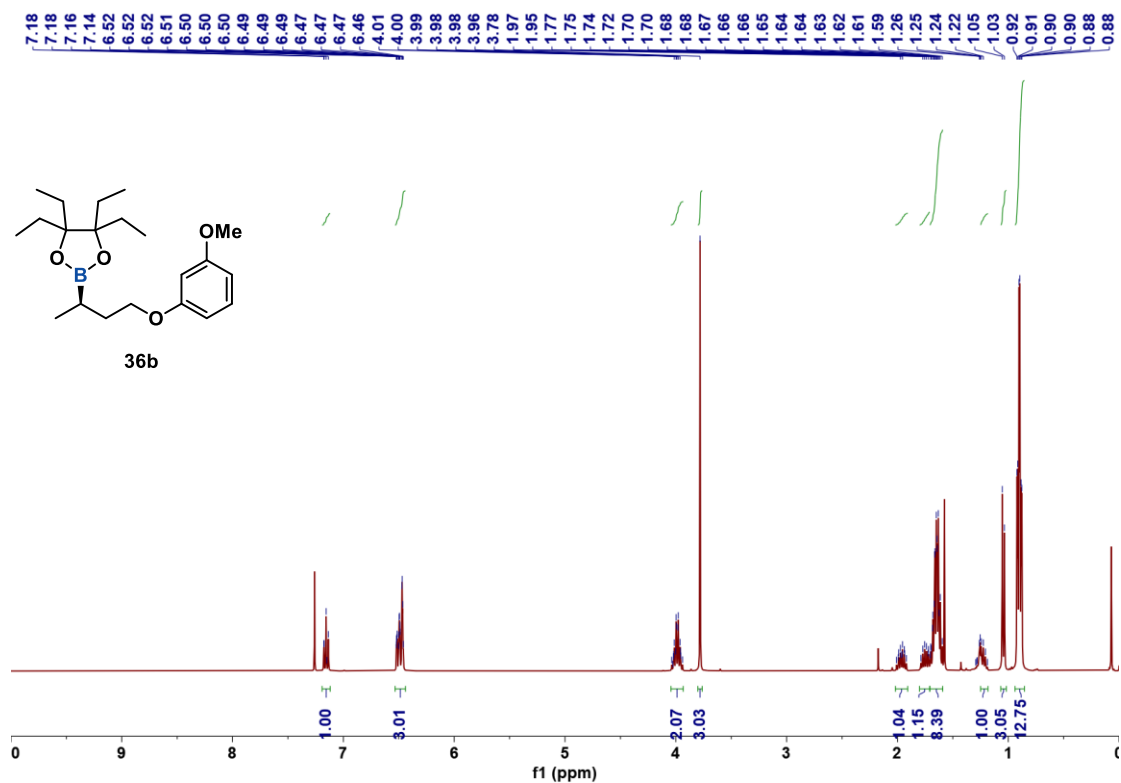

**Figure S197.** <sup>1</sup>H NMR spectrum of **36b** in CDCl<sub>3</sub> at 298K

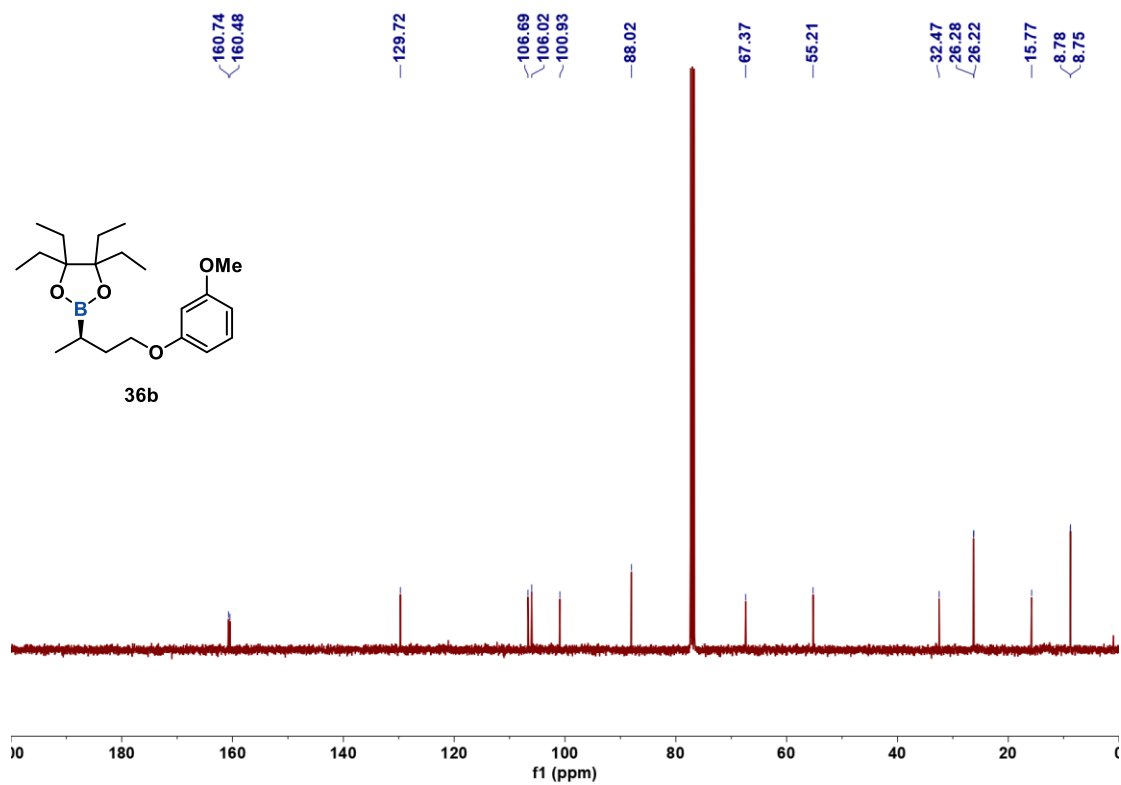

**Figure S198.**  $^{13}\text{C}\{^1\text{H}\}$  NMR spectrum of **36b** in  $\text{CDCl}_3$  at 298K

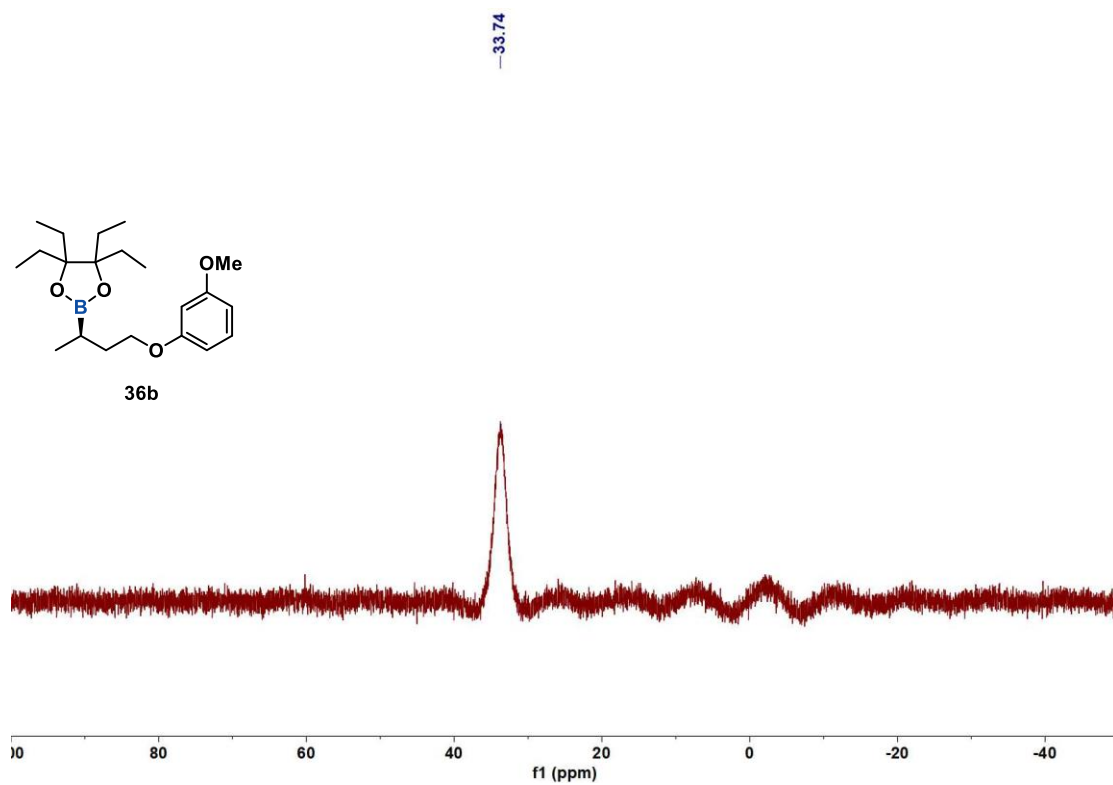

**Figure S199.**  $^{11}\text{B}\{^1\text{H}\}$  NMR spectrum of **36b** in  $\text{CDCl}_3$  at 298K



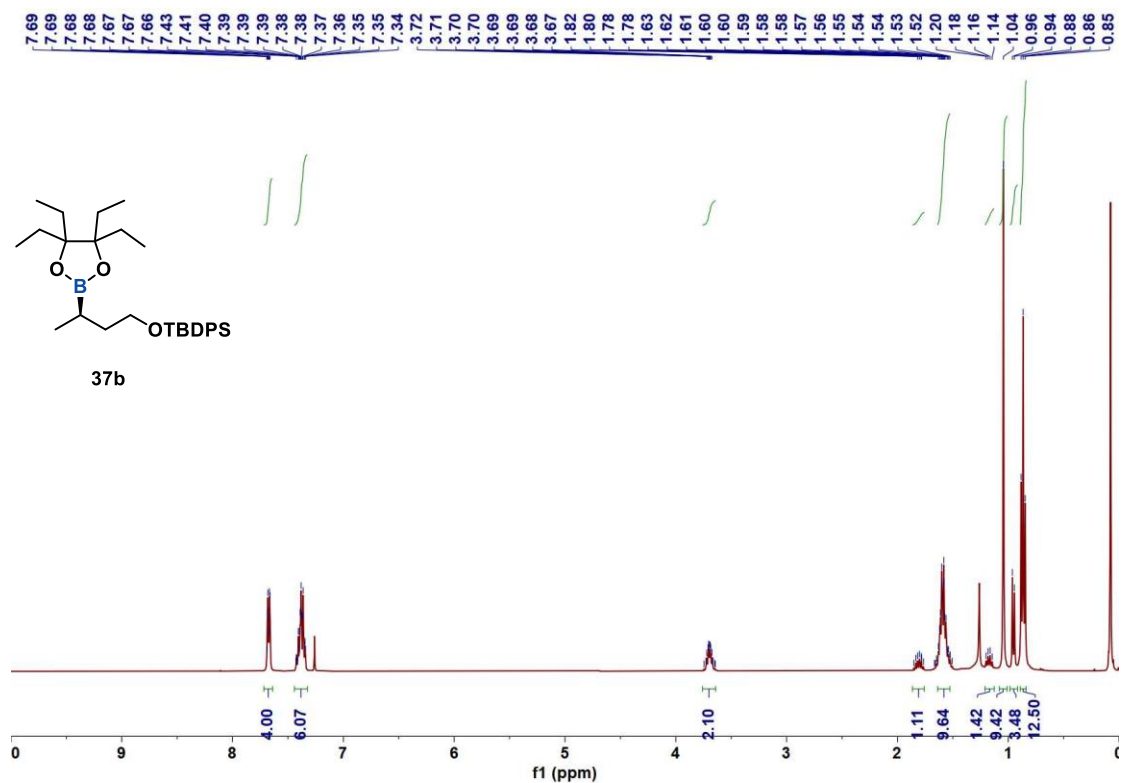

**Figure S200.**  $^1\text{H}$  NMR spectrum of **37b** in  $\text{CDCl}_3$  at 298K

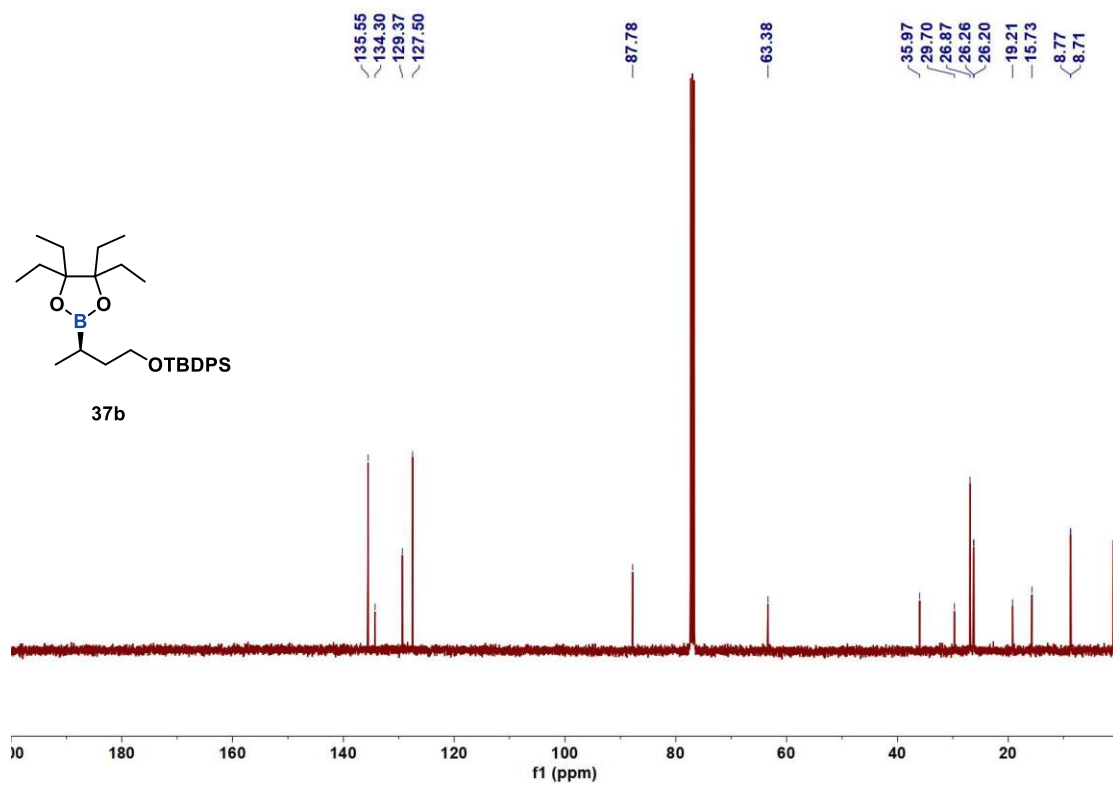

**Figure S201.**  $^{13}\text{C}\{^1\text{H}\}$  NMR spectrum of **37b** in  $\text{CDCl}_3$  at 298K

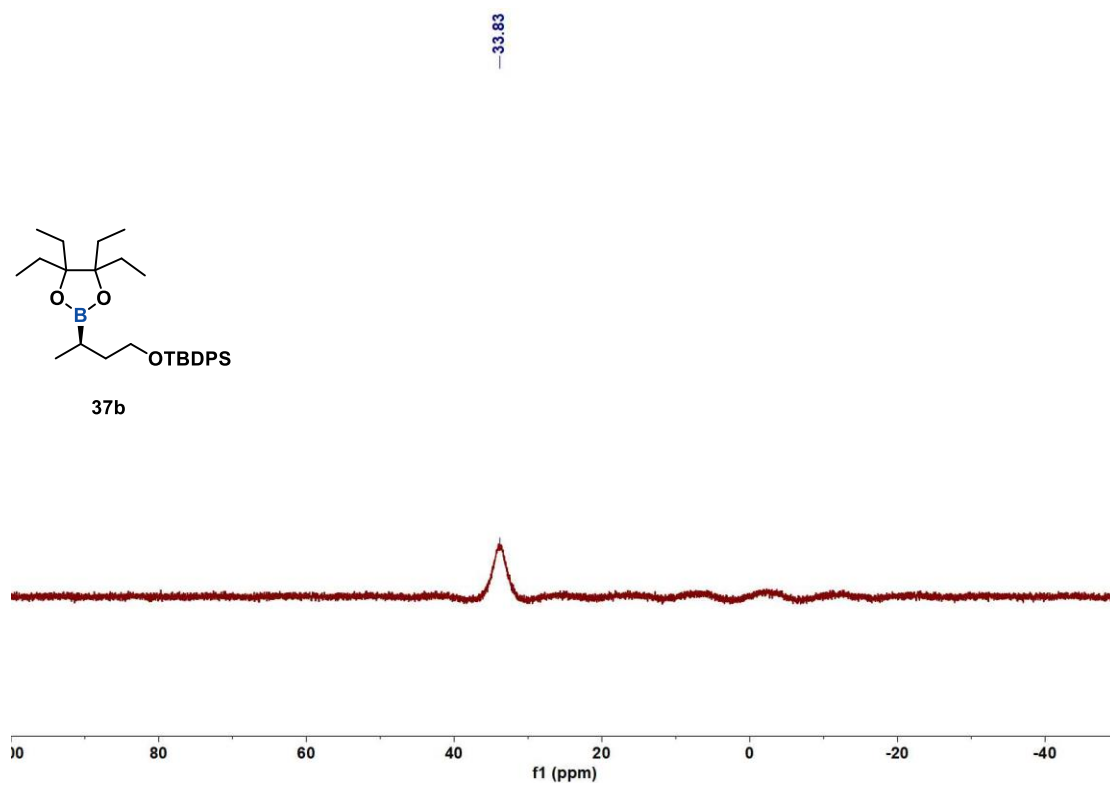

**Figure S202.**  $^{11}\text{B}\{^1\text{H}\}$  NMR spectrum of **37b** in  $\text{CDCl}_3$  at 298K

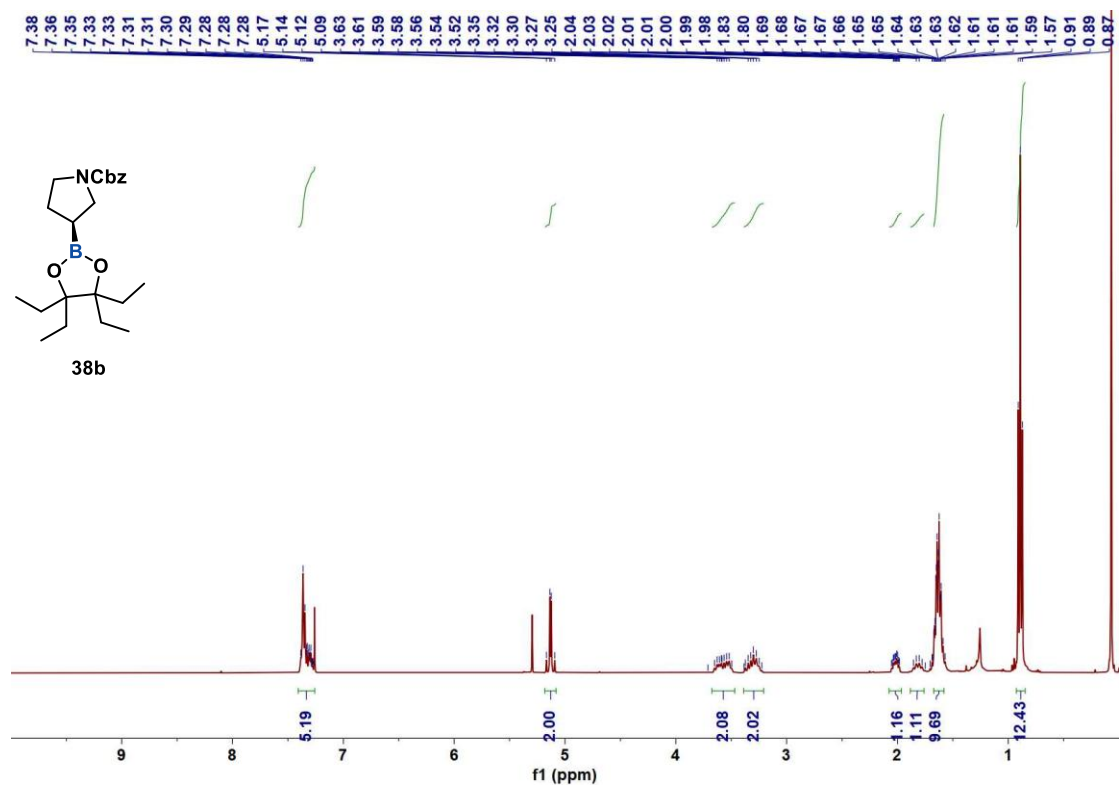

Figure S203. <sup>1</sup>H NMR spectrum of **38b** in CDCl<sub>3</sub> at 298K

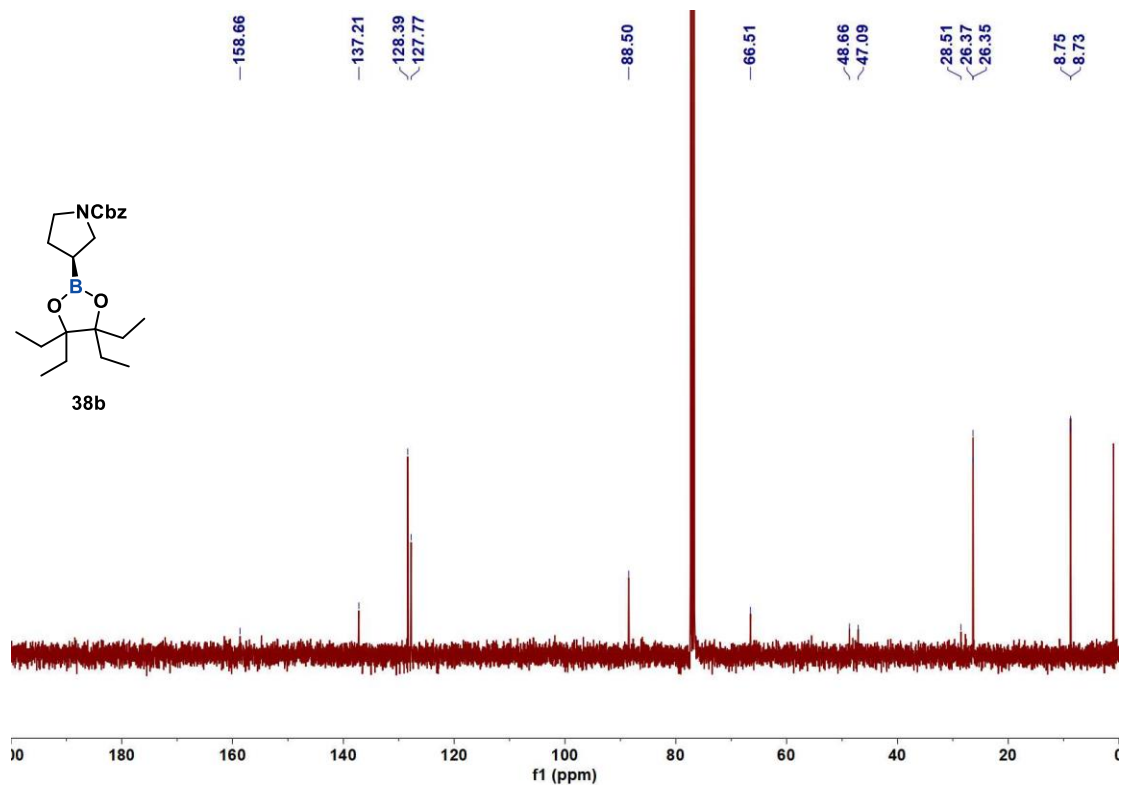

**Figure S204.**  $^{13}\text{C}\{^1\text{H}\}$  NMR spectrum of **38b** in  $\text{CDCl}_3$  at 298K

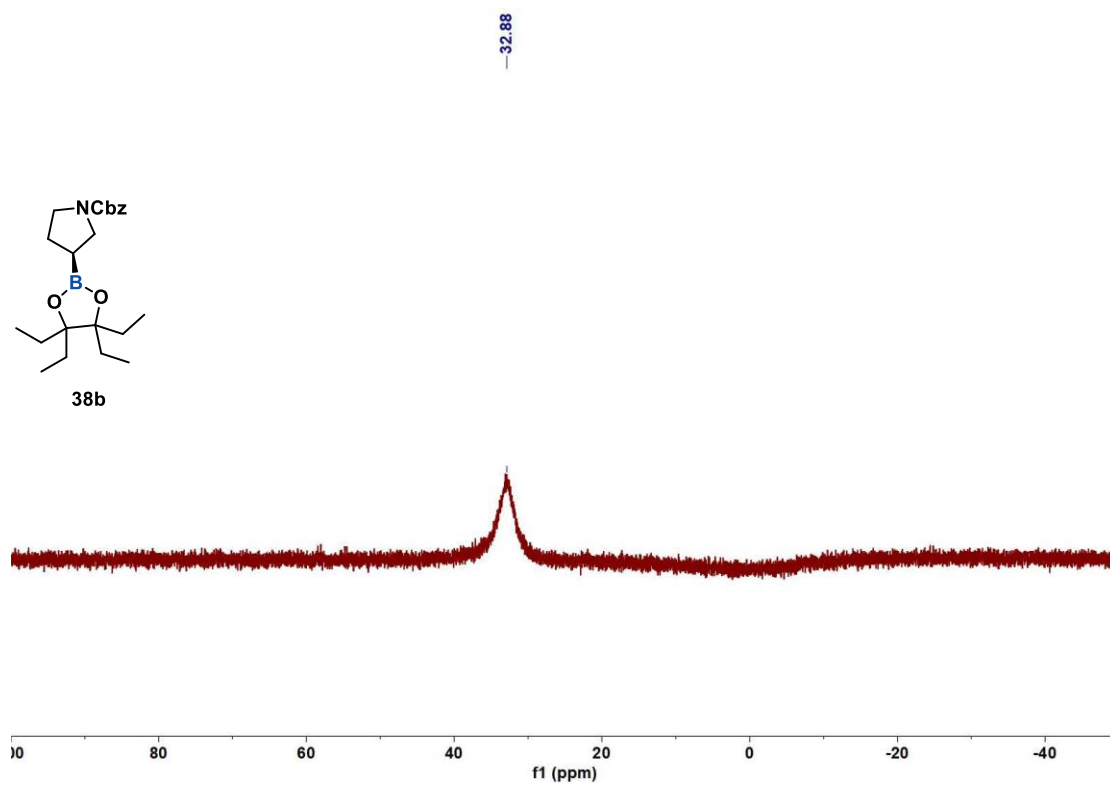

**Figure S205.**  $^{11}\text{B}\{^1\text{H}\}$  NMR spectrum of **38b** in  $\text{CDCl}_3$  at 298K

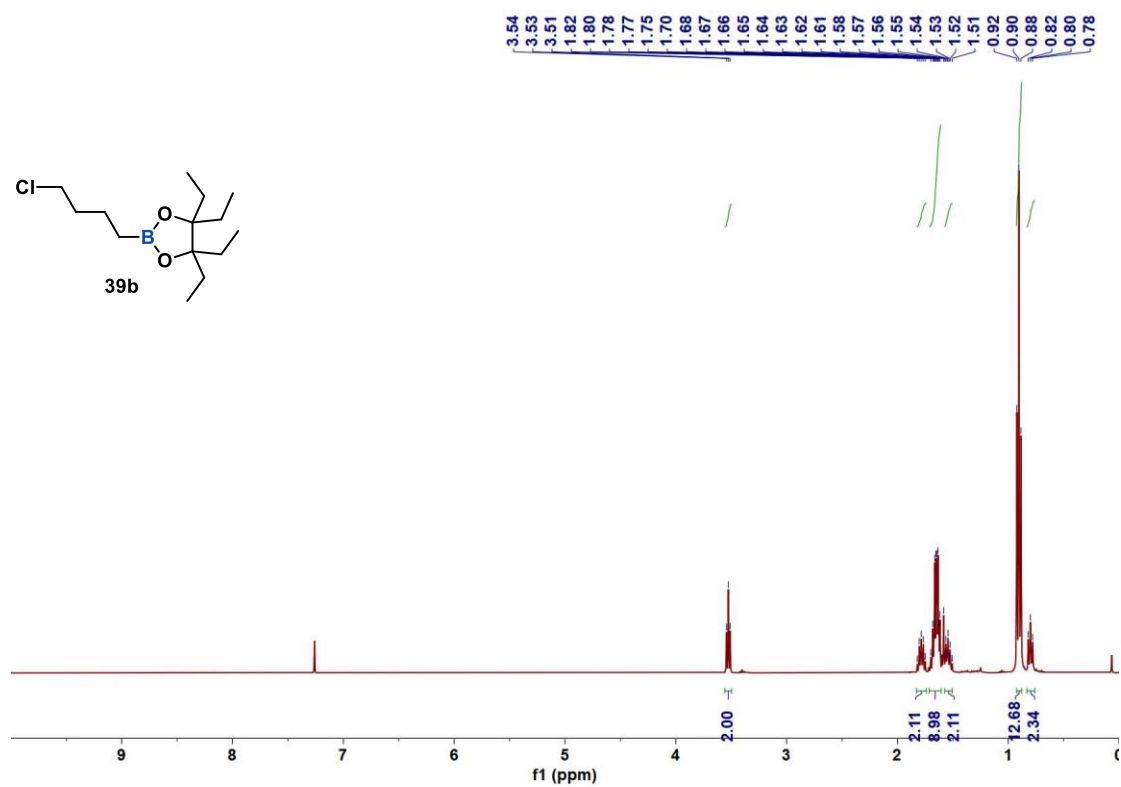

**Figure S206.** <sup>1</sup>H NMR spectrum of **39b** in CDCl<sub>3</sub> at 298K

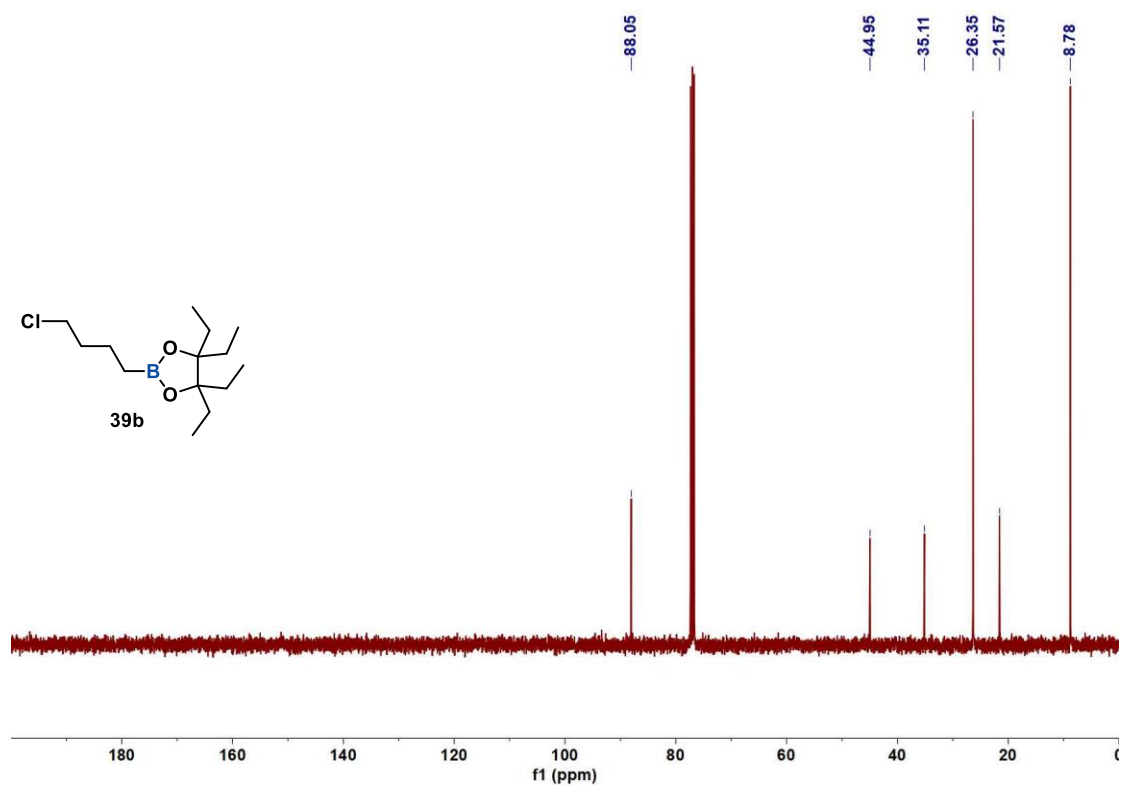

**Figure S207.**  $^{13}\text{C}\{^1\text{H}\}$  NMR spectrum of **39b** in  $\text{CDCl}_3$  at 298K



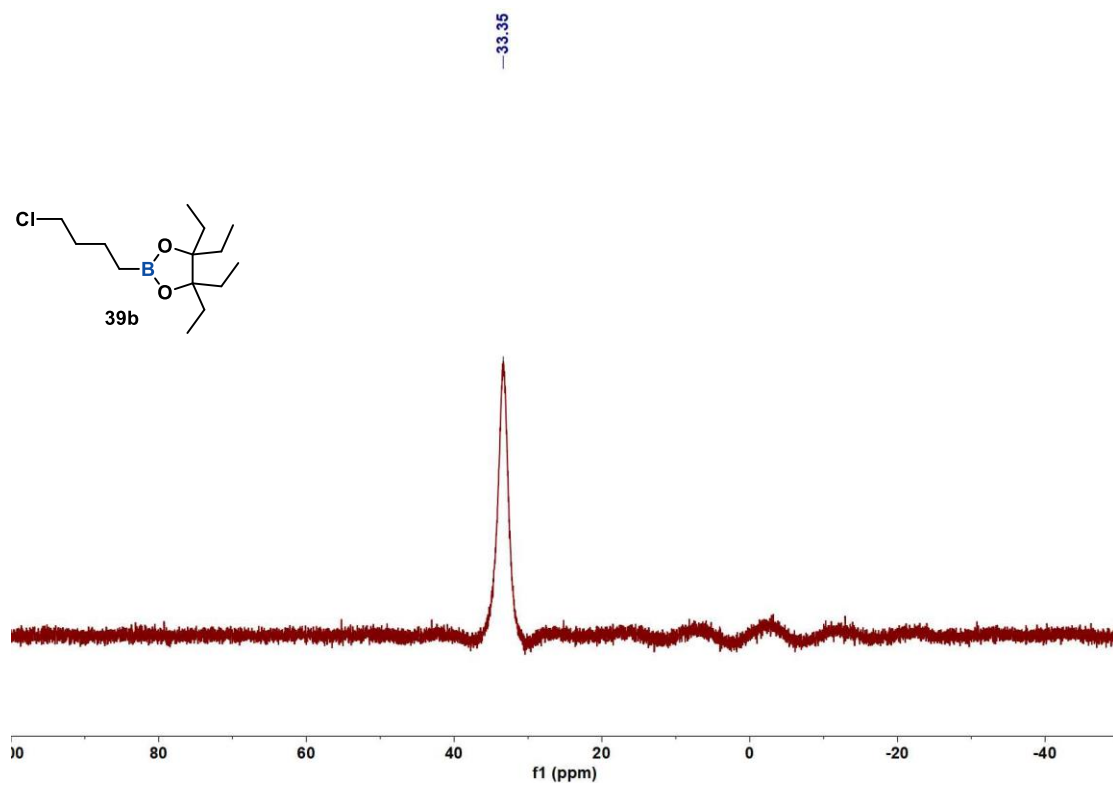

**Figure S208.**  $^{11}\text{B}\{^1\text{H}\}$  NMR spectrum of **39b** in  $\text{CDCl}_3$  at 298K

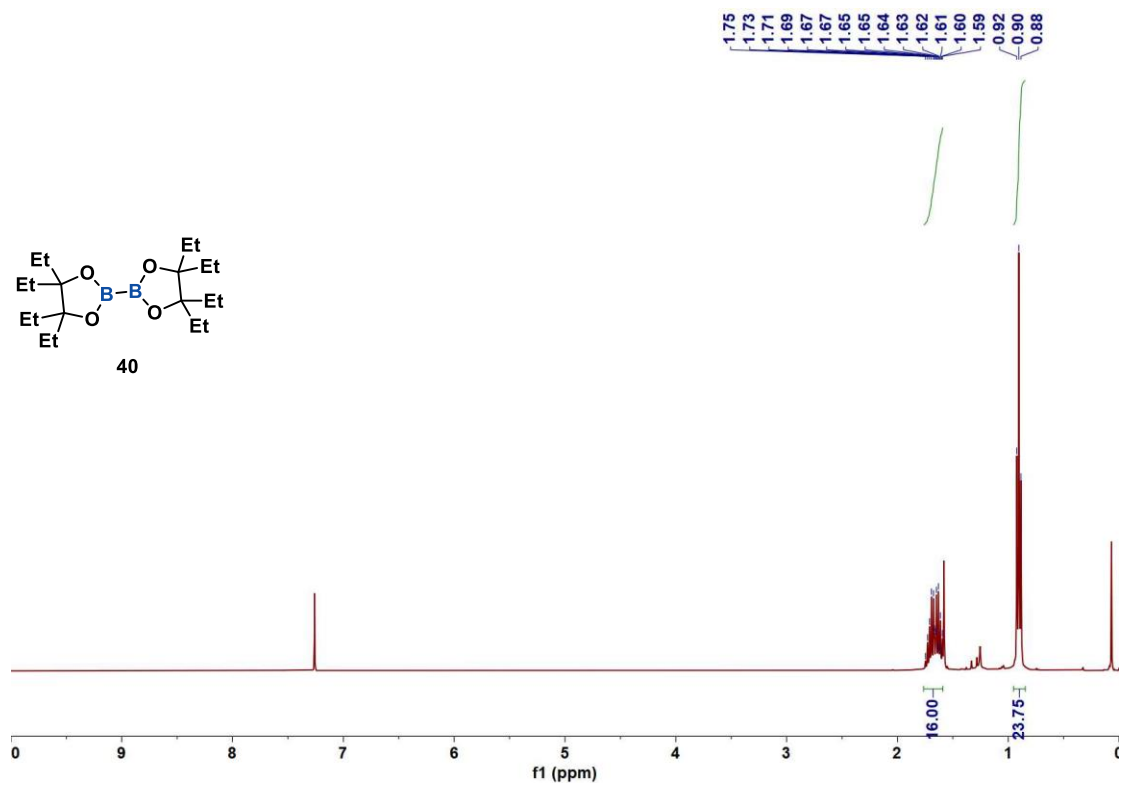

**Figure S209.**  $^1\text{H}$  NMR spectrum of **40** in  $\text{CDCl}_3$  at 298K

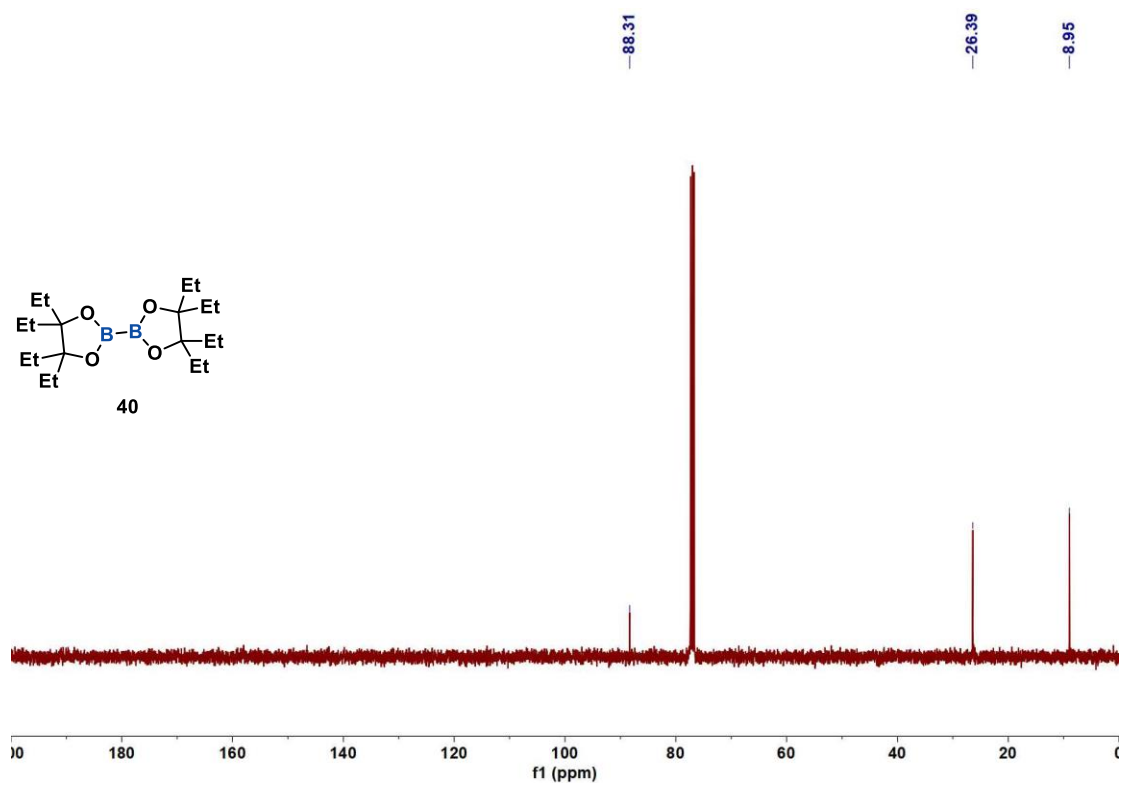

**Figure S210.**  $^{13}\text{C}\{^1\text{H}\}$  NMR spectrum of **40** in  $\text{CDCl}_3$  at 298K

-29.61

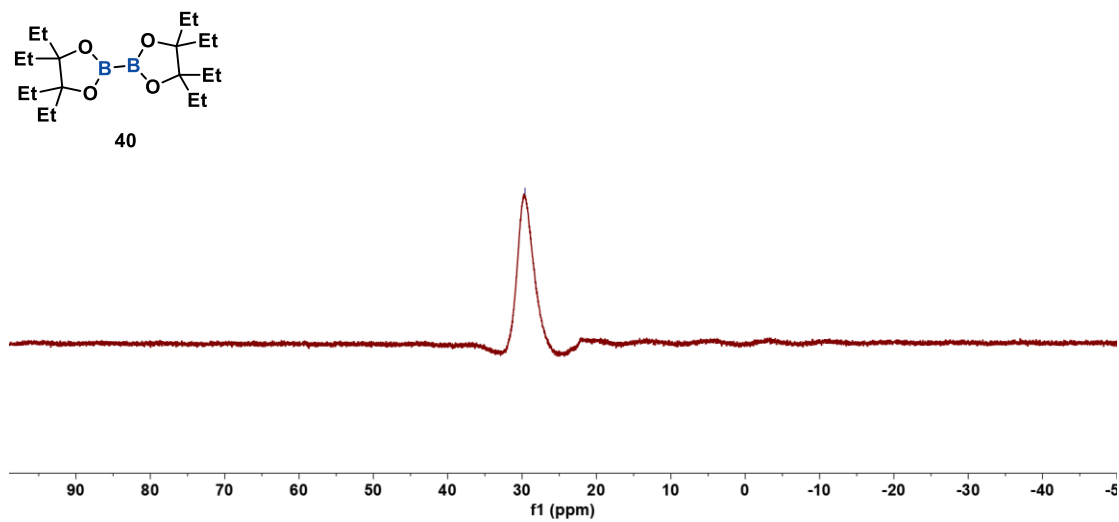

**Figure S211.**  $^{11}\text{B}\{^1\text{H}\}$  NMR spectrum of **40** in  $\text{CDCl}_3$  at 298K

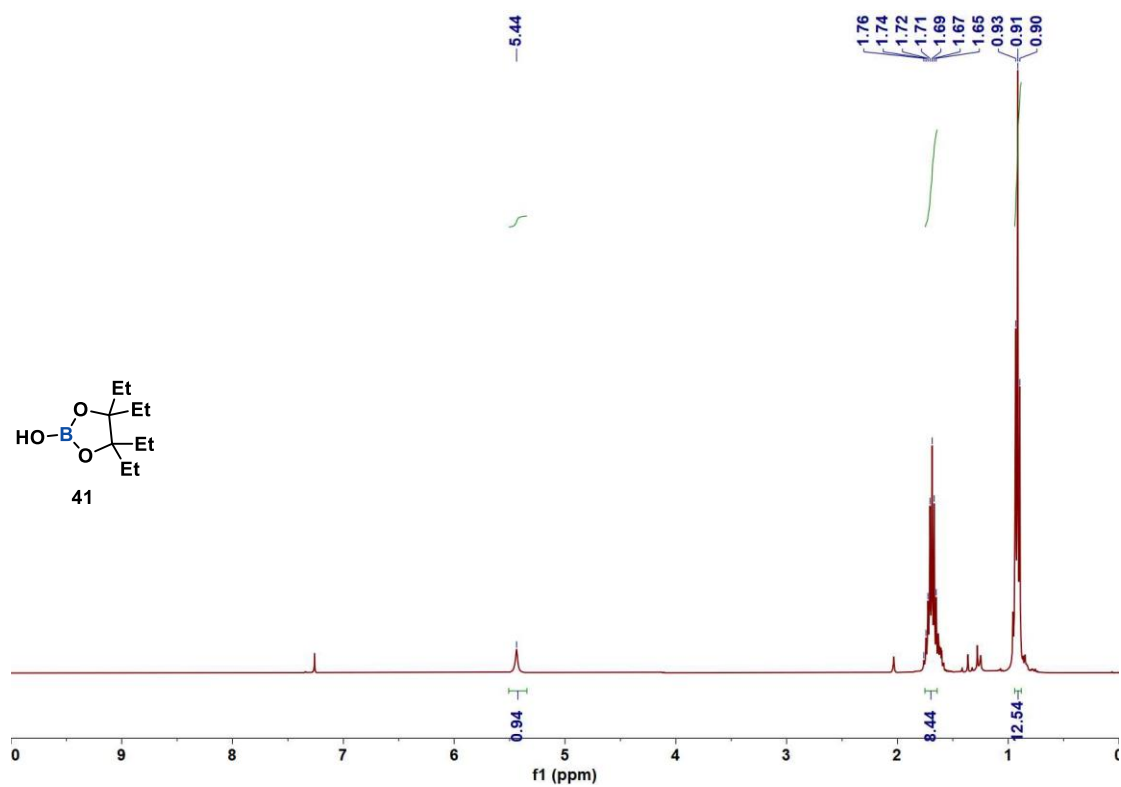

**Figure S212.** <sup>1</sup>H NMR spectrum of **41** in CDCl<sub>3</sub> at 298K

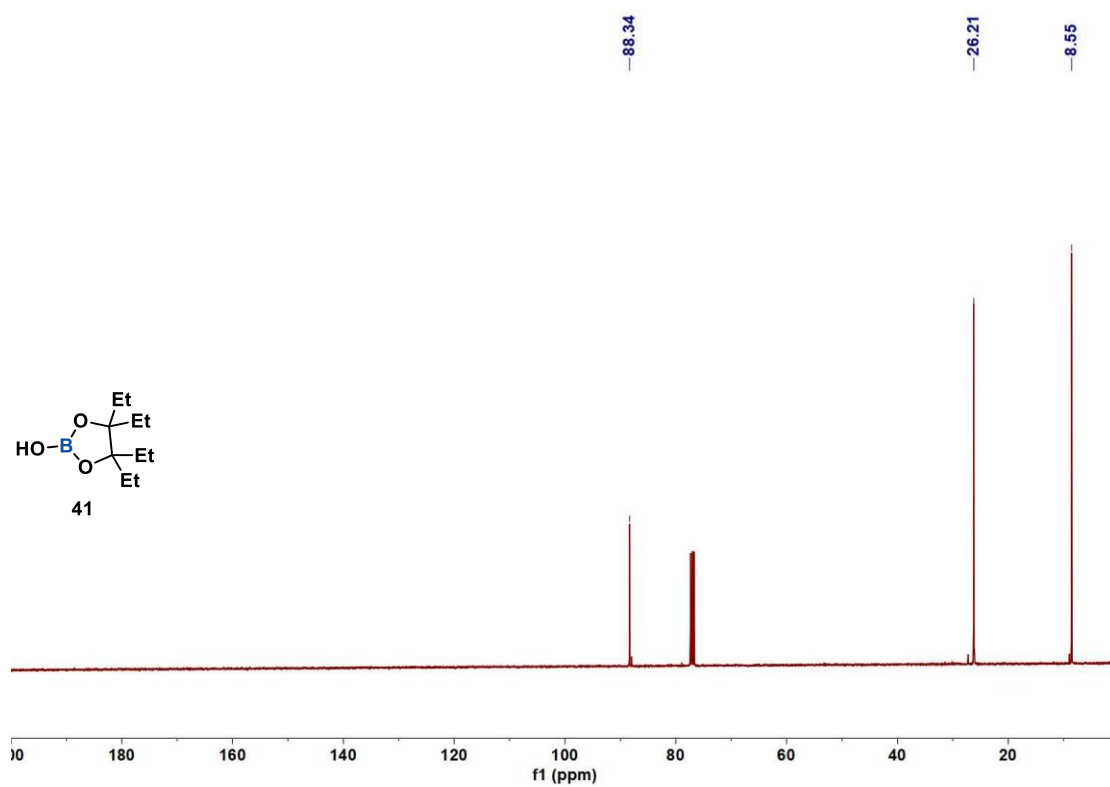

**Figure S213.**  $^{13}\text{C}\{^1\text{H}\}$  NMR spectrum of **41** in  $\text{CDCl}_3$  at 298K

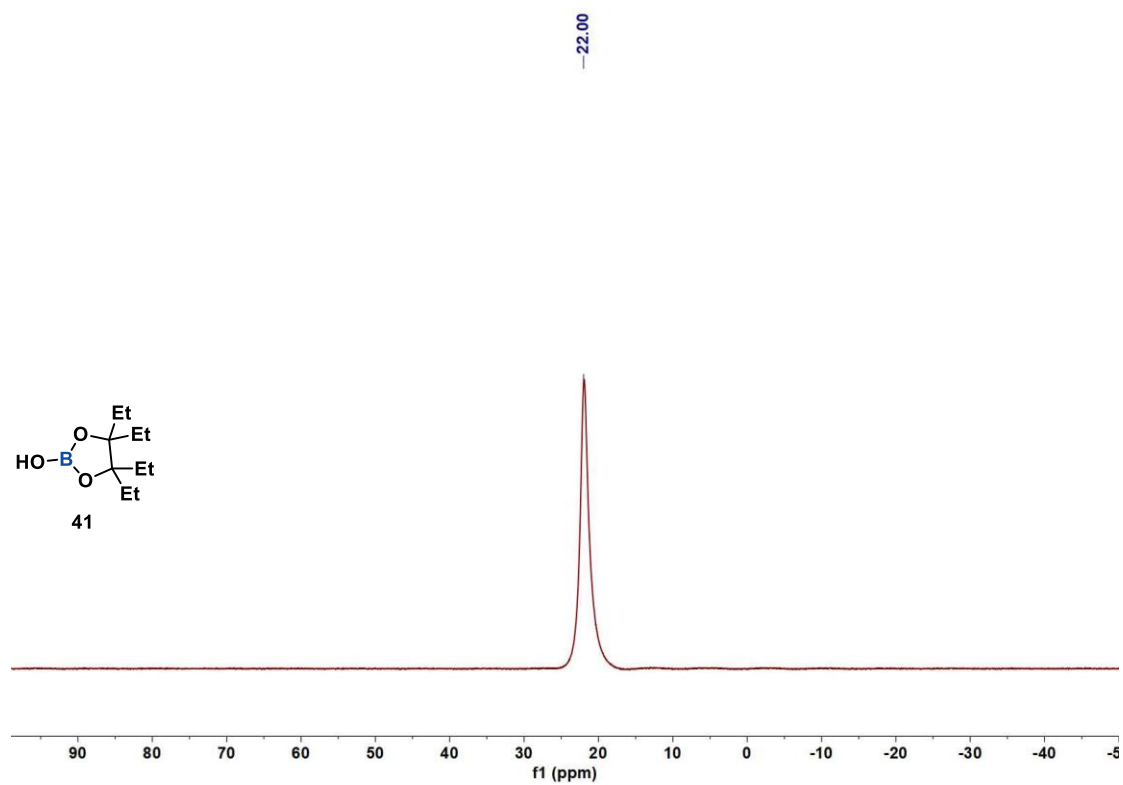

**Figure S214.**  $^{11}\text{B}\{^1\text{H}\}$  NMR spectrum of **41** in  $\text{CDCl}_3$  at 298K
